# Supplementary material for: RNA-Seq Analysis of Magnaporthe grisea Transcriptome Reveals the High Potential of ZnO Nanoparticles as a Nanofungicide
Source: Frontiers journal article supplement (doi:10.3389/fpls.2022.896283), 2022-06-10
Supplement: Data_Sheet_1.pdf [file Data_Sheet_1.pdf]

## Supplementary Table 2

**Table 1.** The results of analysis of variance (ANOVA). Mean squares are presented for the effect of treatment (doses of ZnO nanoparticles) during 10 days of treatment.

| S.O.V | df | Day1    | Day2     | Day3      | Day4      | Day5      | Day6      | Day7       | Day8       | Day9       | Day10      |
|-------|----|---------|----------|-----------|-----------|-----------|-----------|------------|------------|------------|------------|
| Dose  | 6  | 16.50** | 75.754** | 178.281** | 334.226** | 537.809** | 780.587** | 1065.934** | 1407.115** | 1788.906** | 2226.421** |
| error | 14 | 0.012   | 0.012    | 0.607     | 0.702     | 0.702     | 0.405     | 0.667      | 0.676      | 1.071      | 1.083333   |

\*\* indicating highly significant of the effect of treatments (dose of ZnO NPs) on growth of *M. griseae*. S.O.V: Source of variance.

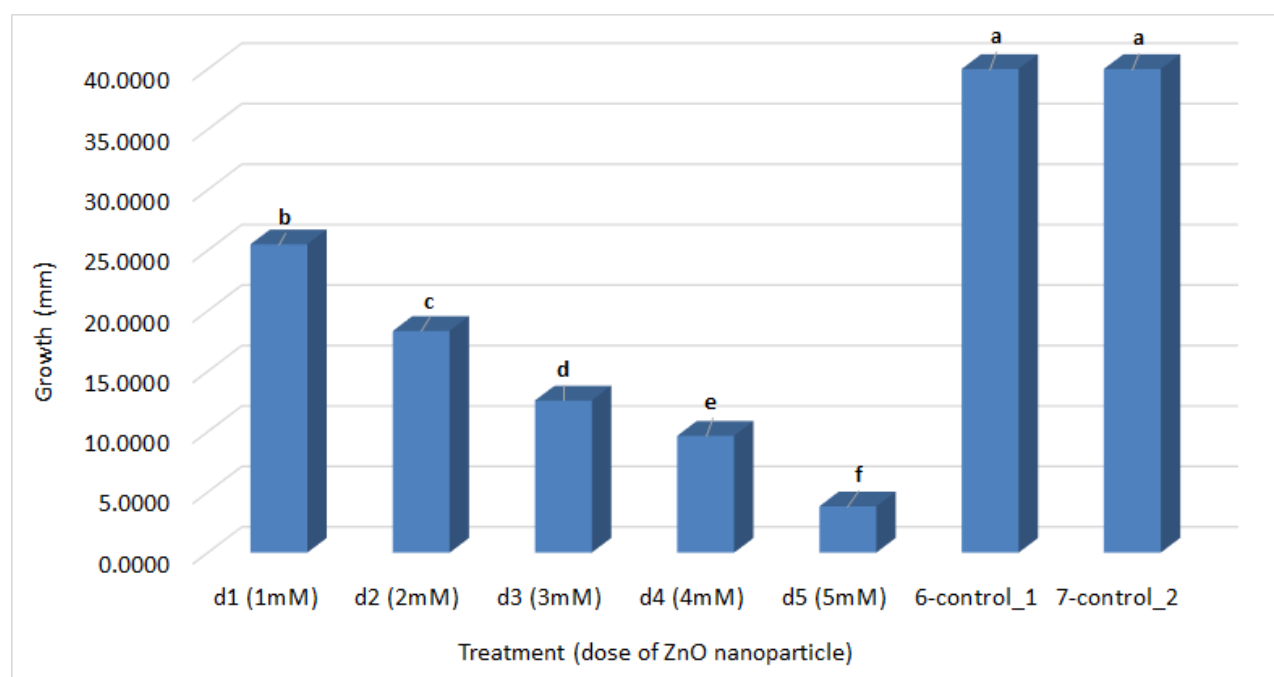

**Figure 1.** The results of Duncan's multiple range test for comparison of the effect of different doses of ZnO nanoparticles after 10<sup>th</sup> day. The significant differences between treatments are shown with different letters. As seen, dose d5 (5mM ZnO NPs) had the highest inhibitory effect on the growth of *Magnaporthe grisea*.
