# Supplementary material for: RNA-Seq Analysis of Magnaporthe grisea Transcriptome Reveals the High Potential of ZnO Nanoparticles as a Nanofungicide
Source: Front Plant Sci. 2022 Jun 10;13:896283. doi: 10.3389/fpls.2022.896283 (PMC9230574; doi:10.3389/fpls.2022.896283)
Supplement: Supplementary file 1 [file Table_1.xlsx]

## Sheet: Sheet1
Real-time PCR (q-RT-PCR) primer information
Gene name		sequence	TM	GC%	product length (bp)
SDH1	F	AATAGCGGTGAAGCCACCAA	59.96	50	279
	R	ATTGCCTCCCAGAGCTTGTC	60.03	55
AOX1	F	ACGATGCGAGACCTGTTGTT	59.97	50	171
	R	CAACTTGGTTCAGGTTGCCG	59.97	55
MEP	F	TCTTCCAGGTTCGTGATGGC	60.04	50	210
	R	ATGTGCCCTTGAGCGTGTAA	59.96	55
CYN1	F	TGTCGAAAAGGAGGTGGACG	59.97	55	338
	R	GTGCTTCTGTCCCACGATGA	60.04	55
ERB1	F	ATGGCTCATCAACCCAGCTC	60.11	55	237
	R	TCGGTCGTCTGCTTATCTGC	59.9	55
DRS1	F	AAGAAAATTGCCCACCACGC	59.97	50
	R	GAGGCAAGATCCGTCGCTAA	59.9	55	226

## Sheet: primers
Supplementary Table 1: Real-time PCR (q-RT-PCR) primer properties
Gene name	Forward/Reverse	sequence	TM	GC%	product length (bp)
SDH1	F	AATAGCGGTGAAGCCACCAA	59.96	50	279
	R	ATTGCCTCCCAGAGCTTGTC	60.03	55
AOX1	F	ACGATGCGAGACCTGTTGTT	59.97	50	171
	R	CAACTTGGTTCAGGTTGCCG	59.97	55
MEP	F	TCTTCCAGGTTCGTGATGGC	60.04	50	210
	R	ATGTGCCCTTGAGCGTGTAA	59.96	55
CYN1	F	TGTCGAAAAGGAGGTGGACG	59.97	55	338
	R	GTGCTTCTGTCCCACGATGA	60.04	55
ERB1	F	ATGGCTCATCAACCCAGCTC	60.11	55	237
	R	TCGGTCGTCTGCTTATCTGC	59.9	55
DRS1	F	AAGAAAATTGCCCACCACGC	59.97	50	226
	R	GAGGCAAGATCCGTCGCTAA	59.9	55
ACTIN	F	CCGTTCTGTTGACTGAGGCT	59.97	55	181
	R	ACGTGAGTAACACCGTCACC	59.97	55
