# Supplementary material for: RNA-Seq Analysis of Magnaporthe grisea Transcriptome Reveals the High Potential of ZnO Nanoparticles as a Nanofungicide
Source: Front Plant Sci. 2022 Jun 10;13:896283. doi: 10.3389/fpls.2022.896283 (PMC9230574; doi:10.3389/fpls.2022.896283)
Supplement: Supplementary file 3 [file Table_3.xlsx]

## Sheet: Mapping
STAR	All_Reads	Uniquely_mapped	Mapped_multiple_loci	Mapped_too_many_loci	Unique mapped	Overall mapped
Sample_1	22356101	19430400	529901	215050	0.869132	0.902454
Sample_2	21890104	19055551	531566	209657	0.87051	0.904371
Sample_3	22822093	20142222	429405	146711	0.882576	0.907819
Sample_4	26961436	23797283	516467	174370	0.882642	0.908265
Hisat2	All_Reads	Concordantly1	ConcordantlyMore1	Discordantly1	DiscordantlyMore1	OverallAlignmentRate
Sample_1	22356101	18896537	389116	753939	42890	0.884
Sample_2	21890104	18560881	387198	710112	41924	0.8858
Sample_3	22822093	19561933	277685	812908	31186	0.8921
Sample_4	26961436	23087701	325662	998776	37851	0.8912

## Sheet: Hisat2_DESeq
Id	Control-1	Control-2	Treat-1	Treat-2	norm.control-1	norm.control-2	norm.Treat-1	norm.Treat-2	baseMean	Control	Treat	FoldChange	log2FoldChange	pvalue	padj	dispGeneEst	dispFit	dispMAP	dispersion	betaConv	maxCooks
ENSRNA049512957	146	173	4732	5508	142	172	5193	5128	2658.92	157	5160	32.898	5.04	0	0	0	0.0019	0.0018	0.0018	TRUE	NA
MGG_00052	5337	4949	19012	21646	5194	4917	20866	20154	12782.6	5056	20510	4.056	2.02	0	0	0.0008	0.0008	0.0008	0.0008	TRUE	NA
MGG_00110	187	183	21017	25304	182	182	23066	23560	11747.4	182	23313	128.167	7.002	0	0	0	0.0008	0.0007	0.0007	TRUE	NA
MGG_00112	205	192	20084	24374	200	191	22042	22694	11281.6	196	22368	114.614	6.841	0	0	0	0.0008	0.0008	0.0008	TRUE	NA
MGG_00150	37583	37831	102490	123900	36576	37586	112483	115359	75501.1	37081	113921	3.072	1.619	0	0	0.0003	0.0005	0.0005	0.0005	TRUE	NA
MGG_00272	8431	8876	1159	1306	8205	8818	1272	1216	4877.91	8512	1244	0.146	-2.775	0	0	0.0017	0.0013	0.0013	0.0013	TRUE	NA
MGG_00287	453	449	6085	7114	441	446	6678	6624	3547.22	444	6651	14.997	3.907	0	0	0	0.0016	0.0013	0.0013	TRUE	NA
MGG_00289	23811	23148	6545	7755	23173	22998	7183	7220	15143.7	23086	7202	0.312	-1.681	0	0	0	0.0007	0.0006	0.0006	TRUE	NA
MGG_00298	759	799	5764	6926	739	794	6326	6449	3576.77	766	6388	8.338	3.06	0	0	0	0.0016	0.0014	0.0014	TRUE	NA
MGG_00395	792	807	10654	12646	771	802	11693	11774	6259.9	786	11734	14.925	3.9	0	0	0	0.0011	0.001	0.001	TRUE	NA
MGG_00450	10593	9977	1850	2035	10309	9912	2030	1895	6036.68	10110	1962	0.194	-2.366	0	0	0.001	0.0011	0.0011	0.0011	TRUE	NA
MGG_00490	1641	1470	7009	8136	1597	1460	7692	7575	4581.27	1528	7634	4.992	2.32	0	0	0.0013	0.0013	0.0013	0.0013	TRUE	NA
MGG_00527	12820	11664	39397	45243	12477	11588	43238	42124	27356.9	12032	42681	3.547	1.827	0	0	0.0014	0.0006	0.0008	0.0008	TRUE	NA
MGG_00587	2893	2941	22731	26665	2816	2922	24947	24827	13877.9	2869	24887	8.676	3.117	0	0	0	0.0008	0.0007	0.0007	TRUE	NA
MGG_00592	221366	209677	452864	525617	215436	208319	497020	489384	352540	211878	493202	2.328	1.219	0	0	0.0003	0.0005	0.0005	0.0005	TRUE	NA
MGG_00649	486	504	8291	9720	473	501	9099	9050	4780.77	487	9074	18.642	4.221	0	0	0	0.0013	0.0011	0.0011	TRUE	NA
MGG_00684	3269	3135	10354	12232	3181	3115	11364	11389	7262.12	3148	11376	3.614	1.853	0	0	0	0.001	0.0008	0.0008	TRUE	NA
MGG_00742	7860	7826	19225	22924	7649	7775	21100	21344	14467	7712	21222	2.752	1.46	0	0	0	0.0008	0.0006	0.0006	TRUE	NA
MGG_00832	342	346	8896	10258	333	344	9763	9551	4997.71	338	9657	28.547	4.835	0	0	0	0.0013	0.0011	0.0011	TRUE	NA
MGG_00835	513	452	15077	16817	499	449	16547	15658	8288.28	474	16102	33.943	5.085	0	0	0.0014	0.001	0.001	0.001	TRUE	NA
MGG_00892	18494	16713	3892	4487	17999	16605	4271	4178	10763.1	17302	4224	0.244	-2.034	0	0	0.0015	0.0009	0.001	0.001	TRUE	NA
MGG_00940	13062	12891	3092	3593	12712	12807	3393	3345	8064.6	12760	3369	0.264	-1.921	0	0	0	0.001	0.0008	0.0008	TRUE	NA
MGG_00992	24119	23888	3867	4757	23473	23733	4244	4429	13969.8	23603	4336	0.184	-2.444	0	0	0.0002	0.0008	0.0007	0.0007	TRUE	NA
MGG_01085	1437	1388	71912	83330	1399	1379	78924	77586	39821.7	1389	78255	56.345	5.816	0	0	0	0.0006	0.0005	0.0005	TRUE	NA
MGG_01129	281	261	3119	3962	273	259	3423	3689	1911.19	266	3556	13.351	3.739	0	0	0	0.0025	0.0024	0.0024	TRUE	NA
MGG_01336	812	896	7912	9101	790	890	8683	8474	4709.38	840	8578	10.212	3.352	0	0	0.0024	0.0013	0.0013	0.0013	TRUE	NA
MGG_01364	2067	1966	32153	38208	2012	1953	35288	35574	18706.8	1982	35431	17.871	4.16	0	0	0	0.0007	0.0006	0.0006	TRUE	NA
MGG_01778	137	106	2752	3467	133	105	3020	3228	1621.74	119	3124	26.166	4.71	0	0	0.0037	0.0029	0.0029	0.0029	TRUE	NA
MGG_01944	3252	3218	10852	12833	3165	3197	11910	11948	7555.13	3181	11929	3.75	1.907	0	0	0	0.001	0.0008	0.0008	TRUE	NA
MGG_02072	1333	1138	34353	40078	1297	1131	37703	37315	19361.4	1214	37509	30.894	4.949	0	0	0.0039	0.0007	0.0008	0.0039	TRUE	NA
MGG_02210	442	375	91846	104067	430	373	100801	96893	49624.3	402	98847	246.195	7.944	0	0	0.003	0.0006	0.0006	0.003	TRUE	NA
MGG_02234	92	88	26135	28382	90	87	28683	26426	13821.4	88	27554	311.337	8.282	0	0	0	0.0008	0.001	0.001	TRUE	NA
MGG_02252	228	241	2905	3415	222	239	3188	3180	1707.29	230	3184	13.806	3.787	0	0	0	0.0027	0.0024	0.0024	TRUE	NA
MGG_02329	8703	8104	525	621	8470	8052	576	578	4418.94	8261	577	0.07	-3.839	0	0	0	0.0014	0.0013	0.0013	TRUE	NA
MGG_02402	144	155	2956	3529	140	154	3244	3286	1706.02	147	3265	22.209	4.473	0	0	0	0.0027	0.0024	0.0024	TRUE	NA
MGG_02410	5583	5563	18203	21331	5433	5527	19978	19861	12699.7	5480	19920	3.635	1.862	0	0	0	0.0008	0.0007	0.0007	TRUE	NA
MGG_02648	120	90	5711	6714	117	89	6268	6251	3181.3	103	6260	60.64	5.922	0	0	0	0.0017	0.0016	0.0016	TRUE	NA
MGG_02774	4134	3774	23116	26638	4023	3750	25370	24802	14486.1	3886	25086	6.454	2.69	0	0	0.0011	0.0008	0.0008	0.0008	TRUE	NA
MGG_02787	1057	1076	5070	6113	1029	1069	5564	5692	3338.42	1049	5628	5.367	2.424	0	0	0	0.0016	0.0014	0.0014	TRUE	NA
MGG_02818	65	76	9017	10788	63	76	9896	10044	5019.82	70	9970	143.827	7.168	0	0	0	0.0013	0.0011	0.0011	TRUE	NA
MGG_02851	43458	43401	13235	15669	42294	43120	14525	14589	28632	42707	14557	0.341	-1.553	0	0	0.0001	0.0006	0.0005	0.0005	TRUE	NA
MGG_03115	19729	19097	5469	6260	19201	18973	6002	5828	12501.1	19087	5915	0.31	-1.69	0	0	0.0001	0.0008	0.0007	0.0007	TRUE	NA
MGG_03133	1205	1112	16615	18687	1173	1105	18235	17399	9477.84	1139	17817	15.642	3.967	0	0	0.001	0.0009	0.0009	0.0009	TRUE	NA
MGG_03218	9863	9632	79759	97449	9599	9570	87536	90731	49358.9	9584	89134	9.3	3.217	0	0	0.0002	0.0006	0.0005	0.0005	TRUE	NA
MGG_03292	945	990	7990	9983	920	984	8769	9295	4991.79	952	9032	9.494	3.247	0	0	0.0015	0.0013	0.0013	0.0013	TRUE	NA
MGG_03348	4256	3910	87609	103140	4142	3885	96151	96030	50052	4014	96090	23.94	4.581	0	0	0.0008	0.0006	0.0006	0.0006	TRUE	NA
MGG_03364	43	49	10532	10992	42	49	11559	10234	5470.93	46	10896	240.839	7.912	0	0	0	0.0012	0.0017	0.0017	TRUE	NA
MGG_03383	11051	10690	1403	1546	10755	10621	1540	1439	6088.74	10688	1490	0.139	-2.845	0	0	0	0.0011	0.001	0.001	TRUE	NA
MGG_03404	59635	59968	19822	23433	58038	59580	21755	21818	40297.4	58809	21786	0.37	-1.433	0	0	0.0001	0.0006	0.0005	0.0005	TRUE	NA
MGG_03442	3147	3087	12947	15427	3063	3067	14209	14364	8675.66	3065	14286	4.662	2.221	0	0	0	0.0009	0.0008	0.0008	TRUE	NA
MGG_03470	375	414	5201	6108	365	411	5708	5687	3042.83	388	5698	14.684	3.876	0	0	0	0.0018	0.0016	0.0016	TRUE	NA
MGG_03504	25470	26512	3980	5003	24788	26340	4368	4658	15038.5	25564	4513	0.177	-2.501	0	0	0.0017	0.0008	0.0009	0.0009	TRUE	NA
MGG_03593	419721	408626	58821	69590	408478	405979	64556	64793	235952	407228	64674	0.159	-2.655	0	0	0	0.0005	0.0004	0.0004	TRUE	NA
MGG_03667	8535	8842	28036	33904	8306	8785	30770	31567	19856.9	8546	31168	3.648	1.867	0	0	0.0008	0.0007	0.0007	0.0007	TRUE	NA
MGG_03817	258	242	3074	3408	251	240	3374	3173	1759.58	246	3274	13.314	3.735	0	0	0	0.0027	0.0025	0.0025	TRUE	NA
MGG_03865	23152	23621	4244	5227	22532	23468	4658	4867	13881.1	23000	4762	0.207	-2.271	0	0	0.0006	0.0008	0.0008	0.0008	TRUE	NA
MGG_03914	1601	1462	15756	19232	1558	1453	17292	17906	9552.29	1506	17599	11.691	3.547	0	0	0.0008	0.0009	0.0009	0.0009	TRUE	NA
MGG_04034	166652	162106	54869	63503	162188	161056	60219	59125	110647	161622	59672	0.369	-1.438	0	0	0.0001	0.0005	0.0004	0.0004	TRUE	NA
MGG_04093	9215	9268	2143	2536	8968	9208	2352	2361	5722.31	9088	2356	0.259	-1.947	0	0	0	0.0012	0.001	0.001	TRUE	NA
MGG_04159	11605	11388	2785	3238	11294	11314	3057	3015	7169.93	11304	3036	0.269	-1.897	0	0	0	0.001	0.0008	0.0008	TRUE	NA
MGG_04241	3885	3984	21399	25729	3781	3958	23485	23955	13795	3870	23720	6.131	2.616	0	0	0.0003	0.0008	0.0007	0.0007	TRUE	NA
MGG_04251	944	887	10090	11441	919	881	11074	10652	5881.52	900	10863	12.067	3.593	0	0	0	0.0011	0.0011	0.0011	TRUE	NA
MGG_04337	23498	22124	6439	7549	22869	21981	7067	7029	14736.2	22425	7048	0.314	-1.67	0	0	0.0004	0.0008	0.0007	0.0007	TRUE	NA
MGG_04362	12521	12529	48400	58885	12186	12448	53119	54826	33144.6	12317	53972	4.382	2.132	0	0	0.0003	0.0006	0.0006	0.0006	TRUE	NA
MGG_04574	5134	5230	17131	20345	4996	5196	18801	18943	11984.1	5096	18872	3.703	1.889	0	0	0.0001	0.0008	0.0007	0.0007	TRUE	NA
MGG_04603	8712	8656	432	542	8479	8600	474	505	4514.33	8540	490	0.057	-4.123	0	0	0	0.0013	0.0012	0.0012	TRUE	NA
MGG_04617	4771	4857	28870	33020	4643	4826	31685	30744	17974.4	4734	31214	6.593	2.721	0	0	0.0004	0.0007	0.0007	0.0007	TRUE	NA
MGG_04656	1507	1495	8268	9618	1467	1485	9074	8955	5245.27	1476	9014	6.107	2.611	0	0	0	0.0012	0.001	0.001	TRUE	NA
MGG_04736	44984	41807	123045	140884	43779	41536	135042	131172	87882.4	42658	133107	3.12	1.642	0	0	0.0009	0.0005	0.0006	0.0006	TRUE	NA
MGG_04737	163	150	3847	4734	159	149	4222	4408	2234.36	154	4315	28.048	4.81	0	0	0	0.0022	0.002	0.002	TRUE	NA
MGG_04738	443	403	3457	3972	431	400	3794	3698	2080.95	416	3746	9.007	3.171	0	0	0	0.0023	0.0021	0.0021	TRUE	NA
MGG_04765	6726	6771	28863	34494	6546	6727	31677	32116	19266.6	6636	31896	4.807	2.265	0	0	0.0001	0.0007	0.0006	0.0006	TRUE	NA
MGG_04804	2662	2903	10993	13347	2591	2884	12065	12427	7491.67	2738	12246	4.474	2.162	0	0	0.0026	0.001	0.0012	0.0012	TRUE	NA
MGG_04900	416	368	7754	8272	405	366	8510	7702	4245.57	386	8106	21.029	4.394	0	0	0.0042	0.0014	0.0017	0.0017	TRUE	NA
MGG_04922	168	172	6306	7241	163	171	6921	6742	3499.27	167	6832	40.862	5.353	0	0	0	0.0016	0.0014	0.0014	TRUE	NA
MGG_04973	2225	2202	13002	15074	2165	2188	14270	14035	8164.44	2176	14152	6.502	2.701	0	0	0	0.001	0.0008	0.0008	TRUE	NA
MGG_04994	12874	12412	1158	1361	12529	12332	1271	1267	6849.71	12430	1269	0.102	-3.292	0	0	0	0.0011	0.0009	0.0009	TRUE	NA
MGG_05011	2184	2188	16915	19805	2125	2174	18564	18440	10325.8	2150	18502	8.607	3.106	0	0	0	0.0009	0.0007	0.0007	TRUE	NA
MGG_05030	39179	38822	8890	10443	38130	38571	9757	9723	24045	38350	9740	0.254	-1.977	0	0	0	0.0007	0.0005	0.0005	TRUE	NA
MGG_05046	153	132	3544	3981	149	131	3890	3707	1969.04	140	3798	27.106	4.761	0	0	0	0.0024	0.0023	0.0023	TRUE	NA
MGG_05059	1349	1272	8650	9690	1313	1264	9493	9022	5273.01	1288	9258	7.184	2.845	0	0	0.0009	0.0012	0.0012	0.0012	TRUE	NA
MGG_05106	46	48	7295	8621	45	48	8006	8027	4031.37	46	8016	173.466	7.439	0	0	0	0.0014	0.0013	0.0013	TRUE	NA
MGG_05364	25325	24078	7876	9463	24647	23922	8644	8811	16505.8	24284	8728	0.359	-1.476	0	0	0.0003	0.0007	0.0006	0.0006	TRUE	NA
MGG_05402	288	279	3183	4156	280	277	3493	3870	1980.09	278	3682	13.212	3.724	0	0	0	0.0024	0.0025	0.0025	TRUE	NA
MGG_05406	17667	15632	1930	2309	17194	15531	2118	2150	9248.13	16362	2134	0.13	-2.939	0	0	0.0021	0.0009	0.0012	0.0012	TRUE	NA
MGG_05638	99262	101749	34941	42454	96603	101090	38348	39527	68892.1	98846	38938	0.394	-1.344	0	0	0.0007	0.0006	0.0006	0.0006	TRUE	NA
MGG_05690	5977	6156	18742	22434	5817	6116	20569	20888	13347.5	5966	20728	3.474	1.797	0	0	0.0005	0.0008	0.0007	0.0007	TRUE	NA
MGG_05806	794	897	19180	22554	773	891	21050	20999	10928.3	832	21024	25.282	4.66	0	0	0.0038	0.0008	0.0009	0.0009	TRUE	NA
MGG_05824	98	117	20408	23300	95	116	22398	21694	11075.8	106	22046	208.537	7.704	0	0	0.0005	0.0008	0.0008	0.0008	TRUE	NA
MGG_05826	2080	1880	10083	11337	2024	1868	11066	10555	6378.43	1946	10810	5.554	2.473	0	0	0.0016	0.0011	0.0012	0.0012	TRUE	NA
MGG_05860	372	347	3432	4168	362	345	3767	3881	2088.53	354	3824	10.82	3.436	0	0	0	0.0023	0.002	0.002	TRUE	NA
MGG_06116	578	502	7880	9244	563	499	8648	8607	4579.09	531	8628	16.253	4.023	0	0	0	0.0013	0.0013	0.0013	TRUE	NA
MGG_06155	263	310	7138	8573	256	308	7834	7982	4094.99	282	7908	28.066	4.811	0	0	0.0001	0.0014	0.0014	0.0014	TRUE	NA
MGG_06203	73642	70581	175100	202407	71669	70124	192173	188454	130605	70896	190314	2.684	1.425	0	0	0.0002	0.0005	0.0005	0.0005	TRUE	NA
MGG_06238	1632	1539	36662	43087	1588	1529	40237	40117	20867.7	1558	40177	25.774	4.688	0	0	0	0.0007	0.0006	0.0006	TRUE	NA
MGG_06298	3185	2997	15309	17472	3100	2978	16802	16268	9786.63	3039	16535	5.441	2.444	0	0	0.0005	0.0009	0.0008	0.0008	TRUE	NA
MGG_06470	6343	6428	17490	21054	6173	6386	19195	19603	12839.4	6280	19399	3.089	1.627	0	0	0.0002	0.0008	0.0007	0.0007	TRUE	NA
MGG_06538	16222	15315	138861	159734	15787	15216	152400	148723	83031.6	15502	150562	9.712	3.28	0	0	0.0004	0.0005	0.0005	0.0005	TRUE	NA
MGG_06610	708	648	4610	5140	689	644	5059	4786	2794.5	666	4922	7.384	2.884	0	0	0.0012	0.0019	0.0018	0.0018	TRUE	NA
MGG_06653	35317	34070	11056	12933	34371	33849	12134	12041	23098.9	34110	12088	0.354	-1.497	0	0	0	0.0007	0.0005	0.0005	TRUE	NA
MGG_06666	2998	3075	10960	13562	2918	3055	12029	12627	7657.13	2986	12328	4.129	2.046	0	0	0.001	0.001	0.001	0.001	TRUE	NA
MGG_06847	2597	2611	13606	16151	2527	2594	14933	15038	8772.95	2560	14986	5.852	2.549	0	0	0	0.0009	0.0008	0.0008	TRUE	NA
MGG_07100	470	463	8727	10484	457	460	9578	9761	5064.15	458	9670	21.082	4.398	0	0	0	0.0013	0.0011	0.0011	TRUE	NA
MGG_07235	1702	1786	11475	13762	1656	1774	12594	12813	7209.5	1715	12704	7.407	2.889	0	0	0.0006	0.001	0.001	0.001	TRUE	NA
MGG_07246	101	83	20497	23502	98	82	22496	21882	11139.5	90	22189	245.287	7.938	0	0	0	0.0008	0.0008	0.0008	TRUE	NA
MGG_07287	3160	3115	11053	13170	3075	3095	12131	12262	7640.75	3085	12196	3.954	1.983	0	0	0	0.001	0.0008	0.0008	TRUE	NA
MGG_07306	5296	4791	23484	27060	5154	4760	25774	25195	15220.6	4957	25484	5.14	2.362	0	0	0.0015	0.0007	0.0008	0.0008	TRUE	NA
MGG_07307	1619	1511	9379	11068	1576	1501	10293	10305	5918.84	1538	10299	6.694	2.743	0	0	0	0.0011	0.001	0.001	TRUE	NA
MGG_07331	2062	2155	23747	29175	2007	2141	26062	27164	14343.5	2074	26613	12.835	3.682	0	0	0.001	0.0008	0.0008	0.0008	TRUE	NA
MGG_07334	950	864	9159	10557	925	858	10052	9829	5416.06	892	9940	11.148	3.479	0	0	0.0003	0.0012	0.0011	0.0011	TRUE	NA
MGG_07339	754	774	4395	5234	734	769	4824	4873	2799.88	752	4848	6.454	2.69	0	0	0	0.0019	0.0016	0.0016	TRUE	NA
MGG_07367	2987	2590	16308	18205	2907	2573	17898	16950	10082.1	2740	17424	6.357	2.668	0	0	0.004	0.0009	0.0013	0.0013	TRUE	NA
MGG_07419	23306	21104	1589	1758	22682	20967	1744	1637	11757.4	21824	1690	0.077	-3.692	0	0	0.0019	0.0008	0.001	0.001	TRUE	NA
MGG_07560	8596	8084	1654	1987	8366	8032	1815	1850	5015.67	8199	1832	0.224	-2.161	0	0	0	0.0013	0.0011	0.0011	TRUE	NA
MGG_07571	1650	1523	48130	54654	1606	1513	52823	50886	26707.1	1560	51854	33.245	5.055	0	0	0.0006	0.0006	0.0007	0.0007	TRUE	NA
MGG_07606	2868	2805	10707	12196	2791	2787	11751	11355	7171.06	2789	11553	4.142	2.05	0	0	0	0.001	0.0009	0.0009	TRUE	NA
MGG_07639	683	703	10714	12159	665	698	11759	11321	6110.66	682	11540	16.931	4.082	0	0	0	0.0011	0.001	0.001	TRUE	NA
MGG_07832	388	408	15583	17588	378	405	17102	16376	8565.24	392	16739	42.765	5.418	0	0	0	0.0009	0.0009	0.0009	TRUE	NA
MGG_07833	510	478	31885	35930	496	475	34994	33453	17354.6	486	34224	70.457	6.139	0	0	0	0.0007	0.0007	0.0007	TRUE	NA
MGG_08072	3243	3433	14828	18150	3156	3411	16274	16899	9934.88	3284	16586	5.052	2.337	0	0	0.0015	0.0009	0.001	0.001	TRUE	NA
MGG_08074	11643	10512	1453	1591	11331	10444	1595	1481	6212.76	10888	1538	0.141	-2.825	0	0	0.0023	0.0011	0.0013	0.0013	TRUE	NA
MGG_08113	7279	7642	26237	31220	7084	7592	28795	29068	18134.9	7338	28932	3.943	1.979	0	0	0.0011	0.0007	0.0008	0.0008	TRUE	NA
MGG_08253	1441	1454	6610	7324	1402	1445	7254	6819	4230.15	1424	7036	4.942	2.305	0	0	0.0011	0.0014	0.0014	0.0014	TRUE	NA
MGG_08258	63364	62431	14878	18126	61667	62027	16329	16876	39224.6	61847	16602	0.268	-1.897	0	0	0.0002	0.0006	0.0005	0.0005	TRUE	NA
MGG_08296	5511	5902	555	703	5363	5864	609	655	3122.7	5614	632	0.113	-3.149	0	0	0.0029	0.0017	0.0019	0.0019	TRUE	NA
MGG_08299	765	786	8079	9424	745	781	8867	8774	4791.63	763	8820	11.566	3.532	0	0	0	0.0013	0.0011	0.0011	TRUE	NA
MGG_08359	24031	22581	1521	1795	23387	22435	1669	1671	12290.6	22911	1670	0.073	-3.778	0	0	0	0.0008	0.0008	0.0008	TRUE	NA
MGG_08363	8052	7820	1104	1210	7836	7769	1212	1127	4485.97	7802	1170	0.15	-2.74	0	0	0	0.0014	0.0012	0.0012	TRUE	NA
MGG_08543	293	275	15117	17693	285	273	16591	16473	8405.67	279	16532	59.204	5.888	0	0	0	0.001	0.0008	0.0008	TRUE	NA
MGG_08732	2727	2498	21528	25720	2654	2482	23627	23947	13177.5	2568	23787	9.262	3.211	0	0	0.0007	0.0008	0.0008	0.0008	TRUE	NA
MGG_08824	331	352	3462	4226	322	350	3800	3935	2101.52	336	3868	11.516	3.526	0	0	0	0.0023	0.0021	0.0021	TRUE	NA
MGG_08830	41307	38467	9095	10420	40201	38218	9982	9702	24525.5	39210	9842	0.251	-1.994	0	0	0.0007	0.0007	0.0007	0.0007	TRUE	NA
MGG_08888	11438	11362	32268	38921	11132	11288	35414	36238	23518.1	11210	35826	3.196	1.676	0	0	0.0002	0.0007	0.0006	0.0006	TRUE	NA
MGG_08989	1069	965	11486	13642	1040	959	12606	12702	6826.66	1000	12654	12.657	3.662	0	0	0	0.0011	0.001	0.001	TRUE	NA
MGG_09079	1217	1231	10669	12335	1184	1223	11709	11485	6400.35	1204	11597	9.634	3.268	0	0	0	0.0011	0.001	0.001	TRUE	NA
MGG_09167	2104	2099	15948	18206	2048	2085	17503	16951	9646.75	2066	17227	8.336	3.059	0	0	0	0.0009	0.0008	0.0008	TRUE	NA
MGG_09260	129263	131312	41250	49685	125801	130461	45272	46260	86948.5	128131	45766	0.357	-1.485	0	0	0.0004	0.0005	0.0005	0.0005	TRUE	NA
MGG_09374	9885	9819	23851	27804	9620	9755	26177	25887	17859.9	9688	26032	2.687	1.426	0	0	0	0.0007	0.0006	0.0006	TRUE	NA
MGG_09395	20494	17358	543	656	19945	17246	596	611	9599.33	18596	604	0.032	-4.945	0	0	0.006	0.0009	0.0016	0.006	TRUE	NA
MGG_09412	2106	2101	68232	80677	2050	2087	74885	75116	38534.3	2068	75000	36.26	5.18	0	0	0	0.0006	0.0005	0.0005	TRUE	NA
MGG_09639	17424	15932	3511	3934	16957	15829	3853	3663	10075.5	16393	3758	0.229	-2.126	0	0	0.0015	0.0009	0.001	0.001	TRUE	NA
MGG_09817	15033	13302	2939	3428	14630	13216	3226	3192	8565.85	13923	3209	0.23	-2.118	0	0	0.0022	0.0009	0.0012	0.0012	TRUE	NA
MGG_09844	116	101	31603	35678	113	100	34684	33219	17029	106	33952	318.236	8.314	0	0	0	0.0007	0.0007	0.0007	TRUE	NA
MGG_09928	14645	14882	35705	42332	14253	14786	39186	39414	26909.6	14520	39300	2.707	1.437	0	0	0.0003	0.0006	0.0006	0.0006	TRUE	NA
MGG_09941	379	324	22682	25959	369	322	24894	24170	12438.5	346	24532	70.986	6.149	0	0	0.0006	0.0008	0.0008	0.0008	TRUE	NA
MGG_09998	54	49	14706	17517	53	49	16140	16309	8137.65	51	16224	320.42	8.324	0	0	0	0.001	0.0009	0.0009	TRUE	NA
MGG_10310	155	179	4621	5435	151	178	5072	5060	2615.15	164	5066	30.845	4.947	0	0	0	0.002	0.0018	0.0018	TRUE	NA
MGG_10327	1586	1544	15807	17777	1544	1534	17348	16552	9244.33	1539	16950	11.014	3.461	0	0	0	0.0009	0.0009	0.0009	TRUE	NA
MGG_10400	13495	12940	44900	51906	13134	12856	49278	48328	30898.9	12995	48803	3.755	1.909	0	0	0.0001	0.0006	0.0005	0.0005	TRUE	NA
MGG_10402	68	60	10047	11363	66	60	11027	10580	5433.03	63	10804	171.657	7.423	0	0	0	0.0012	0.0012	0.0012	TRUE	NA
MGG_10474	47	70	5027	6237	46	70	5517	5807	2859.87	58	5662	98.433	6.621	0	0	0.0021	0.0018	0.0018	0.0018	TRUE	NA
MGG_10487	176	149	5123	6234	171	148	5623	5804	2936.52	160	5714	35.768	5.161	0	0	0	0.0018	0.0017	0.0017	TRUE	NA
MGG_10598	230	264	3486	4174	224	262	3826	3886	2049.57	243	3856	15.874	3.989	0	0	0	0.0024	0.0022	0.0022	TRUE	NA
MGG_10736	2801	2621	10851	12830	2726	2604	11909	11946	7296.14	2665	11928	4.475	2.162	0	0	0	0.001	0.0009	0.0009	TRUE	NA
MGG_10969	18536	17987	4782	5658	18039	17870	5248	5268	11606.5	17954	5258	0.293	-1.772	0	0	0	0.0008	0.0007	0.0007	TRUE	NA
MGG_11021	1587	1617	6960	8370	1544	1607	7639	7793	4645.66	1576	7716	4.898	2.292	0	0	0	0.0013	0.0011	0.0011	TRUE	NA
MGG_11148	6667	6695	23129	27377	6488	6652	25384	25490	16003.5	6570	25437	3.872	1.953	0	0	0	0.0007	0.0006	0.0006	TRUE	NA
MGG_11259	59973	59784	15429	18602	58367	59397	16933	17320	38004.1	58882	17126	0.291	-1.781	0	0	0.0001	0.0006	0.0005	0.0005	TRUE	NA
MGG_11529	1490	1505	8146	9601	1450	1495	8940	8939	5206.19	1472	8940	6.071	2.602	0	0	0	0.0012	0.001	0.001	TRUE	NA
MGG_11608	1901	1627	391413	446620	1850	1616	429577	415832	212219	1733	422704	243.857	7.93	0	0	0.0042	0.0005	0.0008	0.0042	TRUE	NA
MGG_12175	37945	37768	8797	10691	36929	37523	9655	9954	23515.2	37226	9804	0.263	-1.925	0	0	0.0002	0.0007	0.0006	0.0006	TRUE	NA
MGG_12773	117	87	2854	3124	114	86	3132	2909	1560.31	100	3020	30.117	4.913	0	0	0.0058	0.003	0.0031	0.0031	TRUE	NA
MGG_12858	179	192	3525	3860	174	191	3869	3594	1956.89	182	3732	20.448	4.354	0	0	0	0.0025	0.0024	0.0024	TRUE	NA
MGG_13026	1323	1244	6849	7807	1288	1236	7517	7269	4327.28	1262	7393	5.858	2.55	0	0	0	0.0014	0.0012	0.0012	TRUE	NA
MGG_13239	36757	35696	93634	108575	35772	35465	102764	101090	68772.8	35618	101927	2.862	1.517	0	0	0	0.0006	0.0005	0.0005	TRUE	NA
MGG_13240	65	66	5673	6407	63	66	6226	5965	3080.08	64	6096	94.632	6.564	0	0	0	0.0017	0.0016	0.0016	TRUE	NA
MGG_13279	1051	1085	5384	6440	1023	1078	5909	5996	3501.46	1050	5952	5.668	2.503	0	0	0	0.0016	0.0014	0.0014	TRUE	NA
MGG_13326	928	840	6947	8229	903	835	7624	7662	4255.95	869	7643	8.795	3.137	0	0	0	0.0014	0.0013	0.0013	TRUE	NA
MGG_13463	39	27	8080	8912	38	27	8868	8298	4307.57	32	8583	264.478	8.047	0	0	0	0.0014	0.0015	0.0015	TRUE	NA
MGG_13464	105	78	16810	19215	102	77	18449	17890	9129.79	90	18170	201.963	7.658	0	0	0.0005	0.0009	0.0009	0.0009	TRUE	NA
MGG_13669	1033	1031	5220	6137	1005	1024	5729	5714	3368.14	1014	5722	5.638	2.495	0	0	0	0.0016	0.0014	0.0014	TRUE	NA
MGG_13986	8022	7606	26554	31638	7807	7557	29143	29457	18491	7682	29300	3.814	1.931	0	0	0.0001	0.0007	0.0006	0.0006	TRUE	NA
MGG_14010	1087	1068	26191	30872	1058	1061	28745	28744	14901.9	1060	28744	27.131	4.762	0	0	0	0.0008	0.0006	0.0006	TRUE	NA
MGG_14157	24012	21759	4602	5554	23369	21618	5051	5171	13802.2	22494	5111	0.227	-2.138	0	0	0.0014	0.0008	0.0009	0.0009	TRUE	NA
MGG_14302	249	214	4085	4743	242	213	4483	4416	2338.57	228	4450	19.551	4.289	0	0	0	0.0021	0.0019	0.0019	TRUE	NA
MGG_14340	6206	6104	32948	38645	6040	6064	36161	35981	21061.5	6052	36071	5.96	2.575	0	0	0	0.0007	0.0005	0.0005	TRUE	NA
MGG_14463	481	483	4395	5100	468	480	4824	4748	2629.99	474	4786	10.097	3.336	0	0	0	0.002	0.0017	0.0017	TRUE	NA
MGG_14715	16950	16175	82226	95209	16496	16070	90243	88646	52863.8	16283	89444	5.493	2.458	0	0	0.0002	0.0006	0.0005	0.0005	TRUE	NA
MGG_14966	3401	3368	148255	169344	3310	3346	162710	157670	81759.2	3328	160190	48.134	5.589	0	0	0.0003	0.0005	0.0005	0.0005	TRUE	NA
MGG_15100	58635	53967	5353	5898	57064	53617	5875	5491	30512	55340	5683	0.103	-3.284	0	0	0.0019	0.0006	0.0008	0.0008	TRUE	NA
MGG_15700	22024	20432	361020	414477	21434	20300	396221	385905	205965	20867	391063	18.74	4.228	0	0	0.0009	0.0005	0.0006	0.0006	TRUE	NA
MGG_15991	4156	4476	17066	20952	4045	4447	18730	19508	11682.3	4246	19119	4.504	2.171	0	0	0.0024	0.0008	0.001	0.001	TRUE	NA
MGG_16034	1584	1709	9197	10277	1542	1698	10094	9569	5725.45	1620	9832	6.07	2.602	0	0	0.0023	0.0012	0.0013	0.0013	TRUE	NA
MGG_16721	75	52	5950	6926	73	52	6530	6449	3275.84	62	6490	103.945	6.7	0	0	0	0.0017	0.0015	0.0015	TRUE	NA
MGG_16836	15617	14707	3088	3806	15199	14612	3389	3544	9185.78	14906	3466	0.233	-2.104	0	0	0.0005	0.0009	0.0009	0.0009	TRUE	NA
MGG_17215	3510	3375	14473	16465	3416	3353	15884	15330	9495.82	3384	15607	4.611	2.205	0	0	0.0004	0.0009	0.0008	0.0008	TRUE	NA
MGG_17513	17203	16874	5060	6027	16742	16765	5553	5612	11168	16754	5582	0.333	-1.585	0	0	0	0.0008	0.0007	0.0007	TRUE	NA
MGG_17677	101434	99250	38188	44649	98717	98607	41911	41571	70201.6	98662	41741	0.423	-1.241	0	0	0	0.0006	0.0004	0.0004	TRUE	NA
MGG_18118	133	113	11983	13462	129	112	13151	12534	6481.77	120	12842	106.184	6.73	0	0	0	0.0011	0.0011	0.0011	TRUE	NA
MGG_06364	270	298	2965	3620	263	296	3254	3370	1795.85	280	3312	11.86	3.568	9.34496e-308	5.43335e-306	0	0.0026	0.0024	0.0024	TRUE	NA
MGG_00306	1649	1532	6353	7499	1605	1522	6972	6982	4270.35	1564	6977	4.462	2.158	2.63225e-304	1.52243e-302	0	0.0014	0.0012	0.0012	TRUE	NA
MGG_06631	1158	1209	5479	6830	1127	1201	6013	6359	3675.14	1164	6186	5.316	2.41	3.56165e-303	2.04925e-301	0.0013	0.0015	0.0015	0.0015	TRUE	NA
MGG_00602	55264	55207	109548	130110	53784	54849	120229	121141	87500.8	54316	120685	2.222	1.152	5.77332e-302	3.30455e-300	0.0001	0.0005	0.0004	0.0004	TRUE	NA
MGG_05719	561515	559953	1064697	1263208	546474	556326	1168509	1176129	861859	551400	1172319	2.126	1.088	4.34484e-301	2.4741e-299	0.0001	0.0005	0.0004	0.0004	TRUE	NA
MGG_03034	45	36	3292	3885	44	36	3613	3617	1827.43	40	3615	90.789	6.504	1.25565e-300	7.1134e-299	0	0.0026	0.0023	0.0023	TRUE	NA
MGG_09321	9034	8996	2172	2462	8792	8938	2384	2292	5601.45	8865	2338	0.264	-1.923	6.70096e-300	3.77681e-298	0	0.0012	0.001	0.001	TRUE	NA
MGG_07850	5786	5112	732	857	5631	5079	803	798	3077.8	5355	800	0.149	-2.742	9.35977e-299	5.2486e-297	0.0029	0.0017	0.0019	0.0019	TRUE	NA
MGG_00703	5744	5479	811	1063	5590	5444	890	990	3228.36	5517	940	0.171	-2.551	9.81392e-299	5.47548e-297	0.0017	0.0017	0.0017	0.0017	TRUE	NA
MGG_09834	5715	5207	15570	18290	5562	5173	17088	17029	11213.1	5368	17058	3.178	1.668	3.85126e-295	2.13793e-293	0.0011	0.0008	0.0009	0.0009	TRUE	NA
MGG_03401	4111	3818	11911	13684	4001	3793	13072	12741	8401.8	3897	12906	3.311	1.727	6.72392e-294	3.71396e-292	0.0005	0.001	0.0009	0.0009	TRUE	NA
MGG_04934	136	169	2670	3003	132	168	2930	2796	1506.65	150	2863	19.083	4.254	4.76845e-293	2.62075e-291	0.0034	0.003	0.003	0.003	TRUE	NA
MGG_00099	19010	18090	5937	6864	18501	17973	6516	6391	12345.1	18237	6454	0.354	-1.499	6.27206e-291	3.43007e-289	0.0002	0.0008	0.0007	0.0007	TRUE	NA
MGG_04660	9489	9489	21844	25860	9235	9428	23974	24077	16678.4	9332	24026	2.575	1.364	3.17996e-290	1.73049e-288	0	0.0007	0.0006	0.0006	TRUE	NA
MGG_06251	596	638	4059	4519	580	634	4455	4207	2469.04	607	4331	7.136	2.835	6.67012e-289	3.612e-287	0.0016	0.002	0.002	0.002	TRUE	NA
MGG_07227	457	481	3359	4231	445	478	3687	3939	2137.12	462	3813	8.269	3.048	3.80898e-287	2.05258e-285	0	0.0023	0.0022	0.0022	TRUE	NA
MGG_03307	9591	9417	22590	25806	9334	9356	24793	24027	16877.4	9345	24410	2.612	1.385	7.36434e-287	3.94922e-285	0.0002	0.0007	0.0006	0.0006	TRUE	NA
MGG_11809	4372	3927	481	566	4255	3902	528	527	2302.83	4078	528	0.129	-2.951	2.90966e-283	1.5528e-281	0	0.0022	0.0022	0.0022	TRUE	NA
MGG_09010	11977	11816	26109	30503	11656	11739	28655	28400	20112.7	11698	28528	2.439	1.286	3.77103e-283	2.00282e-281	0	0.0007	0.0006	0.0006	TRUE	NA
MGG_02717	40	44	2913	3408	39	44	3197	3173	1613.19	42	3185	77.118	6.269	5.5756e-283	2.94706e-281	0	0.0029	0.0025	0.0025	TRUE	NA
MGG_01383	5800	5527	14364	16983	5645	5491	15765	15812	10678.2	5568	15788	2.836	1.504	5.92505e-283	3.11686e-281	0	0.0009	0.0007	0.0007	TRUE	NA
MGG_02284	3955	3675	12160	13527	3849	3651	13346	12595	8360.1	3750	12970	3.458	1.79	1.79258e-282	9.38512e-281	0.0012	0.001	0.001	0.001	TRUE	NA
MGG_12569	10243	9799	2674	3081	9969	9736	2935	2869	6376.87	9852	2902	0.294	-1.764	3.07435e-281	1.602e-279	0	0.0011	0.0009	0.0009	TRUE	NA
MGG_11561	19577	19116	6546	7510	19053	18992	7184	6992	13055.3	19022	7088	0.373	-1.424	7.82256e-280	4.05708e-278	0	0.0008	0.0007	0.0007	TRUE	NA
MGG_07193	3142	3174	10482	11546	3058	3153	11504	10750	7116.35	3106	11127	3.582	1.841	6.10096e-277	3.14941e-275	0.0013	0.001	0.0011	0.0011	TRUE	NA
MGG_11255	27646	29140	8671	10475	26905	28951	9516	9753	18781.5	27928	9634	0.345	-1.535	2.992e-274	1.53733e-272	0.0014	0.0007	0.0008	0.0008	TRUE	NA
MGG_15146	221	204	2471	2884	215	203	2712	2685	1453.72	209	2698	12.916	3.691	8.1984e-273	4.19295e-271	0	0.0031	0.0027	0.0027	TRUE	NA
MGG_17103	173757	163981	331104	384674	169103	162919	363388	358157	263391	166011	360772	2.173	1.12	2.12189e-268	1.08021e-266	0.0004	0.0005	0.0005	0.0005	TRUE	NA
MGG_10252	39612	37567	14459	16598	38551	37324	15869	15454	26799.3	37938	15662	0.413	-1.277	8.90203e-268	4.51104e-266	0.0003	0.0006	0.0006	0.0006	TRUE	NA
MGG_05069	102	85	2163	2637	99	84	2374	2455	1253.21	92	2414	26.273	4.716	2.47802e-266	1.24998e-264	0	0.0036	0.0032	0.0032	TRUE	NA
MGG_01494	733	782	4002	4687	713	777	4392	4364	2561.6	745	4378	5.876	2.555	4.45373e-266	2.23638e-264	0	0.002	0.0018	0.0018	TRUE	NA
MGG_04428	13554	13709	30443	37573	13191	13620	33411	34983	23801.3	13406	34197	2.551	1.351	7.12611e-265	3.56209e-263	0.0007	0.0007	0.0007	0.0007	TRUE	NA
MGG_05344	145053	144509	62052	73519	141168	143573	68102	68451	105323	142370	68276	0.48	-1.06	8.76531e-265	4.36173e-263	0.0001	0.0005	0.0004	0.0004	TRUE	NA
MGG_09352	12669	11474	3024	3349	12330	11400	3319	3118	7541.58	11865	3218	0.271	-1.883	1.81955e-264	9.0137e-263	0.0021	0.001	0.0012	0.0012	TRUE	NA
MGG_06359	524	469	3223	3807	510	466	3537	3545	2014.44	488	3541	7.255	2.859	4.07152e-261	2.00795e-259	0	0.0024	0.0021	0.0021	TRUE	NA
MGG_09189	78	78	2162	2502	76	77	2373	2330	1213.93	76	2352	30.653	4.938	4.49554e-261	2.20721e-259	0	0.0037	0.0032	0.0032	TRUE	NA
MGG_12936	14269	14440	30430	35892	13887	14346	33397	33418	23762	14116	33408	2.367	1.243	4.61303e-261	2.25488e-259	0.0002	0.0007	0.0006	0.0006	TRUE	NA
MGG_03299	2514	2455	123	169	2447	2439	135	157	1294.52	2443	146	0.06	-4.057	1.48569e-256	7.23013e-255	0	0.0035	0.0031	0.0031	TRUE	NA
MGG_08370	59423	55738	21677	24512	57831	55377	23791	22822	39955.3	56604	23306	0.412	-1.28	2.38914e-256	1.15758e-254	0.0008	0.0006	0.0006	0.0006	TRUE	NA
MGG_04430	2088	2009	6558	7810	2032	1996	7197	7272	4624.28	2014	7234	3.592	1.845	5.01119e-253	2.41741e-251	0	0.0013	0.0011	0.0011	TRUE	NA
MGG_11496	2646	2605	7812	9071	2575	2588	8574	8446	5545.66	2582	8510	3.296	1.721	5.96762e-253	2.86628e-251	0	0.0012	0.001	0.001	TRUE	NA
MGG_10118	3379	3320	9101	10866	3288	3298	9988	10117	6673.08	3293	10052	3.052	1.61	9.96101e-253	4.76361e-251	0	0.0011	0.0009	0.0009	TRUE	NA
MGG_09268	169	164	2232	2537	164	163	2450	2362	1284.79	164	2406	14.693	3.877	1.20876e-252	5.75567e-251	0	0.0035	0.0031	0.0031	TRUE	NA
MGG_01009	12830	12790	3939	4776	12486	12707	4323	4447	8490.83	12596	4385	0.348	-1.522	2.30427e-252	1.0925e-250	0	0.0009	0.0008	0.0008	TRUE	NA
MGG_02368	29330	26895	9074	10104	28544	26721	9959	9407	18657.8	27632	9683	0.35	-1.513	6.91697e-252	3.26546e-250	0.0018	0.0007	0.0009	0.0009	TRUE	NA
MGG_01229	7857	7696	17225	20442	7647	7646	18905	19033	13307.5	7646	18969	2.481	1.311	4.19874e-250	1.97377e-248	0	0.0008	0.0006	0.0006	TRUE	NA
MGG_15901	2435	2509	7571	8975	2370	2493	8309	8356	5382.01	2432	8332	3.428	1.777	1.0274e-249	4.80917e-248	0	0.0012	0.0011	0.0011	TRUE	NA
MGG_12009	1031	970	4296	5218	1003	964	4715	4858	2885.07	984	4786	4.867	2.283	1.25477e-249	5.8487e-248	0	0.0018	0.0016	0.0016	TRUE	NA
MGG_15577	9267	9304	20236	23954	9019	9244	22209	22303	15693.6	9132	22256	2.437	1.285	1.43127e-249	6.64338e-248	0	0.0007	0.0006	0.0006	TRUE	NA
MGG_05401	101	72	2155	2430	98	72	2365	2262	1199.36	85	2314	27.21	4.766	1.96489e-248	9.08206e-247	0.0011	0.0037	0.0036	0.0036	TRUE	NA
MGG_01150	2256	2082	7298	8240	2196	2069	8010	7672	4986.41	2132	7841	3.677	1.878	2.75463e-244	1.26793e-242	0.001	0.0013	0.0012	0.0012	TRUE	NA
MGG_06475	5434	5553	13429	15669	5288	5517	14738	14589	10033.2	5402	14664	2.714	1.44	1.16878e-240	5.35747e-239	0.0002	0.0009	0.0008	0.0008	TRUE	NA
MGG_08760	1396	1309	5000	6022	1359	1301	5488	5607	3438.38	1330	5548	4.172	2.061	2.64997e-240	1.20968e-238	0	0.0016	0.0014	0.0014	TRUE	NA
MGG_14575	2175	1876	7417	8683	2117	1864	8140	8084	5051.3	1990	8112	4.075	2.027	5.21882e-240	2.37252e-238	0.0034	0.0013	0.0015	0.0015	TRUE	NA
MGG_06011	15267	14217	4500	4973	14858	14125	4939	4630	9637.98	14492	4784	0.33	-1.599	6.75521e-239	3.05839e-237	0.0014	0.0009	0.001	0.001	TRUE	NA
MGG_03012	78	77	1906	2326	76	77	2092	2166	1102.48	76	2129	27.94	4.804	3.65003e-238	1.64579e-236	0	0.004	0.0035	0.0035	TRUE	NA
MGG_05421	1720	1766	5842	7079	1674	1755	6412	6591	4107.78	1714	6502	3.793	1.923	4.23916e-238	1.90366e-236	0.0003	0.0014	0.0013	0.0013	TRUE	NA
MGG_09571	6225	5907	1396	1610	6058	5869	1532	1499	3739.53	5964	1516	0.254	-1.977	7.5948e-238	3.39675e-236	0	0.0015	0.0013	0.0013	TRUE	NA
MGG_08501	2624	2338	160	170	2554	2323	176	158	1302.61	2438	167	0.068	-3.872	6.9088e-237	3.07748e-235	0	0.0034	0.0034	0.0034	TRUE	NA
MGG_09466	20341	19153	6948	7942	19796	19029	7625	7395	13461.3	19412	7510	0.387	-1.37	7.10835e-237	3.15365e-235	0.0004	0.0008	0.0007	0.0007	TRUE	NA
MGG_04913	21973	20678	7696	9004	21384	20544	8446	8383	14689.5	20964	8414	0.401	-1.317	4.61379e-236	2.03874e-234	0.0004	0.0008	0.0007	0.0007	TRUE	NA
MGG_05715	5513	5464	13332	15223	5365	5429	14632	14174	9899.86	5397	14403	2.668	1.416	4.71492e-236	2.07513e-234	0.0002	0.0009	0.0008	0.0008	TRUE	NA
MGG_09945	93	71	1928	2470	91	71	2116	2300	1144.19	81	2208	27.402	4.776	8.68885e-236	3.80896e-234	0.0042	0.0038	0.0039	0.0039	TRUE	NA
MGG_13654	19209	18668	37766	43347	18694	18547	41448	40359	29762.2	18620	40904	2.197	1.135	8.84328e-236	3.86133e-234	0.0001	0.0006	0.0005	0.0005	TRUE	NA
MGG_09818	5815	5112	855	866	5659	5079	938	806	3120.7	5369	872	0.162	-2.625	1.10972e-235	4.82639e-234	0.0073	0.0017	0.0024	0.0024	TRUE	NA
MGG_07697	16	24	4065	4603	16	24	4461	4286	2196.62	20	4374	222.342	7.797	1.79019e-235	7.75538e-234	0	0.0022	0.0021	0.0021	TRUE	NA
MGG_06955	304	316	2432	2953	296	314	2669	2749	1507.09	305	2709	8.888	3.152	9.11626e-235	3.93388e-233	0	0.003	0.0027	0.0027	TRUE	NA
MGG_13557	358	277	2735	3366	348	275	3002	3134	1689.81	312	3068	9.834	3.298	1.11932e-234	4.81135e-233	0.0107	0.0028	0.0031	0.0031	TRUE	NA
MGG_02777	96	115	2025	2266	93	114	2222	2110	1134.98	104	2166	20.87	4.383	1.61192e-234	6.90189e-233	0.0011	0.0039	0.0037	0.0037	TRUE	NA
MGG_10514	141	112	2120	2330	137	111	2327	2169	1186.15	124	2248	18.074	4.176	1.40146e-233	5.97759e-232	0.0036	0.0037	0.0037	0.0037	TRUE	NA
MGG_11786	2704	2569	7502	8968	2632	2552	8233	8350	5441.8	2592	8292	3.199	1.678	2.55108e-233	1.08392e-231	0	0.0012	0.001	0.001	TRUE	NA
MGG_09612	3758	3517	9801	12121	3657	3494	10757	11285	7298.41	3576	11021	3.082	1.624	2.72304e-233	1.15255e-231	0.0007	0.001	0.001	0.001	TRUE	NA
MGG_15601	22430	22586	43318	51100	21829	22440	47542	47577	34847	22134	47560	2.149	1.103	7.45074e-233	3.14154e-231	0.0001	0.0006	0.0005	0.0005	TRUE	NA
MGG_06691	7815	7756	2089	2325	7606	7706	2293	2165	4942.21	7656	2229	0.291	-1.781	2.83783e-232	1.192e-230	0.0003	0.0013	0.0011	0.0011	TRUE	NA
MGG_06648	3075	3227	8937	10845	2993	3206	9808	10097	6526.13	3100	9952	3.212	1.683	4.83244e-232	2.02212e-230	0.001	0.0011	0.0011	0.0011	TRUE	NA
MGG_01596	14357	14102	27871	33122	13972	14011	30589	30839	22352.6	13992	30714	2.195	1.134	5.91342e-231	2.46512e-229	0	0.0007	0.0005	0.0005	TRUE	NA
MGG_05767	44	57	1988	2330	43	57	2182	2169	1112.67	50	2176	43.804	5.453	1.10156e-228	4.57478e-227	0	0.0039	0.0036	0.0036	TRUE	NA
MGG_16668	11364	11628	3461	4212	11060	11553	3798	3922	7583.09	11306	3860	0.342	-1.55	2.21908e-227	9.18134e-226	0.0006	0.001	0.0009	0.0009	TRUE	NA
MGG_08494	58	35	2082	2365	56	35	2285	2202	1144.55	46	2244	49.078	5.617	5.04762e-226	2.08064e-224	0.0004	0.0038	0.0037	0.0037	TRUE	NA
MGG_00301	7859	7489	16631	19764	7648	7440	18253	18402	12935.8	7544	18328	2.429	1.28	5.54407e-226	2.27678e-224	0	0.0008	0.0007	0.0007	TRUE	NA
MGG_15277	11123	11290	23466	28499	10825	11217	25754	26534	18582.6	11021	26144	2.372	1.246	1.03502e-225	4.23475e-224	0.0004	0.0007	0.0007	0.0007	TRUE	NA
MGG_08774	63	42	1941	2301	61	42	2130	2142	1093.92	52	2136	41.399	5.372	3.3569e-225	1.3684e-223	0	0.004	0.0037	0.0037	TRUE	NA
MGG_01606	11061	10772	3156	3374	10765	10702	3464	3141	7018.02	10734	3302	0.307	-1.702	2.59168e-224	1.05258e-222	0.002	0.001	0.0012	0.0012	TRUE	NA
MGG_09354	5401	5379	1219	1368	5256	5344	1338	1274	3303.01	5300	1306	0.246	-2.022	3.65759e-224	1.48005e-222	0	0.0017	0.0014	0.0014	TRUE	NA
MGG_05952	20	14	4495	5021	19	14	4933	4675	2410.38	16	4804	287.359	8.167	4.64574e-223	1.87305e-221	0	0.0021	0.002	0.002	TRUE	NA
MGG_08831	29602	29187	11336	13883	28809	28998	12441	12926	20793.6	28904	12684	0.439	-1.188	8.82936e-223	3.54683e-221	0.0003	0.0007	0.0006	0.0006	TRUE	NA
MGG_05331	3551	3405	8880	10527	3456	3383	9746	9801	6596.5	3420	9774	2.858	1.515	4.11535e-222	1.64718e-220	0	0.0011	0.0009	0.0009	TRUE	NA
MGG_14574	2353	2337	6691	7969	2290	2322	7343	7420	4843.72	2306	7382	3.201	1.679	1.58609e-220	6.32548e-219	0	0.0013	0.0011	0.0011	TRUE	NA
MGG_06650	21867	20676	8011	9287	21281	20542	8792	8647	14815.6	20912	8720	0.417	-1.262	1.65021e-220	6.5575e-219	0.0003	0.0008	0.0007	0.0007	TRUE	NA
MGG_06449	160	171	1929	2315	156	170	2117	2155	1149.53	163	2136	13.127	3.714	6.45067e-220	2.55414e-218	0	0.0038	0.0034	0.0034	TRUE	NA
MGG_06700	870	782	3701	4532	847	777	4062	4220	2476.27	812	4141	5.101	2.351	1.11578e-219	4.40215e-218	0.0007	0.002	0.0019	0.0019	TRUE	NA
MGG_09645	12	18	5297	5775	12	18	5813	5377	2804.99	15	5595	379.236	8.567	9.35749e-219	3.67873e-217	0	0.0019	0.002	0.002	TRUE	NA
MGG_08158	4304	4357	845	939	4189	4329	927	874	2579.79	4259	900	0.211	-2.242	2.23805e-216	8.76727e-215	0	0.002	0.0018	0.0018	TRUE	NA
MGG_10533	14364	13266	4478	5341	13979	13180	4915	4973	9261.69	13580	4944	0.364	-1.458	1.02234e-214	3.99074e-213	0.0009	0.0009	0.0009	0.0009	TRUE	NA
MGG_01790	82819	81469	143981	166339	80601	80941	158020	154873	118608	80771	156446	1.937	0.954	4.7549e-214	1.84956e-212	0.0001	0.0005	0.0004	0.0004	TRUE	NA
MGG_10265	8089	7487	2097	2360	7872	7438	2301	2197	4952.4	7655	2249	0.294	-1.768	5.6028e-214	2.17172e-212	0.0011	0.0013	0.0013	0.0013	TRUE	NA
MGG_09131	4441	4192	10657	12248	4322	4165	11696	11404	7896.67	4244	11550	2.721	1.444	2.19127e-212	8.46397e-211	0.0003	0.001	0.0009	0.0009	TRUE	NA
MGG_07202	23333	21868	8509	10126	22708	21726	9339	9428	15800.2	22217	9384	0.422	-1.243	5.40885e-212	2.08193e-210	0.0004	0.0007	0.0007	0.0007	TRUE	NA
MGG_10961	32	48	2101	2251	31	48	2306	2096	1120.13	40	2201	55.918	5.805	9.93473e-212	3.81073e-210	0.0076	0.0039	0.0041	0.0041	TRUE	NA
MGG_00080	862	776	3960	4328	839	771	4346	4030	2496.41	805	4188	5.2	2.379	3.85468e-211	1.47345e-209	0.0025	0.002	0.0021	0.0021	TRUE	NA
MGG_16395	4419	4290	10196	12123	4301	4262	11190	11287	7760.07	4282	11238	2.625	1.392	6.49973e-211	2.47595e-209	0	0.001	0.0008	0.0008	TRUE	NA
MGG_13944	12218	12208	23917	28123	11891	12129	26249	26184	19113.2	12010	26216	2.183	1.126	9.20632e-211	3.49492e-209	0	0.0007	0.0006	0.0006	TRUE	NA
MGG_17679	28773	28588	12011	14047	28002	28403	13182	13079	20666.5	28202	13130	0.466	-1.103	2.84672e-209	1.07698e-207	0	0.0007	0.0006	0.0006	TRUE	NA
MGG_09701	3583	3579	9157	10456	3487	3556	10050	9735	6706.98	3522	9892	2.809	1.49	5.83021e-209	2.19817e-207	0	0.0011	0.0009	0.0009	TRUE	NA
MGG_04467	28184	26928	11251	13341	27429	26754	12348	12421	19738	27092	12384	0.457	-1.129	8.43075e-209	3.16784e-207	0.0001	0.0007	0.0006	0.0006	TRUE	NA
MGG_07790	178	164	1922	2167	173	163	2109	2018	1115.8	168	2064	12.271	3.617	2.27181e-207	8.50735e-206	0	0.0039	0.0035	0.0035	TRUE	NA
MGG_14057	265	343	15730	18791	258	341	17264	17496	8839.52	300	17380	58.074	5.86	3.10318e-207	1.15814e-205	0.0158	0.0009	0.0011	0.0158	TRUE	NA
MGG_07729	1597	1604	5104	6009	1554	1594	5602	5595	3586.07	1574	5598	3.557	1.831	7.44643e-207	2.76972e-205	0	0.0016	0.0013	0.0013	TRUE	NA
MGG_04861	9673	9546	3134	3690	9414	9484	3440	3436	6443.32	9449	3438	0.364	-1.459	6.25782e-206	2.3198e-204	0	0.0011	0.0009	0.0009	TRUE	NA
MGG_02378	55409	53196	24071	28596	53925	52851	26418	26625	39954.7	53388	26522	0.497	-1.009	6.41538e-206	2.37026e-204	0.0001	0.0006	0.0005	0.0005	TRUE	NA
MGG_04974	9975	10184	21366	26495	9708	10118	23449	24669	16985.9	9913	24059	2.427	1.279	5.31819e-205	1.95834e-203	0.0009	0.0007	0.0008	0.0008	TRUE	NA
MGG_04534	581	471	3391	3683	565	468	3722	3429	2046.03	516	3576	6.915	2.79	1.31474e-204	4.82521e-203	0.0084	0.0024	0.0029	0.0029	TRUE	NA
MGG_00346	1969	1914	117	135	1916	1902	128	126	1017.99	1909	127	0.067	-3.91	5.34336e-204	1.95457e-202	0	0.0043	0.0037	0.0037	TRUE	NA
MGG_01851	3710	3458	9378	10652	3611	3436	10292	9918	6814.08	3524	10105	2.868	1.52	3.06967e-203	1.11916e-201	0.0006	0.0011	0.001	0.001	TRUE	NA
MGG_06095	6003	6414	1454	1693	5842	6372	1596	1576	3846.68	6107	1586	0.26	-1.945	4.25147e-203	1.54494e-201	0.0019	0.0015	0.0016	0.0016	TRUE	NA
MGG_04030	1146	1268	4852	5477	1115	1260	5325	5099	3199.91	1188	5212	4.389	2.134	4.42953e-203	1.60436e-201	0.0031	0.0017	0.0019	0.0019	TRUE	NA
MGG_00830	3367	2951	9500	10732	3277	2932	10426	9992	6656.79	3104	10209	3.288	1.717	9.15612e-200	3.30548e-198	0.0031	0.0011	0.0013	0.0013	TRUE	NA
MGG_13192	15882	15614	5930	6691	15457	15513	6508	6230	10926.9	15485	6369	0.411	-1.282	2.07498e-199	7.46656e-198	0.0003	0.0008	0.0008	0.0008	TRUE	NA
MGG_11861	97469	97220	163427	194354	94858	96590	179362	180956	137942	95724	180159	1.882	0.912	7.07126e-199	2.53624e-197	0.0001	0.0005	0.0004	0.0004	TRUE	NA
MGG_06156	40	28	1867	2205	39	28	2049	2053	1042.2	34	2051	61.363	5.939	8.1234e-199	2.90418e-197	0	0.0042	0.0038	0.0038	TRUE	NA
MGG_02836	12138	11448	4063	4760	11813	11374	4459	4432	8019.43	11594	4446	0.383	-1.383	1.32951e-198	4.73777e-197	0.0003	0.001	0.0009	0.0009	TRUE	NA
MGG_07973	14905	14234	5405	6183	14506	14142	5932	5757	10084.1	14324	5844	0.408	-1.294	2.1264e-197	7.55316e-196	0.0003	0.0009	0.0008	0.0008	TRUE	NA
MGG_07559	3648	3469	628	771	3550	3447	689	718	2100.97	3498	704	0.201	-2.313	6.68713e-197	2.36771e-195	0	0.0023	0.002	0.002	TRUE	NA
MGG_02259	1354	1234	4595	5256	1318	1226	5043	4894	3120.11	1272	4968	3.905	1.965	2.76854e-195	9.77128e-194	0.0005	0.0017	0.0016	0.0016	TRUE	NA
MGG_12523	48200	42997	7271	7954	46909	42718	7980	7406	26253.2	44814	7693	0.172	-2.543	8.55293e-195	3.00905e-193	0.0034	0.0006	0.0011	0.0034	TRUE	NA
MGG_04659	4643	4471	10527	12096	4519	4442	11553	11262	7944.06	4480	11408	2.546	1.348	6.95029e-194	2.43746e-192	0	0.001	0.0008	0.0008	TRUE	NA
MGG_08360	1984	1735	79	91	1931	1724	87	85	956.51	1828	86	0.047	-4.415	3.0418e-193	1.06338e-191	0	0.0045	0.0045	0.0045	TRUE	NA
MGG_01282	28038	28761	52358	62894	27287	28575	57463	58558	42970.8	27931	58010	2.077	1.055	5.60436e-192	1.95304e-190	0.0006	0.0006	0.0006	0.0006	TRUE	NA
MGG_14061	10771	9886	3284	3762	10482	9822	3604	3503	6852.83	10152	3554	0.35	-1.515	9.72113e-191	3.37702e-189	0.0012	0.0011	0.0011	0.0011	TRUE	NA
MGG_08003	29	23	1998	2397	28	23	2193	2232	1118.91	26	2212	86.551	6.435	2.08118e-190	7.20715e-189	0	0.0039	0.0035	0.0035	TRUE	NA
MGG_06473	123	135	1616	1967	120	134	1774	1831	964.7	127	1802	14.21	3.829	2.55258e-190	8.81198e-189	0	0.0045	0.004	0.004	TRUE	NA
MGG_00604	34060	32461	14410	17052	33148	32251	15815	15877	24272.5	32700	15846	0.485	-1.045	1.00335e-189	3.45297e-188	0.0002	0.0007	0.0006	0.0006	TRUE	NA
MGG_03329	432201	453865	849553	1046616	420624	450925	932388	974468	694601	435774	953428	2.188	1.13	1.4242e-189	4.88608e-188	0.0017	0.0005	0.0007	0.0007	TRUE	NA
MGG_11606	343	333	2156	2555	334	331	2366	2379	1352.44	332	2372	7.139	2.836	1.74193e-188	5.95763e-187	0	0.0033	0.0028	0.0028	TRUE	NA
MGG_01243	1545	1604	4917	5769	1504	1594	5396	5371	3466.24	1549	5384	3.477	1.798	5.78303e-187	1.97176e-185	0	0.0016	0.0014	0.0014	TRUE	NA
MGG_14348	12168	11809	4268	5197	11842	11732	4684	4839	8274.36	11787	4762	0.404	-1.307	2.22328e-186	7.55711e-185	0	0.001	0.0008	0.0008	TRUE	NA
MGG_03945	22919	22062	9309	10537	22305	21919	10217	9811	16062.9	22112	10014	0.453	-1.143	1.02601e-184	3.47678e-183	0.0003	0.0007	0.0007	0.0007	TRUE	NA
MGG_07704	3344	3257	8069	9264	3254	3236	8856	8625	5992.87	3245	8740	2.693	1.429	1.18483e-184	4.00271e-183	0	0.0011	0.001	0.001	TRUE	NA
MGG_14592	1602	1481	4787	5676	1559	1471	5254	5285	3392.24	1515	5270	3.477	1.798	3.76158e-184	1.2669e-182	0	0.0016	0.0014	0.0014	TRUE	NA
MGG_14886	4498	4346	1041	1232	4378	4318	1143	1147	2746.23	4348	1145	0.263	-1.925	8.05889e-184	2.70597e-182	0	0.0019	0.0016	0.0016	TRUE	NA
MGG_07604	2487	2335	6853	7645	2420	2320	7521	7118	4844.86	2370	7320	3.087	1.626	1.8164e-183	6.08053e-182	0.001	0.0013	0.0012	0.0012	TRUE	NA
MGG_04927	6677	6451	13897	15828	6498	6409	15252	14737	10724.1	6454	14994	2.323	1.216	5.21973e-181	1.74207e-179	0.0003	0.0009	0.0008	0.0008	TRUE	NA
MGG_06476	7786	7900	15927	18505	7577	7849	17480	17229	12533.9	7713	17354	2.25	1.17	6.79345e-181	2.26046e-179	0.0002	0.0008	0.0007	0.0007	TRUE	NA
MGG_16812	11	16	3682	4069	11	16	4041	3789	1964.03	14	3915	294.823	8.204	8.41417e-180	2.79133e-178	0	0.0024	0.0024	0.0024	TRUE	NA
MGG_07791	65326	59440	128993	144079	63576	59055	141570	134147	99587.1	61316	137858	2.248	1.169	8.61853e-180	2.85056e-178	0.0021	0.0005	0.0008	0.0008	TRUE	NA
MGG_17962	9149	8723	3030	3499	8904	8666	3325	3258	6038.41	8785	3292	0.375	-1.417	1.10713e-179	3.65088e-178	0	0.0011	0.001	0.001	TRUE	NA
MGG_08173	10967	10592	3941	4651	10673	10523	4325	4330	7463.07	10598	4328	0.408	-1.292	8.12042e-178	2.66983e-176	0	0.001	0.0008	0.0008	TRUE	NA
MGG_09361	4458	4048	10292	11856	4339	4022	11296	11039	7673.65	4180	11168	2.671	1.417	5.50651e-177	1.80506e-175	0.0012	0.001	0.001	0.001	TRUE	NA
MGG_10781	25	19	1975	2379	24	19	2168	2215	1106.45	22	2192	101.319	6.663	6.11878e-177	1.99983e-175	0	0.004	0.0036	0.0036	TRUE	NA
MGG_05456	1302	1117	5049	5364	1267	1110	5541	4994	3228.1	1188	5268	4.43	2.147	1.05691e-174	3.44414e-173	0.006	0.0017	0.0023	0.0023	TRUE	NA
MGG_03736	3982	4005	914	1028	3875	3979	1003	957	2453.66	3927	980	0.249	-2.003	1.98528e-174	6.45041e-173	0	0.0021	0.0018	0.0018	TRUE	NA
MGG_04696	50910	48648	23302	27372	49546	48333	25574	25485	37234.6	48940	25530	0.522	-0.939	3.81622e-173	1.2363e-171	0.0001	0.0006	0.0005	0.0005	TRUE	NA
MGG_04070	302	273	1940	2515	294	271	2129	2342	1258.98	282	2236	7.913	2.984	6.558e-173	2.11831e-171	0	0.0035	0.0035	0.0035	TRUE	NA
MGG_14629	629	526	2816	3364	612	523	3091	3132	1839.35	568	3112	5.482	2.455	1.2198e-172	3.9286e-171	0.0042	0.0026	0.0027	0.0027	TRUE	NA
MGG_09110	4921	4588	10387	12261	4789	4558	11400	11416	8040.76	4674	11408	2.441	1.287	2.64796e-170	8.50348e-169	0.0003	0.001	0.0009	0.0009	TRUE	NA
MGG_16961	227	181	1743	2153	221	180	1913	2005	1079.57	200	1959	9.772	3.289	4.88811e-170	1.56519e-168	0.0035	0.004	0.004	0.004	TRUE	NA
MGG_15429	3837	3726	8652	9917	3734	3702	9496	9233	6541.27	3718	9364	2.518	1.332	9.12316e-170	2.91282e-168	0	0.0011	0.0009	0.0009	TRUE	NA
MGG_07657	2693	2498	6584	7758	2621	2482	7226	7223	4887.96	2552	7224	2.831	1.502	1.18487e-169	3.77212e-168	0.0002	0.0013	0.0011	0.0011	TRUE	NA
MGG_06668	11163	10807	20027	23700	10864	10737	21980	22066	16411.7	10800	22023	2.039	1.028	1.6834e-169	5.34383e-168	0	0.0007	0.0006	0.0006	TRUE	NA
MGG_11779	525	501	2512	2845	511	498	2757	2649	1603.63	504	2703	5.358	2.422	2.65215e-169	8.39492e-168	0	0.0029	0.0025	0.0025	TRUE	NA
MGG_00822	41	22	11264	12179	40	22	12362	11339	5940.87	31	11850	383.179	8.582	6.67643e-169	2.10727e-167	0.0302	0.0011	0.0014	0.0302	TRUE	NA
MGG_17961	1037	1116	3762	4505	1009	1109	4129	4194	2610.31	1059	4162	3.931	1.975	1.13445e-168	3.57044e-167	0.0011	0.002	0.0019	0.0019	TRUE	NA
MGG_02157	2819	2710	6662	8080	2743	2692	7312	7523	5067.63	2718	7418	2.729	1.449	6.57082e-168	2.06216e-166	0	0.0013	0.0011	0.0011	TRUE	NA
MGG_00710	3012	2993	567	670	2931	2974	622	624	1787.76	2952	623	0.211	-2.244	5.9716e-167	1.86879e-165	0	0.0026	0.0022	0.0022	TRUE	NA
MGG_01086	1371	1228	4501	4997	1334	1220	4940	4653	3036.68	1277	4796	3.754	1.908	1.01072e-166	3.15407e-165	0.0019	0.0018	0.0018	0.0018	TRUE	NA
MGG_09165	128	149	1573	1751	125	148	1726	1630	907.32	136	1678	12.317	3.623	3.1395e-166	9.76961e-165	0.0013	0.0047	0.0044	0.0044	TRUE	NA
MGG_13499	6280	5766	1715	1979	6112	5729	1882	1843	3891.31	5920	1862	0.314	-1.669	3.37371e-166	1.04689e-164	0.0011	0.0015	0.0014	0.0014	TRUE	NA
MGG_03141	2472	2303	6220	7173	2406	2288	6826	6679	4549.72	2347	6752	2.877	1.524	6.59837e-166	2.0418e-164	0.0003	0.0013	0.0012	0.0012	TRUE	NA
MGG_10330	9483	9108	3311	3722	9229	9049	3634	3465	6344.31	9139	3550	0.388	-1.365	6.7219e-166	2.07421e-164	0.0003	0.0011	0.001	0.001	TRUE	NA
MGG_03416	7813	7677	2418	3045	7604	7627	2654	2835	5179.96	7616	2744	0.361	-1.471	1.54577e-163	4.75659e-162	0.0006	0.0012	0.0012	0.0012	TRUE	NA
MGG_17528	694	666	2733	3388	675	662	2999	3154	1872.76	668	3076	4.603	2.203	2.03109e-163	6.23262e-162	0	0.0025	0.0022	0.0022	TRUE	NA
MGG_01662	35713	33869	15234	17003	34756	33650	16719	15831	25239.1	34203	16275	0.476	-1.072	4.29373e-163	1.31393e-161	0.0009	0.0006	0.0007	0.0007	TRUE	NA
MGG_16060	12	16	2573	3240	12	16	2824	3017	1467.03	14	2920	212.187	7.729	1.31652e-162	4.01758e-161	0	0.0031	0.003	0.003	TRUE	NA
MGG_02074	378	382	2131	2412	368	380	2339	2246	1332.98	374	2292	6.133	2.617	2.27935e-162	6.93664e-161	0	0.0034	0.0029	0.0029	TRUE	NA
MGG_00633	11445	11694	21408	25763	11138	11618	23495	23987	17559.8	11378	23741	2.087	1.061	5.74649e-162	1.744e-160	0.0004	0.0007	0.0007	0.0007	TRUE	NA
MGG_15018	2214	2070	5684	6553	2155	2057	6238	6101	4137.69	2106	6170	2.93	1.551	5.77516e-162	1.74789e-160	0.0002	0.0014	0.0013	0.0013	TRUE	NA
MGG_11513	22443	21824	9892	11417	21842	21683	10857	10630	16252.7	21762	10744	0.494	-1.019	6.98846e-162	2.10933e-160	0	0.0007	0.0006	0.0006	TRUE	NA
MGG_07231	241	242	1784	1997	235	240	1958	1859	1073.07	238	1908	8.035	3.006	8.61197e-162	2.59227e-160	0	0.0041	0.0036	0.0036	TRUE	NA
MGG_03070	3539	3440	785	904	3444	3418	862	842	2141.29	3431	852	0.248	-2.011	2.29942e-161	6.90264e-160	0	0.0023	0.0019	0.0019	TRUE	NA
MGG_15138	2392	2249	5835	6961	2328	2234	6404	6481	4361.86	2281	6442	2.824	1.498	1.85606e-160	5.55662e-159	0	0.0014	0.0012	0.0012	TRUE	NA
MGG_15732	429	442	2197	2575	418	439	2411	2397	1416.34	428	2404	5.614	2.489	3.08177e-160	9.20117e-159	0	0.0032	0.0027	0.0027	TRUE	NA
MGG_16194	347	295	2139	2323	338	293	2348	2163	1285.3	316	2256	7.145	2.837	3.11733e-160	9.28224e-159	0.004	0.0035	0.0035	0.0035	TRUE	NA
MGG_05695	185	221	1697	1962	180	220	1862	1827	1022.21	200	1844	9.236	3.207	1.19934e-159	3.5616e-158	0	0.0042	0.0041	0.0041	TRUE	NA
MGG_17084	78	97	1329	1567	76	96	1459	1459	772.46	86	1459	16.949	4.083	3.54215e-159	1.04907e-157	0	0.0055	0.005	0.005	TRUE	NA
MGG_10189	21465	22008	8708	10721	20890	21865	9557	9982	15573.6	21378	9770	0.457	-1.129	3.67449e-159	1.08535e-157	0.0008	0.0007	0.0008	0.0008	TRUE	NA
MGG_05988	29609	28801	13682	16097	28816	28614	15016	14987	21858.4	28715	15002	0.522	-0.937	7.27824e-158	2.14407e-156	0	0.0007	0.0005	0.0005	TRUE	NA
MGG_09829	24	23	1566	1843	23	23	1719	1716	870.21	23	1718	74.322	6.216	8.01832e-158	2.35581e-156	0	0.0049	0.0043	0.0043	TRUE	NA
MGG_04719	23860	23551	10776	12762	23221	23398	11827	11882	17582.1	23310	11854	0.509	-0.975	9.37283e-158	2.74646e-156	0	0.0007	0.0006	0.0006	TRUE	NA
MGG_04503	4235	4300	1042	1098	4122	4272	1144	1022	2639.9	4197	1083	0.258	-1.956	1.04388e-157	3.05074e-156	0.0023	0.0019	0.002	0.002	TRUE	NA
MGG_14937	9668	9078	3389	3911	9409	9019	3719	3641	6447.26	9214	3680	0.399	-1.324	1.13528e-157	3.30909e-156	0.0005	0.0011	0.001	0.001	TRUE	NA
MGG_03089	39030	37579	61885	72813	37985	37336	67919	67794	52758.2	37660	67856	1.802	0.849	1.9197e-157	5.58077e-156	0	0.0006	0.0005	0.0005	TRUE	NA
MGG_03494	13559	13198	5421	6110	13196	13113	5950	5689	9486.67	13154	5820	0.442	-1.177	1.99715e-157	5.79068e-156	0.0003	0.0009	0.0008	0.0008	TRUE	NA
MGG_08309	5335	5090	1462	1576	5192	5057	1605	1467	3330.26	5124	1536	0.299	-1.74	2.33953e-157	6.76567e-156	0.0013	0.0016	0.0016	0.0016	TRUE	NA
MGG_05967	2242	2091	5539	6646	2182	2077	6079	6188	4131.58	2130	6134	2.88	1.526	4.6736e-157	1.34802e-155	0.0001	0.0014	0.0013	0.0013	TRUE	NA
MGG_09188	709	729	2771	3340	690	724	3041	3110	1891.31	707	3076	4.35	2.121	5.71505e-157	1.64412e-155	0	0.0025	0.0022	0.0022	TRUE	NA
MGG_05766	3546	3530	7770	9189	3451	3507	8528	8556	6010.33	3479	8542	2.455	1.296	6.84112e-157	1.96296e-155	0	0.0011	0.0009	0.0009	TRUE	NA
MGG_13936	6345	6392	12484	14615	6175	6351	13701	13608	9958.6	6263	13654	2.18	1.124	1.33719e-155	3.82692e-154	0	0.0009	0.0007	0.0007	TRUE	NA
MGG_01327	3652	3764	817	1018	3554	3740	897	948	2284.57	3647	922	0.253	-1.982	1.55646e-155	4.44294e-154	0.0009	0.0022	0.002	0.002	TRUE	NA
MGG_00787	155	141	1447	1667	151	140	1588	1552	857.78	146	1570	10.79	3.432	1.75104e-155	4.9855e-154	0	0.005	0.0043	0.0043	TRUE	NA
MGG_03375	5635	5110	1448	1580	5484	5077	1589	1471	3405.31	5280	1530	0.29	-1.788	4.11549e-155	1.16874e-153	0.0026	0.0016	0.0018	0.0018	TRUE	NA
MGG_07215	41	57	1228	1543	40	57	1348	1437	720.23	48	1392	28.893	4.853	2.65922e-154	7.5324e-153	0.0017	0.0058	0.0056	0.0056	TRUE	NA
MGG_04237	2852	2815	6518	7794	2776	2797	7154	7257	4995.66	2786	7206	2.586	1.371	2.79341e-154	7.89228e-153	0	0.0013	0.001	0.001	TRUE	NA
MGG_03724	6056	6285	12519	15060	5894	6244	13740	14022	9974.89	6069	13881	2.287	1.194	2.86332e-154	8.06916e-153	0.0007	0.0009	0.0009	0.0009	TRUE	NA
MGG_11680	204	192	1550	1815	199	191	1701	1690	945.08	195	1696	8.709	3.123	8.40112e-154	2.36151e-152	0	0.0046	0.0039	0.0039	TRUE	NA
MGG_10570	6317	6172	12020	14536	6148	6132	13192	13534	9751.44	6140	13363	2.177	1.122	1.24289e-153	3.48481e-152	0	0.0009	0.0007	0.0007	TRUE	NA
MGG_00771	4123	4068	1076	1211	4013	4042	1181	1128	2590.66	4028	1154	0.286	-1.804	5.24776e-153	1.46764e-151	0	0.002	0.0017	0.0017	TRUE	NA
MGG_09743	28884	28422	12261	15264	28110	28238	13456	14212	21004.1	28174	13834	0.491	-1.026	1.12711e-152	3.14425e-151	0.0006	0.0007	0.0007	0.0007	TRUE	NA
MGG_00223	25040	23946	10953	13178	24369	23791	12021	12270	18112.7	24080	12146	0.504	-0.987	1.17437e-152	3.26783e-151	0.0001	0.0007	0.0006	0.0006	TRUE	NA
MGG_06081	3676	3737	899	1050	3578	3713	987	978	2313.65	3646	982	0.269	-1.892	9.16029e-152	2.54256e-150	0	0.0022	0.0018	0.0018	TRUE	NA
MGG_03764	1695	1543	100	152	1650	1533	110	142	858.47	1592	126	0.079	-3.654	1.10836e-151	3.06869e-150	0.0061	0.005	0.005	0.005	TRUE	NA
MGG_10916	3230	3043	673	783	3143	3023	739	729	1908.6	3083	734	0.238	-2.071	3.23755e-151	8.94131e-150	0	0.0025	0.0022	0.0022	TRUE	NA
MGG_01148	1729	1621	4587	5349	1683	1610	5034	4980	3326.93	1646	5007	3.041	1.604	4.4793e-150	1.23399e-148	0	0.0016	0.0014	0.0014	TRUE	NA
MGG_09488	1070	1031	3357	3948	1041	1024	3684	3676	2356.46	1032	3680	3.563	1.833	1.08888e-149	2.99227e-148	0	0.0021	0.0018	0.0018	TRUE	NA
MGG_05012	75	71	1198	1410	73	71	1315	1313	692.79	72	1314	18.304	4.194	1.64681e-149	4.51423e-148	0	0.006	0.0052	0.0052	TRUE	NA
MGG_15353	3325	3206	742	815	3236	3185	814	759	1998.58	3210	786	0.245	-2.031	3.42843e-149	9.37471e-148	0	0.0024	0.0021	0.0021	TRUE	NA
MGG_06750	100	87	1226	1508	97	86	1346	1404	733.34	92	1375	14.96	3.903	3.7048e-149	1.01054e-147	0	0.0057	0.0051	0.0051	TRUE	NA
MGG_09063	3079	3114	668	729	2997	3094	733	679	1875.56	3046	706	0.232	-2.111	6.45036e-149	1.7551e-147	0	0.0025	0.0023	0.0023	TRUE	NA
MGG_01729	5265	5374	10656	12766	5124	5339	11695	11886	8511.03	5232	11790	2.254	1.172	1.48892e-148	4.0413e-147	0.0002	0.0009	0.0008	0.0008	TRUE	NA
MGG_05232	73547	71052	114434	132231	71577	70592	125592	123116	97719	71084	124354	1.749	0.807	2.01663e-148	5.46021e-147	0.0001	0.0005	0.0005	0.0005	TRUE	NA
MGG_06865	315	283	1757	2155	307	281	1928	2006	1130.62	294	1967	6.695	2.743	7.21359e-148	1.94837e-146	0	0.0039	0.0035	0.0035	TRUE	NA
MGG_00865	9683	9800	17888	22021	9424	9737	19632	20503	14823.8	9580	20068	2.095	1.067	1.90119e-147	5.12254e-146	0.0006	0.0008	0.0007	0.0007	TRUE	NA
MGG_07603	9488	8708	20885	22417	9234	8652	22921	20872	15419.6	8943	21896	2.448	1.292	5.25053e-147	1.41126e-145	0.0031	0.0007	0.0011	0.0011	TRUE	NA
MGG_05525	6495	6387	12106	14453	6321	6346	13286	13457	9852.43	6334	13372	2.111	1.078	5.4392e-147	1.45842e-145	0	0.0009	0.0007	0.0007	TRUE	NA
MGG_10547	53	51	1148	1379	52	51	1260	1284	661.53	52	1272	24.88	4.637	7.9896e-147	2.13707e-145	0	0.0063	0.0055	0.0055	TRUE	NA
MGG_08795	4911	4562	9925	11549	4779	4532	10893	10753	7739.37	4656	10823	2.324	1.217	9.3534e-147	2.49582e-145	0.0004	0.001	0.0009	0.0009	TRUE	NA
MGG_12468	8243	8446	15953	19773	8022	8391	17508	18410	13083	8206	17959	2.189	1.13	1.05974e-146	2.82094e-145	0.001	0.0008	0.0008	0.0008	TRUE	NA
MGG_00179	13689	13653	23222	27655	13322	13565	25486	25749	19530.4	13444	25618	1.906	0.93	1.05931e-145	2.81302e-144	0	0.0007	0.0006	0.0006	TRUE	NA
MGG_16853	835	844	3011	3406	813	839	3305	3171	2031.74	826	3238	3.921	1.971	1.42237e-145	3.7681e-144	0	0.0024	0.0021	0.0021	TRUE	NA
MGG_05133	4792	4602	9549	11061	4664	4572	10480	10299	7503.6	4618	10390	2.25	1.17	7.03529e-145	1.8593e-143	0	0.001	0.0008	0.0008	TRUE	NA
MGG_08152	2706	2590	6238	7164	2634	2573	6846	6670	4680.78	2604	6758	2.596	1.376	1.23225e-144	3.24885e-143	0	0.0013	0.0011	0.0011	TRUE	NA
MGG_05880	116782	106014	200168	230085	113654	105327	219685	214224	163223	109490	216954	1.981	0.987	1.40667e-144	3.69988e-143	0.0016	0.0005	0.0007	0.0007	TRUE	NA
MGG_04469	1928	1926	5029	5723	1876	1914	5519	5328	3659.43	1895	5424	2.862	1.517	1.65111e-144	4.33249e-143	0	0.0015	0.0013	0.0013	TRUE	NA
MGG_01157	1046	1209	3958	4658	1018	1201	4344	4337	2724.99	1110	4340	3.913	1.968	3.75075e-144	9.81861e-143	0.0057	0.0019	0.0023	0.0023	TRUE	NA
MGG_03333	4435	4506	9204	10749	4316	4477	10101	10008	7225.61	4396	10054	2.287	1.193	6.29365e-144	1.64364e-142	0.0001	0.001	0.0009	0.0009	TRUE	NA
MGG_08549	148	113	1431	1572	144	112	1571	1464	822.62	128	1518	11.825	3.564	7.25022e-144	1.88899e-142	0.0058	0.0052	0.0052	0.0052	TRUE	NA
MGG_04533	359	317	2014	2179	349	315	2210	2029	1225.87	332	2120	6.377	2.673	7.97847e-144	2.07384e-142	0.003	0.0036	0.0035	0.0035	TRUE	NA
MGG_02582	236	193	1598	1845	230	192	1754	1718	973.26	211	1736	8.233	3.041	8.24832e-144	2.13895e-142	0	0.0044	0.0042	0.0042	TRUE	NA
MGG_03641	309544	298176	160238	184651	301252	296244	175862	171922	236320	298748	173892	0.582	-0.781	2.84204e-143	7.35271e-142	0.0002	0.0005	0.0004	0.0004	TRUE	NA
MGG_00756	926	896	3042	3525	901	890	3339	3282	2103	896	3310	3.695	1.886	1.0464e-142	2.70084e-141	0	0.0023	0.0019	0.0019	TRUE	NA
MGG_13347	549	489	2257	2847	534	486	2477	2651	1536.98	510	2564	5.027	2.33	2.22398e-142	5.72689e-141	0.0021	0.003	0.0029	0.0029	TRUE	NA
MGG_02850	17	8	2304	2583	17	8	2529	2405	1239.52	12	2467	200.687	7.649	2.66833e-142	6.85513e-141	0.0009	0.0036	0.0034	0.0034	TRUE	NA
MGG_04674	4594	4376	9199	10628	4471	4348	10096	9895	7202.47	4410	9996	2.267	1.181	1.84722e-141	4.73463e-140	0	0.001	0.0009	0.0009	TRUE	NA
MGG_05661	31242	31610	14966	17642	30405	31405	16425	16426	23665.4	30905	16426	0.531	-0.912	5.08706e-141	1.29785e-139	0.0002	0.0007	0.0006	0.0006	TRUE	NA
MGG_09512	4456	4504	9058	10669	4337	4475	9941	9934	7171.55	4406	9938	2.256	1.174	5.08364e-141	1.29785e-139	0	0.001	0.0009	0.0009	TRUE	NA
MGG_10104	1171	1256	4105	4455	1140	1248	4505	4148	2760.16	1194	4326	3.624	1.857	6.71082e-141	1.70817e-139	0.0032	0.0019	0.0021	0.0021	TRUE	NA
MGG_10024	557	577	2758	2850	542	573	3027	2654	1698.95	558	2840	5.091	2.348	7.67715e-141	1.94964e-139	0.005	0.0028	0.0031	0.0031	TRUE	NA
MGG_00532	2227	2177	5554	6233	2167	2163	6096	5803	4057.28	2165	5950	2.747	1.458	9.17427e-141	2.3245e-139	0	0.0014	0.0013	0.0013	TRUE	NA
MGG_01393	40	52	1101	1406	39	52	1208	1309	652.01	46	1258	27.831	4.799	1.00017e-140	2.52835e-139	0	0.0064	0.0061	0.0061	TRUE	NA
MGG_16141	81	77	1154	1310	79	77	1267	1220	660.39	78	1244	16.001	4	1.55201e-138	3.91439e-137	0	0.0063	0.0055	0.0055	TRUE	NA
MGG_03464	51081	51951	25360	29904	49713	51614	27833	27843	39250.6	50664	27838	0.549	-0.864	3.14842e-138	7.92268e-137	0.0003	0.0006	0.0005	0.0005	TRUE	NA
MGG_07048	12783	12494	5383	6088	12441	12413	5908	5668	9107.46	12427	5788	0.466	-1.103	6.85803e-138	1.72183e-136	0.0002	0.0009	0.0008	0.0008	TRUE	NA
MGG_06850	2393	2377	5590	7010	2329	2362	6135	6527	4338.08	2346	6331	2.7	1.433	1.55448e-136	3.89394e-135	0.0009	0.0014	0.0013	0.0013	TRUE	NA
MGG_15887	12	14	1972	2243	12	14	2164	2088	1069.56	13	2126	166.313	7.378	3.57641e-136	8.9386e-135	0	0.0041	0.0037	0.0037	TRUE	NA
MGG_11412	16270	16008	7354	8579	15834	15904	8071	7988	11949.3	15869	8030	0.506	-0.983	1.53886e-135	3.83742e-134	0	0.0008	0.0007	0.0007	TRUE	NA
MGG_06492	1714	1601	4479	5077	1668	1591	4916	4727	3225.36	1630	4822	2.958	1.565	7.90972e-135	1.96799e-133	0.0005	0.0017	0.0015	0.0015	TRUE	NA
MGG_01925	5328	4960	10248	11937	5185	4928	11247	11114	8118.62	5056	11180	2.211	1.145	1.11156e-134	2.75941e-133	0.0004	0.001	0.0009	0.0009	TRUE	NA
MGG_09477	5109	5041	9966	11437	4972	5008	10938	10649	7891.7	4990	10794	2.163	1.113	1.61297e-134	3.99519e-133	0	0.001	0.0008	0.0008	TRUE	NA
MGG_03539	1231	1373	3992	4711	1198	1364	4381	4386	2832.4	1281	4384	3.423	1.775	2.72738e-134	6.74036e-133	0.0032	0.0018	0.002	0.002	TRUE	NA
MGG_06658	25883	26061	12259	14679	25190	25892	13454	13667	19550.8	25541	13560	0.531	-0.913	3.16668e-134	7.80856e-133	0.0001	0.0007	0.0006	0.0006	TRUE	NA
MGG_01202	2287	2191	5622	6244	2226	2177	6170	5814	4096.57	2202	5992	2.721	1.444	8.03532e-134	1.97697e-132	0.0009	0.0014	0.0013	0.0013	TRUE	NA
MGG_09752	367	320	1781	2143	357	318	1955	1995	1156.26	338	1975	5.85	2.548	2.05155e-133	5.03634e-132	0	0.0038	0.0035	0.0035	TRUE	NA
MGG_10921	268	282	1659	1860	261	280	1821	1732	1023.38	270	1776	6.566	2.715	2.95045e-133	7.22698e-132	0	0.0042	0.0038	0.0038	TRUE	NA
MGG_05881	21712	21401	10199	12186	21130	21262	11193	11346	16233	21196	11270	0.532	-0.911	1.1127e-132	2.71946e-131	0	0.0007	0.0006	0.0006	TRUE	NA
MGG_08622	18470	16836	7397	8664	17975	16727	8118	8067	12721.8	17351	8092	0.466	-1.1	3.58531e-132	8.74326e-131	0.0011	0.0008	0.0009	0.0009	TRUE	NA
MGG_05625	4109	4095	8238	9603	3999	4068	9041	8941	6512.42	4034	8991	2.229	1.156	6.7318e-132	1.63802e-130	0	0.0011	0.0009	0.0009	TRUE	NA
MGG_06761	1433	1383	3820	4445	1395	1374	4192	4139	2774.93	1384	4166	3.009	1.589	1.52969e-131	3.71396e-130	0	0.0019	0.0016	0.0016	TRUE	NA
MGG_07460	10779	11084	4397	5244	10490	11012	4826	4883	7802.67	10751	4854	0.452	-1.147	4.42324e-131	1.07157e-129	0.0006	0.001	0.0009	0.0009	TRUE	NA
MGG_16299	3897	3851	7914	9137	3793	3826	8686	8507	6202.86	3810	8596	2.256	1.174	4.8602e-131	1.17485e-129	0	0.0011	0.0009	0.0009	TRUE	NA
MGG_10827	30721	30741	15050	17970	29898	30542	16517	16731	23422.2	30220	16624	0.55	-0.862	1.09173e-130	2.63325e-129	0.0001	0.0007	0.0006	0.0006	TRUE	NA
MGG_06542	10663	10375	4174	5158	10377	10308	4581	4802	7517.15	10342	4692	0.454	-1.14	1.49021e-130	3.58656e-129	0.0003	0.001	0.0009	0.0009	TRUE	NA
MGG_06216	601	539	2268	2666	585	536	2489	2482	1522.94	560	2486	4.436	2.149	2.06071e-130	4.94883e-129	0	0.003	0.0027	0.0027	TRUE	NA
MGG_03521	16702	16067	7544	8770	16255	15963	8280	8165	12165.6	16109	8222	0.51	-0.97	5.09799e-130	1.22164e-128	0	0.0008	0.0007	0.0007	TRUE	NA
MGG_14872	328	379	1833	2360	319	377	2012	2197	1226.2	348	2104	6.054	2.598	5.84973e-130	1.39874e-128	0.0054	0.0036	0.0039	0.0039	TRUE	NA
MGG_11813	461	467	1975	2488	449	464	2168	2316	1349.17	456	2242	4.915	2.297	5.8974e-130	1.4071e-128	0	0.0033	0.003	0.003	TRUE	NA
MGG_11611	3635	3407	7324	8722	3538	3385	8038	8121	5770.36	3462	8080	2.334	1.223	8.85185e-130	2.10746e-128	0.0001	0.0012	0.001	0.001	TRUE	NA
MGG_06759	89038	87220	132477	153462	86653	86655	145394	142883	115396	86654	144138	1.663	0.734	1.90562e-129	4.52718e-128	0.0001	0.0005	0.0004	0.0004	TRUE	NA
MGG_03633	384	390	1926	2123	374	387	2114	1977	1212.91	380	2046	5.372	2.426	2.30841e-129	5.47233e-128	0	0.0037	0.0033	0.0033	TRUE	NA
MGG_07971	1655	1548	4363	4879	1611	1538	4788	4543	3119.93	1574	4666	2.963	1.567	9.23863e-129	2.18542e-127	0.0009	0.0017	0.0016	0.0016	TRUE	NA
MGG_01896	8	13	2257	2521	8	13	2477	2347	1211.25	10	2412	233.561	7.868	3.10821e-128	7.33683e-127	0	0.0037	0.0034	0.0034	TRUE	NA
MGG_06584	148	154	1311	1438	144	153	1439	1339	768.68	148	1389	9.349	3.225	3.7197e-128	8.76152e-127	0	0.0055	0.0049	0.0049	TRUE	NA
MGG_03627	1436	1325	3868	4395	1398	1316	4245	4092	2762.78	1357	4168	3.071	1.619	1.09854e-126	2.58203e-125	0.0006	0.0019	0.0017	0.0017	TRUE	NA
MGG_02503	14867	14472	24110	29676	14469	14378	26461	27630	20734.5	14424	27046	1.875	0.907	2.3915e-126	5.6091e-125	0.0004	0.0007	0.0006	0.0006	TRUE	NA
MGG_15340	22	13	1302	1489	21	13	1429	1386	712.41	17	1408	81.812	6.354	5.03134e-125	1.17757e-123	0	0.0059	0.0054	0.0054	TRUE	NA
MGG_00505	118562	111900	181929	207974	115386	111175	199668	193637	154967	113280	196652	1.736	0.796	6.16067e-125	1.43884e-123	0.0006	0.0005	0.0005	0.0005	TRUE	NA
MGG_07219	10	12	1995	2233	10	12	2190	2079	1072.56	11	2134	197.274	7.624	7.61387e-125	1.77448e-123	0	0.0041	0.0038	0.0038	TRUE	NA
MGG_00495	7748	7864	3006	3577	7540	7813	3299	3330	5495.76	7676	3314	0.432	-1.211	1.23969e-124	2.88314e-123	0	0.0012	0.001	0.001	TRUE	NA
MGG_10422	9	16	1777	1911	9	16	1950	1779	938.55	12	1864	151.635	7.244	1.87774e-124	4.35785e-123	0.0043	0.0046	0.0045	0.0045	TRUE	NA
MGG_09307	4675	4607	1446	1544	4550	4577	1587	1438	3037.87	4564	1512	0.331	-1.595	2.23602e-124	5.17847e-123	0.0016	0.0018	0.0017	0.0017	TRUE	NA
MGG_00501	12618	12511	20684	24077	12280	12430	22701	22417	17457	12355	22559	1.826	0.869	1.67257e-123	3.86545e-122	0	0.0007	0.0006	0.0006	TRUE	NA
MGG_06261	4942	4732	1604	1845	4810	4701	1760	1718	3247.29	4756	1739	0.366	-1.452	1.86575e-123	4.30291e-122	0	0.0017	0.0014	0.0014	TRUE	NA
MGG_02917	2715	2732	5838	7083	2642	2714	6407	6595	4589.63	2678	6501	2.428	1.28	2.85838e-123	6.57843e-122	0	0.0013	0.0011	0.0011	TRUE	NA
MGG_01294	1134	1175	3304	3867	1104	1167	3626	3600	2374.4	1136	3613	3.182	1.67	2.94703e-123	6.76836e-122	0	0.0021	0.0018	0.0018	TRUE	NA
MGG_03906	828	709	2826	3164	806	704	3102	2946	1889.42	755	3024	4.002	2.001	7.80033e-123	1.78776e-121	0.0035	0.0025	0.0026	0.0026	TRUE	NA
MGG_03715	462	549	2244	2962	450	545	2463	2758	1553.92	498	2610	5.251	2.392	1.50635e-122	3.44527e-121	0.0101	0.003	0.0038	0.0038	TRUE	NA
MGG_01233	17310	17609	8066	9239	16846	17495	8852	8602	12949	17170	8727	0.508	-0.977	1.54768e-122	3.53248e-121	0.0004	0.0008	0.0007	0.0007	TRUE	NA
MGG_02593	562	470	2253	2535	547	467	2473	2360	1461.71	507	2416	4.764	2.252	1.84244e-122	4.19659e-121	0.0044	0.0031	0.0032	0.0032	TRUE	NA
MGG_07101	9111	8934	15243	17926	8867	8876	16729	16690	12790.6	8872	16710	1.884	0.913	2.32126e-122	5.27634e-121	0	0.0008	0.0006	0.0006	TRUE	NA
MGG_04825	9014	9216	3191	4114	8773	9156	3502	3830	6315.35	8964	3666	0.409	-1.289	5.59396e-122	1.26892e-120	0.0021	0.0011	0.0013	0.0013	TRUE	NA
MGG_01394	74	86	1025	1200	72	85	1125	1117	599.92	78	1121	14.248	3.833	9.37823e-122	2.12298e-120	0	0.0069	0.0061	0.0061	TRUE	NA
MGG_02541	4314	4069	1280	1413	4198	4043	1405	1316	2740.37	4120	1360	0.33	-1.6	1.26087e-121	2.84844e-120	0.0008	0.0019	0.0017	0.0017	TRUE	NA
MGG_14806	894	820	2777	3191	870	815	3048	2971	1925.88	842	3010	3.572	1.837	1.57322e-121	3.5468e-120	0	0.0025	0.0022	0.0022	TRUE	NA
MGG_00937	491	475	1955	2293	478	472	2146	2135	1307.58	475	2140	4.507	2.172	4.05655e-121	9.12682e-120	0	0.0034	0.0029	0.0029	TRUE	NA
MGG_08593	6721	6589	2549	2897	6541	6546	2798	2697	4645.53	6544	2748	0.42	-1.253	1.49976e-120	3.36745e-119	0	0.0013	0.0011	0.0011	TRUE	NA
MGG_09246	3619	3535	1027	1227	3522	3512	1127	1142	2325.93	3517	1134	0.323	-1.632	8.39389e-120	1.88088e-118	0	0.0021	0.0018	0.0018	TRUE	NA
MGG_10586	4394	4689	9259	11323	4276	4659	10162	10542	7409.79	4468	10352	2.318	1.213	1.13548e-119	2.53919e-118	0.0018	0.001	0.0011	0.0011	TRUE	NA
MGG_06751	2685	2637	5858	6645	2613	2620	6429	6187	4462.28	2616	6308	2.41	1.269	1.00131e-118	2.23464e-117	0	0.0014	0.0012	0.0012	TRUE	NA
MGG_05228	1851	1746	4511	5070	1801	1735	4951	4721	3301.86	1768	4836	2.734	1.451	1.26789e-118	2.82387e-117	0.0007	0.0017	0.0015	0.0015	TRUE	NA
MGG_08660	98	83	1006	1239	95	82	1104	1154	608.88	88	1129	12.692	3.666	1.55695e-118	3.46068e-117	0	0.0068	0.0061	0.0061	TRUE	NA
MGG_02275	18474	16453	7224	8301	17979	16346	7928	7729	12495.7	17162	7828	0.456	-1.133	5.63722e-118	1.25049e-116	0.0022	0.0008	0.0011	0.0011	TRUE	NA
MGG_07949	3143	3187	816	849	3059	3166	896	790	1977.8	3112	843	0.27	-1.887	8.18315e-118	1.81161e-116	0.0027	0.0024	0.0025	0.0025	TRUE	NA
MGG_06953	10938	9980	19053	21861	10645	9915	20911	20354	15456.3	10280	20632	2.007	1.005	1.06823e-117	2.36015e-116	0.0013	0.0007	0.0008	0.0008	TRUE	NA
MGG_01323	4682	4890	9312	11422	4557	4858	10220	10635	7567.37	4708	10428	2.215	1.148	1.07383e-117	2.36778e-116	0.0011	0.001	0.001	0.001	TRUE	NA
MGG_03238	16700	16350	25909	30308	16253	16244	28435	28219	22287.7	16248	28327	1.743	0.802	2.58404e-117	5.68644e-116	0	0.0007	0.0005	0.0005	TRUE	NA
MGG_10098	1254	1034	8904	9680	1220	1027	9772	9013	5258.15	1124	9392	8.356	3.063	3.48211e-117	7.64748e-116	0.008	0.0012	0.0019	0.008	TRUE	NA
MGG_01373	8425	7586	2960	3373	8199	7537	3249	3140	5531.32	7868	3194	0.406	-1.301	4.84734e-117	1.06247e-115	0.0016	0.0012	0.0013	0.0013	TRUE	NA
MGG_06197	8185	7703	3149	3746	7966	7653	3456	3488	5640.67	7810	3472	0.445	-1.169	5.13049e-117	1.12231e-115	0.0003	0.0012	0.001	0.001	TRUE	NA
MGG_07927	7481	7443	13041	15047	7281	7395	14313	14010	10749.4	7338	14162	1.93	0.948	2.11273e-116	4.61251e-115	0	0.0009	0.0007	0.0007	TRUE	NA
MGG_02884	10	12	1627	1975	10	12	1786	1839	911.54	11	1812	167.57	7.389	3.52738e-116	7.6858e-115	0	0.0047	0.0042	0.0042	TRUE	NA
MGG_16711	4874	4798	1677	1924	4743	4767	1841	1791	3285.56	4755	1816	0.382	-1.389	6.63332e-116	1.44249e-114	0	0.0017	0.0014	0.0014	TRUE	NA
MGG_10306	3560	3380	939	965	3465	3358	1031	898	2187.94	3412	964	0.282	-1.825	6.92281e-116	1.50248e-114	0.0036	0.0022	0.0024	0.0024	TRUE	NA
MGG_10661	117	153	1163	1467	114	152	1276	1366	727.04	133	1321	9.949	3.315	1.26132e-115	2.73212e-114	0.0109	0.0058	0.006	0.006	TRUE	NA
MGG_00168	13309	12823	6044	6998	12952	12740	6633	6516	9710.33	12846	6574	0.512	-0.967	1.62494e-115	3.51286e-114	0	0.0009	0.0007	0.0007	TRUE	NA
MGG_15060	510	443	1942	2477	496	440	2131	2306	1343.52	468	2218	4.739	2.245	1.84854e-115	3.98844e-114	0.0035	0.0033	0.0034	0.0034	TRUE	NA
MGG_06212	78	87	959	1196	76	86	1053	1114	582.1	81	1084	13.352	3.739	1.87431e-115	4.03617e-114	0	0.0071	0.0063	0.0063	TRUE	NA
MGG_12722	89	86	978	1163	87	85	1073	1083	582.06	86	1078	12.532	3.648	2.65535e-115	5.70694e-114	0	0.0071	0.0061	0.0061	TRUE	NA
MGG_02408	468	490	1888	2318	455	487	2072	2158	1293.15	471	2115	4.491	2.167	3.66088e-115	7.85277e-114	0	0.0035	0.0031	0.0031	TRUE	NA
MGG_01113	18814	18233	9074	10714	18310	18115	9959	9975	14089.8	18212	9967	0.547	-0.87	4.97876e-115	1.0659e-113	0	0.0008	0.0006	0.0006	TRUE	NA
MGG_04829	17117	17269	8200	9674	16658	17157	9000	9007	12955.6	16908	9004	0.533	-0.909	5.20964e-115	1.11317e-113	0.0002	0.0008	0.0007	0.0007	TRUE	NA
MGG_08486	21	27	1070	1115	20	27	1174	1038	564.93	24	1106	46.841	5.55	5.21978e-115	1.11318e-113	0	0.0073	0.0072	0.0072	TRUE	NA
MGG_12712	2171	1977	397	453	2113	1964	436	422	1233.63	2038	429	0.21	-2.25	8.05466e-115	1.71445e-113	0	0.0036	0.0033	0.0033	TRUE	NA
MGG_10456	387751	368404	206455	246124	377365	366017	226585	229158	299781	371691	227872	0.613	-0.706	1.00488e-114	2.13478e-113	0.0003	0.0005	0.0005	0.0005	TRUE	NA
MGG_00606	219	232	1316	1643	213	230	1444	1530	854.42	222	1487	6.707	2.746	1.50504e-114	3.19121e-113	0	0.005	0.0044	0.0044	TRUE	NA
MGG_09381	1442	1384	3777	4212	1403	1375	4145	3922	2711.33	1389	4034	2.902	1.537	2.47097e-114	5.22926e-113	0	0.0019	0.0017	0.0017	TRUE	NA
MGG_08045	190	168	1267	1420	185	167	1391	1322	766.12	176	1356	7.706	2.946	2.64624e-114	5.58949e-113	0	0.0055	0.0049	0.0049	TRUE	NA
MGG_09200	4736	4785	8887	10384	4609	4754	9754	9668	7196.21	4682	9711	2.074	1.053	2.74116e-114	5.77893e-113	0	0.001	0.0009	0.0009	TRUE	NA
MGG_05933	9859	9866	4297	5043	9595	9802	4716	4695	7202.08	9698	4706	0.485	-1.043	3.42722e-114	7.21152e-113	0	0.001	0.0009	0.0009	TRUE	NA
MGG_03193	20872	20653	10388	12179	20313	20519	11401	11339	15893.1	20416	11370	0.557	-0.844	4.28113e-114	8.99118e-113	0	0.0007	0.0006	0.0006	TRUE	NA
MGG_04326	2317	2406	5241	6154	2255	2390	5752	5730	4031.79	2322	5741	2.472	1.306	1.22885e-113	2.57592e-112	0.0002	0.0014	0.0013	0.0013	TRUE	NA
MGG_00119	729	651	2377	2755	709	647	2609	2565	1632.53	678	2587	3.814	1.931	2.02712e-113	4.2412e-112	0	0.0028	0.0026	0.0026	TRUE	NA
MGG_01742	67475	63689	34259	38971	65668	63276	37599	36285	50707	64472	36942	0.573	-0.804	2.62979e-113	5.49174e-112	0.0006	0.0006	0.0006	0.0006	TRUE	NA
MGG_09955	28204	28813	14059	16792	27449	28626	15430	15634	21784.8	28038	15532	0.554	-0.852	4.12171e-113	8.59105e-112	0.0004	0.0007	0.0006	0.0006	TRUE	NA
MGG_10431	124	129	1141	1237	121	128	1252	1152	663.21	124	1202	9.658	3.272	4.74305e-113	9.86752e-112	0	0.0063	0.0057	0.0057	TRUE	NA
MGG_05622	4619	4635	8651	10056	4495	4605	9495	9363	6989.39	4550	9429	2.072	1.051	4.96178e-113	1.03032e-111	0	0.001	0.0009	0.0009	TRUE	NA
MGG_07928	25041	24119	12571	14639	24370	23963	13797	13630	18939.9	24166	13714	0.567	-0.818	9.18198e-112	1.90306e-110	0	0.0007	0.0006	0.0006	TRUE	NA
MGG_06936	10714	10627	4806	5626	10427	10558	5275	5238	7874.49	10492	5256	0.501	-0.997	1.13085e-111	2.33942e-110	0	0.001	0.0008	0.0008	TRUE	NA
MGG_06168	858	767	2677	3007	835	762	2938	2800	1833.69	798	2869	3.591	1.844	1.47125e-111	3.03793e-110	0.0015	0.0026	0.0025	0.0025	TRUE	NA
MGG_03372	17704	18065	8526	10067	17230	17948	9357	9373	13477	17589	9365	0.532	-0.909	2.50496e-111	5.16274e-110	0.0004	0.0008	0.0007	0.0007	TRUE	NA
MGG_07851	1514	1436	192	246	1473	1427	211	229	834.98	1450	220	0.152	-2.719	3.55317e-111	7.30947e-110	0	0.0051	0.0044	0.0044	TRUE	NA
MGG_05901	2788	2740	5698	6662	2713	2722	6254	6203	4472.98	2718	6228	2.292	1.196	3.7303e-111	7.65961e-110	0	0.0014	0.0011	0.0011	TRUE	NA
MGG_05411	22	17	980	1208	21	17	1076	1125	559.65	19	1100	57.399	5.843	5.3184e-111	1.09002e-109	0	0.0073	0.0066	0.0066	TRUE	NA
MGG_00593	55	47	945	1003	54	47	1037	934	517.81	50	986	19.646	4.296	1.13848e-110	2.32903e-109	0	0.0079	0.0074	0.0074	TRUE	NA
MGG_04758	9287	9918	3717	4479	9038	9854	4079	4170	6785.41	9446	4124	0.437	-1.195	3.22775e-110	6.59093e-109	0.0016	0.0011	0.0012	0.0012	TRUE	NA
MGG_06958	990591	977356	1369050	1624773	964057	971025	1502537	1512770	1.2376e+06	967541	1507654	1.558	0.64	5.20954e-110	1.0618e-108	0	0.0005	0.0004	0.0004	TRUE	NA
MGG_13928	10858	9975	4369	4935	10567	9910	4795	4595	7466.83	10238	4695	0.458	-1.125	5.29766e-110	1.07778e-108	0.0012	0.001	0.0011	0.0011	TRUE	NA
MGG_09821	1942	1818	4575	5106	1890	1806	5021	4754	3367.83	1848	4888	2.644	1.403	6.41019e-110	1.30172e-108	0.001	0.0016	0.0015	0.0015	TRUE	NA
MGG_07626	5429	5320	9613	11178	5284	5286	10550	10407	7881.72	5285	10478	1.983	0.988	7.1804e-110	1.45545e-108	0	0.001	0.0008	0.0008	TRUE	NA
MGG_17353	69	72	917	1050	67	72	1006	978	530.68	70	992	14.307	3.839	1.48361e-109	3.00173e-108	0	0.0077	0.0067	0.0067	TRUE	NA
MGG_02268	1757	1685	4027	4720	1710	1674	4420	4395	3049.57	1692	4408	2.605	1.381	4.01614e-109	8.11084e-108	0	0.0018	0.0015	0.0015	TRUE	NA
MGG_10503	8839	9025	14942	17808	8602	8967	16399	16580	12637	8784	16490	1.877	0.909	9.69717e-109	1.95483e-107	0.0003	0.0008	0.0007	0.0007	TRUE	NA
MGG_14150	2822	2738	5662	7000	2746	2720	6214	6517	4549.55	2733	6366	2.329	1.22	9.78265e-109	1.96847e-107	0.0005	0.0013	0.0012	0.0012	TRUE	NA
MGG_06919	18634	18353	9107	10940	18135	18234	9995	10186	14137.5	18184	10090	0.555	-0.85	2.57838e-108	5.17879e-107	0	0.0008	0.0006	0.0006	TRUE	NA
MGG_02617	8164	7712	3255	3901	7945	7662	3572	3632	5702.95	7804	3602	0.462	-1.115	4.31246e-108	8.64605e-107	0	0.0012	0.001	0.001	TRUE	NA
MGG_04244	6690	6764	2689	3129	6511	6720	2951	2913	4773.87	6616	2932	0.443	-1.174	5.01156e-108	1.00295e-106	0	0.0013	0.0011	0.0011	TRUE	NA
MGG_08185	373	403	1661	1987	363	400	1823	1850	1109.09	382	1836	4.813	2.267	5.78247e-108	1.15514e-106	0	0.004	0.0035	0.0035	TRUE	NA
MGG_02747	20470	19716	10081	11956	19922	19588	11064	11132	15426.4	19755	11098	0.562	-0.832	6.01279e-108	1.19898e-106	0	0.0007	0.0006	0.0006	TRUE	NA
MGG_09533	339	374	1597	1931	330	372	1753	1798	1063.02	351	1776	5.063	2.34	1.30709e-107	2.60169e-106	0	0.0041	0.0037	0.0037	TRUE	NA
MGG_07216	14	22	974	1197	14	22	1069	1114	554.73	18	1092	61.68	5.947	1.56515e-107	3.10975e-106	0	0.0074	0.0068	0.0068	TRUE	NA
MGG_03965	7664	7611	3103	3784	7459	7562	3406	3523	5487.28	7510	3464	0.461	-1.116	1.84579e-107	3.66076e-106	0	0.0012	0.001	0.001	TRUE	NA
MGG_08577	3560	3751	7285	8664	3465	3727	7995	8067	5813.35	3596	8031	2.234	1.159	2.24621e-107	4.44692e-106	0.0009	0.0012	0.0011	0.0011	TRUE	NA
MGG_04476	5688	5388	2042	2450	5536	5353	2241	2281	3852.74	5444	2261	0.415	-1.267	3.2842e-107	6.49026e-106	0	0.0015	0.0013	0.0013	TRUE	NA
MGG_11597	8822	8946	14683	17550	8586	8888	16115	16340	12482.1	8737	16228	1.857	0.893	4.26459e-107	8.41267e-106	0.0002	0.0008	0.0007	0.0007	TRUE	NA
MGG_04826	4063	3655	1132	1207	3954	3631	1242	1124	2487.91	3792	1183	0.312	-1.682	6.82602e-107	1.34415e-105	0.0032	0.002	0.0023	0.0023	TRUE	NA
MGG_03395	12	20	1035	1238	12	20	1136	1153	580.03	16	1144	72.722	6.184	8.21012e-107	1.61383e-105	0	0.0071	0.0064	0.0064	TRUE	NA
MGG_13177	3282	3321	6435	7817	3194	3299	7062	7278	5208.54	3246	7170	2.209	1.143	9.37457e-107	1.83945e-105	0.0003	0.0012	0.0011	0.0011	TRUE	NA
MGG_08759	399	414	1733	1953	388	411	1902	1818	1129.99	400	1860	4.652	2.218	9.90359e-107	1.9398e-105	0	0.0039	0.0034	0.0034	TRUE	NA
MGG_13219	5860	6254	2059	2547	5703	6213	2260	2371	4136.93	5958	2316	0.389	-1.363	1.19229e-106	2.33119e-105	0.0023	0.0014	0.0016	0.0016	TRUE	NA
MGG_01404	6712	6285	2548	2950	6532	6244	2796	2747	4579.89	6388	2772	0.434	-1.205	1.31956e-106	2.57547e-105	0.0005	0.0013	0.0012	0.0012	TRUE	NA
MGG_03288	13371	12719	20530	24508	13013	12637	22532	22819	17749.9	12825	22676	1.768	0.822	2.55075e-106	4.96968e-105	0.0001	0.0007	0.0006	0.0006	TRUE	NA
MGG_01444	18243	17713	27099	32116	17754	17598	29741	29902	23749	17676	29822	1.687	0.755	6.92857e-106	1.34753e-104	0	0.0007	0.0005	0.0005	TRUE	NA
MGG_12892	13769	13146	6410	7417	13400	13061	7035	6906	10100.4	13230	6970	0.527	-0.925	9.59375e-106	1.8626e-104	0.0002	0.0009	0.0008	0.0008	TRUE	NA
MGG_15769	2092	2224	4980	6412	2036	2210	5466	5970	3920.28	2123	5718	2.695	1.43	1.38853e-105	2.69107e-104	0.003	0.0015	0.0017	0.0017	TRUE	NA
MGG_11553	3011	2800	798	891	2930	2782	876	830	1854.4	2856	853	0.298	-1.745	2.97043e-105	5.74682e-104	0	0.0026	0.0023	0.0023	TRUE	NA
MGG_00409	43160	41399	22868	26840	42004	41131	25098	24990	33305.6	41568	25044	0.602	-0.731	3.15018e-105	6.08392e-104	0.0001	0.0006	0.0005	0.0005	TRUE	NA
MGG_10150	3030	3101	6206	7174	2949	3081	6811	6679	4880.08	3015	6745	2.237	1.162	3.68841e-105	7.11097e-104	0.0002	0.0013	0.0011	0.0011	TRUE	NA
MGG_09026	8188	8734	15170	18433	7969	8677	16649	17162	12614.4	8323	16906	2.031	1.023	5.56244e-105	1.07053e-103	0.0019	0.0008	0.001	0.001	TRUE	NA
MGG_01101	7300	6961	12017	14170	7104	6916	13189	13193	10100.6	7010	13191	1.882	0.912	5.74801e-105	1.10432e-103	0	0.0009	0.0007	0.0007	TRUE	NA
MGG_08624	7462	7242	13310	14782	7262	7195	14608	13763	10707	7228	14186	1.962	0.972	6.40257e-105	1.22794e-103	0.0007	0.0009	0.0009	0.0009	TRUE	NA
MGG_03200	1878	1761	4161	4873	1828	1750	4567	4537	3170.27	1789	4552	2.545	1.347	9.88536e-105	1.89261e-103	0	0.0017	0.0015	0.0015	TRUE	NA
MGG_04329	10904	10748	17045	20308	10612	10678	18707	18908	14726.3	10645	18808	1.767	0.821	1.07529e-104	2.05514e-103	0	0.0008	0.0006	0.0006	TRUE	NA
MGG_08584	4280	4166	1462	1696	4165	4139	1605	1579	2872	4152	1592	0.383	-1.383	1.60778e-104	3.06756e-103	0	0.0018	0.0015	0.0015	TRUE	NA
MGG_02487	4535	4623	8416	10396	4414	4593	9237	9679	6980.63	4504	9458	2.101	1.071	1.75059e-104	3.33427e-103	0.0006	0.001	0.001	0.001	TRUE	NA
MGG_07228	81	92	890	1162	79	91	977	1082	557.23	85	1030	12.105	3.598	3.49708e-104	6.64927e-103	0	0.0074	0.007	0.007	TRUE	NA
MGG_00522	6203	6276	10731	12687	6037	6235	11777	11812	8965.48	6136	11794	1.922	0.943	6.68998e-104	1.26983e-102	0	0.0009	0.0008	0.0008	TRUE	NA
MGG_18016	152	169	1130	1288	148	168	1240	1199	688.81	158	1220	7.725	2.95	6.79393e-104	1.28735e-102	0	0.0061	0.0054	0.0054	TRUE	NA
MGG_12247	24	16	964	1029	23	16	1058	958	513.83	20	1008	51.248	5.679	9.30654e-104	1.76043e-102	0	0.008	0.0076	0.0076	TRUE	NA
MGG_17365	1338	1322	3279	3901	1302	1313	3599	3632	2461.6	1308	3616	2.765	1.467	1.29231e-103	2.44036e-102	0	0.0021	0.0017	0.0017	TRUE	NA
MGG_03940	6173	5619	2153	2556	6008	5583	2363	2380	4083.24	5796	2372	0.409	-1.289	1.50601e-103	2.83906e-102	0.0013	0.0014	0.0014	0.0014	TRUE	NA
MGG_09761	136703	138588	197128	234950	133041	137690	216349	218754	176458	135366	217552	1.607	0.685	3.1286e-103	5.88785e-102	0.0003	0.0005	0.0005	0.0005	TRUE	NA
MGG_11410	11143	10637	4960	5931	10845	10568	5444	5522	8094.59	10706	5483	0.512	-0.965	3.44915e-103	6.48007e-102	0	0.001	0.0008	0.0008	TRUE	NA
MGG_08936	4992	4845	1724	1817	4858	4814	1892	1692	3313.93	4836	1792	0.37	-1.434	4.8359e-103	9.06998e-102	0.0024	0.0017	0.0017	0.0017	TRUE	NA
MGG_10685	6583	6795	11665	14342	6407	6751	12802	13353	9828.34	6579	13078	1.988	0.991	7.91963e-103	1.48285e-101	0.0009	0.0009	0.0009	0.0009	TRUE	NA
MGG_15344	1134	1029	18	16	1104	1022	20	15	540.15	1063	18	0.016	-5.954	2.15899e-102	4.03559e-101	0	0.0076	0.007	0.007	TRUE	NA
MGG_00245	2658	2518	620	799	2587	2502	680	744	1628.22	2544	712	0.28	-1.835	2.64289e-102	4.93176e-101	0.0006	0.0028	0.0026	0.0026	TRUE	NA
MGG_03439	5823	5432	10379	11752	5667	5397	11391	10942	8349.18	5532	11166	2.018	1.013	6.51488e-102	1.21366e-100	0.0007	0.001	0.0009	0.0009	TRUE	NA
MGG_00650	4982	4868	8647	10175	4849	4836	9490	9474	7162.18	4842	9482	1.958	0.969	3.76414e-101	7.00041e-100	0	0.001	0.0008	0.0008	TRUE	NA
MGG_10716	356	315	1491	1776	346	313	1636	1654	987.34	330	1645	4.988	2.319	3.84455e-101	7.13794e-100	0	0.0044	0.0039	0.0039	TRUE	NA
MGG_06179	3757	3756	1231	1474	3656	3732	1351	1372	2527.86	3694	1362	0.369	-1.439	5.74285e-101	1.06445e-99	0	0.002	0.0017	0.0017	TRUE	NA
MGG_05238	9847	9475	4415	5076	9583	9414	4845	4726	7142.11	9498	4786	0.504	-0.989	5.79058e-101	1.0715e-99	0	0.001	0.0009	0.0009	TRUE	NA
MGG_02806	12732	12535	19378	22920	12391	12454	21267	21340	16863	12422	21304	1.715	0.778	1.90554e-100	3.52015e-99	0	0.0007	0.0006	0.0006	TRUE	NA
MGG_11497	2965	2740	5764	6778	2886	2722	6326	6311	4561.15	2804	6318	2.253	1.172	4.21228e-100	7.76846e-99	0.0003	0.0013	0.0012	0.0012	TRUE	NA
MGG_10723	8600	7937	3378	4105	8370	7886	3707	3822	5946.15	8128	3764	0.463	-1.11	6.44078e-100	1.18585e-98	0.001	0.0011	0.0011	0.0011	TRUE	NA
MGG_08014	179	182	1125	1296	174	181	1235	1207	699.09	178	1221	6.876	2.782	1.33956e-99	2.46226e-98	0	0.006	0.0051	0.0051	TRUE	NA
MGG_07631	4251	4162	1462	1766	4137	4135	1605	1644	2880.25	4136	1624	0.393	-1.348	2.25519e-99	4.13838e-98	0	0.0018	0.0015	0.0015	TRUE	NA
MGG_05317	4687	4505	1637	1754	4561	4476	1797	1633	3116.74	4518	1715	0.379	-1.399	9.49069e-99	1.7387e-97	0.0016	0.0017	0.0017	0.0017	TRUE	NA
MGG_00081	14542	13624	22211	25912	14152	13536	24377	24126	19047.7	13844	24252	1.752	0.809	2.28149e-98	4.17279e-97	0.0004	0.0007	0.0007	0.0007	TRUE	NA
MGG_07842	1348	1220	174	182	1312	1212	191	169	721.1	1262	180	0.142	-2.812	3.70288e-98	6.76127e-97	0	0.0058	0.0054	0.0054	TRUE	NA
MGG_01566	3219	3033	886	1120	3133	3013	972	1043	2040.33	3073	1008	0.328	-1.607	1.00108e-97	1.82491e-96	0.0007	0.0024	0.0022	0.0022	TRUE	NA
MGG_13651	4055	3896	1343	1639	3946	3871	1474	1526	2704.28	3908	1500	0.384	-1.381	2.16611e-97	3.94218e-96	0	0.0019	0.0016	0.0016	TRUE	NA
MGG_06605	3762	3574	7063	8003	3661	3551	7752	7451	5603.77	3606	7602	2.108	1.076	2.24414e-97	4.07747e-96	0.0005	0.0012	0.0011	0.0011	TRUE	NA
MGG_06480	10183	10168	4767	5559	9910	10102	5232	5176	7604.99	10006	5204	0.52	-0.943	4.20774e-97	7.63266e-96	0	0.001	0.0008	0.0008	TRUE	NA
MGG_13645	16881	15915	8091	9613	16429	15812	8880	8950	12517.7	16120	8915	0.553	-0.855	1.07831e-96	1.95281e-95	0.0003	0.0008	0.0007	0.0007	TRUE	NA
MGG_06036	96	112	914	1072	93	111	1003	998	551.48	102	1000	9.781	3.29	1.67177e-96	3.0226e-95	0	0.0074	0.0067	0.0067	TRUE	NA
MGG_06484	4332	4284	7647	9005	4216	4256	8393	8384	6312.27	4236	8388	1.98	0.986	1.98221e-96	3.57802e-95	0	0.0011	0.0009	0.0009	TRUE	NA
MGG_06952	11335	11600	5145	6301	11031	11525	5647	5867	8517.38	11278	5757	0.511	-0.97	2.4702e-96	4.4516e-95	0.0006	0.0009	0.0009	0.0009	TRUE	NA
MGG_02921	2288	2267	587	649	2227	2252	644	604	1431.88	2240	624	0.278	-1.844	2.67151e-96	4.80654e-95	0	0.0032	0.0027	0.0027	TRUE	NA
MGG_04890	175	176	1091	1248	170	175	1197	1162	676.13	172	1180	6.835	2.773	4.685e-96	8.41547e-95	0	0.0062	0.0053	0.0053	TRUE	NA
MGG_02897	5222	4982	8937	10348	5082	4950	9808	9635	7368.73	5016	9722	1.938	0.955	8.77178e-96	1.57308e-94	0	0.001	0.0009	0.0009	TRUE	NA
MGG_06769	6514	6671	11222	13945	6340	6628	12316	12984	9566.8	6484	12650	1.951	0.965	4.08014e-95	7.30524e-94	0.001	0.0009	0.0009	0.0009	TRUE	NA
MGG_02953	12687	12102	5977	7106	12347	12024	6560	6616	9386.67	12186	6588	0.541	-0.887	4.6461e-95	8.30509e-94	0	0.0009	0.0008	0.0008	TRUE	NA
MGG_07535	4037	4004	7250	8436	3929	3978	7957	7854	5929.57	3954	7906	2	1	2.0185e-94	3.60232e-93	0	0.0011	0.0009	0.0009	TRUE	NA
MGG_06765	4086	4021	7192	8730	3977	3995	7893	8128	5998.24	3986	8010	2.01	1.007	2.86195e-94	5.09935e-93	0	0.0011	0.001	0.001	TRUE	NA
MGG_08613	1884	2044	4407	5284	1834	2031	4837	4920	3405.19	1932	4878	2.525	1.336	6.60814e-94	1.17553e-92	0.002	0.0016	0.0017	0.0017	TRUE	NA
MGG_07005	73819	72852	42321	49652	71842	72380	46447	46229	59224.6	72111	46338	0.643	-0.638	9.13351e-94	1.62095e-92	0	0.0006	0.0004	0.0004	TRUE	NA
MGG_08112	2170	2045	4502	5163	2112	2032	4941	4807	3472.92	2072	4874	2.352	1.234	9.14143e-94	1.62095e-92	0	0.0016	0.0014	0.0014	TRUE	NA
MGG_09194	15846	15201	7891	9091	15422	15103	8660	8464	11912.2	15262	8562	0.561	-0.834	9.87526e-94	1.74827e-92	0.0001	0.0008	0.0007	0.0007	TRUE	NA
MGG_07630	16954	14377	2217	2315	16500	14284	2433	2155	8843.08	15392	2294	0.149	-2.746	1.15892e-93	2.04842e-92	0.0083	0.0009	0.0019	0.0083	TRUE	NA
MGG_00311	9	4	2023	2292	9	4	2220	2134	1091.75	6	2177	340.612	8.412	1.81087e-93	3.19564e-92	0	0.004	0.0037	0.0037	TRUE	NA
MGG_06534	999	1051	104	118	972	1044	114	110	560.11	1008	112	0.111	-3.171	2.16316e-93	3.81123e-92	0	0.0073	0.0065	0.0065	TRUE	NA
MGG_05467	19657	18927	10136	11790	19130	18804	11124	10977	15009.1	18967	11050	0.583	-0.779	3.49911e-93	6.1552e-92	0	0.0008	0.0006	0.0006	TRUE	NA
MGG_02098	2776	2347	6128	6831	2702	2332	6726	6360	4529.76	2517	6543	2.599	1.378	1.03194e-92	1.81237e-91	0.0056	0.0013	0.0019	0.0019	TRUE	NA
MGG_05139	3380	3146	982	1002	3289	3126	1078	933	2106.44	3208	1006	0.313	-1.676	1.44178e-92	2.52816e-91	0.0045	0.0023	0.0026	0.0026	TRUE	NA
MGG_03481	3803	3809	6886	8049	3701	3784	7557	7494	5634.25	3742	7526	2.011	1.008	3.37282e-92	5.90484e-91	0	0.0012	0.001	0.001	TRUE	NA
MGG_07966	29	18	752	872	28	18	825	812	420.83	23	818	35.438	5.147	3.54674e-92	6.1995e-91	0	0.0096	0.0088	0.0088	TRUE	NA
MGG_00317	2417	2354	620	775	2352	2339	680	722	1523.26	2346	701	0.299	-1.741	4.25896e-92	7.43266e-91	0	0.003	0.0026	0.0026	TRUE	NA
MGG_00431	13676	12636	6255	7231	13310	12554	6865	6733	9865.31	12932	6799	0.526	-0.928	4.84185e-92	8.43657e-91	0.0007	0.0009	0.0009	0.0009	TRUE	NA
MGG_14011	1803	1861	3955	4804	1755	1849	4341	4473	3104.28	1802	4407	2.446	1.291	5.15494e-92	8.96798e-91	0.0004	0.0017	0.0015	0.0015	TRUE	NA
MGG_02793	398	351	1571	1748	387	349	1724	1628	1021.94	368	1676	4.551	2.186	6.54549e-92	1.13692e-90	0.0014	0.0042	0.0039	0.0039	TRUE	NA
MGG_17041	7174	6947	3072	3671	6982	6902	3372	3418	5168.33	6942	3395	0.489	-1.032	1.07265e-91	1.86022e-90	0	0.0012	0.001	0.001	TRUE	NA
MGG_17813	2028	1946	4140	4922	1974	1933	4544	4583	3258.36	1954	4564	2.336	1.224	1.98452e-91	3.43621e-90	0	0.0017	0.0014	0.0014	TRUE	NA
MGG_16077	1423	1320	215	271	1385	1311	236	252	796.15	1348	244	0.181	-2.463	3.05574e-91	5.28275e-90	0	0.0053	0.0047	0.0047	TRUE	NA
MGG_06657	20045	19737	10175	12412	19508	19609	11167	11556	15460.2	19558	11362	0.581	-0.783	3.74781e-91	6.46907e-90	0.0002	0.0007	0.0006	0.0006	TRUE	NA
MGG_08765	6644	6433	2740	3337	6466	6391	3007	3107	4742.87	6428	3057	0.476	-1.072	5.19552e-91	8.95397e-90	0	0.0013	0.0011	0.0011	TRUE	NA
MGG_15083	899	974	2617	3016	875	968	2872	2808	1880.72	922	2840	3.083	1.624	7.4262e-91	1.27784e-89	0.0012	0.0025	0.0024	0.0024	TRUE	NA
MGG_14778	284	285	1331	1482	276	283	1461	1380	850.04	280	1420	5.075	2.343	9.67289e-91	1.66184e-89	0	0.005	0.0044	0.0044	TRUE	NA
MGG_00555	1658	1567	3904	4258	1614	1557	4285	3964	2854.89	1586	4124	2.601	1.379	1.14412e-90	1.96259e-89	0.0016	0.0018	0.0018	0.0018	TRUE	NA
MGG_17503	30	28	693	846	29	28	761	788	401.32	28	774	27.155	4.763	1.18353e-90	2.02705e-89	0	0.01	0.0088	0.0088	TRUE	NA
MGG_05673	15351	15352	7495	9203	14940	15253	8226	8569	11746.7	15096	8398	0.556	-0.846	1.82077e-90	3.11364e-89	0.0003	0.0008	0.0008	0.0008	TRUE	NA
MGG_06279	720	688	2103	2428	701	684	2308	2261	1488.23	692	2284	3.3	1.722	3.26457e-90	5.57399e-89	0	0.0031	0.0026	0.0026	TRUE	NA
MGG_09931	716	610	2124	2497	697	606	2331	2325	1489.71	652	2328	3.573	1.837	3.37727e-90	5.75752e-89	0.0029	0.0031	0.003	0.003	TRUE	NA
MGG_17531	43627	44504	64041	78646	42458	44216	70285	73225	57546	43337	71755	1.656	0.728	4.02758e-90	6.85557e-89	0.0008	0.0006	0.0006	0.0006	TRUE	NA
MGG_00978	9246	9081	14270	17565	8998	9022	15661	16354	12509	9010	16008	1.777	0.829	1.6032e-89	2.7247e-88	0.0004	0.0008	0.0007	0.0007	TRUE	NA
MGG_12469	9	9	1125	1435	9	9	1235	1336	647.12	9	1286	145.305	7.183	5.18191e-89	8.79333e-88	0	0.0064	0.006	0.006	TRUE	NA
MGG_05047	7692	7649	12113	14712	7486	7599	13294	13698	10519.3	7542	13496	1.789	0.84	7.42733e-89	1.25843e-87	0.0002	0.0009	0.0007	0.0007	TRUE	NA
MGG_14897	191	185	1076	1216	186	184	1181	1132	670.69	185	1156	6.255	2.645	8.02941e-89	1.35836e-87	0	0.0062	0.0053	0.0053	TRUE	NA
MGG_03435	676	631	1981	2334	658	627	2174	2173	1408.02	642	2174	3.383	1.758	1.08996e-88	1.8411e-87	0	0.0032	0.0027	0.0027	TRUE	NA
MGG_02075	30	41	729	800	29	41	800	745	403.72	35	772	22.113	4.467	1.14818e-88	1.93647e-87	0	0.01	0.0093	0.0093	TRUE	NA
MGG_08276	1636	1522	3759	4155	1592	1512	4126	3869	2774.6	1552	3998	2.574	1.364	1.32991e-88	2.23956e-87	0.0014	0.0019	0.0018	0.0018	TRUE	NA
MGG_02283	7	6	1700	2047	7	6	1866	1906	946.11	6	1886	295.1	8.205	1.51046e-88	2.53973e-87	0	0.0045	0.0041	0.0041	TRUE	NA
MGG_01361	565	511	1850	2077	550	508	2030	1934	1255.44	529	1982	3.747	1.906	1.76705e-88	2.96666e-87	0	0.0035	0.0032	0.0032	TRUE	NA
MGG_03236	20510	19892	10866	12713	19961	19763	11925	11837	15871.5	19862	11881	0.598	-0.741	2.11748e-88	3.54959e-87	0	0.0007	0.0006	0.0006	TRUE	NA
MGG_03773	859	915	51	83	836	909	56	77	469.58	872	66	0.077	-3.699	3.09974e-88	5.18831e-87	0.0057	0.0087	0.0085	0.0085	TRUE	NA
MGG_01625	26299	25588	14345	16735	25595	25422	15744	15581	20585.5	25508	15662	0.614	-0.704	7.24683e-88	1.21113e-86	0	0.0007	0.0006	0.0006	TRUE	NA
MGG_04852	140	158	984	1120	136	157	1080	1043	603.99	146	1062	7.241	2.856	1.11292e-87	1.85515e-86	0	0.0068	0.0061	0.0061	TRUE	NA
MGG_08262	4083	3962	1486	1766	3974	3936	1631	1644	2796.28	3955	1638	0.414	-1.272	1.11339e-87	1.85515e-86	0	0.0019	0.0015	0.0015	TRUE	NA
MGG_00901	3280	3062	5895	7011	3192	3042	6470	6528	4807.95	3117	6499	2.085	1.06	2.50155e-87	4.16184e-86	0.0001	0.0013	0.0011	0.0011	TRUE	NA
MGG_04732	1688	1610	352	361	1643	1600	386	336	991.2	1622	361	0.222	-2.169	3.64575e-87	6.05633e-86	0.0004	0.0044	0.0041	0.0041	TRUE	NA
MGG_00198	38580	35602	19624	22436	37547	35371	21537	20889	28836.2	36459	21213	0.582	-0.781	4.74374e-87	7.86848e-86	0.001	0.0006	0.0007	0.0007	TRUE	NA
MGG_05085	1539	1493	3407	3930	1498	1483	3739	3659	2594.85	1490	3699	2.481	1.311	5.0747e-87	8.40483e-86	0	0.002	0.0016	0.0016	TRUE	NA
MGG_04085	11645	10837	18321	20742	11333	10767	20107	19312	15379.9	11050	19710	1.783	0.835	5.35103e-87	8.84922e-86	0.0009	0.0007	0.0008	0.0008	TRUE	NA
MGG_01575	39812	38094	54278	65142	38746	37847	59570	60651	49203.6	38296	60110	1.57	0.65	7.13801e-87	1.17868e-85	0.0002	0.0006	0.0005	0.0005	TRUE	NA
MGG_02543	7	14	1009	1082	7	14	1107	1007	533.88	10	1057	102.347	6.677	5.47807e-86	9.03227e-85	0.0039	0.0077	0.0074	0.0074	TRUE	NA
MGG_06195	1365	1326	3055	3663	1328	1317	3353	3410	2352.3	1322	3382	2.556	1.354	8.34159e-86	1.37332e-84	0	0.0021	0.0018	0.0018	TRUE	NA
MGG_01041	6158	6052	2668	3054	5993	6013	2928	2843	4444.36	6003	2886	0.481	-1.057	1.25262e-85	2.05918e-84	0	0.0014	0.0011	0.0011	TRUE	NA
MGG_01268	3774	3849	1355	1641	3673	3824	1487	1528	2627.99	3748	1508	0.402	-1.314	3.56438e-85	5.85077e-84	0	0.002	0.0017	0.0017	TRUE	NA
MGG_01094	1050	1049	2573	3163	1022	1042	2824	2945	1958.23	1032	2884	2.796	1.483	3.95307e-85	6.47917e-84	0	0.0025	0.0021	0.0021	TRUE	NA
MGG_07268	7308	6956	3195	3787	7112	6911	3507	3526	5263.91	7012	3516	0.502	-0.996	6.58429e-85	1.07758e-83	0	0.0012	0.001	0.001	TRUE	NA
MGG_09719	937	1013	2623	2994	912	1006	2879	2788	1896.18	959	2834	2.954	1.563	9.54807e-85	1.56032e-83	0.0013	0.0025	0.0024	0.0024	TRUE	NA
MGG_16408	928	906	2350	2851	903	900	2579	2654	1759.22	902	2616	2.903	1.537	1.09911e-84	1.79348e-83	0	0.0027	0.0022	0.0022	TRUE	NA
MGG_01593	3844	3735	6599	7835	3741	3711	7242	7295	5497.29	3726	7268	1.951	0.964	1.48706e-84	2.42295e-83	0	0.0012	0.001	0.001	TRUE	NA
MGG_03755	24	26	639	814	23	26	701	758	377.1	24	730	29.69	4.892	1.86555e-84	3.03516e-83	0	0.0107	0.0096	0.0096	TRUE	NA
MGG_03840	1944	2008	503	567	1892	1995	552	528	1241.72	1944	540	0.278	-1.849	2.83146e-84	4.59988e-83	0	0.0036	0.0031	0.0031	TRUE	NA
MGG_09527	119470	118736	159270	190075	116270	117967	174799	176972	146502	117118	175886	1.502	0.587	2.94554e-84	4.77818e-83	0.0001	0.0005	0.0004	0.0004	TRUE	NA
MGG_15868	7845	7459	3470	4153	7635	7411	3808	3867	5680.15	7523	3838	0.51	-0.971	3.50313e-84	5.67434e-83	0	0.0012	0.001	0.001	TRUE	NA
MGG_02160	441	444	1568	1789	429	441	1721	1666	1064.22	435	1694	3.891	1.96	8.78555e-84	1.421e-82	0	0.0041	0.0035	0.0035	TRUE	NA
MGG_02654	244	225	1099	1368	237	224	1206	1274	735.22	230	1240	5.38	2.428	9.66687e-84	1.56126e-82	0	0.0057	0.005	0.005	TRUE	NA
MGG_00184	964	1053	2608	3134	938	1046	2862	2918	1941.15	992	2890	2.914	1.543	2.3255e-83	3.75033e-82	0.0017	0.0025	0.0024	0.0024	TRUE	NA
MGG_05217	3273	2975	5991	6919	3185	2956	6575	6442	4789.56	3070	6508	2.119	1.084	2.84667e-83	4.58413e-82	0.001	0.0013	0.0013	0.0013	TRUE	NA
MGG_05683	15138	15112	7773	9384	14733	15014	8531	8737	11753.7	14874	8634	0.581	-0.784	6.44341e-83	1.0361e-81	0.0001	0.0008	0.0007	0.0007	TRUE	NA
MGG_11547	2374	2447	4671	5662	2310	2431	5126	5272	3784.92	2370	5199	2.193	1.133	8.18767e-83	1.31467e-81	0.0004	0.0015	0.0014	0.0014	TRUE	NA
MGG_04248	2051	2055	537	653	1996	2042	589	608	1308.77	2019	598	0.297	-1.753	1.08199e-82	1.7348e-81	0	0.0034	0.0029	0.0029	TRUE	NA
MGG_08875	941	886	2393	2751	916	880	2626	2561	1745.94	898	2594	2.888	1.53	1.64121e-82	2.6276e-81	0	0.0027	0.0023	0.0023	TRUE	NA
MGG_01786	1579	1726	3701	4471	1537	1715	4062	4163	2869.04	1626	4112	2.53	1.339	1.65379e-82	2.64391e-81	0.0023	0.0018	0.0019	0.0019	TRUE	NA
MGG_06547	3167	3152	1084	1289	3082	3132	1190	1200	2150.9	3107	1195	0.385	-1.378	2.90719e-82	4.641e-81	0	0.0023	0.0019	0.0019	TRUE	NA
MGG_06316	7099	7000	3222	3823	6909	6955	3536	3559	5239.78	6932	3548	0.512	-0.966	3.2518e-82	5.18364e-81	0	0.0012	0.001	0.001	TRUE	NA
MGG_07212	56904	56911	32945	39167	55380	56542	36157	36467	46136.6	55961	36312	0.649	-0.624	3.90867e-82	6.22177e-81	0.0001	0.0006	0.0005	0.0005	TRUE	NA
MGG_03706	1228	1155	198	209	1195	1148	217	195	688.63	1172	206	0.175	-2.511	8.25809e-82	1.31262e-80	0	0.0061	0.0054	0.0054	TRUE	NA
MGG_12137	4696	4477	7703	9081	4570	4448	8454	8455	6481.82	4509	8454	1.875	0.907	1.26018e-81	2.00017e-80	0	0.0011	0.0009	0.0009	TRUE	NA
MGG_01104	8265	7866	12448	14773	8044	7815	13662	13755	10818.8	7930	13708	1.729	0.79	2.20153e-81	3.48929e-80	0.0001	0.0009	0.0007	0.0007	TRUE	NA
MGG_00942	2949	3085	872	1145	2870	3065	957	1066	1989.53	2968	1012	0.341	-1.551	2.44239e-81	3.86549e-80	0.0027	0.0024	0.0025	0.0025	TRUE	NA
MGG_09956	16817	18373	4103	5267	16367	18254	4503	4904	11006.9	17310	4704	0.272	-1.88	2.6477e-81	4.18443e-80	0.0045	0.0008	0.0014	0.0045	TRUE	NA
MGG_13253	951	901	2354	2777	926	895	2584	2586	1747.45	910	2585	2.839	1.505	3.40057e-81	5.36658e-80	0	0.0027	0.0023	0.0023	TRUE	NA
MGG_13993	1033	1046	142	169	1005	1039	156	157	589.44	1022	156	0.153	-2.706	4.37943e-81	6.9015e-80	0	0.007	0.006	0.006	TRUE	NA
MGG_05237	14171	13823	7311	8245	13791	13733	8024	7677	10806.3	13762	7850	0.57	-0.81	4.79555e-81	7.54649e-80	0.0003	0.0009	0.0008	0.0008	TRUE	NA
MGG_01230	19200	18774	10308	11646	18686	18652	11313	10843	14873.6	18669	11078	0.593	-0.753	1.99922e-80	3.14159e-79	0.0003	0.0008	0.0007	0.0007	TRUE	NA
MGG_08129	1237	1181	183	246	1204	1173	201	229	701.77	1188	215	0.181	-2.464	2.02297e-80	3.17439e-79	0	0.006	0.0053	0.0053	TRUE	NA
MGG_00062	8262	8367	12763	15333	8041	8313	14007	14276	11159.2	8177	14142	1.73	0.79	4.12314e-80	6.46076e-79	0.0002	0.0008	0.0007	0.0007	TRUE	NA
MGG_13765	3676	3525	1336	1570	3578	3502	1466	1462	2501.93	3540	1464	0.414	-1.274	5.12286e-80	8.01589e-79	0	0.002	0.0017	0.0017	TRUE	NA
MGG_09372	8154	7726	13045	14628	7936	7676	14317	13620	10887	7806	13968	1.789	0.839	5.16316e-80	8.06754e-79	0.0007	0.0008	0.0008	0.0008	TRUE	NA
MGG_13208	457	494	1702	1854	445	491	1868	1726	1132.43	468	1797	3.841	1.941	5.66215e-80	8.83471e-79	0.0026	0.0039	0.0037	0.0037	TRUE	NA
MGG_06685	12036	11743	6130	7218	11714	11667	6728	6720	9207.16	11690	6724	0.575	-0.798	6.54728e-80	1.02014e-78	0	0.0009	0.0007	0.0007	TRUE	NA
MGG_10440	5136	5209	2185	2468	4998	5175	2398	2298	3717.4	5086	2348	0.461	-1.116	1.1881e-79	1.84859e-78	0.0004	0.0015	0.0014	0.0014	TRUE	NA
MGG_15025	672	784	2252	2557	654	779	2472	2381	1571.31	716	2426	3.387	1.76	1.61974e-79	2.51663e-78	0.0061	0.0029	0.0033	0.0033	TRUE	NA
MGG_06269	28605	27953	16164	18826	27839	27772	17740	17528	22719.7	27806	17634	0.634	-0.657	1.98486e-79	3.07959e-78	0	0.0007	0.0005	0.0005	TRUE	NA
MGG_08405	456	403	1478	1884	444	400	1622	1754	1055.1	422	1688	4	2	2.17878e-79	3.37573e-78	0.0026	0.0041	0.0039	0.0039	TRUE	NA
MGG_14702	1044	1029	2544	2917	1016	1022	2792	2716	1886.58	1019	2754	2.702	1.434	4.56724e-79	7.06643e-78	0	0.0025	0.0021	0.0021	TRUE	NA
MGG_13049	3558	3309	1232	1353	3463	3288	1352	1260	2340.53	3376	1306	0.387	-1.371	6.39313e-79	9.87762e-78	0.0013	0.0021	0.002	0.002	TRUE	NA
MGG_06479	8254	7901	3868	4392	8033	7850	4245	4089	6054.28	7942	4167	0.525	-0.931	6.7238e-79	1.0374e-77	0.0003	0.0011	0.001	0.001	TRUE	NA
MGG_00969	11965	11964	6118	7282	11645	11886	6715	6780	9256.39	11766	6748	0.574	-0.802	8.3616e-79	1.28829e-77	0	0.0009	0.0008	0.0008	TRUE	NA
MGG_16259	17066	16916	23971	28732	16609	16806	26308	26751	21618.7	16708	26530	1.588	0.667	9.55033e-79	1.46939e-77	0.0001	0.0007	0.0006	0.0006	TRUE	NA
MGG_11785	19225	18309	10030	11226	18710	18190	11008	10452	14590.1	18450	10730	0.581	-0.782	1.57475e-78	2.41952e-77	0.0007	0.0008	0.0008	0.0008	TRUE	NA
MGG_07753	17842	17779	9594	11471	17364	17664	10529	10680	14059.4	17514	10604	0.606	-0.724	1.81885e-78	2.79067e-77	0	0.0008	0.0006	0.0006	TRUE	NA
MGG_04436	19615	18680	10353	12314	19090	18559	11362	11465	15119	18824	11414	0.606	-0.722	3.09609e-78	4.74375e-77	0.0002	0.0007	0.0006	0.0006	TRUE	NA
MGG_10660	27778	28218	39415	48060	27034	28035	43258	44747	35768.6	27534	44002	1.598	0.676	6.9499e-78	1.06337e-76	0.0006	0.0006	0.0006	0.0006	TRUE	NA
MGG_09371	1780	1752	3574	4265	1732	1741	3922	3971	2841.61	1736	3946	2.273	1.185	7.51178e-78	1.14775e-76	0	0.0018	0.0015	0.0015	TRUE	NA
MGG_05129	15727	15186	8199	9183	15306	15088	8998	8550	11985.4	15197	8774	0.577	-0.793	8.17648e-78	1.24759e-76	0.0005	0.0008	0.0008	0.0008	TRUE	NA
MGG_02625	19495	19179	10582	12659	18973	19055	11614	11786	15356.9	19014	11700	0.615	-0.7	9.31238e-78	1.41895e-76	0	0.0007	0.0006	0.0006	TRUE	NA
MGG_06537	6975	6818	3219	3788	6788	6774	3533	3527	5155.43	6781	3530	0.521	-0.942	1.12074e-77	1.70535e-76	0	0.0012	0.001	0.001	TRUE	NA
MGG_02659	18757	18201	10203	11927	18255	18083	11198	11105	14660.1	18169	11152	0.614	-0.704	1.7116e-77	2.60084e-76	0	0.0008	0.0006	0.0006	TRUE	NA
MGG_04024	1751	1747	3581	4555	1704	1736	3930	4241	2902.74	1720	4086	2.376	1.249	1.75757e-77	2.66701e-76	0.0014	0.0018	0.0017	0.0017	TRUE	NA
MGG_13309	16	10	717	810	16	10	787	754	391.64	13	770	60.283	5.914	2.04385e-77	3.09717e-76	0	0.0103	0.0093	0.0093	TRUE	NA
MGG_03379	173	175	957	1080	168	174	1050	1006	599.52	171	1028	6.006	2.586	2.43315e-77	3.68206e-76	0	0.0069	0.0059	0.0059	TRUE	NA
MGG_16392	12051	10921	5500	6304	11728	10850	6036	5869	8621.04	11289	5952	0.527	-0.924	3.97807e-77	6.01173e-76	0.0015	0.0009	0.0011	0.0011	TRUE	NA
MGG_00176	78	65	699	796	76	65	767	741	412.19	70	754	10.728	3.423	5.77396e-77	8.71379e-76	0	0.0098	0.0087	0.0087	TRUE	NA
MGG_16375	24230	22378	35250	40127	23581	22233	38687	37361	30465.5	22907	38024	1.66	0.731	6.41772e-77	9.67211e-76	0.0011	0.0006	0.0007	0.0007	TRUE	NA
MGG_06057	4074	3754	6779	8285	3965	3730	7440	7714	5712.1	3848	7577	1.97	0.978	1.21963e-76	1.8356e-75	0.0009	0.0012	0.0011	0.0011	TRUE	NA
MGG_00565	92	101	837	852	90	100	919	793	475.44	95	856	9.012	3.172	2.37948e-76	3.57635e-75	0	0.0086	0.0084	0.0084	TRUE	NA
MGG_16248	21150	19852	11120	13073	20583	19723	12204	12172	16170.7	20153	12188	0.605	-0.726	4.41126e-76	6.62109e-75	0.0003	0.0007	0.0007	0.0007	TRUE	NA
MGG_15413	8	7	1006	1190	8	7	1104	1108	556.7	8	1106	149.987	7.229	4.61987e-76	6.92479e-75	0	0.0074	0.0066	0.0066	TRUE	NA
MGG_10320	2801	2649	906	1071	2726	2632	994	997	1837.33	2679	996	0.372	-1.428	5.49462e-76	8.22481e-75	0	0.0026	0.0022	0.0022	TRUE	NA
MGG_08190	26815	24688	13815	15849	26097	24528	15162	14756	20135.8	25312	14959	0.591	-0.759	7.08093e-76	1.0585e-74	0.001	0.0007	0.0008	0.0008	TRUE	NA
MGG_12986	2907	2983	5291	6338	2829	2964	5807	5901	4375.2	2896	5854	2.021	1.015	1.31156e-75	1.95795e-74	0.0002	0.0014	0.0012	0.0012	TRUE	NA
MGG_09647	21	8	3559	4071	20	8	3906	3790	1931.19	14	3848	270.466	8.079	1.3402e-75	1.998e-74	0.058	0.0025	0.0023	0.058	TRUE	NA
MGG_09236	3627	3804	1279	1625	3530	3779	1404	1513	2556.47	3654	1458	0.399	-1.324	1.4742e-75	2.19481e-74	0.0021	0.002	0.002	0.002	TRUE	NA
MGG_02660	12509	12662	6557	7484	12174	12580	7196	6968	9729.58	12377	7082	0.572	-0.806	1.59576e-75	2.3726e-74	0.0003	0.0009	0.0008	0.0008	TRUE	NA
MGG_16630	4580	4489	1909	2167	4457	4460	2095	2018	3257.5	4458	2056	0.461	-1.117	1.62831e-75	2.41773e-74	0	0.0017	0.0014	0.0014	TRUE	NA
MGG_05062	3667	3631	6221	7296	3569	3607	6828	6793	5199.22	3588	6810	1.898	0.924	3.45736e-75	5.12664e-74	0	0.0012	0.001	0.001	TRUE	NA
MGG_06693	15958	15890	8468	10236	15531	15787	9294	9530	12535.4	15659	9412	0.601	-0.734	3.68907e-75	5.46288e-74	0.0001	0.0008	0.0007	0.0007	TRUE	NA
MGG_01414	2637	2655	877	1039	2566	2638	963	967	1783.51	2602	965	0.371	-1.431	5.82241e-75	8.61047e-74	0	0.0026	0.0022	0.0022	TRUE	NA
MGG_09986	1212	1272	2813	3326	1180	1264	3087	3097	2156.82	1222	3092	2.531	1.34	1.09914e-74	1.62329e-73	0	0.0023	0.002	0.002	TRUE	NA
MGG_12091	13	15	608	915	13	15	667	852	386.69	14	760	55.23	5.787	1.3033e-74	1.92224e-73	0	0.0104	0.0118	0.0118	TRUE	NA
MGG_07605	95	117	804	892	92	116	882	831	480.4	104	856	8.21	3.037	1.73939e-74	2.562e-73	0.0018	0.0085	0.008	0.008	TRUE	NA
MGG_02919	931	858	109	131	906	852	120	122	500.03	879	121	0.137	-2.863	2.25586e-74	3.31831e-73	0	0.0082	0.0071	0.0071	TRUE	NA
MGG_05092	5473	5015	8986	10218	5326	4983	9862	9514	7421.18	5154	9688	1.879	0.91	2.42782e-74	3.5665e-73	0.0011	0.001	0.001	0.001	TRUE	NA
MGG_12828	3007	2827	5196	6351	2926	2809	5703	5913	4337.74	2868	5808	2.026	1.018	3.73333e-74	5.47703e-73	0.0005	0.0014	0.0012	0.0012	TRUE	NA
MGG_09210	1905	2067	4053	4929	1854	2054	4448	4589	3236.25	1954	4518	2.313	1.21	3.80091e-74	5.56879e-73	0.0021	0.0017	0.0018	0.0018	TRUE	NA
MGG_15011	43604	41977	57915	67280	42436	41705	63562	62642	52586.3	42070	63102	1.5	0.585	5.41092e-74	7.91714e-73	0.0001	0.0006	0.0005	0.0005	TRUE	NA
MGG_03374	466	410	1449	1751	454	407	1590	1630	1020.36	430	1610	3.741	1.903	1.38858e-73	2.02905e-72	0.0001	0.0043	0.0038	0.0038	TRUE	NA
MGG_04368	470	432	1445	1771	457	429	1586	1649	1030.36	443	1618	3.649	1.867	1.46137e-73	2.13259e-72	0	0.0042	0.0037	0.0037	TRUE	NA
MGG_16880	1277	1312	2829	3407	1243	1304	3105	3172	2205.82	1274	3138	2.466	1.302	1.49675e-73	2.18134e-72	0	0.0022	0.0019	0.0019	TRUE	NA
MGG_06312	2884	2794	5010	6094	2807	2776	5498	5674	4188.76	2792	5586	2.002	1.001	2.16721e-73	3.1543e-72	0	0.0014	0.0012	0.0012	TRUE	NA
MGG_03007	4008	4018	6660	8182	3901	3992	7309	7618	5704.99	3946	7464	1.892	0.92	2.36094e-73	3.43175e-72	0.0004	0.0012	0.001	0.001	TRUE	NA
MGG_01931	12684	12030	18406	21065	12344	11952	20201	19613	16027.5	12148	19907	1.638	0.712	2.89022e-73	4.19557e-72	0.0003	0.0007	0.0007	0.0007	TRUE	NA
MGG_02254	6552	5955	2672	2869	6376	5916	2933	2671	4474.17	6146	2802	0.456	-1.134	4.19925e-73	6.08781e-72	0.0031	0.0014	0.0016	0.0016	TRUE	NA
MGG_12847	290987	258412	89821	99703	283192	256738	98579	92830	182835	269965	95704	0.355	-1.496	6.08002e-73	8.80288e-72	0.0033	0.0005	0.001	0.0033	TRUE	NA
MGG_16149	91873	89415	55604	65019	89412	88836	61026	60537	74952.6	89124	60782	0.682	-0.552	8.22851e-73	1.1898e-71	0	0.0005	0.0004	0.0004	TRUE	NA
MGG_02403	14	21	579	698	14	21	635	650	329.96	18	642	37.34	5.223	1.03959e-72	1.50122e-71	0	0.0121	0.0109	0.0109	TRUE	NA
MGG_00194	172369	157953	93729	106748	167752	156930	102868	99389	131735	162341	101128	0.623	-0.683	1.10825e-72	1.59828e-71	0.0014	0.0005	0.0007	0.0007	TRUE	NA
MGG_02425	5045	5067	2160	2621	4910	5034	2371	2440	3688.74	4972	2406	0.484	-1.047	1.16775e-72	1.68189e-71	0	0.0015	0.0013	0.0013	TRUE	NA
MGG_00067	4433	4532	7352	8782	4314	4503	8069	8177	6265.59	4408	8123	1.843	0.882	1.33542e-72	1.92088e-71	0.0002	0.0011	0.001	0.001	TRUE	NA
MGG_13530	3477	3441	5839	7051	3384	3419	6408	6565	4943.96	3402	6486	1.907	0.932	2.10304e-72	3.0211e-71	0	0.0013	0.0011	0.0011	TRUE	NA
MGG_06489	5409	5618	2309	2844	5264	5582	2534	2648	4006.95	5423	2591	0.478	-1.065	3.43177e-72	4.92347e-71	0.0011	0.0015	0.0014	0.0014	TRUE	NA
MGG_05078	233	160	3575	4221	227	159	3924	3930	2059.83	193	3927	20.355	4.347	3.59683e-72	5.15359e-71	0.0255	0.0024	0.0028	0.0255	TRUE	NA
MGG_03920	47137	48318	65377	77573	45874	48005	71751	72226	59464.1	46940	71988	1.534	0.617	4.31223e-72	6.17062e-71	0.0005	0.0006	0.0005	0.0005	TRUE	NA
MGG_03900	5313	5262	2375	2764	5171	5228	2607	2573	3894.66	5200	2590	0.498	-1.006	6.21733e-72	8.88523e-71	0	0.0015	0.0012	0.0012	TRUE	NA
MGG_06511	1900	2029	534	640	1849	2016	586	596	1261.73	1932	591	0.306	-1.709	7.8817e-72	1.12492e-70	0	0.0035	0.0033	0.0033	TRUE	NA
MGG_09995	74	76	701	744	72	76	769	693	402.4	74	731	9.906	3.308	1.36106e-71	1.94007e-70	0	0.01	0.0091	0.0091	TRUE	NA
MGG_11724	658	593	1832	2058	640	589	2011	1916	1289.07	614	1964	3.192	1.675	1.37347e-71	1.95524e-70	0.0009	0.0035	0.0032	0.0032	TRUE	NA
MGG_08415	1672	1467	313	424	1627	1457	344	395	955.75	1542	370	0.24	-2.06	1.40502e-71	1.99759e-70	0.0059	0.0045	0.0047	0.0047	TRUE	NA
MGG_04449	2222	2157	640	810	2162	2143	702	754	1440.52	2152	728	0.339	-1.562	2.01224e-71	2.85722e-70	0	0.0032	0.0027	0.0027	TRUE	NA
MGG_04444	19416	18493	10500	11877	18896	18373	11524	11058	14962.8	18634	11291	0.606	-0.723	2.04681e-71	2.90258e-70	0.0005	0.0008	0.0007	0.0007	TRUE	NA
MGG_03653	20972	19982	11426	13590	20410	19853	12540	12653	16364	20132	12596	0.626	-0.676	3.5716e-71	5.05839e-70	0.0002	0.0007	0.0006	0.0006	TRUE	NA
MGG_07442	3441	3681	6502	7436	3349	3657	7136	6923	5266.34	3503	7030	2.007	1.005	3.98604e-71	5.63812e-70	0.0017	0.0012	0.0013	0.0013	TRUE	NA
MGG_02082	10	2	1096	1327	10	2	1203	1236	612.53	6	1220	206.735	7.692	1.09474e-70	1.5465e-69	0	0.0068	0.0062	0.0062	TRUE	NA
MGG_06185	12255	12234	6561	7650	11927	12155	7201	7123	9601.21	12041	7162	0.595	-0.75	1.23546e-70	1.74306e-69	0	0.0009	0.0007	0.0007	TRUE	NA
MGG_07752	42900	42615	25597	30055	41751	42339	28093	27983	35041.4	42045	28038	0.667	-0.585	1.34313e-70	1.89254e-69	0	0.0006	0.0005	0.0005	TRUE	NA
MGG_04484	21794	21075	12285	14263	21210	20938	13483	13280	17227.8	21074	13382	0.635	-0.655	1.44499e-70	2.03348e-69	0	0.0007	0.0006	0.0006	TRUE	NA
MGG_02269	305	241	1135	1459	297	239	1246	1358	785.09	268	1302	4.856	2.28	2.83246e-70	3.98094e-69	0.0088	0.0054	0.0057	0.0057	TRUE	NA
MGG_10484	1624	1825	417	476	1580	1813	458	443	1073.63	1696	450	0.265	-1.914	3.31667e-70	4.65556e-69	0.0049	0.0041	0.0042	0.0042	TRUE	NA
MGG_01802	3733	3866	6397	7860	3633	3841	7021	7318	5453.22	3737	7170	1.919	0.94	1.426e-69	1.99912e-68	0.0008	0.0012	0.0012	0.0012	TRUE	NA
MGG_01372	355	365	1247	1483	345	363	1369	1381	864.37	354	1375	3.883	1.957	1.58136e-69	2.21411e-68	0	0.0049	0.0042	0.0042	TRUE	NA
MGG_16720	14	18	657	625	14	18	721	582	333.62	16	652	41.362	5.37	2.28127e-69	3.19003e-68	0	0.012	0.0127	0.0127	TRUE	NA
MGG_02570	3964	3999	1645	1926	3858	3973	1805	1793	2857.38	3916	1799	0.46	-1.122	2.84831e-69	3.97792e-68	0	0.0018	0.0015	0.0015	TRUE	NA
MGG_00504	1600	1597	3198	3802	1557	1587	3510	3540	2548.38	1572	3525	2.243	1.165	4.31816e-69	6.02308e-68	0	0.002	0.0017	0.0017	TRUE	NA
MGG_03251	18687	18587	10580	12379	18186	18467	11612	11526	14947.6	18326	11569	0.631	-0.664	5.6337e-69	7.8481e-68	0	0.0008	0.0006	0.0006	TRUE	NA
MGG_02916	3774	3425	6883	7473	3673	3403	7554	6958	5396.92	3538	7256	2.05	1.036	7.95657e-69	1.10701e-67	0.0027	0.0012	0.0015	0.0015	TRUE	NA
MGG_04426	2400	2493	816	922	2336	2477	896	858	1641.64	2406	877	0.364	-1.457	8.42495e-69	1.1707e-67	0	0.0028	0.0025	0.0025	TRUE	NA
MGG_02690	7297	6866	3110	3950	7102	6822	3413	3678	5253.5	6962	3546	0.51	-0.973	9.59615e-69	1.33177e-67	0.0014	0.0012	0.0013	0.0013	TRUE	NA
MGG_15739	15868	15276	8447	10218	15443	15177	9271	9514	12351.1	15310	9392	0.614	-0.705	1.00188e-68	1.38868e-67	0.0001	0.0008	0.0007	0.0007	TRUE	NA
MGG_15026	573	531	1635	1851	558	528	1794	1723	1150.76	543	1758	3.24	1.696	1.61501e-68	2.23572e-67	0	0.0038	0.0033	0.0033	TRUE	NA
MGG_13246	1625	1544	3159	3861	1581	1534	3467	3595	2544.33	1558	3531	2.267	1.181	1.68006e-68	2.32285e-67	0	0.002	0.0017	0.0017	TRUE	NA
MGG_03774	941	902	142	158	916	896	156	147	528.73	906	152	0.167	-2.582	2.23802e-68	3.09042e-67	0	0.0077	0.0066	0.0066	TRUE	NA
MGG_09080	5430	5124	2287	2814	5285	5091	2510	2620	3876.34	5188	2565	0.495	-1.016	4.16445e-68	5.74341e-67	0.0005	0.0015	0.0013	0.0013	TRUE	NA
MGG_03358	398	430	1365	1594	387	427	1498	1484	949.19	407	1491	3.662	1.872	4.95394e-68	6.82371e-67	0	0.0045	0.004	0.004	TRUE	NA
MGG_03252	36254	36066	21528	25510	35283	35832	23627	23751	29623.5	35558	23689	0.666	-0.586	9.62121e-68	1.32361e-66	0	0.0006	0.0005	0.0005	TRUE	NA
MGG_10300	27	14	546	620	26	14	599	577	304.17	20	588	29.197	4.868	1.2388e-67	1.70211e-66	0	0.0131	0.0124	0.0124	TRUE	NA
MGG_09198	700	616	43	61	681	612	47	57	349.31	646	52	0.081	-3.63	2.16652e-67	2.97312e-66	0	0.0115	0.0106	0.0106	TRUE	NA
MGG_03351	36	18	539	638	35	18	592	594	309.62	26	593	22.348	4.482	3.28723e-67	4.50547e-66	0.0355	0.0129	0.0128	0.0128	TRUE	NA
MGG_13009	7963	7339	3680	4127	7750	7291	4039	3843	5730.62	7520	3941	0.524	-0.933	3.42986e-67	4.69512e-66	0.0012	0.0012	0.0012	0.0012	TRUE	NA
MGG_05825	95	78	641	817	92	77	703	761	408.53	84	732	8.615	3.107	4.80763e-67	6.57301e-66	0	0.0099	0.009	0.009	TRUE	NA
MGG_15354	1463	1384	349	395	1424	1375	383	368	887.41	1400	376	0.268	-1.899	6.5137e-67	8.89455e-66	0	0.0048	0.0041	0.0041	TRUE	NA
MGG_08451	42	20	7472	8224	41	20	8201	7657	3979.59	30	7929	260.798	8.027	9.61564e-67	1.31141e-65	0.0877	0.0015	0.0016	0.0877	TRUE	NA
MGG_08808	2890	2635	4921	6052	2813	2618	5401	5635	4116.54	2716	5518	2.032	1.023	1.47822e-66	2.01355e-65	0.0012	0.0014	0.0014	0.0014	TRUE	NA
MGG_16739	22398	22999	12445	15085	21798	22850	13658	14045	18087.9	22324	13852	0.621	-0.688	1.48208e-66	2.01633e-65	0.0006	0.0007	0.0007	0.0007	TRUE	NA
MGG_08025	1391	1334	2798	3502	1354	1325	3071	3261	2252.63	1340	3166	2.364	1.241	2.50069e-66	3.39793e-65	0	0.0022	0.002	0.002	TRUE	NA
MGG_09458	1758	1866	3552	4313	1711	1854	3898	4016	2869.71	1782	3957	2.221	1.151	2.65892e-66	3.60848e-65	0.001	0.0018	0.0017	0.0017	TRUE	NA
MGG_00438	1790	1724	3392	3995	1742	1713	3723	3720	2724.31	1728	3722	2.154	1.107	2.79033e-66	3.78218e-65	0	0.0019	0.0016	0.0016	TRUE	NA
MGG_06849	1448	1328	3012	3391	1409	1319	3306	3157	2297.88	1364	3232	2.368	1.244	4.26831e-66	5.77843e-65	0.001	0.0022	0.002	0.002	TRUE	NA
MGG_03185	69168	64905	39992	45869	67315	64485	43891	42707	54599.5	65900	43299	0.657	-0.606	4.31616e-66	5.83606e-65	0.0006	0.0006	0.0006	0.0006	TRUE	NA
MGG_09728	1735	1591	3398	3875	1689	1581	3729	3608	2651.6	1635	3668	2.244	1.166	5.27319e-66	7.12139e-65	0.0007	0.0019	0.0018	0.0018	TRUE	NA
MGG_04369	158	138	838	916	154	137	920	853	515.86	146	886	6.09	2.606	5.55294e-66	7.49002e-65	0	0.0079	0.0071	0.0071	TRUE	NA
MGG_08627	170	146	801	1032	165	145	879	961	537.62	155	920	5.927	2.567	5.77574e-66	7.78105e-65	0	0.0076	0.007	0.007	TRUE	NA
MGG_04126	36	30	496	639	35	30	544	595	301.04	32	570	17.569	4.135	8.30584e-66	1.1176e-64	0	0.0132	0.0119	0.0119	TRUE	NA
MGG_02544	1403	1310	325	354	1365	1302	357	330	838.3	1334	344	0.257	-1.96	1.26955e-65	1.70617e-64	0	0.0051	0.0045	0.0045	TRUE	NA
MGG_12890	3915	3798	1584	1929	3810	3773	1738	1796	2779.5	3792	1767	0.466	-1.101	1.60551e-65	2.15505e-64	0	0.0019	0.0016	0.0016	TRUE	NA
MGG_06053	1185	1151	2570	2933	1153	1144	2821	2731	1962.05	1148	2776	2.416	1.273	3.11205e-65	4.17219e-64	0	0.0024	0.0021	0.0021	TRUE	NA
MGG_00683	9260	9217	13187	15908	9012	9157	14473	14811	11863.4	9084	14642	1.612	0.689	3.27619e-65	4.38692e-64	0.0001	0.0008	0.0007	0.0007	TRUE	NA
MGG_00133	2179	2183	4077	4646	2121	2169	4475	4326	3272.44	2145	4400	2.051	1.037	3.60366e-65	4.81957e-64	0	0.0017	0.0014	0.0014	TRUE	NA
MGG_12750	4676	4443	7198	8525	4551	4414	7900	7937	6200.53	4482	7918	1.767	0.821	3.72469e-65	4.97542e-64	0	0.0011	0.0009	0.0009	TRUE	NA
MGG_07211	6521	6504	2928	3706	6346	6462	3213	3451	4868.05	6404	3332	0.521	-0.942	4.87538e-65	6.50463e-64	0.0009	0.0013	0.0012	0.0012	TRUE	NA
MGG_13563	15659	15419	8678	10400	15240	15319	9524	9683	12441.5	15280	9604	0.629	-0.67	5.272e-65	7.0253e-64	0	0.0008	0.0007	0.0007	TRUE	NA
MGG_04616	4109	4182	6669	7892	3999	4155	7319	7348	5705.27	4077	7334	1.799	0.847	9.85919e-65	1.31222e-63	0	0.0012	0.001	0.001	TRUE	NA
MGG_13186	1522	1541	3056	3590	1481	1531	3354	3343	2427.19	1506	3348	2.223	1.153	1.47236e-64	1.9573e-63	0	0.0021	0.0017	0.0017	TRUE	NA
MGG_06409	4292	4311	6847	8043	4177	4283	7515	7489	5865.82	4230	7502	1.773	0.827	1.67976e-64	2.23033e-63	0	0.0011	0.001	0.001	TRUE	NA
MGG_15992	549	523	1541	1763	534	520	1691	1641	1096.66	527	1666	3.162	1.661	1.73568e-64	2.3018e-63	0	0.004	0.0034	0.0034	TRUE	NA
MGG_02156	12564	12347	17470	20258	12227	12267	19173	18862	15632.4	12247	19018	1.553	0.635	1.74572e-64	2.31234e-63	0	0.0007	0.0006	0.0006	TRUE	NA
MGG_04071	14	5	635	721	14	5	697	671	346.7	10	684	73.256	6.195	1.75555e-64	2.32258e-63	0	0.0115	0.0107	0.0107	TRUE	NA
MGG_05855	47	58	608	627	46	58	667	584	338.61	52	626	12.104	3.597	2.41431e-64	3.1903e-63	0	0.0118	0.0113	0.0113	TRUE	NA
MGG_09484	758	821	1952	2427	738	816	2142	2260	1488.85	777	2201	2.835	1.503	3.73573e-64	4.93054e-63	0.002	0.0031	0.0029	0.0029	TRUE	NA
MGG_04921	8811	8739	4383	5401	8575	8682	4810	5029	6774.1	8628	4920	0.57	-0.81	4.30925e-64	5.6807e-63	0.0002	0.0011	0.0009	0.0009	TRUE	NA
MGG_14269	21935	18827	81870	86457	21347	18705	89853	80497	52600.6	20026	85175	4.253	2.089	4.48698e-64	5.90795e-63	0.0073	0.0006	0.0015	0.0073	TRUE	NA
MGG_05164	6365	6091	9316	11042	6195	6052	10224	10281	8187.8	6124	10252	1.674	0.744	5.91447e-64	7.77823e-63	0	0.001	0.0008	0.0008	TRUE	NA
MGG_10680	16727	15987	9067	10945	16279	15883	9951	10191	13076	16081	10071	0.626	-0.675	6.39814e-64	8.40431e-63	0.0002	0.0008	0.0007	0.0007	TRUE	NA
MGG_03864	532	550	1519	1799	518	546	1667	1675	1101.57	532	1671	3.141	1.651	7.04269e-64	9.23998e-63	0	0.004	0.0034	0.0034	TRUE	NA
MGG_06302	15437	15437	21423	26614	15023	15337	23512	24779	19662.9	15180	24146	1.591	0.67	7.4407e-64	9.75059e-63	0.0007	0.0007	0.0007	0.0007	TRUE	NA
MGG_04110	6891	6455	3253	3692	6706	6413	3570	3437	5031.82	6560	3504	0.534	-0.905	7.99091e-64	1.04592e-62	0.0007	0.0013	0.0012	0.0012	TRUE	NA
MGG_01382	461	435	1374	1581	449	432	1508	1472	965.2	440	1490	3.382	1.758	1.04384e-63	1.36466e-62	0	0.0045	0.0038	0.0038	TRUE	NA
MGG_17810	949	812	130	138	924	807	143	128	500.37	866	136	0.156	-2.677	1.30268e-63	1.70102e-62	0	0.0082	0.0078	0.0078	TRUE	NA
MGG_12767	13832	13340	7314	8937	13461	13254	8027	8321	10765.8	13358	8174	0.612	-0.708	1.46053e-63	1.90489e-62	0.0002	0.0009	0.0008	0.0008	TRUE	NA
MGG_08772	827	731	1942	2325	805	726	2131	2165	1456.8	766	2148	2.806	1.488	1.7471e-63	2.27597e-62	0.0009	0.0031	0.0029	0.0029	TRUE	NA
MGG_00221	19613	17586	9768	11134	19088	17472	10720	10366	14411.6	18280	10543	0.577	-0.794	1.8087e-63	2.35345e-62	0.0021	0.0008	0.001	0.001	TRUE	NA
MGG_07037	2056	2172	3929	4733	2001	2158	4312	4407	3219.42	2080	4360	2.097	1.068	2.69294e-63	3.49988e-62	0.0008	0.0017	0.0016	0.0016	TRUE	NA
MGG_05753	12013	11935	17245	19610	11691	11858	18926	18258	15183.4	11774	18592	1.579	0.659	3.17854e-63	4.12613e-62	0.0002	0.0007	0.0007	0.0007	TRUE	NA
MGG_15688	4685	4455	2055	2284	4560	4426	2255	2127	3341.89	4493	2191	0.487	-1.037	4.69413e-63	6.08639e-62	0.0006	0.0016	0.0015	0.0015	TRUE	NA
MGG_09649	346	263	1253	1380	337	261	1375	1285	814.52	299	1330	4.445	2.152	5.0939e-63	6.59699e-62	0.013	0.0052	0.0059	0.0059	TRUE	NA
MGG_05722	638	598	1693	1904	621	594	1858	1773	1211.46	608	1816	2.987	1.579	5.35441e-63	6.92625e-62	0	0.0037	0.0032	0.0032	TRUE	NA
MGG_03554	8641	8742	4494	5024	8410	8685	4932	4678	6676.19	8548	4805	0.562	-0.831	6.21099e-63	8.02489e-62	0.0006	0.0011	0.001	0.001	TRUE	NA
MGG_03121	4949	5144	7946	9783	4816	5111	8721	9109	6939.12	4964	8915	1.796	0.845	6.62101e-63	8.54467e-62	0.001	0.001	0.0011	0.0011	TRUE	NA
MGG_00349	13131	12330	6923	7813	12779	12250	7598	7274	9975.46	12514	7436	0.594	-0.751	2.41822e-62	3.11716e-61	0.0007	0.0009	0.0009	0.0009	TRUE	NA
MGG_05449	19183	18678	10949	13052	18669	18557	12017	12152	15348.8	18613	12084	0.649	-0.623	2.70724e-62	3.48566e-61	0	0.0007	0.0006	0.0006	TRUE	NA
MGG_02471	8804	8489	4529	5352	8568	8434	4971	4983	6738.96	8501	4977	0.585	-0.772	2.94906e-62	3.79258e-61	0	0.0011	0.0009	0.0009	TRUE	NA
MGG_07708	3136	3213	1268	1442	3052	3192	1392	1343	2244.6	3122	1368	0.438	-1.192	3.92279e-62	5.03896e-61	0	0.0022	0.0019	0.0019	TRUE	NA
MGG_02516	4394	4393	6875	8103	4276	4365	7545	7544	5932.65	4320	7544	1.746	0.804	4.06748e-62	5.21875e-61	0	0.0011	0.0009	0.0009	TRUE	NA
MGG_03544	60	67	538	716	58	67	590	667	345.51	62	628	10.071	3.332	8.78587e-62	1.12596e-60	0	0.0116	0.0107	0.0107	TRUE	NA
MGG_03213	32	40	492	582	31	40	540	542	288.18	36	541	15.276	3.933	1.1137e-61	1.42561e-60	0	0.0138	0.0122	0.0122	TRUE	NA
MGG_03837	3603	3187	5938	6990	3506	3166	6517	6508	4924.49	3336	6512	1.952	0.965	1.70247e-61	2.17676e-60	0.0021	0.0013	0.0014	0.0014	TRUE	NA
MGG_09522	649	641	1631	2059	632	637	1790	1917	1243.89	634	1854	2.924	1.548	2.3084e-61	2.94807e-60	0	0.0036	0.0032	0.0032	TRUE	NA
MGG_06259	3708	3632	5839	7013	3609	3608	6408	6530	5038.76	3608	6469	1.793	0.842	3.87856e-61	4.94762e-60	0	0.0013	0.001	0.001	TRUE	NA
MGG_09507	4697	4792	7343	8951	4571	4761	8059	8334	6431.27	4666	8196	1.757	0.813	3.92413e-61	4.99999e-60	0.0005	0.0011	0.001	0.001	TRUE	NA
MGG_09195	4293	4255	1783	2255	4178	4227	1957	2100	3115.46	4202	2028	0.483	-1.05	4.59069e-61	5.84255e-60	0.0005	0.0017	0.0016	0.0016	TRUE	NA
MGG_15990	6882	6331	10372	11796	6698	6290	11383	10983	8838.45	6494	11183	1.722	0.784	4.86039e-61	6.17868e-60	0.0011	0.0009	0.001	0.001	TRUE	NA
MGG_13014	31825	31805	41342	49231	30973	31599	45373	45837	38445.4	31286	45605	1.458	0.544	7.44436e-61	9.45263e-60	0.0001	0.0006	0.0005	0.0005	TRUE	NA
MGG_04209	505	460	1380	1825	491	457	1515	1699	1040.56	474	1607	3.39	1.761	7.58563e-61	9.62094e-60	0.004	0.0042	0.0042	0.0042	TRUE	NA
MGG_10057	1594	1640	3094	3791	1551	1629	3396	3530	2526.51	1590	3463	2.178	1.123	1.53384e-60	1.94316e-59	0.0005	0.002	0.0018	0.0018	TRUE	NA
MGG_03326	7803	7509	3969	4475	7594	7460	4356	4167	5894.21	7527	4262	0.566	-0.821	1.6762e-60	2.12107e-59	0.0003	0.0011	0.001	0.001	TRUE	NA
MGG_08895	7421	7333	3821	4419	7222	7285	4194	4114	5703.91	7254	4154	0.573	-0.804	1.74208e-60	2.20191e-59	0	0.0012	0.001	0.001	TRUE	NA
MGG_10185	21190	20598	12185	14628	20622	20465	13373	13620	17019.9	20544	13496	0.657	-0.606	1.96281e-60	2.47807e-59	0	0.0007	0.0006	0.0006	TRUE	NA
MGG_11804	2250	2123	3971	4566	2190	2109	4358	4251	3227.1	2150	4304	2.002	1.002	3.11196e-60	3.92441e-59	0	0.0017	0.0015	0.0015	TRUE	NA
MGG_02441	7909	7637	3819	4753	7697	7588	4191	4425	5975.35	7642	4308	0.564	-0.826	3.81556e-60	4.80621e-59	0.0004	0.0011	0.001	0.001	TRUE	NA
MGG_11945	705	681	1755	2003	686	677	1926	1865	1288.44	682	1896	2.781	1.476	3.9982e-60	5.03054e-59	0	0.0035	0.0029	0.0029	TRUE	NA
MGG_08328	61	45	597	598	59	45	655	557	329.02	52	606	11.626	3.539	4.4804e-60	5.63082e-59	0.0131	0.0121	0.0122	0.0122	TRUE	NA
MGG_09648	25	41	474	610	24	41	520	568	288.31	32	544	16.762	4.067	4.66361e-60	5.85442e-59	0.0075	0.0138	0.0137	0.0137	TRUE	NA
MGG_08017	8835	8785	12378	14897	8598	8728	13585	13870	11195.4	8663	13728	1.585	0.664	1.042e-59	1.30658e-58	0	0.0008	0.0007	0.0007	TRUE	NA
MGG_03530	3394	3181	5458	6344	3303	3160	5990	5907	4590.08	3232	5948	1.84	0.88	1.06406e-59	1.33272e-58	0.0002	0.0013	0.0012	0.0012	TRUE	NA
MGG_10532	2679	2691	1027	1105	2607	2674	1127	1029	1859.19	2640	1078	0.408	-1.294	1.31212e-59	1.64156e-58	0.0009	0.0026	0.0024	0.0024	TRUE	NA
MGG_13438	9498	8981	4886	5791	9244	8923	5362	5392	7230.15	9084	5377	0.592	-0.756	1.47122e-59	1.83853e-58	0.0002	0.001	0.0009	0.0009	TRUE	NA
MGG_14068	862	914	2040	2446	839	908	2239	2277	1565.82	874	2258	2.586	1.371	1.56702e-59	1.95603e-58	0.0001	0.0029	0.0026	0.0026	TRUE	NA
MGG_08745	2562	2313	4351	5161	2493	2298	4775	4805	3592.96	2396	4790	1.999	1	2.29264e-59	2.85855e-58	0.001	0.0016	0.0015	0.0015	TRUE	NA
MGG_04393	10051	10121	5397	6476	9782	10055	5923	6030	7947.5	9918	5976	0.603	-0.731	2.87364e-59	3.57893e-58	0.0002	0.001	0.0008	0.0008	TRUE	NA
MGG_04584	4563	4530	2115	2444	4441	4501	2321	2276	3384.54	4471	2298	0.514	-0.96	3.61082e-59	4.49197e-58	0	0.0016	0.0014	0.0014	TRUE	NA
MGG_07518	4343	4283	1979	2292	4227	4255	2172	2134	3196.97	4241	2153	0.508	-0.978	4.53378e-59	5.63382e-58	0	0.0017	0.0014	0.0014	TRUE	NA
MGG_05454	3687	3566	5739	6867	3588	3543	6299	6394	4955.83	3566	6346	1.78	0.832	4.83623e-59	6.0029e-58	0	0.0013	0.001	0.001	TRUE	NA
MGG_16868	287	195	1116	1272	279	194	1225	1184	720.54	236	1204	5.089	2.347	5.58643e-59	6.9263e-58	0.028	0.0058	0.0076	0.0076	TRUE	NA
MGG_10447	42128	40592	25330	28632	41000	40329	27800	26658	33946.7	40664	27229	0.67	-0.579	5.64233e-59	6.98776e-58	0.0004	0.0006	0.0006	0.0006	TRUE	NA
MGG_12275	4777	4503	2142	2384	4649	4474	2351	2220	3423.35	4562	2286	0.501	-0.998	6.16408e-59	7.62538e-58	0.0008	0.0016	0.0015	0.0015	TRUE	NA
MGG_11454	1200	1120	2423	2865	1168	1113	2659	2668	1901.84	1140	2664	2.336	1.224	1.24147e-58	1.53407e-57	0	0.0025	0.0021	0.0021	TRUE	NA
MGG_11445	50	24	6607	7004	49	24	7251	6521	3461.22	36	6886	189.797	7.568	1.72862e-58	2.13364e-57	0.0922	0.0016	0.002	0.0922	TRUE	NA
MGG_02711	12869	12511	7132	8513	12524	12430	7827	7926	10177	12477	7876	0.631	-0.663	2.31929e-58	2.85951e-57	0	0.0009	0.0007	0.0007	TRUE	NA
MGG_04917	2142	1929	3757	4456	2085	1917	4123	4149	3068.32	2001	4136	2.067	1.048	2.47152e-58	3.04379e-57	0.001	0.0017	0.0017	0.0017	TRUE	NA
MGG_06459	453816	450022	558632	661293	441660	447107	613101	615707	529394	444384	614404	1.383	0.467	2.57797e-58	3.17137e-57	0	0.0005	0.0004	0.0004	TRUE	NA
MGG_09330	1125	1214	2482	2978	1095	1206	2724	2773	1949.43	1150	2748	2.389	1.257	3.48011e-58	4.27639e-57	0.0012	0.0025	0.0023	0.0023	TRUE	NA
MGG_05017	359	333	1131	1314	349	331	1241	1223	786.23	340	1232	3.623	1.857	3.5841e-58	4.39929e-57	0	0.0054	0.0046	0.0046	TRUE	NA
MGG_03316	4313	4073	1898	2111	4197	4047	2083	1965	3073.16	4122	2024	0.491	-1.027	5.72908e-58	7.02433e-57	0.0007	0.0017	0.0016	0.0016	TRUE	NA
MGG_02987	2195	1985	704	790	2136	1972	773	736	1404.13	2054	754	0.367	-1.447	7.97324e-58	9.76501e-57	0.0017	0.0032	0.003	0.003	TRUE	NA
MGG_12405	1955	1948	3497	4155	1903	1935	3838	3869	2886.14	1919	3854	2.008	1.006	9.63028e-58	1.17814e-56	0	0.0018	0.0015	0.0015	TRUE	NA
MGG_09720	148	112	777	824	144	111	853	767	468.82	128	810	6.338	2.664	1.02368e-57	1.25095e-56	0.0102	0.0087	0.0088	0.0088	TRUE	NA
MGG_04893	1815	1745	571	607	1766	1734	627	565	1172.98	1750	596	0.34	-1.556	1.11277e-57	1.35832e-56	0.0001	0.0038	0.0034	0.0034	TRUE	NA
MGG_01236	4130	3951	1594	2092	4019	3925	1749	1948	2910.5	3972	1848	0.466	-1.102	1.17031e-57	1.42698e-56	0.0022	0.0018	0.0019	0.0019	TRUE	NA
MGG_09659	14	15	490	507	14	15	538	472	259.59	14	505	35.388	5.145	1.2266e-57	1.49396e-56	0	0.0153	0.0142	0.0142	TRUE	NA
MGG_00548	71394	73196	94221	115140	69482	72722	103408	107203	88203.6	71102	105306	1.481	0.567	2.60873e-57	3.17386e-56	0.0008	0.0005	0.0006	0.0006	TRUE	NA
MGG_07233	931	963	188	202	906	957	206	188	564.31	932	197	0.211	-2.242	2.94777e-57	3.5824e-56	0	0.0073	0.0064	0.0064	TRUE	NA
MGG_16260	533	552	1458	1702	519	548	1600	1585	1063	534	1592	2.985	1.578	5.68713e-57	6.90392e-56	0	0.0041	0.0035	0.0035	TRUE	NA
MGG_06047	4966	4957	7561	8728	4833	4925	8298	8126	6545.61	4879	8212	1.683	0.751	6.89044e-57	8.35552e-56	0	0.0011	0.0009	0.0009	TRUE	NA
MGG_07177	14484	14938	7904	9719	14096	14841	8675	9049	11665.2	14468	8862	0.613	-0.707	6.91854e-57	8.38038e-56	0.0009	0.0008	0.0009	0.0009	TRUE	NA
MGG_05982	2087	2175	678	875	2031	2161	744	815	1437.7	2096	780	0.372	-1.426	1.27265e-56	1.53986e-55	0.0019	0.0032	0.003	0.003	TRUE	NA
MGG_04468	748	774	1798	2118	728	769	1973	1972	1360.56	748	1972	2.636	1.398	1.28611e-56	1.55445e-55	0	0.0033	0.0028	0.0028	TRUE	NA
MGG_17678	9227	9145	4988	5922	8980	9086	5474	5514	7263.43	9033	5494	0.608	-0.717	1.28845e-56	1.55557e-55	0	0.001	0.0008	0.0008	TRUE	NA
MGG_07384	10828	10737	6038	7080	10538	10667	6627	6592	8606.02	10602	6610	0.623	-0.682	1.71095e-56	2.06342e-55	0	0.0009	0.0008	0.0008	TRUE	NA
MGG_06428	13128	13078	7489	8837	12776	12993	8219	8228	10554.2	12884	8224	0.638	-0.648	1.90014e-56	2.28908e-55	0	0.0009	0.0007	0.0007	TRUE	NA
MGG_06333	11351	11220	5912	7404	11047	11147	6488	6894	8894.08	11097	6691	0.603	-0.729	2.01649e-56	2.4266e-55	0.0007	0.0009	0.0009	0.0009	TRUE	NA
MGG_16195	35555	33575	46274	52989	34603	33357	50786	49336	42020.6	33980	50061	1.473	0.559	2.08711e-56	2.50885e-55	0.0005	0.0006	0.0006	0.0006	TRUE	NA
MGG_04612	21167	20518	12322	14802	20600	20385	13523	13782	17072.5	20492	13652	0.666	-0.586	2.31465e-56	2.77934e-55	0	0.0007	0.0006	0.0006	TRUE	NA
MGG_02966	148	91	3646	4026	144	90	4001	3748	1996.1	117	3874	33.044	5.046	2.4638e-56	2.95522e-55	0.0446	0.0024	0.003	0.0446	TRUE	NA
MGG_10103	1046	951	171	243	1018	945	188	226	594.19	982	207	0.212	-2.241	2.61644e-56	3.13491e-55	0.0042	0.0069	0.0067	0.0067	TRUE	NA
MGG_05169	8981	9289	13025	15535	8740	9229	14295	14464	11682.1	8984	14380	1.601	0.679	2.70849e-56	3.24167e-55	0.0006	0.0008	0.0008	0.0008	TRUE	NA
MGG_06524	6933	7415	3468	4120	6747	7367	3806	3836	5439.1	7057	3821	0.542	-0.885	4.27387e-56	5.10968e-55	0.0015	0.0012	0.0013	0.0013	TRUE	NA
MGG_02746	2676	2785	4585	5673	2604	2767	5032	5282	3921.32	2686	5157	1.921	0.942	5.00886e-56	5.98193e-55	0.0012	0.0015	0.0014	0.0014	TRUE	NA
MGG_04206	6056	6120	9020	10428	5894	6080	9899	9709	7895.69	5987	9804	1.637	0.711	1.06283e-55	1.26794e-54	0.0002	0.001	0.0009	0.0009	TRUE	NA
MGG_00310	228	233	922	1015	222	231	1012	945	602.58	226	978	4.315	2.109	1.30963e-55	1.56067e-54	0	0.0069	0.006	0.006	TRUE	NA
MGG_07210	79	74	568	628	77	74	623	585	339.62	76	604	8.028	3.005	1.44784e-55	1.72353e-54	0	0.0118	0.0102	0.0102	TRUE	NA
MGG_09894	7881	8089	4012	4947	7670	8037	4403	4606	6178.91	7854	4504	0.574	-0.801	1.98626e-55	2.36191e-54	0.0007	0.0011	0.0011	0.0011	TRUE	NA
MGG_16965	102	81	591	706	99	80	649	657	371.42	90	653	7.262	2.86	2.03888e-55	2.42188e-54	0	0.0108	0.0097	0.0097	TRUE	NA
MGG_17540	551	496	1388	1747	536	493	1523	1627	1044.73	514	1575	3.062	1.614	2.12682e-55	2.52363e-54	0.0015	0.0042	0.0038	0.0038	TRUE	NA
MGG_01825	2458	2256	4126	4813	2392	2241	4528	4481	3410.77	2316	4504	1.944	0.959	2.33256e-55	2.76478e-54	0.0004	0.0016	0.0015	0.0015	TRUE	NA
MGG_02708	26559	24432	36800	41107	25848	24274	40388	38273	32195.7	25061	39330	1.569	0.65	2.40224e-55	2.84432e-54	0.0016	0.0006	0.0008	0.0008	TRUE	NA
MGG_08455	1072	864	2598	2731	1043	858	2851	2543	1823.94	950	2697	2.835	1.503	2.9054e-55	3.4364e-54	0.0113	0.0026	0.0037	0.0037	TRUE	NA
MGG_13622	1676	1652	522	620	1631	1641	573	577	1105.64	1636	575	0.352	-1.508	3.92194e-55	4.63377e-54	0	0.004	0.0033	0.0033	TRUE	NA
MGG_05307	13974	12771	7299	8186	13600	12688	8011	7622	10480.1	13144	7816	0.595	-0.75	4.61445e-55	5.44614e-54	0.0016	0.0009	0.001	0.001	TRUE	NA
MGG_01210	29467	28600	17806	21203	28678	28415	19542	19741	24094	28546	19642	0.688	-0.539	5.78643e-55	6.82206e-54	0	0.0007	0.0005	0.0005	TRUE	NA
MGG_03122	5504	5870	8781	10934	5357	5832	9637	10180	7751.5	5594	9908	1.772	0.825	6.07156e-55	7.15059e-54	0.0023	0.001	0.0012	0.0012	TRUE	NA
MGG_06915	4029	3866	1668	2118	3921	3841	1831	1972	2891.17	3881	1902	0.49	-1.028	6.10223e-55	7.17906e-54	0.0007	0.0018	0.0017	0.0017	TRUE	NA
MGG_03478	1740	1728	3137	3756	1693	1717	3443	3497	2587.54	1705	3470	2.035	1.025	6.39314e-55	7.5133e-54	0	0.002	0.0016	0.0016	TRUE	NA
MGG_08905	17532	17556	10233	12287	17062	17442	11231	11440	14293.9	17252	11336	0.657	-0.606	7.29067e-55	8.55898e-54	0.0001	0.0008	0.0007	0.0007	TRUE	NA
MGG_09190	4457	4732	2081	2431	4338	4701	2284	2263	3396.57	4520	2274	0.503	-0.991	7.43586e-55	8.72017e-54	0.0015	0.0016	0.0016	0.0016	TRUE	NA
MGG_05281	4445	4323	2007	2454	4326	4295	2203	2285	3277.11	4310	2244	0.521	-0.941	7.4704e-55	8.75138e-54	0	0.0017	0.0014	0.0014	TRUE	NA
MGG_15685	55	50	508	549	54	50	558	511	292.97	52	534	10.348	3.371	8.90326e-55	1.04189e-53	0	0.0136	0.012	0.012	TRUE	NA
MGG_05203	7689	7652	4100	4812	7483	7602	4500	4480	6016.38	7542	4490	0.595	-0.748	1.06392e-54	1.24372e-53	0	0.0011	0.0009	0.0009	TRUE	NA
MGG_02370	19410	19325	10902	13543	18890	19200	11965	12609	15666.1	19045	12287	0.645	-0.632	1.87797e-54	2.19302e-53	0.0006	0.0007	0.0007	0.0007	TRUE	NA
MGG_06721	16157	14850	8721	10051	15724	14754	9571	9358	12351.9	15239	9464	0.621	-0.687	2.13773e-54	2.49371e-53	0.001	0.0008	0.0009	0.0009	TRUE	NA
MGG_14324	2486	2437	954	1125	2419	2421	1047	1047	1733.77	2420	1047	0.433	-1.209	3.03622e-54	3.5381e-53	0	0.0027	0.0022	0.0022	TRUE	NA
MGG_00647	5833	5717	2942	3305	5677	5680	3229	3077	4415.69	5678	3153	0.555	-0.849	3.34732e-54	3.89651e-53	0.0002	0.0014	0.0012	0.0012	TRUE	NA
MGG_06712	34046	33665	20863	25014	33134	33447	22897	23290	28192	33290	23094	0.694	-0.528	4.16353e-54	4.84153e-53	0	0.0006	0.0005	0.0005	TRUE	NA
MGG_15291	4742	4775	7126	8394	4615	4744	7821	7815	6248.81	4680	7818	1.671	0.74	4.61113e-54	5.35638e-53	0	0.0011	0.0009	0.0009	TRUE	NA
MGG_08845	889	849	1897	2294	865	844	2082	2136	1481.63	854	2109	2.469	1.304	4.6332e-54	5.37636e-53	0	0.0031	0.0026	0.0026	TRUE	NA
MGG_10192	10551	10275	5898	6807	10268	10208	6473	6338	8321.91	10238	6406	0.626	-0.677	5.24713e-54	6.08237e-53	0	0.001	0.0008	0.0008	TRUE	NA
MGG_09414	3747	3781	5810	7172	3647	3757	6376	6678	5114.31	3702	6527	1.764	0.819	8.14233e-54	9.42855e-53	0.0006	0.0012	0.0011	0.0011	TRUE	NA
MGG_02952	13714	13143	7763	8744	13347	13058	8520	8141	10766.4	13202	8330	0.631	-0.665	1.35146e-53	1.56331e-52	0.0004	0.0009	0.0008	0.0008	TRUE	NA
MGG_10471	58	48	474	567	56	48	520	528	288.07	52	524	10.061	3.331	1.62681e-53	1.87985e-52	0	0.0138	0.0121	0.0121	TRUE	NA
MGG_04495	7824	7583	4161	4859	7614	7534	4567	4524	6059.76	7574	4546	0.6	-0.737	1.69065e-53	1.95158e-52	0	0.0011	0.0009	0.0009	TRUE	NA
MGG_06692	3512	3442	1538	1830	3418	3420	1688	1704	2557.36	3419	1696	0.496	-1.011	2.88348e-53	3.32503e-52	0	0.002	0.0016	0.0016	TRUE	NA
MGG_11776	9748	9235	5221	6163	9487	9175	5730	5738	7532.57	9331	5734	0.615	-0.702	3.27557e-53	3.77323e-52	0	0.001	0.0009	0.0009	TRUE	NA
MGG_08690	3119	2905	1257	1358	3035	2886	1380	1264	2141.4	2960	1322	0.446	-1.165	4.08115e-53	4.69629e-52	0.0018	0.0023	0.0022	0.0022	TRUE	NA
MGG_08535	273380	284048	166619	203454	266057	282208	182865	189429	230140	274132	186147	0.679	-0.558	5.48739e-53	6.30793e-52	0.0012	0.0005	0.0006	0.0006	TRUE	NA
MGG_11871	11611	11466	6462	7839	11300	11392	7092	7299	9270.6	11346	7196	0.634	-0.657	6.93917e-53	7.9685e-52	0	0.0009	0.0008	0.0008	TRUE	NA
MGG_10869	6	3	804	946	6	3	882	881	443	4	882	199.265	7.639	8.72733e-53	1.00115e-51	0	0.0091	0.0082	0.0082	TRUE	NA
MGG_15140	3067	3053	4896	5730	2985	3033	5373	5335	4181.61	3009	5354	1.779	0.831	9.47555e-53	1.08586e-51	0	0.0014	0.0012	0.0012	TRUE	NA
MGG_00726	7150	7079	9964	12215	6958	7033	10936	11373	9075.03	6996	11154	1.595	0.673	1.0109e-52	1.15724e-51	0.0003	0.0009	0.0008	0.0008	TRUE	NA
MGG_02525	2894	2856	1216	1378	2816	2837	1335	1283	2067.89	2826	1309	0.463	-1.112	1.06581e-52	1.21884e-51	0	0.0023	0.002	0.002	TRUE	NA
MGG_10370	15585	15546	8966	10893	15168	15445	9840	10142	12648.8	15306	9991	0.653	-0.615	1.30704e-52	1.49316e-51	0.0001	0.0008	0.0007	0.0007	TRUE	NA
MGG_01355	445	392	1312	1401	433	389	1440	1304	891.72	411	1372	3.334	1.737	1.46679e-52	1.67393e-51	0.0038	0.0048	0.0047	0.0047	TRUE	NA
MGG_02540	6881	6088	3124	3538	6697	6049	3429	3294	4866.99	6373	3362	0.527	-0.923	1.47245e-52	1.67866e-51	0.0025	0.0013	0.0015	0.0015	TRUE	NA
MGG_06023	318	330	1019	1231	309	328	1118	1146	725.46	318	1132	3.554	1.829	1.47635e-52	1.68137e-51	0	0.0058	0.0049	0.0049	TRUE	NA
MGG_02809	2542	2514	4137	5006	2474	2498	4540	4661	3543.23	2486	4600	1.851	0.888	1.6078e-52	1.82918e-51	0	0.0016	0.0013	0.0013	TRUE	NA
MGG_02383	7	5	580	712	7	5	637	663	327.81	6	650	110.166	6.784	1.62626e-52	1.84828e-51	0	0.0122	0.0109	0.0109	TRUE	NA
MGG_07756	6692	6382	3399	4030	6513	6341	3730	3752	5084	6427	3741	0.582	-0.78	2.24085e-52	2.54416e-51	0	0.0013	0.001	0.001	TRUE	NA
MGG_00758	4492	4441	6612	8064	4372	4412	7257	7508	5887.18	4392	7382	1.681	0.749	3.15791e-52	3.58166e-51	0	0.0011	0.001	0.001	TRUE	NA
MGG_07632	164	156	699	856	160	155	767	797	469.69	158	782	4.973	2.314	3.17278e-52	3.59484e-51	0	0.0087	0.0074	0.0074	TRUE	NA
MGG_09225	627	628	1500	1853	610	624	1646	1725	1151.41	617	1686	2.733	1.45	3.21167e-52	3.63517e-51	0	0.0038	0.0033	0.0033	TRUE	NA
MGG_05090	188	165	744	896	183	164	817	834	499.42	174	826	4.758	2.25	4.0986e-52	4.63431e-51	0	0.0082	0.0071	0.0071	TRUE	NA
MGG_05948	6604	6442	3450	4015	6427	6400	3786	3738	5088	6414	3762	0.587	-0.77	4.20163e-52	4.74596e-51	0	0.0012	0.001	0.001	TRUE	NA
MGG_01978	6943	6656	3551	3875	6757	6613	3897	3608	5218.75	6685	3752	0.561	-0.834	4.21107e-52	4.75175e-51	0.0012	0.0012	0.0012	0.0012	TRUE	NA
MGG_03680	20006	19502	11776	14219	19470	19376	12924	13239	16252.2	19423	13082	0.674	-0.57	4.41558e-52	4.97744e-51	0	0.0007	0.0006	0.0006	TRUE	NA
MGG_07156	1141	1138	2282	2685	1110	1131	2505	2500	1811.37	1120	2502	2.233	1.159	5.09775e-52	5.74056e-51	0	0.0026	0.0022	0.0022	TRUE	NA
MGG_07843	3163	2855	1233	1434	3078	2837	1353	1335	2150.79	2958	1344	0.454	-1.138	5.64325e-52	6.34837e-51	0.0015	0.0023	0.0022	0.0022	TRUE	NA
MGG_02813	1064	1124	229	314	1035	1117	251	292	673.98	1076	272	0.253	-1.981	5.85042e-52	6.57473e-51	0.0035	0.0062	0.0059	0.0059	TRUE	NA
MGG_03731	2431	2409	3985	4807	2366	2393	4374	4476	3402.12	2380	4425	1.86	0.895	6.75838e-52	7.58738e-51	0	0.0016	0.0014	0.0014	TRUE	NA
MGG_06044	24350	25287	14086	17283	23698	25123	15459	16092	20093	24410	15776	0.646	-0.63	7.79045e-52	8.73717e-51	0.0011	0.0007	0.0008	0.0008	TRUE	NA
MGG_10575	82706	80158	99889	118735	80491	79639	109629	110550	95077	80065	110090	1.375	0.459	8.16181e-52	9.14437e-51	0	0.0005	0.0004	0.0004	TRUE	NA
MGG_17538	1954	2008	693	836	1902	1995	761	778	1358.9	1948	770	0.395	-1.34	9.2992e-52	1.04081e-50	0	0.0033	0.0029	0.0029	TRUE	NA
MGG_15038	3235	3118	1360	1419	3148	3098	1493	1321	2264.98	3123	1407	0.45	-1.152	1.12695e-51	1.26006e-50	0.0027	0.0022	0.0023	0.0023	TRUE	NA
MGG_05296	7075	6870	3700	4408	6885	6825	4061	4104	5468.97	6855	4082	0.596	-0.748	1.26312e-51	1.41089e-50	0	0.0012	0.001	0.001	TRUE	NA
MGG_00968	18997	17477	10544	12090	18488	17364	11572	11257	14670.1	17926	11414	0.637	-0.651	1.41443e-51	1.5783e-50	0.001	0.0008	0.0008	0.0008	TRUE	NA
MGG_07146	418	477	1255	1588	407	474	1377	1479	934.15	440	1428	3.245	1.698	1.63997e-51	1.82812e-50	0.0047	0.0046	0.0046	0.0046	TRUE	NA
MGG_01507	1856	1807	613	760	1806	1795	673	708	1245.49	1800	690	0.384	-1.383	1.873e-51	2.08579e-50	0	0.0036	0.003	0.003	TRUE	NA
MGG_17861	4209	4298	6514	7551	4096	4270	7149	7030	5636.51	4183	7090	1.695	0.761	1.97735e-51	2.19978e-50	0.0002	0.0012	0.001	0.001	TRUE	NA
MGG_05710	1070	1050	2190	2515	1041	1043	2404	2342	1707.42	1042	2373	2.276	1.186	2.08869e-51	2.3213e-50	0	0.0027	0.0023	0.0023	TRUE	NA
MGG_01548	68	78	523	598	66	77	574	557	318.61	72	566	7.873	2.977	2.17021e-51	2.40948e-50	0	0.0125	0.011	0.011	TRUE	NA
MGG_09413	345	348	1101	1218	336	346	1208	1134	755.97	341	1171	3.436	1.781	2.28118e-51	2.53014e-50	0	0.0056	0.0048	0.0048	TRUE	NA
MGG_06396	7039	6908	3750	4373	6850	6863	4116	4072	5475.22	6856	4094	0.597	-0.744	2.36561e-51	2.62115e-50	0	0.0012	0.001	0.001	TRUE	NA
MGG_03135	14683	15218	8248	10117	14290	15119	9052	9420	11970.2	14704	9236	0.628	-0.671	4.31025e-51	4.77108e-50	0.001	0.0008	0.0009	0.0009	TRUE	NA
MGG_08047	195	200	857	891	190	199	941	830	539.66	194	886	4.554	2.187	5.02736e-51	5.55928e-50	0	0.0076	0.0071	0.0071	TRUE	NA
MGG_11188	374	412	1181	1345	364	409	1296	1252	830.44	386	1274	3.296	1.72	5.1582e-51	5.69827e-50	0.0004	0.0051	0.0046	0.0046	TRUE	NA
MGG_01326	2402	2558	949	1122	2338	2541	1042	1045	1741.32	2440	1044	0.428	-1.226	6.37359e-51	7.03387e-50	0.0016	0.0027	0.0025	0.0025	TRUE	NA
MGG_15133	977	925	210	249	951	919	230	232	583.04	935	231	0.247	-2.016	7.4339e-51	8.19584e-50	0	0.0071	0.006	0.006	TRUE	NA
MGG_13617	310	317	982	1185	302	315	1078	1103	699.43	308	1090	3.538	1.823	8.60311e-51	9.47543e-50	0	0.006	0.005	0.005	TRUE	NA
MGG_05989	674	621	1528	1869	656	617	1677	1740	1172.52	636	1708	2.685	1.425	9.41316e-51	1.03573e-49	0	0.0038	0.0033	0.0033	TRUE	NA
MGG_08834	15606	15293	9201	10945	15188	15194	10098	10191	12667.6	15191	10144	0.668	-0.582	9.75355e-51	1.07211e-49	0	0.0008	0.0006	0.0006	TRUE	NA
MGG_09840	1875	1627	3527	3862	1825	1616	3871	3596	2726.98	1720	3734	2.169	1.117	1.0147e-50	1.11425e-49	0.0042	0.0019	0.0022	0.0022	TRUE	NA
MGG_01609	119140	114116	75601	89559	115949	113377	82972	83385	98920.8	114663	83178	0.725	-0.463	1.29025e-50	1.41543e-49	0.0001	0.0005	0.0004	0.0004	TRUE	NA
MGG_16038	195	168	761	878	190	167	835	817	502.34	178	826	4.631	2.211	1.5353e-50	1.68258e-49	0	0.0081	0.0071	0.0071	TRUE	NA
MGG_02041	754	747	1662	2122	734	742	1824	1976	1318.93	738	1900	2.576	1.365	1.97721e-50	2.16474e-49	0	0.0034	0.0031	0.0031	TRUE	NA
MGG_09015	72762	68640	44239	49468	70813	68195	48552	46058	58404.7	69504	47305	0.681	-0.555	2.04674e-50	2.23865e-49	0.001	0.0006	0.0006	0.0006	TRUE	NA
MGG_02624	20217	20768	11970	14456	19675	20633	13137	13459	16726.4	20154	13298	0.66	-0.6	2.89015e-50	3.15801e-49	0.0006	0.0007	0.0007	0.0007	TRUE	NA
MGG_10269	1083	1016	2119	2544	1054	1009	2326	2369	1689.41	1032	2348	2.275	1.186	2.99763e-50	3.27221e-49	0	0.0028	0.0023	0.0023	TRUE	NA
MGG_03699	5567	5358	2788	3300	5418	5323	3060	3073	4218.38	5370	3066	0.571	-0.809	3.56221e-50	3.88467e-49	0	0.0014	0.0012	0.0012	TRUE	NA
MGG_15774	23413	22863	14369	16918	22786	22715	15770	15752	19255.6	22750	15761	0.693	-0.53	4.06373e-50	4.42722e-49	0	0.0007	0.0006	0.0006	TRUE	NA
MGG_01671	6966	6836	9805	11263	6779	6792	10761	10487	8704.68	6786	10624	1.565	0.647	4.25035e-50	4.62597e-49	0	0.0009	0.0008	0.0008	TRUE	NA
MGG_00244	154	144	719	768	150	143	789	715	449.28	146	752	5.131	2.359	4.25647e-50	4.62807e-49	0	0.009	0.008	0.008	TRUE	NA
MGG_02372	312	271	939	1276	304	269	1031	1188	697.87	286	1110	3.875	1.954	7.12446e-50	7.73884e-49	0.0072	0.006	0.0061	0.0061	TRUE	NA
MGG_08059	2149	2185	3745	4280	2091	2171	4110	3985	3089.35	2131	4048	1.899	0.925	7.28743e-50	7.90808e-49	0	0.0017	0.0015	0.0015	TRUE	NA
MGG_06250	16248	15951	20702	24844	15813	15848	22721	23131	19378.1	15830	22926	1.448	0.534	7.83653e-50	8.4956e-49	0	0.0007	0.0006	0.0006	TRUE	NA
MGG_04478	7852	7654	10740	12482	7642	7604	11787	11622	9663.71	7623	11704	1.535	0.619	1.10363e-49	1.19528e-48	0	0.0009	0.0007	0.0007	TRUE	NA
MGG_16204	14589	13811	8350	9430	14198	13722	9164	8780	11466	13960	8972	0.643	-0.638	1.24789e-49	1.35019e-48	0.0006	0.0008	0.0008	0.0008	TRUE	NA
MGG_00342	1678	1571	2943	3449	1633	1561	3230	3211	2408.77	1597	3220	2.017	1.012	1.4968e-49	1.61792e-48	0	0.0021	0.0018	0.0018	TRUE	NA
MGG_08807	1116	1131	2195	2704	1086	1124	2409	2518	1784.1	1105	2464	2.23	1.157	2.02658e-49	2.18843e-48	0	0.0026	0.0023	0.0023	TRUE	NA
MGG_07147	1773	1557	3160	3639	1726	1547	3468	3388	2532.17	1636	3428	2.095	1.067	2.15165e-49	2.32122e-48	0.0022	0.002	0.0021	0.0021	TRUE	NA
MGG_07661	565	560	1438	1607	550	556	1578	1496	1045.17	553	1537	2.778	1.474	2.62377e-49	2.82778e-48	0	0.0042	0.0036	0.0036	TRUE	NA
MGG_00546	7887	8066	4317	5127	7676	8014	4738	4774	6300.24	7845	4756	0.606	-0.722	3.00058e-49	3.23074e-48	0.0004	0.0011	0.001	0.001	TRUE	NA
MGG_14270	12485	12115	16197	19017	12151	12037	17776	17706	14917.4	12094	17741	1.467	0.553	3.81613e-49	4.10485e-48	0	0.0008	0.0006	0.0006	TRUE	NA
MGG_00785	6513	6267	3175	3995	6339	6226	3485	3720	4942.28	6282	3602	0.574	-0.802	4.25152e-49	4.56873e-48	0.0007	0.0013	0.0012	0.0012	TRUE	NA
MGG_01114	45335	45304	28965	34263	44121	45011	31789	31901	38205.4	44566	31845	0.715	-0.485	4.42224e-49	4.74756e-48	0	0.0006	0.0005	0.0005	TRUE	NA
MGG_05247	13945	13524	8223	9526	13571	13436	9025	8869	11225.5	13504	8947	0.662	-0.594	5.88859e-49	6.31565e-48	0	0.0008	0.0007	0.0007	TRUE	NA
MGG_12131	1448	1398	2593	3208	1409	1389	2846	2987	2157.71	1399	2916	2.085	1.06	6.37379e-49	6.82942e-48	0	0.0023	0.002	0.002	TRUE	NA
MGG_02710	6777	6765	3654	4279	6595	6721	4010	3984	5327.74	6658	3997	0.6	-0.736	6.7413e-49	7.21619e-48	0	0.0012	0.001	0.001	TRUE	NA
MGG_07761	456	474	1226	1465	444	471	1346	1364	906.07	458	1355	2.963	1.567	7.85322e-49	8.3983e-48	0	0.0047	0.004	0.004	TRUE	NA
MGG_13783	3050	2931	1322	1513	2968	2912	1451	1409	2184.98	2940	1430	0.486	-1.041	8.53179e-49	9.11516e-48	0	0.0023	0.0019	0.0019	TRUE	NA
MGG_07229	4237	4209	6351	7312	4124	4182	6970	6808	5520.86	4153	6889	1.659	0.73	1.0755e-48	1.14792e-47	0	0.0012	0.001	0.001	TRUE	NA
MGG_03244	14631	14232	8700	10018	14239	14140	9548	9327	11813.6	14190	9438	0.665	-0.588	1.08356e-48	1.15541e-47	0	0.0008	0.0007	0.0007	TRUE	NA
MGG_08011	1663	1609	521	662	1618	1599	572	616	1101.3	1608	594	0.37	-1.436	1.12384e-48	1.19721e-47	0	0.004	0.0034	0.0034	TRUE	NA
MGG_03763	729	660	106	138	709	656	116	128	402.5	682	122	0.18	-2.477	1.16277e-48	1.23749e-47	0	0.01	0.0089	0.0089	TRUE	NA
MGG_07969	2246	2204	881	1019	2186	2190	967	949	1572.8	2188	958	0.438	-1.192	1.4658e-48	1.55849e-47	0	0.0029	0.0024	0.0024	TRUE	NA
MGG_06614	1419	1320	2593	3007	1381	1311	2846	2800	2084.49	1346	2823	2.096	1.068	1.77656e-48	1.88708e-47	0	0.0023	0.002	0.002	TRUE	NA
MGG_11205	9379	9125	5219	6238	9128	9066	5728	5808	7432.38	9097	5768	0.634	-0.657	1.85324e-48	1.96664e-47	0	0.001	0.0008	0.0008	TRUE	NA
MGG_16126	1364	1445	2627	3177	1327	1436	2883	2958	2151.06	1382	2920	2.115	1.08	2.07766e-48	2.20268e-47	0.0009	0.0023	0.0021	0.0021	TRUE	NA
MGG_05937	1413	1316	416	476	1375	1307	457	443	895.59	1341	450	0.335	-1.577	2.09449e-48	2.2184e-47	0	0.0048	0.0041	0.0041	TRUE	NA
MGG_15154	8414	8068	11180	13319	8189	8016	12270	12401	10218.8	8102	12336	1.523	0.606	2.37957e-48	2.51792e-47	0	0.0009	0.0007	0.0007	TRUE	NA
MGG_03279	121	119	639	679	118	118	701	632	392.37	118	666	5.647	2.498	2.4424e-48	2.58193e-47	0	0.0103	0.0091	0.0091	TRUE	NA
MGG_04104	14128	14444	8389	9877	13750	14350	9207	9196	11625.8	14050	9202	0.655	-0.611	2.91934e-48	3.08317e-47	0.0004	0.0008	0.0008	0.0008	TRUE	NA
MGG_08474	5644	5514	2856	3457	5493	5478	3134	3219	4331.07	5486	3176	0.579	-0.788	3.06606e-48	3.23503e-47	0	0.0014	0.0012	0.0012	TRUE	NA
MGG_12614	7412	7421	10236	12010	7213	7373	11234	11182	9250.63	7293	11208	1.537	0.62	3.315e-48	3.49435e-47	0	0.0009	0.0008	0.0008	TRUE	NA
MGG_08809	7123	6615	9884	11413	6932	6572	10848	10626	8744.58	6752	10737	1.59	0.669	3.32468e-48	3.50121e-47	0.0006	0.0009	0.0009	0.0009	TRUE	NA
MGG_16300	223	219	783	965	217	218	859	898	548.11	218	878	4.046	2.016	3.6477e-48	3.83772e-47	0	0.0075	0.0063	0.0063	TRUE	NA
MGG_06642	9516	9207	12593	14746	9261	9147	13821	13729	11489.7	9204	13775	1.497	0.582	4.06908e-48	4.27699e-47	0	0.0008	0.0007	0.0007	TRUE	NA
MGG_05045	30	37	412	446	29	37	452	415	233.35	33	434	13.156	3.718	5.18903e-48	5.44897e-47	0	0.0169	0.0152	0.0152	TRUE	NA
MGG_01712	8575	7910	4473	5005	8345	7859	4909	4660	6443.3	8102	4784	0.59	-0.76	5.41814e-48	5.68416e-47	0.0012	0.0011	0.0011	0.0011	TRUE	NA
MGG_15294	1324	1212	371	393	1289	1204	407	366	816.44	1246	386	0.31	-1.691	5.4303e-48	5.69151e-47	0.0019	0.0052	0.0048	0.0048	TRUE	NA
MGG_14746	5082	5025	7208	8645	4946	4992	7911	8049	6474.55	4969	7980	1.606	0.684	6.19771e-48	6.48967e-47	0	0.0011	0.0009	0.0009	TRUE	NA
MGG_09459	1450	1356	2630	3042	1411	1347	2886	2832	2119.28	1379	2859	2.073	1.052	6.21375e-48	6.50031e-47	0	0.0023	0.002	0.002	TRUE	NA
MGG_09804	29	51	424	529	28	51	465	493	259.19	40	479	12.167	3.605	7.05184e-48	7.37007e-47	0.042	0.0153	0.016	0.016	TRUE	NA
MGG_04897	2353	2262	920	1094	2290	2247	1010	1019	1641.4	2268	1014	0.447	-1.161	7.10298e-48	7.41651e-47	0	0.0028	0.0024	0.0024	TRUE	NA
MGG_13485	5634	5857	2904	3475	5483	5819	3187	3235	4431.19	5651	3211	0.568	-0.815	1.0131e-47	1.05682e-46	0.0008	0.0014	0.0013	0.0013	TRUE	NA
MGG_06695	2737	2689	1077	1378	2664	2672	1182	1283	1950.07	2668	1232	0.462	-1.113	1.08968e-47	1.13564e-46	0.0005	0.0025	0.0022	0.0022	TRUE	NA
MGG_14791	76	80	566	559	74	79	621	520	323.77	76	570	7.435	2.894	1.37269e-47	1.42923e-46	0	0.0123	0.0119	0.0119	TRUE	NA
MGG_08649	5698	5719	2993	3306	5545	5682	3285	3078	4397.56	5614	3182	0.566	-0.82	1.47133e-47	1.53048e-46	0.0007	0.0014	0.0013	0.0013	TRUE	NA
MGG_07595	86	69	542	569	84	69	595	530	319.22	76	562	7.378	2.883	1.64871e-47	1.71338e-46	0	0.0125	0.0117	0.0117	TRUE	NA
MGG_15669	206	219	832	896	200	218	913	834	541.36	209	874	4.178	2.063	1.65432e-47	1.7176e-46	0	0.0076	0.0068	0.0068	TRUE	NA
MGG_03066	340	337	996	1186	331	335	1093	1104	715.77	333	1098	3.301	1.723	2.01929e-47	2.09456e-46	0	0.0058	0.0049	0.0049	TRUE	NA
MGG_01163	33	17	380	456	32	17	417	425	222.66	24	421	17.137	4.099	2.10008e-47	2.17632e-46	0	0.0177	0.0174	0.0174	TRUE	NA
MGG_09071	1276	1226	373	382	1242	1218	409	356	806.23	1230	382	0.31	-1.688	3.65332e-47	3.7824e-46	0.0007	0.0052	0.0049	0.0049	TRUE	NA
MGG_02274	10	17	433	397	10	17	475	370	217.87	14	422	31.769	4.99	3.73955e-47	3.86805e-46	0.033	0.0181	0.0193	0.0193	TRUE	NA
MGG_05879	298	235	914	1104	290	233	1003	1028	638.63	262	1016	3.879	1.956	5.00968e-47	5.17698e-46	0.007	0.0065	0.0065	0.0065	TRUE	NA
MGG_10847	7869	7003	11542	12847	7658	6958	12667	11961	9811.16	7308	12314	1.685	0.753	5.60546e-47	5.78724e-46	0.0029	0.0009	0.0012	0.0012	TRUE	NA
MGG_08497	971	909	217	265	945	903	238	247	583.25	924	242	0.263	-1.93	5.84189e-47	6.02571e-46	0	0.0071	0.006	0.006	TRUE	NA
MGG_04839	3727	3453	1650	1955	3627	3431	1811	1820	2672.23	3529	1816	0.514	-0.959	6.21003e-47	6.39946e-46	0	0.0019	0.0017	0.0017	TRUE	NA
MGG_09551	1784	1563	3079	3634	1736	1553	3379	3383	2512.95	1644	3381	2.056	1.04	6.64116e-47	6.83736e-46	0.0022	0.002	0.0021	0.0021	TRUE	NA
MGG_01084	280824	277362	187611	219614	273302	275565	205904	204475	239811	274434	205190	0.748	-0.42	1.32198e-46	1.35977e-45	0	0.0005	0.0004	0.0004	TRUE	NA
MGG_07153	395	373	1096	1242	384	371	1203	1156	778.56	378	1180	3.124	1.643	1.87102e-46	1.92272e-45	0	0.0054	0.0046	0.0046	TRUE	NA
MGG_04371	1247	1304	2437	2831	1214	1296	2675	2636	1954.9	1255	2656	2.116	1.082	1.98669e-46	2.03968e-45	0	0.0025	0.0022	0.0022	TRUE	NA
MGG_09830	813	850	1789	2075	791	844	1963	1932	1382.78	818	1948	2.381	1.252	2.98973e-46	3.06662e-45	0	0.0033	0.0028	0.0028	TRUE	NA
MGG_17476	1057	993	2046	2395	1029	987	2245	2230	1622.66	1008	2238	2.221	1.151	3.28441e-46	3.36576e-45	0	0.0029	0.0024	0.0024	TRUE	NA
MGG_05646	4152	4322	1998	2431	4041	4294	2193	2263	3197.75	4168	2228	0.535	-0.903	3.41337e-46	3.49467e-45	0.001	0.0017	0.0016	0.0016	TRUE	NA
MGG_12868	3010	2958	1350	1559	2929	2939	1482	1452	2200.34	2934	1467	0.5	-1.001	3.66047e-46	3.74419e-45	0	0.0022	0.0019	0.0019	TRUE	NA
MGG_00871	850	841	1743	2167	827	836	1913	2018	1398.34	832	1966	2.365	1.242	3.97576e-46	4.06293e-45	0	0.0032	0.0028	0.0028	TRUE	NA
MGG_07654	2440	2125	4191	4626	2375	2111	4600	4307	3348.16	2243	4454	1.985	0.989	4.13832e-46	4.22514e-45	0.0039	0.0016	0.002	0.002	TRUE	NA
MGG_05956	3065	3018	1342	1636	2983	2998	1473	1523	2244.36	2990	1498	0.501	-0.997	4.17563e-46	4.2593e-45	0	0.0022	0.0018	0.0018	TRUE	NA
MGG_03937	1233	1151	2262	2704	1200	1144	2483	2518	1835.92	1172	2500	2.134	1.093	4.57978e-46	4.66723e-45	0	0.0026	0.0022	0.0022	TRUE	NA
MGG_09640	52361	49477	32656	37313	50958	49156	35840	34741	42674	50057	35290	0.705	-0.504	4.87403e-46	4.96252e-45	0.0005	0.0006	0.0006	0.0006	TRUE	NA
MGG_02105	9577	9443	12719	14769	9320	9382	13959	13751	11603.1	9351	13855	1.482	0.567	8.1183e-46	8.25809e-45	0	0.0008	0.0007	0.0007	TRUE	NA
MGG_00141	4452	4322	6307	7668	4333	4294	6922	7139	5672.03	4314	7030	1.63	0.705	8.17881e-46	8.31199e-45	0	0.0012	0.001	0.001	TRUE	NA
MGG_06321	4484	4518	2258	2670	4364	4489	2478	2486	3454.18	4426	2482	0.561	-0.834	1.09074e-45	1.10748e-44	0	0.0016	0.0013	0.0013	TRUE	NA
MGG_09445	813	870	1802	2113	791	864	1978	1967	1400.16	828	1972	2.383	1.253	1.14879e-45	1.16536e-44	0.0002	0.0032	0.0029	0.0029	TRUE	NA
MGG_16084	7	4	504	558	7	4	553	520	270.87	6	536	99.162	6.632	1.28282e-45	1.30012e-44	0	0.0146	0.0133	0.0133	TRUE	NA
MGG_10235	16	18	404	375	16	18	443	349	206.5	17	396	23.675	4.565	1.38175e-45	1.3991e-44	0	0.0191	0.0192	0.0192	TRUE	NA
MGG_01066	15107	15689	8262	10519	14702	15587	9068	9794	12287.8	15144	9431	0.623	-0.683	2.02541e-45	2.04897e-44	0.0022	0.0008	0.001	0.001	TRUE	NA
MGG_11490	1586	1361	3044	3278	1544	1352	3341	3052	2322.13	1448	3196	2.207	1.142	2.28509e-45	2.30955e-44	0.0054	0.0021	0.0026	0.0026	TRUE	NA
MGG_14232	3238	3162	1494	1709	3151	3142	1640	1591	2380.91	3146	1616	0.513	-0.962	2.42252e-45	2.44621e-44	0	0.0021	0.0018	0.0018	TRUE	NA
MGG_08710	4286	4229	2151	2448	4171	4202	2361	2279	3253.19	4186	2320	0.554	-0.852	2.86927e-45	2.89468e-44	0	0.0017	0.0014	0.0014	TRUE	NA
MGG_06782	1754	1738	621	607	1707	1727	682	565	1170.12	1717	624	0.362	-1.465	3.10464e-45	3.12928e-44	0.0066	0.0038	0.0041	0.0041	TRUE	NA
MGG_05483	71	43	445	572	69	43	488	533	283.19	56	510	9.122	3.189	3.96361e-45	3.99143e-44	0.0312	0.014	0.0148	0.0148	TRUE	NA
MGG_04155	4640	4294	2223	2463	4516	4266	2440	2293	3378.71	4391	2366	0.539	-0.893	4.20232e-45	4.22796e-44	0.0014	0.0016	0.0016	0.0016	TRUE	NA
MGG_04943	4279	4367	6280	7739	4164	4339	6892	7206	5650.23	4252	7049	1.658	0.73	5.63097e-45	5.66017e-44	0.0007	0.0012	0.0011	0.0011	TRUE	NA
MGG_02081	17	16	356	382	17	16	391	356	194.7	16	374	22.992	4.523	5.82271e-45	5.84758e-44	0	0.0202	0.018	0.018	TRUE	NA
MGG_00126	468	457	1208	1369	455	454	1326	1275	877.48	454	1300	2.858	1.515	5.84801e-45	5.86766e-44	0	0.0049	0.0041	0.0041	TRUE	NA
MGG_04455	16602	16081	10040	11917	16157	15977	11019	11096	13562.1	16067	11058	0.688	-0.539	9.12218e-45	9.14453e-44	0	0.0008	0.0006	0.0006	TRUE	NA
MGG_12521	166479	155727	208401	235317	162020	154718	228721	219096	191139	158369	223908	1.414	0.5	1.0176e-44	1.01916e-43	0.001	0.0005	0.0006	0.0006	TRUE	NA
MGG_01370	2298	2170	907	1071	2236	2156	995	997	1596.25	2196	996	0.454	-1.14	1.13456e-44	1.13528e-43	0	0.0029	0.0024	0.0024	TRUE	NA
MGG_00907	7471	7889	11088	14445	7271	7838	12169	13449	10181.8	7554	12809	1.696	0.762	1.35995e-44	1.35958e-43	0.0037	0.0009	0.0013	0.0013	TRUE	NA
MGG_06587	2254	2301	3666	4441	2194	2286	4023	4135	3159.51	2240	4079	1.822	0.865	1.40653e-44	1.40488e-43	0	0.0017	0.0015	0.0015	TRUE	NA
MGG_16374	40199	37443	24243	27121	39122	37200	26607	25251	32045.2	38161	25929	0.679	-0.558	2.05693e-44	2.05266e-43	0.0013	0.0006	0.0007	0.0007	TRUE	NA
MGG_05811	10055	9763	5831	6577	9786	9700	6400	6124	8002.14	9743	6262	0.643	-0.638	2.17627e-44	2.16979e-43	0.0002	0.001	0.0009	0.0009	TRUE	NA
MGG_04429	528	509	1277	1470	514	506	1402	1369	947.43	510	1386	2.717	1.442	2.74571e-44	2.73506e-43	0	0.0045	0.0038	0.0038	TRUE	NA
MGG_11541	5400	4980	2624	3150	5255	4948	2880	2933	4003.95	5102	2906	0.57	-0.812	2.95363e-44	2.93953e-43	0.0008	0.0015	0.0014	0.0014	TRUE	NA
MGG_01743	2630	2497	1113	1197	2560	2481	1222	1114	1844.1	2520	1168	0.463	-1.111	3.00135e-44	2.98433e-43	0.0013	0.0026	0.0024	0.0024	TRUE	NA
MGG_00256	10685	10292	6218	7237	10399	10225	6824	6738	8546.63	10312	6781	0.658	-0.605	3.55071e-44	3.5274e-43	0	0.0009	0.0008	0.0008	TRUE	NA
MGG_00543	2437	2428	1048	1186	2372	2412	1150	1104	1759.6	2392	1127	0.471	-1.086	4.00276e-44	3.97291e-43	0	0.0027	0.0023	0.0023	TRUE	NA
MGG_01470	3850	3808	1837	1907	3747	3783	2016	1776	2830.46	3765	1896	0.503	-0.991	7.129e-44	7.06949e-43	0.0033	0.0019	0.002	0.002	TRUE	NA
MGG_02716	4798	5069	2490	2858	4669	5036	2733	2661	3774.85	4852	2697	0.556	-0.848	7.82689e-44	7.75459e-43	0.0014	0.0015	0.0015	0.0015	TRUE	NA
MGG_07224	2085	2054	839	962	2029	2041	921	896	1471.58	2035	908	0.446	-1.164	8.36771e-44	8.28298e-43	0	0.0031	0.0026	0.0026	TRUE	NA
MGG_06145	548	598	1411	1590	533	594	1549	1480	1039.1	564	1514	2.686	1.426	8.69848e-44	8.6027e-43	0.0015	0.0042	0.0039	0.0039	TRUE	NA
MGG_00651	180	130	679	810	175	129	745	754	450.93	152	750	4.924	2.3	8.81411e-44	8.70926e-43	0.0131	0.009	0.0093	0.0093	TRUE	NA
MGG_10931	12314	11925	7337	8514	11984	11848	8052	7927	9952.84	11916	7990	0.67	-0.577	9.27602e-44	9.15748e-43	0	0.0009	0.0007	0.0007	TRUE	NA
MGG_00464	1320	1185	382	429	1285	1177	419	399	820.16	1231	409	0.332	-1.59	9.45835e-44	9.32914e-43	0	0.0052	0.0047	0.0047	TRUE	NA
MGG_03761	3967	3777	1899	2246	3861	3753	2084	2091	2947.15	3807	2088	0.548	-0.867	1.07053e-43	1.05496e-42	0	0.0018	0.0015	0.0015	TRUE	NA
MGG_03537	5271	5062	2751	3140	5130	5029	3019	2924	4025.45	5080	2972	0.585	-0.774	1.49179e-43	1.46878e-42	0	0.0014	0.0012	0.0012	TRUE	NA
MGG_08489	54	40	421	455	53	40	462	424	244.49	46	443	9.584	3.261	1.56053e-43	1.5351e-42	0	0.0162	0.0149	0.0149	TRUE	NA
MGG_02620	8806	8770	4977	6035	8570	8713	5462	5619	7091.14	8642	5540	0.641	-0.641	1.65975e-43	1.63125e-42	0	0.001	0.0009	0.0009	TRUE	NA
MGG_12474	330	340	1062	1104	321	338	1166	1028	713.1	330	1097	3.327	1.734	1.69474e-43	1.66416e-42	0.0041	0.0059	0.0056	0.0056	TRUE	NA
MGG_18035	86	104	518	609	84	103	569	567	330.64	94	568	6.075	2.603	1.7631e-43	1.72975e-42	0	0.0121	0.0109	0.0109	TRUE	NA
MGG_01159	50487	51357	63018	77587	49135	51024	69162	72239	60390	50080	70700	1.412	0.498	2.29308e-43	2.2477e-42	0.0008	0.0006	0.0006	0.0006	TRUE	NA
MGG_09400	643	638	1406	1775	626	634	1543	1653	1113.84	630	1598	2.538	1.344	2.55165e-43	2.49894e-42	0	0.0039	0.0035	0.0035	TRUE	NA
MGG_06644	5007	5165	2584	3126	4873	5132	2836	2911	3937.72	5002	2874	0.575	-0.8	2.61256e-43	2.55633e-42	0.0007	0.0015	0.0013	0.0013	TRUE	NA
MGG_01244	2380	2480	3880	4661	2316	2464	4258	4340	3344.55	2390	4299	1.799	0.847	3.14895e-43	3.07845e-42	0.0006	0.0016	0.0015	0.0015	TRUE	NA
MGG_06058	557	545	1284	1546	542	541	1409	1439	983.04	542	1424	2.629	1.395	3.42874e-43	3.34901e-42	0	0.0044	0.0037	0.0037	TRUE	NA
MGG_04037	1310	1389	2469	2941	1275	1380	2710	2738	2025.73	1328	2724	2.052	1.037	3.45066e-43	3.36744e-42	0.0005	0.0024	0.0022	0.0022	TRUE	NA
MGG_06000	24914	24547	30480	35913	24247	24388	33452	33437	28881	24318	33444	1.375	0.46	3.60454e-43	3.5145e-42	0	0.0006	0.0005	0.0005	TRUE	NA
MGG_05026	9975	10093	5906	6843	9708	10028	6482	6371	8147.14	9868	6426	0.651	-0.619	3.74545e-43	3.64755e-42	0.0002	0.001	0.0008	0.0008	TRUE	NA
MGG_07237	7441	7660	10447	13313	7242	7610	11466	12395	9678.24	7426	11930	1.607	0.684	3.74759e-43	3.64755e-42	0.0019	0.0009	0.0011	0.0011	TRUE	NA
MGG_01183	1677	1658	622	697	1632	1647	683	649	1152.73	1640	666	0.406	-1.301	4.31225e-43	4.19344e-42	0	0.0038	0.0032	0.0032	TRUE	NA
MGG_07494	122	129	550	719	119	128	604	669	379.99	124	636	5.16	2.367	4.91671e-43	4.77703e-42	0	0.0106	0.0095	0.0095	TRUE	NA
MGG_00930	2138	2171	3479	4435	2081	2157	3818	4129	3046.29	2119	3974	1.876	0.908	5.37883e-43	5.22143e-42	0.0016	0.0018	0.0017	0.0017	TRUE	NA
MGG_10657	1480	1373	447	572	1440	1364	491	533	956.9	1402	512	0.365	-1.453	5.4989e-43	5.33331e-42	0	0.0045	0.004	0.004	TRUE	NA
MGG_09179	211	158	708	918	205	157	777	855	498.52	181	816	4.503	2.171	6.61393e-43	6.40913e-42	0.0133	0.0082	0.0087	0.0087	TRUE	NA
MGG_02696	57554	51068	32340	36404	56012	50737	35493	33895	44034.3	53374	34694	0.65	-0.622	6.63321e-43	6.42218e-42	0.0029	0.0006	0.001	0.001	TRUE	NA
MGG_04370	99	100	529	588	96	99	581	547	330.94	98	564	5.763	2.527	6.8669e-43	6.64261e-42	0	0.0121	0.0104	0.0104	TRUE	NA
MGG_09061	836	747	177	176	814	742	194	164	478.47	778	179	0.23	-2.123	8.03733e-43	7.76801e-42	0.0044	0.0085	0.008	0.008	TRUE	NA
MGG_12813	555	504	1258	1523	540	501	1381	1418	959.89	520	1400	2.689	1.427	9.45733e-43	9.13244e-42	0	0.0045	0.0039	0.0039	TRUE	NA
MGG_06689	3454	3625	5345	6754	3361	3602	5866	6288	4779.39	3482	6077	1.746	0.804	1.02783e-42	9.91654e-42	0.0019	0.0013	0.0014	0.0014	TRUE	NA
MGG_12492	1049	1013	277	344	1021	1006	304	320	662.91	1014	312	0.308	-1.698	1.33554e-42	1.28741e-41	0	0.0063	0.0053	0.0053	TRUE	NA
MGG_04845	2405	2184	943	1101	2341	2170	1035	1025	1642.62	2256	1030	0.457	-1.131	1.35471e-42	1.30475e-41	0.0012	0.0028	0.0026	0.0026	TRUE	NA
MGG_16743	502	538	1239	1538	489	535	1360	1432	953.71	512	1396	2.73	1.449	1.35908e-42	1.30782e-41	0.0009	0.0045	0.0041	0.0041	TRUE	NA
MGG_13224	403	388	1054	1223	392	385	1157	1139	768.29	388	1148	2.951	1.561	1.83793e-42	1.76707e-41	0	0.0055	0.0046	0.0046	TRUE	NA
MGG_17820	3622	3501	1719	2063	3525	3478	1887	1921	2702.67	3502	1904	0.544	-0.879	2.10227e-42	2.01946e-41	0	0.0019	0.0016	0.0016	TRUE	NA
MGG_06327	1605	1529	2929	3169	1562	1519	3215	2951	2311.56	1540	3083	2	1	2.19779e-42	2.10938e-41	0.0018	0.0022	0.0021	0.0021	TRUE	NA
MGG_04395	1067	873	2145	2402	1038	867	2354	2236	1624.08	952	2295	2.408	1.268	2.54742e-42	2.44282e-41	0.0072	0.0029	0.0034	0.0034	TRUE	NA
MGG_06571	18388	18408	11414	13659	17895	18289	12527	12717	15357.1	18092	12622	0.698	-0.519	2.76167e-42	2.64598e-41	0.0001	0.0007	0.0006	0.0006	TRUE	NA
MGG_03406	3057	3130	1451	1655	2975	3110	1592	1541	2304.56	3042	1566	0.515	-0.958	2.93715e-42	2.81167e-41	0	0.0022	0.0019	0.0019	TRUE	NA
MGG_09535	5568	5713	3021	3551	5419	5676	3316	3306	4429.15	5548	3311	0.597	-0.745	5.4298e-42	5.19333e-41	0.0004	0.0014	0.0012	0.0012	TRUE	NA
MGG_03754	367	375	989	1200	357	373	1085	1117	733.11	365	1101	3.019	1.594	7.20074e-42	6.88119e-41	0	0.0057	0.0048	0.0048	TRUE	NA
MGG_09125	5541	5413	7559	8881	5393	5378	8296	8269	6833.83	5386	8282	1.538	0.621	7.27206e-42	6.94334e-41	0	0.0011	0.0009	0.0009	TRUE	NA
MGG_01473	3352	3444	1541	1931	3262	3422	1691	1798	2543.26	3342	1744	0.522	-0.937	8.43591e-42	8.04763e-41	0.001	0.002	0.0019	0.0019	TRUE	NA
MGG_00111	554	524	1244	1528	539	521	1365	1423	961.93	530	1394	2.631	1.396	9.27109e-42	8.83673e-41	0	0.0045	0.0038	0.0038	TRUE	NA
MGG_03734	750	756	1588	1852	730	751	1743	1724	1237.05	740	1734	2.341	1.227	1.07638e-41	1.02507e-40	0	0.0036	0.003	0.003	TRUE	NA
MGG_04342	4168	4120	6021	6931	4056	4093	6608	6453	5302.74	4074	6530	1.602	0.68	1.18155e-41	1.12425e-40	0	0.0012	0.001	0.001	TRUE	NA
MGG_06863	375	420	1063	1270	365	417	1167	1182	782.83	391	1174	3.004	1.587	1.30411e-41	1.2398e-40	0	0.0054	0.0049	0.0049	TRUE	NA
MGG_16793	1029	1040	2052	2294	1001	1033	2252	2136	1605.66	1017	2194	2.156	1.108	1.49715e-41	1.4221e-40	0	0.0029	0.0025	0.0025	TRUE	NA
MGG_02485	1810	1896	3178	3635	1762	1884	3488	3384	2629.38	1823	3436	1.885	0.915	1.69838e-41	1.61186e-40	0.0008	0.002	0.0018	0.0018	TRUE	NA
MGG_04956	439	412	1156	1250	427	409	1269	1164	817.28	418	1216	2.906	1.539	1.79076e-41	1.69807e-40	0	0.0052	0.0047	0.0047	TRUE	NA
MGG_08918	599	536	1338	1544	583	533	1468	1438	1005.38	558	1453	2.604	1.381	1.91529e-41	1.8146e-40	0	0.0043	0.0038	0.0038	TRUE	NA
MGG_10957	5281	5247	2845	3333	5140	5213	3122	3103	4144.55	5176	3112	0.601	-0.734	2.358e-41	2.23212e-40	0	0.0014	0.0012	0.0012	TRUE	NA
MGG_01721	3274	3205	1544	1846	3186	3184	1695	1719	2445.96	3185	1707	0.536	-0.9	2.85392e-41	2.69925e-40	0	0.0021	0.0017	0.0017	TRUE	NA
MGG_15048	562	521	1301	1467	547	518	1428	1366	964.57	532	1397	2.623	1.391	3.73569e-41	3.53021e-40	0	0.0045	0.0039	0.0039	TRUE	NA
MGG_14797	2707	2584	1201	1294	2634	2567	1318	1205	1931.16	2600	1262	0.485	-1.045	4.04087e-41	3.81534e-40	0.001	0.0025	0.0023	0.0023	TRUE	NA
MGG_05423	1096	1102	2080	2402	1067	1095	2283	2236	1670.18	1081	2260	2.091	1.064	4.1368e-41	3.90258e-40	0	0.0028	0.0023	0.0023	TRUE	NA
MGG_03600	16025	15697	9994	11588	15596	15595	10968	10789	13237.2	15596	10878	0.698	-0.52	4.19131e-41	3.95064e-40	0	0.0008	0.0006	0.0006	TRUE	NA
MGG_04519	3475	3742	5631	6463	3382	3718	6180	6017	4824.3	3550	6098	1.718	0.781	5.50812e-41	5.1874e-40	0.002	0.0013	0.0014	0.0014	TRUE	NA
MGG_16230	7851	7545	4444	5210	7641	7496	4877	4851	6216.24	7568	4864	0.643	-0.638	5.91501e-41	5.56585e-40	0	0.0011	0.0009	0.0009	TRUE	NA
MGG_03651	1616	1643	2740	3484	1573	1632	3007	3244	2364.02	1602	3126	1.951	0.964	6.22151e-41	5.84928e-40	0.0015	0.0021	0.002	0.002	TRUE	NA
MGG_04682	1901	1705	3036	3753	1850	1694	3332	3494	2592.59	1772	3413	1.926	0.946	6.50013e-41	6.10603e-40	0.0016	0.002	0.002	0.002	TRUE	NA
MGG_02612	6724	6833	3767	4495	6544	6789	4134	4185	5413.01	6666	4160	0.624	-0.68	6.78459e-41	6.36783e-40	0	0.0012	0.001	0.001	TRUE	NA
MGG_13154	955	853	1897	2110	929	847	2082	1965	1455.85	888	2024	2.276	1.187	7.32758e-41	6.87163e-40	0.0019	0.0031	0.003	0.003	TRUE	NA
MGG_00167	9132	8973	5382	6262	8887	8915	5907	5830	7384.84	8901	5868	0.659	-0.601	7.58366e-41	7.10574e-40	0	0.001	0.0008	0.0008	TRUE	NA
MGG_00863	969	1061	2076	2325	943	1054	2278	2165	1610.08	998	2222	2.224	1.153	8.7147e-41	8.15859e-40	0.0027	0.0029	0.0029	0.0029	TRUE	NA
MGG_07317	4453	4261	6296	7219	4334	4233	6910	6721	5549.59	4284	6816	1.591	0.67	1.06313e-40	9.94441e-40	0	0.0012	0.001	0.001	TRUE	NA
MGG_03551	3262	3146	1551	1685	3175	3126	1702	1569	2392.83	3150	1636	0.519	-0.947	1.08314e-40	1.0123e-39	0.0008	0.0021	0.0019	0.0019	TRUE	NA
MGG_06773	104	84	481	596	101	83	528	555	316.87	92	542	5.862	2.551	1.26085e-40	1.1774e-39	0	0.0126	0.0113	0.0113	TRUE	NA
MGG_12015	2	7	507	506	2	7	556	471	259.11	4	514	115.981	6.858	1.61053e-40	1.50266e-39	0.0138	0.0153	0.0152	0.0152	TRUE	NA
MGG_12798	1870	1763	700	693	1820	1752	768	645	1246.24	1786	706	0.395	-1.34	1.65783e-40	1.54549e-39	0.006	0.0036	0.0039	0.0039	TRUE	NA
MGG_05260	1884	1814	688	878	1834	1802	755	817	1302.09	1818	786	0.433	-1.208	1.66328e-40	1.54926e-39	0	0.0034	0.003	0.003	TRUE	NA
MGG_02330	35	15	2045	2231	34	15	2244	2077	1092.64	24	2160	88.149	6.462	1.66566e-40	1.55018e-39	0.0927	0.004	0.0041	0.0927	TRUE	NA
MGG_07929	10130	9188	5501	6221	9859	9128	6037	5792	7704.16	9494	5914	0.623	-0.683	1.75816e-40	1.63488e-39	0.0016	0.001	0.0011	0.0011	TRUE	NA
MGG_03036	5507	5195	2889	3386	5359	5161	3171	3153	4211.03	5260	3162	0.601	-0.735	1.97692e-40	1.83676e-39	0	0.0014	0.0012	0.0012	TRUE	NA
MGG_15725	285	318	904	1033	277	316	992	962	636.81	296	977	3.293	1.72	2.52847e-40	2.34539e-39	0.0001	0.0065	0.0059	0.0059	TRUE	NA
MGG_17186	10858	11711	5882	7455	10567	11635	6456	6941	8899.72	11101	6698	0.604	-0.728	2.52861e-40	2.34539e-39	0.0034	0.0009	0.0013	0.0013	TRUE	NA
MGG_07457	1059	1018	308	305	1031	1011	338	284	666.01	1021	311	0.304	-1.719	2.9132e-40	2.69985e-39	0.0028	0.0062	0.0059	0.0059	TRUE	NA
MGG_17439	5153	4636	2498	2718	5015	4606	2742	2531	3723.28	4810	2636	0.548	-0.869	3.21756e-40	2.97941e-39	0.0028	0.0015	0.0018	0.0018	TRUE	NA
MGG_03168	211	229	723	882	205	228	793	821	511.89	216	807	3.732	1.9	3.25478e-40	3.01135e-39	0	0.008	0.0069	0.0069	TRUE	NA
MGG_17038	255	229	780	900	248	228	856	838	542.42	238	847	3.56	1.832	3.55566e-40	3.28697e-39	0	0.0076	0.0065	0.0065	TRUE	NA
MGG_02328	743	726	169	180	723	721	185	168	449.37	722	176	0.244	-2.035	3.72026e-40	3.43627e-39	0	0.009	0.0078	0.0078	TRUE	NA
MGG_07593	4	4	464	656	4	4	509	611	281.97	4	560	142.506	7.155	4.12122e-40	3.80344e-39	0	0.0141	0.014	0.014	TRUE	NA
MGG_17153	406604	396654	471070	550617	395713	394084	517001	512661	454865	394898	514831	1.304	0.383	5.35763e-40	4.94038e-39	0	0.0005	0.0004	0.0004	TRUE	NA
MGG_05442	19	24	295	379	18	24	324	353	179.74	21	338	16.005	4	1.18057e-39	1.08772e-38	0	0.0218	0.0195	0.0195	TRUE	NA
MGG_10334	9207	8872	5359	6339	8960	8815	5882	5902	7389.61	8888	5892	0.663	-0.593	1.32804e-39	1.22257e-38	0	0.001	0.0008	0.0008	TRUE	NA
MGG_11335	5324	4907	2729	3081	5181	4875	2995	2869	3980.08	5028	2932	0.583	-0.779	1.72647e-39	1.58803e-38	0.0012	0.0015	0.0014	0.0014	TRUE	NA
MGG_08361	1159	957	272	341	1128	951	299	317	673.69	1040	308	0.297	-1.754	1.74218e-39	1.60116e-38	0.0078	0.0062	0.0064	0.0064	TRUE	NA
MGG_02514	1212	1195	2154	2566	1180	1187	2364	2389	1779.98	1184	2376	2.008	1.006	1.81051e-39	1.66257e-38	0	0.0026	0.0022	0.0022	TRUE	NA
MGG_02208	12	14	273	393	12	14	300	366	172.78	13	333	26.054	4.703	2.19374e-39	2.01281e-38	0	0.0227	0.0217	0.0217	TRUE	NA
MGG_15495	2306	2318	1007	1202	2244	2303	1105	1119	1692.89	2274	1112	0.489	-1.031	3.18377e-39	2.91877e-38	0	0.0028	0.0023	0.0023	TRUE	NA
MGG_02101	1411	1440	509	594	1373	1431	559	553	978.89	1402	556	0.396	-1.335	3.2677e-39	2.99322e-38	0	0.0044	0.0037	0.0037	TRUE	NA
MGG_02958	865	832	1771	1943	842	827	1944	1809	1355.29	834	1876	2.248	1.169	3.39653e-39	3.10865e-38	0	0.0033	0.003	0.003	TRUE	NA
MGG_04920	2032	1846	3312	3716	1978	1834	3635	3460	2726.6	1906	3548	1.861	0.896	3.94824e-39	3.61061e-38	0.0015	0.0019	0.0019	0.0019	TRUE	NA
MGG_04933	2083	2032	3434	3809	2027	2019	3769	3546	2840.32	2023	3658	1.807	0.854	4.49185e-39	4.10434e-38	0.0007	0.0018	0.0017	0.0017	TRUE	NA
MGG_03727	13213	13501	8090	9673	12859	13414	8879	9006	11039.4	13136	8942	0.681	-0.555	4.64017e-39	4.23286e-38	0.0003	0.0008	0.0008	0.0008	TRUE	NA
MGG_08698	540	501	85	76	526	498	93	71	296.83	512	82	0.159	-2.649	4.63984e-39	4.23286e-38	0.0004	0.0134	0.0126	0.0126	TRUE	NA
MGG_05531	2119	1830	766	886	2062	1818	841	825	1386.5	1940	833	0.429	-1.221	7.13688e-39	6.50504e-38	0.0038	0.0033	0.0033	0.0033	TRUE	NA
MGG_06189	85004	82068	98436	116155	82727	81536	108034	108148	95111.3	82132	108091	1.316	0.396	7.27896e-39	6.62907e-38	0	0.0005	0.0004	0.0004	TRUE	NA
MGG_12848	12	10	280	365	12	10	307	340	167.19	11	324	29.937	4.904	8.26602e-39	7.52181e-38	0	0.0234	0.021	0.021	TRUE	NA
MGG_07887	493	486	62	88	480	483	68	82	278.16	482	75	0.156	-2.677	8.70789e-39	7.91737e-38	0	0.0143	0.0126	0.0126	TRUE	NA
MGG_00837	234	228	824	836	228	227	904	778	534.24	228	841	3.701	1.888	9.17812e-39	8.33805e-38	0.0049	0.0077	0.0073	0.0073	TRUE	NA
MGG_13455	3469	3578	1535	2032	3376	3555	1685	1892	2626.87	3466	1788	0.517	-0.953	1.00511e-38	9.12363e-38	0.0032	0.002	0.0022	0.0022	TRUE	NA
MGG_00919	1964	1769	728	872	1911	1758	799	812	1319.95	1834	806	0.439	-1.187	1.09514e-38	9.93272e-38	0.0015	0.0034	0.0031	0.0031	TRUE	NA
MGG_08898	6444	6218	3625	4105	6271	6178	3978	3822	5062.4	6224	3900	0.626	-0.675	1.55086e-38	1.40544e-37	0.0002	0.0013	0.0011	0.0011	TRUE	NA
MGG_00715	265710	259342	180387	205358	258593	257662	197975	191202	226358	258128	194588	0.754	-0.408	1.77141e-38	1.604e-37	0.0003	0.0005	0.0005	0.0005	TRUE	NA
MGG_15280	2127	1845	3549	3908	2070	1833	3895	3639	2859.18	1952	3767	1.929	0.948	1.78867e-38	1.6183e-37	0.0041	0.0018	0.0022	0.0022	TRUE	NA
MGG_18138	1920	1937	803	929	1869	1924	881	865	1384.82	1896	873	0.46	-1.119	1.80108e-38	1.62819e-37	0	0.0033	0.0027	0.0027	TRUE	NA
MGG_07609	68	61	402	471	66	61	441	439	251.63	64	440	6.937	2.794	2.07475e-38	1.87406e-37	0	0.0157	0.0134	0.0134	TRUE	NA
MGG_03556	2199	2023	870	1059	2140	2010	955	986	1522.7	2075	970	0.468	-1.096	2.17537e-38	1.96334e-37	0	0.003	0.0027	0.0027	TRUE	NA
MGG_02532	882	821	220	263	858	816	241	245	540.09	837	243	0.291	-1.783	2.4862e-38	2.24205e-37	0	0.0076	0.0064	0.0064	TRUE	NA
MGG_17884	805	885	1867	1989	783	879	2049	1852	1390.91	831	1950	2.345	1.23	2.5825e-38	2.32699e-37	0.005	0.0033	0.0035	0.0035	TRUE	NA
MGG_02451	983	915	276	297	957	909	303	277	611.29	933	290	0.31	-1.689	3.49387e-38	3.14562e-37	0	0.0068	0.0059	0.0059	TRUE	NA
MGG_09367	18336	17286	11282	12934	17845	17174	12382	12042	14860.8	17510	12212	0.697	-0.52	3.58721e-38	3.22703e-37	0.0004	0.0008	0.0007	0.0007	TRUE	NA
MGG_09996	293	379	993	1203	285	377	1090	1120	717.9	331	1105	3.342	1.741	3.66043e-38	3.29022e-37	0.0153	0.0058	0.0068	0.0068	TRUE	NA
MGG_07613	2876	2935	4332	5106	2799	2916	4754	4754	3805.84	2858	4754	1.664	0.735	7.01812e-38	6.30318e-37	0	0.0015	0.0013	0.0013	TRUE	NA
MGG_10061	5313	5099	2857	3095	5171	5066	3136	2882	4063.47	5118	3009	0.587	-0.768	7.77748e-38	6.97951e-37	0.0014	0.0014	0.0014	0.0014	TRUE	NA
MGG_07197	2868	3077	1305	1637	2791	3057	1432	1524	2201.16	2924	1478	0.506	-0.983	8.21616e-38	7.3672e-37	0.0027	0.0022	0.0023	0.0023	TRUE	NA
MGG_00567	917	924	1808	2037	892	918	1984	1897	1422.83	905	1940	2.143	1.1	1.53822e-37	1.37816e-36	0	0.0032	0.0027	0.0027	TRUE	NA
MGG_03931	3070	3211	1523	1753	2988	3190	1671	1632	2370.41	3089	1652	0.535	-0.903	1.96098e-37	1.7555e-36	0.001	0.0021	0.0019	0.0019	TRUE	NA
MGG_15988	8163	8226	10676	12543	7944	8173	11717	11678	9878.09	8058	11698	1.452	0.538	2.33622e-37	2.08973e-36	0	0.0009	0.0007	0.0007	TRUE	NA
MGG_07144	969	983	1831	2508	943	977	2010	2335	1566.08	960	2172	2.265	1.18	2.44692e-37	2.18699e-36	0.0057	0.0029	0.0034	0.0034	TRUE	NA
MGG_00432	40472	41520	26339	31688	39388	41251	28907	29504	34762.4	40320	29206	0.724	-0.465	2.55531e-37	2.28202e-36	0.0006	0.0006	0.0006	0.0006	TRUE	NA
MGG_02371	330	261	916	1009	321	259	1005	939	631.31	290	972	3.348	1.743	2.58265e-37	2.30457e-36	0.008	0.0066	0.0067	0.0067	TRUE	NA
MGG_03149	5609	5252	3003	3494	5459	5218	3296	3253	4306.42	5338	3274	0.613	-0.705	3.19252e-37	2.84647e-36	0.0004	0.0014	0.0012	0.0012	TRUE	NA
MGG_12676	78	69	439	470	76	69	482	438	265.97	72	460	6.359	2.669	3.22921e-37	2.87686e-36	0	0.0149	0.0132	0.0132	TRUE	NA
MGG_05108	9	13	300	313	9	13	329	291	160.59	11	310	28.663	4.841	3.63751e-37	3.238e-36	0	0.0244	0.0223	0.0223	TRUE	NA
MGG_00447	6402	6742	8972	10705	6231	6698	9847	9967	8185.67	6464	9907	1.533	0.616	3.74501e-37	3.33101e-36	0.0011	0.001	0.001	0.001	TRUE	NA
MGG_01578	2723	2660	3967	4869	2650	2643	4354	4533	3545	2646	4444	1.679	0.748	3.83219e-37	3.40581e-36	0	0.0016	0.0014	0.0014	TRUE	NA
MGG_12357	1056	1022	1894	2254	1028	1015	2079	2099	1555.1	1022	2089	2.045	1.032	5.73899e-37	5.09635e-36	0	0.003	0.0024	0.0024	TRUE	NA
MGG_10583	12052	12279	7250	8873	11729	12199	7957	8261	10036.7	11964	8109	0.678	-0.561	8.6166e-37	7.64558e-36	0.0005	0.0009	0.0008	0.0008	TRUE	NA
MGG_16895	5937	5854	3375	3760	5778	5816	3704	3501	4699.73	5797	3602	0.621	-0.687	9.16573e-37	8.12631e-36	0.0004	0.0013	0.0012	0.0012	TRUE	NA
MGG_08093	3300	3350	1586	1982	3212	3328	1741	1845	2531.48	3270	1793	0.549	-0.866	9.66961e-37	8.56617e-36	0.0006	0.002	0.0018	0.0018	TRUE	NA
MGG_10941	1571	1383	2610	3005	1529	1374	2864	2798	2141.32	1452	2831	1.95	0.964	1.13746e-36	1.00685e-35	0.0019	0.0023	0.0023	0.0023	TRUE	NA
MGG_00019	43	32	359	365	42	32	394	340	201.87	37	367	9.949	3.315	1.26751e-36	1.12107e-35	0	0.0195	0.0183	0.0183	TRUE	NA
MGG_15644	69	79	408	494	67	78	448	460	263.34	72	454	6.236	2.641	1.28326e-36	1.1341e-35	0	0.015	0.0131	0.0131	TRUE	NA
MGG_09212	3317	3183	1643	1884	3228	3162	1803	1754	2486.96	3195	1778	0.556	-0.846	1.37232e-36	1.21183e-35	0	0.002	0.0017	0.0017	TRUE	NA
MGG_01952	3566	3253	1699	1877	3470	3232	1865	1748	2578.67	3351	1806	0.539	-0.893	1.49743e-36	1.32126e-35	0.0019	0.002	0.002	0.002	TRUE	NA
MGG_12322	2236	2229	3409	4079	2176	2215	3741	3798	2982.47	2196	3770	1.717	0.78	1.59983e-36	1.41048e-35	0	0.0018	0.0015	0.0015	TRUE	NA
MGG_00634	8956	8553	5288	5944	8716	8498	5804	5534	7137.89	8607	5669	0.658	-0.603	2.42461e-36	2.13594e-35	0.0004	0.001	0.001	0.001	TRUE	NA
MGG_08207	1220	1201	422	483	1187	1193	463	450	823.35	1190	456	0.383	-1.383	2.96335e-36	2.60846e-35	0	0.0052	0.0043	0.0043	TRUE	NA
MGG_07573	785	676	165	202	764	672	181	188	451.19	718	184	0.257	-1.959	3.23711e-36	2.84716e-35	0	0.009	0.0082	0.0082	TRUE	NA
MGG_11643	1344	1270	2231	2693	1308	1262	2449	2507	1881.42	1285	2478	1.929	0.948	3.45958e-36	3.04041e-35	0	0.0025	0.0021	0.0021	TRUE	NA
MGG_07455	1626	1681	644	780	1582	1670	707	726	1171.39	1626	716	0.441	-1.182	4.17836e-36	3.66918e-35	0	0.0038	0.0033	0.0033	TRUE	NA
MGG_09668	3185	2887	4752	5299	3100	2868	5215	4934	4029.26	2984	5074	1.7	0.766	4.2936e-36	3.76739e-35	0.0017	0.0014	0.0015	0.0015	TRUE	NA
MGG_10565	3929	3785	2043	2253	3824	3760	2242	2098	2981.03	3792	2170	0.572	-0.806	4.40676e-36	3.86361e-35	0.0006	0.0018	0.0016	0.0016	TRUE	NA
MGG_07935	622	629	139	139	605	625	153	129	378.06	615	141	0.229	-2.13	4.81148e-36	4.2151e-35	0	0.0106	0.0095	0.0095	TRUE	NA
MGG_02722	18004	17135	21588	25422	17522	17024	23693	23670	20477	17273	23682	1.371	0.455	5.31298e-36	4.65076e-35	0.0001	0.0007	0.0006	0.0006	TRUE	NA
MGG_05968	109	149	545	687	106	148	598	640	372.97	127	619	4.876	2.286	5.55411e-36	4.85798e-35	0.0189	0.0108	0.0113	0.0113	TRUE	NA
MGG_12043	4	2	539	639	4	2	592	595	298.1	3	594	201.146	7.652	5.82072e-36	5.08714e-35	0	0.0133	0.0119	0.0119	TRUE	NA
MGG_16341	5870	6193	8309	10620	5713	6153	9119	9888	7718.18	5933	9504	1.602	0.68	6.072e-36	5.30256e-35	0.0027	0.001	0.0013	0.0013	TRUE	NA
MGG_04114	21277	20859	13881	16073	20707	20724	15234	14965	17907.6	20716	15100	0.729	-0.456	6.43699e-36	5.61686e-35	0	0.0007	0.0006	0.0006	TRUE	NA
MGG_01719	2729	2595	1277	1373	2656	2578	1402	1278	1978.49	2617	1340	0.512	-0.967	6.56509e-36	5.72412e-35	0.0012	0.0024	0.0023	0.0023	TRUE	NA
MGG_05140	707	591	1619	1647	688	587	1777	1533	1146.39	638	1655	2.594	1.375	6.73725e-36	5.86959e-35	0.0106	0.0038	0.0047	0.0047	TRUE	NA
MGG_07972	229	238	690	897	223	236	757	835	512.94	230	796	3.469	1.795	7.27604e-36	6.334e-35	0	0.008	0.0071	0.0071	TRUE	NA
MGG_09404	504	455	79	70	490	452	87	65	273.61	471	76	0.16	-2.642	7.76779e-36	6.75675e-35	0.0045	0.0145	0.0137	0.0137	TRUE	NA
MGG_05807	289	350	932	1045	281	348	1023	973	656.21	314	998	3.173	1.666	8.29163e-36	7.20674e-35	0.0076	0.0063	0.0065	0.0065	TRUE	NA
MGG_14777	56	36	383	396	54	36	420	369	219.83	45	394	8.725	3.125	9.80965e-36	8.51943e-35	0.0188	0.0179	0.018	0.018	TRUE	NA
MGG_11739	2789	2571	4068	4720	2714	2554	4465	4395	3531.98	2634	4430	1.681	0.75	1.05102e-35	9.12066e-35	0.0005	0.0016	0.0014	0.0014	TRUE	NA
MGG_07137	12707	12412	7834	9395	12367	12332	8598	8747	10510.9	12350	8672	0.702	-0.51	1.1743e-35	1.01825e-34	0	0.0009	0.0007	0.0007	TRUE	NA
MGG_02557	328	311	24	22	319	309	26	20	168.76	314	23	0.074	-3.756	1.35439e-35	1.17349e-34	0	0.0232	0.0204	0.0204	TRUE	NA
MGG_17318	1127	1120	380	437	1097	1113	417	407	758.37	1105	412	0.373	-1.424	1.80241e-35	1.56044e-34	0	0.0055	0.0046	0.0046	TRUE	NA
MGG_00469	2112	2049	912	1093	2055	2036	1001	1018	1527.43	2046	1010	0.493	-1.019	1.87114e-35	1.61867e-34	0	0.003	0.0025	0.0025	TRUE	NA
MGG_16969	1171	1154	381	477	1140	1147	418	444	787.11	1144	431	0.377	-1.405	1.93156e-35	1.66963e-34	0	0.0054	0.0045	0.0045	TRUE	NA
MGG_07747	370	359	977	1056	360	357	1072	983	693.06	358	1028	2.866	1.519	1.96381e-35	1.69619e-34	0	0.006	0.0053	0.0053	TRUE	NA
MGG_07123	13107	12682	8192	9551	12756	12600	8991	8893	10809.8	12678	8942	0.705	-0.504	2.25205e-35	1.94363e-34	0	0.0009	0.0007	0.0007	TRUE	NA
MGG_03887	835	794	1585	1845	813	789	1740	1718	1264.71	801	1729	2.159	1.11	2.57941e-35	2.22441e-34	0	0.0035	0.0029	0.0029	TRUE	NA
MGG_12632	8649	8183	5070	5872	8417	8130	5564	5467	6894.72	8274	5516	0.667	-0.585	2.58907e-35	2.23101e-34	0.0003	0.0011	0.0009	0.0009	TRUE	NA
MGG_05934	3045	2834	1451	1622	2963	2816	1592	1510	2220.44	2890	1551	0.537	-0.898	2.72025e-35	2.34222e-34	0.0009	0.0022	0.002	0.002	TRUE	NA
MGG_01550	2930	3040	4358	5248	2852	3020	4783	4886	3885.24	2936	4834	1.647	0.72	2.94458e-35	2.5334e-34	0.0006	0.0015	0.0013	0.0013	TRUE	NA
MGG_05819	5	1	489	649	5	1	537	604	286.7	3	570	193.555	7.597	3.16255e-35	2.71881e-34	0.0056	0.0139	0.0132	0.0132	TRUE	NA
MGG_12370	1195	1185	401	495	1163	1177	440	461	810.32	1170	450	0.385	-1.376	3.37355e-35	2.89795e-34	0	0.0052	0.0044	0.0044	TRUE	NA
MGG_08163	3273	3012	1565	1702	3185	2992	1718	1585	2370.02	3088	1652	0.534	-0.905	4.11911e-35	3.53565e-34	0.0021	0.0021	0.0021	0.0021	TRUE	NA
MGG_01592	7353	7273	4382	4953	7156	7226	4809	4612	5950.69	7191	4710	0.655	-0.611	4.48007e-35	3.84249e-34	0.0002	0.0011	0.001	0.001	TRUE	NA
MGG_10275	872	684	182	197	849	680	200	183	477.84	764	192	0.25	-1.998	4.61164e-35	3.95227e-34	0.0137	0.0085	0.0093	0.0093	TRUE	NA
MGG_05359	3810	3531	1798	2249	3708	3508	1973	2094	2820.84	3608	2034	0.564	-0.826	4.96056e-35	4.24801e-34	0.0013	0.0019	0.0018	0.0018	TRUE	NA
MGG_08495	52	56	357	409	51	56	392	381	219.71	54	386	7.273	2.863	7.07611e-35	6.05498e-34	0	0.0179	0.0154	0.0154	TRUE	NA
MGG_15402	1042	841	261	263	1014	836	286	245	595.24	925	266	0.287	-1.803	7.59322e-35	6.49244e-34	0.0138	0.0069	0.0079	0.0079	TRUE	NA
MGG_03353	942	925	1736	2023	917	919	1905	1884	1406.15	918	1894	2.064	1.045	8.0344e-35	6.86435e-34	0	0.0032	0.0027	0.0027	TRUE	NA
MGG_11371	4923	4836	2631	3240	4791	4805	2888	3017	3875	4798	2952	0.616	-0.7	8.44708e-35	7.21135e-34	0	0.0015	0.0013	0.0013	TRUE	NA
MGG_04764	5029	4609	2556	3091	4894	4579	2805	2878	3789.14	4736	2842	0.6	-0.737	8.72311e-35	7.44125e-34	0.0011	0.0015	0.0014	0.0014	TRUE	NA
MGG_03643	624	618	1385	1491	607	614	1520	1388	1032.39	610	1454	2.38	1.251	9.54669e-35	8.13752e-34	0	0.0042	0.0038	0.0038	TRUE	NA
MGG_17472	1339	1267	480	554	1303	1259	527	516	901.13	1281	522	0.407	-1.297	9.56098e-35	8.14342e-34	0	0.0047	0.004	0.004	TRUE	NA
MGG_06069	294	254	789	912	286	252	866	849	563.39	269	858	3.184	1.671	1.05206e-34	8.95387e-34	0	0.0073	0.0065	0.0065	TRUE	NA
MGG_03441	7085	6920	4182	4827	6895	6875	4590	4494	5713.6	6885	4542	0.66	-0.6	1.05828e-34	8.99988e-34	0	0.0012	0.001	0.001	TRUE	NA
MGG_00552	7781	8047	10483	12142	7573	7995	11505	11305	9594.39	7784	11405	1.465	0.551	1.13101e-34	9.611e-34	0.0006	0.0009	0.0009	0.0009	TRUE	NA
MGG_07890	319	368	33	27	310	366	36	25	184.36	338	30	0.09	-3.475	1.47718e-34	1.2543e-33	0.0128	0.0213	0.0205	0.0205	TRUE	NA
MGG_04978	5463	5519	7286	8715	5317	5483	7996	8114	6727.64	5400	8055	1.492	0.577	1.51585e-34	1.28614e-33	0	0.0011	0.0009	0.0009	TRUE	NA
MGG_09879	60	82	389	508	58	81	427	473	259.94	70	450	6.443	2.688	1.63424e-34	1.38553e-33	0.0115	0.0152	0.015	0.015	TRUE	NA
MGG_17713	2114	2206	3487	3894	2057	2192	3827	3626	2925.41	2124	3726	1.754	0.81	1.89832e-34	1.60818e-33	0.0013	0.0018	0.0017	0.0017	TRUE	NA
MGG_09359	176	179	593	713	171	178	651	664	415.95	174	658	3.766	1.913	2.02464e-34	1.71389e-33	0	0.0097	0.0082	0.0082	TRUE	NA
MGG_02203	1014	1075	343	351	987	1068	376	327	689.53	1028	352	0.342	-1.55	2.02782e-34	1.71526e-33	0.0038	0.0061	0.0058	0.0058	TRUE	NA
MGG_01537	24473	23651	29081	33694	23817	23498	31917	31371	27650.8	23658	31644	1.338	0.42	2.1032e-34	1.77766e-33	0	0.0006	0.0005	0.0005	TRUE	NA
MGG_08835	14298	13520	8794	10387	13915	13432	9651	9671	11667.5	13674	9661	0.707	-0.501	3.00997e-34	2.54214e-33	0.0003	0.0008	0.0007	0.0007	TRUE	NA
MGG_01595	2570	2468	1087	1424	2501	2452	1193	1326	1868	2476	1260	0.509	-0.974	3.09049e-34	2.60815e-33	0.0017	0.0025	0.0025	0.0025	TRUE	NA
MGG_08962	2	3	614	717	2	3	674	668	336.59	2	671	272.826	8.092	3.1114e-34	2.62379e-33	0	0.0119	0.0106	0.0106	TRUE	NA
MGG_00692	5455	5641	2931	3692	5309	5604	3217	3437	4391.9	5456	3327	0.61	-0.713	3.3077e-34	2.78719e-33	0.0013	0.0014	0.0014	0.0014	TRUE	NA
MGG_05677	5370	5746	7679	9211	5226	5709	8428	8576	6984.68	5468	8502	1.555	0.637	3.40364e-34	2.86586e-33	0.0017	0.001	0.0012	0.0012	TRUE	NA
MGG_01330	12	6	267	301	12	6	293	280	147.73	9	286	32.403	5.018	3.55145e-34	2.98803e-33	0	0.0264	0.0241	0.0241	TRUE	NA
MGG_17794	146	137	564	603	142	136	619	561	364.66	139	590	4.24	2.084	3.67895e-34	3.09295e-33	0	0.011	0.0097	0.0097	TRUE	NA
MGG_08832	25962	26532	31679	38590	25267	26360	34768	35930	30581.1	25814	35349	1.369	0.454	3.74641e-34	3.14727e-33	0.0007	0.0006	0.0006	0.0006	TRUE	NA
MGG_02616	1827	1875	796	924	1778	1863	874	860	1343.71	1820	867	0.476	-1.07	4.16763e-34	3.49846e-33	0	0.0033	0.0029	0.0029	TRUE	NA
MGG_13782	24765	23617	16050	18603	24102	23464	17615	17321	20625.3	23783	17468	0.734	-0.445	4.3294e-34	3.6315e-33	0.0002	0.0007	0.0006	0.0006	TRUE	NA
MGG_07171	24996	24149	29251	34490	24326	23993	32103	32112	28133.6	24160	32108	1.329	0.41	5.21946e-34	4.37476e-33	0	0.0006	0.0005	0.0005	TRUE	NA
MGG_04629	2737	2892	4218	4918	2664	2873	4629	4579	3686.3	2768	4604	1.663	0.734	5.78308e-34	4.8435e-33	0.0009	0.0015	0.0015	0.0015	TRUE	NA
MGG_00591	142	107	536	593	138	106	588	552	346.22	122	570	4.66	2.22	6.60556e-34	5.52815e-33	0.0066	0.0116	0.0112	0.0112	TRUE	NA
MGG_10148	4766	4790	2604	3171	4638	4759	2858	2952	3801.9	4698	2905	0.618	-0.693	8.80437e-34	7.36274e-33	0	0.0015	0.0013	0.0013	TRUE	NA
MGG_01275	726	628	150	191	707	624	165	178	418.24	666	172	0.258	-1.956	9.6137e-34	8.03348e-33	0	0.0097	0.0089	0.0089	TRUE	NA
MGG_06494	4939	4930	6587	8292	4807	4898	7229	7720	6163.6	4852	7474	1.541	0.624	1.04949e-33	8.76317e-33	0.0008	0.0011	0.0011	0.0011	TRUE	NA
MGG_13033	625	613	1246	1611	608	609	1367	1500	1021.18	608	1434	2.357	1.237	1.08293e-33	9.03561e-33	0	0.0042	0.0039	0.0039	TRUE	NA
MGG_06209	2077	2081	3138	3840	2021	2068	3444	3575	2777.04	2044	3510	1.717	0.78	1.09841e-33	9.15787e-33	0	0.0019	0.0016	0.0016	TRUE	NA
MGG_09927	21533	21447	12562	16224	20956	21308	13787	15106	17789.2	21132	14446	0.684	-0.548	1.12054e-33	9.33533e-33	0.002	0.0007	0.0009	0.0009	TRUE	NA
MGG_01995	8054	7650	4654	5604	7838	7600	5108	5218	6441.04	7719	5163	0.669	-0.58	1.20565e-33	1.00368e-32	0.0002	0.0011	0.0009	0.0009	TRUE	NA
MGG_07195	14644	13892	9162	10566	14252	13802	10055	9838	11986.7	14027	9946	0.709	-0.496	1.45061e-33	1.20669e-32	0.0003	0.0008	0.0007	0.0007	TRUE	NA
MGG_12655	21	19	277	291	20	19	304	271	153.57	20	288	14.611	3.869	1.50005e-33	1.24688e-32	0	0.0254	0.0226	0.0226	TRUE	NA
MGG_06720	12599	12112	7865	9231	12262	12034	8632	8595	10380.4	12148	8614	0.709	-0.496	1.68634e-33	1.40068e-32	0	0.0009	0.0007	0.0007	TRUE	NA
MGG_07434	1713	1630	2707	3109	1667	1619	2971	2895	2288.05	1643	2933	1.784	0.835	1.94541e-33	1.61465e-32	0	0.0022	0.0018	0.0018	TRUE	NA
MGG_14513	1908	1766	766	938	1857	1755	841	873	1331.37	1806	857	0.475	-1.075	2.0341e-33	1.68699e-32	0	0.0034	0.003	0.003	TRUE	NA
MGG_01637	2306	2428	1083	1294	2244	2412	1189	1205	1762.47	2328	1197	0.514	-0.96	2.14906e-33	1.781e-32	0.0011	0.0027	0.0024	0.0024	TRUE	NA
MGG_07408	744	728	196	228	724	723	215	212	468.69	724	214	0.295	-1.76	2.4839e-33	2.05694e-32	0	0.0087	0.0072	0.0072	TRUE	NA
MGG_07043	59814	58971	41028	48250	58212	58589	45028	44924	51688.3	58400	44976	0.77	-0.377	2.48992e-33	2.06039e-32	0	0.0006	0.0005	0.0005	TRUE	NA
MGG_06154	3777	3692	2022	2285	3676	3668	2219	2127	2922.64	3672	2173	0.592	-0.757	2.89408e-33	2.39303e-32	0	0.0018	0.0015	0.0015	TRUE	NA
MGG_07503	502	429	1098	1258	489	426	1205	1171	822.78	458	1188	2.597	1.377	2.9476e-33	2.43546e-32	0.0018	0.0052	0.0048	0.0048	TRUE	NA
MGG_00698	1174	1250	436	491	1143	1242	479	457	830.03	1192	468	0.392	-1.35	3.25727e-33	2.68932e-32	0	0.0051	0.0046	0.0046	TRUE	NA
MGG_05310	1092	1073	380	408	1063	1066	417	380	731.43	1064	398	0.374	-1.419	3.39578e-33	2.80158e-32	0	0.0057	0.005	0.005	TRUE	NA
MGG_09913	1146	1066	2013	2252	1115	1059	2209	2097	1620.11	1087	2153	1.98	0.985	3.69865e-33	3.04917e-32	0	0.0029	0.0026	0.0026	TRUE	NA
MGG_14358	73	69	373	451	71	69	409	420	242.22	70	414	5.941	2.571	4.0974e-33	3.37539e-32	0	0.0163	0.0138	0.0138	TRUE	NA
MGG_00917	1812	1791	748	934	1763	1779	821	870	1308.35	1771	846	0.478	-1.066	4.24561e-33	3.49488e-32	0	0.0034	0.0029	0.0029	TRUE	NA
MGG_08084	6482	6603	3767	4559	6308	6560	4134	4245	5311.9	6434	4190	0.651	-0.619	4.33217e-33	3.56348e-32	0.0004	0.0012	0.0011	0.0011	TRUE	NA
MGG_03317	4822	4854	2733	3184	4693	4823	2999	2965	3869.85	4758	2982	0.627	-0.674	4.83908e-33	3.97748e-32	0	0.0015	0.0012	0.0012	TRUE	NA
MGG_03301	864	821	1585	1851	841	816	1740	1723	1279.87	828	1732	2.09	1.064	5.38604e-33	4.42047e-32	0	0.0035	0.0029	0.0029	TRUE	NA
MGG_07858	55	34	347	379	54	34	381	353	205.25	44	367	8.39	3.069	5.38444e-33	4.42047e-32	0.0149	0.0192	0.019	0.019	TRUE	NA
MGG_02104	2330	2143	3562	3961	2268	2129	3909	3688	2998.49	2198	3798	1.727	0.788	5.59087e-33	4.58518e-32	0.0015	0.0018	0.0017	0.0017	TRUE	NA
MGG_10700	2135	2044	961	1111	2078	2031	1055	1034	1549.42	2054	1044	0.508	-0.976	6.15976e-33	5.04799e-32	0	0.003	0.0025	0.0025	TRUE	NA
MGG_05123	210	212	624	803	204	211	685	748	461.87	208	716	3.454	1.788	6.29055e-33	5.15135e-32	0	0.0088	0.0077	0.0077	TRUE	NA
MGG_11061	1655	1472	2633	3020	1611	1462	2890	2812	2193.67	1536	2851	1.855	0.891	7.33677e-33	6.00365e-32	0.0015	0.0022	0.0022	0.0022	TRUE	NA
MGG_09250	407	388	35	67	396	385	38	62	220.59	390	50	0.13	-2.94	8.85156e-33	7.23784e-32	0.0223	0.0179	0.018	0.018	TRUE	NA
MGG_10910	1	6	353	477	1	6	387	444	209.62	4	416	120.84	6.917	1.03588e-32	8.464e-32	0.0075	0.0188	0.018	0.018	TRUE	NA
MGG_05955	51	37	369	351	50	37	405	327	204.54	44	366	8.454	3.08	1.0473e-32	8.55101e-32	0.0204	0.0192	0.0194	0.0194	TRUE	NA
MGG_02812	1413	1373	532	652	1375	1364	584	607	982.55	1370	596	0.435	-1.201	1.12399e-32	9.17042e-32	0	0.0044	0.0037	0.0037	TRUE	NA
MGG_05949	2340	2116	1028	1110	2277	2102	1128	1033	1635.33	2190	1080	0.493	-1.02	1.18627e-32	9.67136e-32	0.0028	0.0028	0.0028	0.0028	TRUE	NA
MGG_03941	42	53	339	372	41	53	372	346	202.99	47	359	7.683	2.942	1.24564e-32	1.0148e-31	0	0.0194	0.0174	0.0174	TRUE	NA
MGG_06392	5265	5405	3060	3491	5124	5370	3358	3250	4275.67	5247	3304	0.63	-0.667	1.44241e-32	1.17423e-31	0.0006	0.0014	0.0013	0.0013	TRUE	NA
MGG_05709	2623	2524	3705	4609	2553	2508	4066	4291	3354.48	2530	4178	1.652	0.724	1.64098e-32	1.3349e-31	0.0006	0.0016	0.0015	0.0015	TRUE	NA
MGG_17596	2284	2203	1053	1244	2223	2189	1156	1158	1681.37	2206	1157	0.525	-0.931	1.65967e-32	1.34911e-31	0	0.0028	0.0023	0.0023	TRUE	NA
MGG_04405	1436	1557	2519	2932	1398	1547	2765	2730	2109.74	1472	2748	1.866	0.9	1.70097e-32	1.38166e-31	0.0016	0.0023	0.0022	0.0022	TRUE	NA
MGG_05152	675	656	1316	1569	657	652	1444	1461	1053.46	654	1452	2.22	1.151	1.93959e-32	1.57433e-31	0	0.0041	0.0034	0.0034	TRUE	NA
MGG_11649	946	907	1704	1959	921	901	1870	1824	1378.97	911	1847	2.027	1.02	2.01736e-32	1.63625e-31	0	0.0033	0.0027	0.0027	TRUE	NA
MGG_10153	6114	6186	8233	9375	5950	6146	9036	8729	7465.16	6048	8882	1.468	0.554	2.16348e-32	1.75349e-31	0.0004	0.001	0.0009	0.0009	TRUE	NA
MGG_12814	6346	6434	8230	10026	6176	6392	9032	9335	7733.91	6284	9184	1.462	0.548	3.36567e-32	2.72585e-31	0.0004	0.001	0.0009	0.0009	TRUE	NA
MGG_00802	2422	2155	3603	4104	2357	2141	3954	3821	3068.39	2249	3888	1.728	0.789	3.4088e-32	2.75875e-31	0.0019	0.0017	0.0018	0.0018	TRUE	NA
MGG_11039	1691	1645	700	845	1646	1634	768	787	1208.76	1640	778	0.474	-1.076	3.75876e-32	3.03975e-31	0	0.0037	0.003	0.003	TRUE	NA
MGG_01092	5318	5216	3073	3477	5176	5182	3373	3237	4241.93	5179	3305	0.638	-0.648	3.81617e-32	3.08392e-31	0	0.0014	0.0012	0.0012	TRUE	NA
MGG_07257	767	560	3941	4104	746	556	4325	3821	2362.3	651	4073	6.252	2.644	5.04148e-32	4.07114e-31	0.0233	0.0021	0.0042	0.0233	TRUE	NA
MGG_09351	511	523	107	115	497	520	117	107	310.36	508	112	0.22	-2.182	5.31645e-32	4.29006e-31	0	0.0128	0.011	0.011	TRUE	NA
MGG_09537	18836	19393	23227	28368	18331	19267	25492	26412	22375.8	18799	25952	1.381	0.465	5.93926e-32	4.78912e-31	0.0008	0.0007	0.0007	0.0007	TRUE	NA
MGG_13292	1665	1623	2647	3015	1620	1612	2905	2807	2236.29	1616	2856	1.767	0.821	6.90007e-32	5.55982e-31	0	0.0022	0.0019	0.0019	TRUE	NA
MGG_16445	13082	13336	16184	19393	12732	13250	17762	18056	15449.8	12991	17909	1.379	0.463	7.36307e-32	5.92856e-31	0.0003	0.0007	0.0007	0.0007	TRUE	NA
MGG_10591	2818	2867	4079	4804	2743	2848	4477	4473	3635.12	2796	4475	1.601	0.679	8.18008e-32	6.5816e-31	0	0.0016	0.0013	0.0013	TRUE	NA
MGG_03327	397	414	919	1223	386	411	1009	1139	736.25	398	1074	2.694	1.43	8.55428e-32	6.87766e-31	0.0039	0.0057	0.0054	0.0054	TRUE	NA
MGG_17729	18	17	217	355	18	17	238	331	150.77	18	284	16.551	4.049	1.03146e-31	8.28697e-31	0	0.0259	0.027	0.027	TRUE	NA
MGG_08923	2514	2470	1231	1301	2447	2454	1351	1211	1865.75	2450	1281	0.522	-0.937	1.03348e-31	8.29717e-31	0.0018	0.0026	0.0025	0.0025	TRUE	NA
MGG_16315	597	567	1181	1439	581	563	1296	1340	945.07	572	1318	2.304	1.204	1.13793e-31	9.12908e-31	0	0.0046	0.0038	0.0038	TRUE	NA
MGG_07610	643	704	1336	1641	626	699	1466	1528	1079.84	662	1497	2.26	1.177	1.15887e-31	9.29034e-31	0.0018	0.004	0.0038	0.0038	TRUE	NA
MGG_06837	5249	5220	3034	3559	5108	5186	3330	3314	4234.52	5147	3322	0.645	-0.632	1.1725e-31	9.39278e-31	0	0.0014	0.0012	0.0012	TRUE	NA
MGG_08281	4716	4601	2664	2935	4590	4571	2924	2733	3704.32	4580	2828	0.617	-0.696	1.20425e-31	9.64014e-31	0.0006	0.0015	0.0014	0.0014	TRUE	NA
MGG_06131	4912	4273	6653	7728	4780	4245	7302	7195	5880.68	4512	7248	1.606	0.683	1.26912e-31	1.0152e-30	0.0032	0.0011	0.0015	0.0015	TRUE	NA
MGG_07594	4	1	493	595	4	1	541	554	274.98	2	548	222.808	7.8	1.46724e-31	1.17284e-30	0	0.0144	0.013	0.013	TRUE	NA
MGG_05044	106	99	439	503	103	98	482	468	287.91	100	475	4.713	2.237	1.59612e-31	1.27494e-30	0	0.0138	0.0117	0.0117	TRUE	NA
MGG_05720	700	699	1341	1627	681	694	1472	1515	1090.58	688	1494	2.171	1.119	1.72186e-31	1.37437e-30	0	0.004	0.0034	0.0034	TRUE	NA
MGG_08981	1308	1160	2167	2471	1273	1152	2378	2301	1776.1	1212	2340	1.928	0.947	1.75831e-31	1.40246e-30	0.0018	0.0027	0.0025	0.0025	TRUE	NA
MGG_12983	6	8	269	268	6	8	295	250	139.64	7	272	39.53	5.305	1.79228e-31	1.42852e-30	0	0.0279	0.026	0.026	TRUE	NA
MGG_06062	7865	7597	4777	5392	7654	7548	5243	5020	6366.3	7601	5132	0.675	-0.567	1.97958e-31	1.57667e-30	0.0003	0.0011	0.001	0.001	TRUE	NA
MGG_13262	2405	2263	1127	1299	2341	2248	1237	1209	1758.81	2294	1223	0.533	-0.908	1.98612e-31	1.58074e-30	0	0.0027	0.0023	0.0023	TRUE	NA
MGG_11897	1039	1028	1770	2297	1011	1021	1943	2139	1528.44	1016	2041	2.009	1.007	2.15041e-31	1.71026e-30	0.002	0.003	0.0029	0.0029	TRUE	NA
MGG_06722	18358	18698	11760	14362	17866	18577	12907	13372	15680.4	18222	13140	0.721	-0.472	2.285e-31	1.816e-30	0.0006	0.0007	0.0007	0.0007	TRUE	NA
MGG_03205	19667	18855	12645	15130	19140	18733	13878	14087	16459.5	18936	13982	0.738	-0.437	2.44418e-31	1.94111e-30	0.0001	0.0007	0.0006	0.0006	TRUE	NA
MGG_07724	27	49	336	351	26	49	369	327	192.63	38	348	9.289	3.216	2.57777e-31	2.04573e-30	0.0556	0.0204	0.0221	0.0221	TRUE	NA
MGG_03463	2708	2760	3927	4642	2635	2742	4310	4322	3502.37	2688	4316	1.605	0.683	2.9012e-31	2.30076e-30	0	0.0016	0.0014	0.0014	TRUE	NA
MGG_01300	6993	6445	3979	4547	6806	6403	4367	4234	5452.36	6604	4300	0.651	-0.619	3.05283e-31	2.41927e-30	0.001	0.0012	0.0012	0.0012	TRUE	NA
MGG_04672	16895	16929	20193	24108	16442	16819	22162	22446	19467.5	16630	22304	1.341	0.424	3.10484e-31	2.45873e-30	0.0001	0.0007	0.0006	0.0006	TRUE	NA
MGG_14907	2547	2554	1244	1503	2479	2537	1365	1399	1945.23	2508	1382	0.551	-0.859	3.721e-31	2.94455e-30	0	0.0025	0.0021	0.0021	TRUE	NA
MGG_02842	3859	3935	2090	2526	3756	3910	2294	2352	3077.7	3833	2323	0.606	-0.722	4.02892e-31	3.18593e-30	0	0.0017	0.0015	0.0015	TRUE	NA
MGG_06285	2369	2353	3433	4098	2306	2338	3768	3816	3056.63	2322	3792	1.633	0.708	4.21371e-31	3.32968e-30	0	0.0018	0.0014	0.0014	TRUE	NA
MGG_08108	5350	4895	2898	3162	5207	4863	3181	2944	4048.64	5035	3062	0.608	-0.718	4.72931e-31	3.73443e-30	0.0021	0.0014	0.0016	0.0016	TRUE	NA
MGG_09272	3815	3518	1971	2259	3713	3495	2163	2103	2868.62	3604	2133	0.592	-0.757	5.29383e-31	4.17721e-30	0.0009	0.0018	0.0017	0.0017	TRUE	NA
MGG_03645	1600	1635	647	825	1557	1624	710	768	1164.94	1590	739	0.465	-1.104	5.47066e-31	4.31366e-30	0	0.0038	0.0034	0.0034	TRUE	NA
MGG_00195	40167	39204	46002	53891	39091	38950	50487	50176	44676.1	39020	50332	1.29	0.367	6.16679e-31	4.8591e-30	0	0.0006	0.0005	0.0005	TRUE	NA
MGG_14329	3269	3132	4510	5218	3181	3112	4950	4858	4025.3	3146	4904	1.558	0.64	6.67681e-31	5.25722e-30	0	0.0014	0.0012	0.0012	TRUE	NA
MGG_14115	2529	2435	1243	1352	2461	2419	1364	1259	1875.87	2440	1312	0.537	-0.897	6.81864e-31	5.36507e-30	0.0007	0.0025	0.0023	0.0023	TRUE	NA
MGG_00455	4206	3916	5630	6471	4093	3891	6179	6025	5046.96	3992	6102	1.528	0.612	9.37158e-31	7.36853e-30	0.0005	0.0013	0.0011	0.0011	TRUE	NA
MGG_11934	2325	2246	1122	1230	2263	2231	1231	1145	1717.7	2247	1188	0.528	-0.92	9.89403e-31	7.77378e-30	0.0003	0.0027	0.0024	0.0024	TRUE	NA
MGG_03116	2418	2371	1122	1404	2353	2356	1231	1307	1811.87	2354	1269	0.539	-0.89	1.00733e-30	7.90901e-30	0	0.0026	0.0023	0.0023	TRUE	NA
MGG_01079	4965	4673	6392	7555	4832	4643	7015	7034	5881.04	4738	7024	1.483	0.568	1.1106e-30	8.7136e-30	0.0002	0.0011	0.001	0.001	TRUE	NA
MGG_09994	248	225	656	808	241	224	720	752	484.29	232	736	3.167	1.663	1.11447e-30	8.73781e-30	0	0.0084	0.0072	0.0072	TRUE	NA
MGG_06647	35	21	267	318	34	21	293	296	161.01	28	294	10.71	3.421	1.18775e-30	9.30572e-30	0	0.0243	0.0229	0.0229	TRUE	NA
MGG_00220	1915	1743	819	880	1864	1732	899	819	1328.4	1798	859	0.477	-1.067	1.20912e-30	9.46647e-30	0.0025	0.0034	0.0033	0.0033	TRUE	NA
MGG_00097	2642	2722	1334	1587	2571	2704	1464	1478	2054.32	2638	1471	0.558	-0.843	1.34641e-30	1.05339e-29	0	0.0024	0.002	0.002	TRUE	NA
MGG_05346	968	857	1642	2026	942	851	1802	1886	1370.49	896	1844	2.057	1.04	1.37099e-30	1.07186e-29	0.0019	0.0033	0.0031	0.0031	TRUE	NA
MGG_06332	992	896	294	371	965	890	323	345	630.93	928	334	0.36	-1.473	1.49116e-30	1.16498e-29	0	0.0066	0.0058	0.0058	TRUE	NA
MGG_02923	1924	1999	3016	3502	1872	1986	3310	3261	2607.29	1929	3286	1.703	0.768	1.58127e-30	1.23451e-29	0.0003	0.002	0.0017	0.0017	TRUE	NA
MGG_11914	3591	3580	1716	2278	3495	3557	1883	2121	2763.98	3526	2002	0.568	-0.815	1.70489e-30	1.33008e-29	0.0028	0.0019	0.002	0.002	TRUE	NA
MGG_09134	20	20	261	263	19	20	286	245	142.66	20	266	13.497	3.755	2.069e-30	1.613e-29	0	0.0274	0.0247	0.0247	TRUE	NA
MGG_03014	5704	5291	3208	3630	5551	5257	3521	3380	4427.12	5404	3450	0.638	-0.648	2.1543e-30	1.67832e-29	0.001	0.0014	0.0013	0.0013	TRUE	NA
MGG_05528	2842	2759	4092	4612	2766	2741	4491	4294	3573.01	2754	4392	1.595	0.673	2.45437e-30	1.91075e-29	0	0.0016	0.0014	0.0014	TRUE	NA
MGG_01991	968	930	313	380	942	924	344	354	640.84	933	349	0.374	-1.419	2.52141e-30	1.96155e-29	0	0.0065	0.0054	0.0054	TRUE	NA
MGG_10562	1473	1529	617	737	1434	1519	677	686	1079	1476	682	0.462	-1.115	2.78488e-30	2.16499e-29	0	0.004	0.0035	0.0035	TRUE	NA
MGG_02829	15289	14657	18273	21055	14879	14562	20055	19604	17274.9	14720	19830	1.347	0.43	3.25873e-30	2.53159e-29	0.0001	0.0007	0.0006	0.0006	TRUE	NA
MGG_16181	391	372	865	1094	381	370	949	1019	679.51	376	984	2.625	1.392	3.41701e-30	2.65268e-29	0	0.0061	0.0053	0.0053	TRUE	NA
MGG_07255	3706	3620	4925	5954	3607	3597	5405	5544	4538.01	3602	5474	1.52	0.604	3.7964e-30	2.94514e-29	0	0.0013	0.0011	0.0011	TRUE	NA
MGG_06052	3609	3613	4866	5931	3512	3590	5340	5522	4491.13	3551	5431	1.53	0.613	5.42669e-30	4.20692e-29	0	0.0013	0.0012	0.0012	TRUE	NA
MGG_08300	4447	4096	2381	2748	4328	4069	2613	2559	3392.27	4198	2586	0.616	-0.7	5.51626e-30	4.27336e-29	0.0009	0.0016	0.0015	0.0015	TRUE	NA
MGG_06862	20	9	220	293	19	9	241	273	135.66	14	257	18.066	4.175	5.52973e-30	4.28079e-29	0.0093	0.0287	0.0282	0.0282	TRUE	NA
MGG_02346	392	413	978	1058	381	410	1073	985	712.56	396	1029	2.598	1.378	5.64347e-30	4.3644e-29	0	0.0059	0.0053	0.0053	TRUE	NA
MGG_06353	438	405	933	1140	426	402	1024	1061	728.51	414	1042	2.517	1.332	5.64563e-30	4.3644e-29	0	0.0058	0.0049	0.0049	TRUE	NA
MGG_02206	10	23	223	316	10	23	245	294	142.89	16	270	16.602	4.053	5.67624e-30	4.38499e-29	0.0832	0.0273	0.0289	0.0289	TRUE	NA
MGG_02392	5404	5158	3066	3256	5259	5125	3365	3032	4195.08	5192	3198	0.616	-0.7	5.84214e-30	4.51e-29	0.0024	0.0014	0.0016	0.0016	TRUE	NA
MGG_07912	6111	5718	7729	9005	5947	5681	8483	8384	7123.78	5814	8434	1.45	0.536	7.3284e-30	5.65341e-29	0.0003	0.001	0.0009	0.0009	TRUE	NA
MGG_15936	445	403	66	90	433	400	72	84	247.43	416	78	0.188	-2.411	7.8457e-30	6.04825e-29	0	0.016	0.0141	0.0141	TRUE	NA
MGG_06540	958	885	312	306	932	879	342	285	609.73	906	314	0.345	-1.534	8.06029e-30	6.20935e-29	0.005	0.0068	0.0066	0.0066	TRUE	NA
MGG_08439	184	138	560	652	179	137	615	607	384.46	158	611	3.862	1.949	9.12553e-30	7.02507e-29	0.0082	0.0105	0.0103	0.0103	TRUE	NA
MGG_15902	56	69	323	439	54	69	354	409	221.57	62	382	6.211	2.635	9.69715e-30	7.45992e-29	0	0.0178	0.0167	0.0167	TRUE	NA
MGG_15745	3594	3667	1987	2311	3498	3643	2181	2152	2868.35	3570	2166	0.607	-0.721	9.78476e-30	7.52207e-29	0	0.0018	0.0016	0.0016	TRUE	NA
MGG_01017	56	30	689	916	54	30	756	853	423.34	42	804	19.071	4.253	1.03446e-29	7.94693e-29	0.0555	0.0095	0.0107	0.0555	TRUE	NA
MGG_05759	110	96	440	482	107	95	483	449	283.53	101	466	4.599	2.201	1.0808e-29	8.29714e-29	0	0.014	0.0122	0.0122	TRUE	NA
MGG_09502	3337	3500	1736	2159	3248	3477	1905	2010	2660.09	3362	1958	0.583	-0.78	1.15811e-29	8.88445e-29	0.0015	0.0019	0.0019	0.0019	TRUE	NA
MGG_08440	633	528	1202	1470	616	525	1319	1369	957.12	570	1344	2.356	1.237	1.25583e-29	9.62748e-29	0.0043	0.0045	0.0045	0.0045	TRUE	NA
MGG_13200	2918	2972	1547	1783	2840	2953	1698	1660	2287.63	2896	1679	0.58	-0.787	1.43371e-29	1.09835e-28	0	0.0022	0.0019	0.0019	TRUE	NA
MGG_09273	751	726	203	262	731	721	223	244	479.73	726	234	0.322	-1.636	1.70414e-29	1.30462e-28	0	0.0085	0.0073	0.0073	TRUE	NA
MGG_01506	4538	4185	2449	2844	4416	4158	2688	2648	3477.52	4287	2668	0.622	-0.685	1.77982e-29	1.36161e-28	0.0008	0.0016	0.0015	0.0015	TRUE	NA
MGG_11913	1647	1846	2801	3388	1603	1834	3074	3154	2416.37	1718	3114	1.813	0.858	1.92181e-29	1.46922e-28	0.0038	0.0021	0.0023	0.0023	TRUE	NA
MGG_09839	930	919	320	352	905	913	351	328	624.27	909	340	0.373	-1.423	2.0329e-29	1.55307e-28	0	0.0066	0.0056	0.0056	TRUE	NA
MGG_00296	560	499	1272	1277	545	496	1396	1189	906.44	520	1292	2.481	1.311	2.12005e-29	1.61854e-28	0.0079	0.0047	0.0052	0.0052	TRUE	NA
MGG_00476	2282	2288	1010	1331	2221	2273	1108	1239	1710.44	2247	1174	0.523	-0.935	2.12309e-29	1.61974e-28	0.0019	0.0027	0.0027	0.0027	TRUE	NA
MGG_00254	5797	6038	7669	9445	5642	5999	8417	8794	7212.82	5820	8606	1.479	0.564	2.18082e-29	1.66263e-28	0.0011	0.001	0.0011	0.0011	TRUE	NA
MGG_03310	2459	2525	1206	1483	2393	2509	1324	1381	1901.53	2451	1352	0.552	-0.857	2.26594e-29	1.72633e-28	0	0.0025	0.0022	0.0022	TRUE	NA
MGG_06660	2198	2210	1081	1238	2139	2196	1186	1153	1668.47	2168	1170	0.539	-0.89	2.42837e-29	1.84881e-28	0	0.0028	0.0024	0.0024	TRUE	NA
MGG_17743	2254	2028	3321	3753	2194	2015	3645	3494	2836.9	2104	3570	1.696	0.762	2.83015e-29	2.15321e-28	0.0015	0.0018	0.0018	0.0018	TRUE	NA
MGG_07369	10971	10924	7105	8234	10677	10853	7798	7666	9248.63	10765	7732	0.718	-0.478	3.0463e-29	2.31607e-28	0	0.0009	0.0008	0.0008	TRUE	NA
MGG_02655	4688	4313	6051	7119	4562	4285	6641	6628	5529.18	4424	6634	1.5	0.585	3.53984e-29	2.68945e-28	0.0006	0.0012	0.0011	0.0011	TRUE	NA
MGG_00834	57	95	1226	1283	55	94	1346	1195	672.49	74	1270	16.957	4.084	3.71774e-29	2.82267e-28	0.0568	0.0062	0.0078	0.0568	TRUE	NA
MGG_00018	714	590	1315	1581	695	586	1443	1472	1049.07	640	1458	2.275	1.186	4.73427e-29	3.592e-28	0.005	0.0041	0.0043	0.0043	TRUE	NA
MGG_06371	9816	9765	6151	7430	9553	9702	6751	6918	8230.84	9628	6834	0.71	-0.494	4.77213e-29	3.61823e-28	0	0.001	0.0008	0.0008	TRUE	NA
MGG_00947	8465	8077	5213	6007	8238	8025	5721	5593	6894.28	8132	5657	0.696	-0.524	4.84535e-29	3.67124e-28	0.0002	0.0011	0.0009	0.0009	TRUE	NA
MGG_02467	4126	3997	2314	2674	4015	3971	2540	2490	3253.97	3993	2515	0.63	-0.668	4.85229e-29	3.67397e-28	0	0.0017	0.0014	0.0014	TRUE	NA
MGG_13801	8185	7554	4813	5603	7966	7505	5282	5217	6492.47	7736	5250	0.679	-0.559	5.01762e-29	3.79655e-28	0.0008	0.0011	0.001	0.001	TRUE	NA
MGG_01689	3793	3848	2148	2394	3691	3823	2357	2229	3025.22	3757	2293	0.61	-0.713	5.30898e-29	4.01426e-28	0.0007	0.0018	0.0016	0.0016	TRUE	NA
MGG_00914	31	18	256	284	30	18	281	264	148.36	24	272	11.327	3.502	5.56992e-29	4.20868e-28	0	0.0263	0.0249	0.0249	TRUE	NA
MGG_00537	13212	12905	8647	9872	12858	12821	9490	9191	11090.3	12840	9340	0.727	-0.459	6.70959e-29	5.06636e-28	0.0001	0.0008	0.0007	0.0007	TRUE	NA
MGG_06133	19575	19112	22970	26581	19051	18988	25210	24749	21999.3	19020	24980	1.313	0.393	7.17247e-29	5.41218e-28	0	0.0007	0.0006	0.0006	TRUE	NA
MGG_04757	134	108	443	562	130	107	486	523	311.79	118	504	4.247	2.086	7.23523e-29	5.45581e-28	0.0021	0.0128	0.0117	0.0117	TRUE	NA
MGG_07666	602	663	1312	1452	586	659	1440	1352	1009.1	622	1396	2.243	1.165	8.45708e-29	6.37281e-28	0.0028	0.0043	0.0041	0.0041	TRUE	NA
MGG_11610	45	46	278	359	44	46	305	334	182.21	45	320	7.149	2.838	8.73618e-29	6.57864e-28	0	0.0215	0.0186	0.0186	TRUE	NA
MGG_05179	2909	2724	4251	4634	2831	2706	4665	4315	3629.37	2768	4490	1.621	0.697	8.80577e-29	6.62652e-28	0.0018	0.0016	0.0016	0.0016	TRUE	NA
MGG_05368	118	68	498	500	115	68	547	466	298.62	92	506	5.539	2.47	9.29709e-29	6.99149e-28	0.0607	0.0133	0.0173	0.0173	TRUE	NA
MGG_07933	2528	2327	1218	1373	2460	2312	1337	1278	1846.83	2386	1308	0.548	-0.869	9.96853e-29	7.49132e-28	0.001	0.0026	0.0023	0.0023	TRUE	NA
MGG_02124	767	840	242	291	746	835	266	271	529.39	790	268	0.339	-1.559	1.22658e-28	9.21145e-28	0	0.0077	0.007	0.007	TRUE	NA
MGG_05369	603	653	1218	1506	587	649	1337	1402	993.64	618	1370	2.218	1.149	1.25006e-28	9.38142e-28	0.0014	0.0044	0.004	0.004	TRUE	NA
MGG_06191	4280	4288	5649	6665	4165	4260	6200	6206	5207.73	4212	6203	1.472	0.558	1.52558e-28	1.14414e-27	0	0.0012	0.001	0.001	TRUE	NA
MGG_11343	1930	1837	895	981	1878	1825	982	913	1399.76	1852	948	0.511	-0.967	1.55015e-28	1.16177e-27	0	0.0032	0.0029	0.0029	TRUE	NA
MGG_10720	3178	3217	1739	1988	3093	3196	1909	1851	2512.14	3144	1880	0.598	-0.743	1.62144e-28	1.21438e-27	0	0.002	0.0017	0.0017	TRUE	NA
MGG_02000	4300	4262	2386	2927	4185	4234	2619	2725	3440.77	4210	2672	0.635	-0.655	1.79793e-28	1.34565e-27	0	0.0016	0.0014	0.0014	TRUE	NA
MGG_03412	273	256	694	806	266	254	762	750	508.03	260	756	2.907	1.54	1.84933e-28	1.38318e-27	0	0.008	0.0067	0.0067	TRUE	NA
MGG_06240	88	63	368	432	86	63	404	402	238.58	74	403	5.434	2.442	2.08837e-28	1.56091e-27	0	0.0166	0.0156	0.0156	TRUE	NA
MGG_07479	4503	4398	2474	3068	4382	4370	2715	2857	3580.91	4376	2786	0.637	-0.651	2.1199e-28	1.5834e-27	0.0002	0.0016	0.0014	0.0014	TRUE	NA
MGG_11185	4453	4153	2470	2773	4334	4126	2711	2582	3438.12	4230	2646	0.625	-0.677	2.59579e-28	1.93754e-27	0.0009	0.0016	0.0015	0.0015	TRUE	NA
MGG_08498	292	303	36	31	284	301	40	29	163.4	292	34	0.116	-3.108	2.73002e-28	2.03636e-27	0	0.0239	0.0216	0.0216	TRUE	NA
MGG_04733	0	4	590	548	0	4	648	510	290.43	2	579	293.974	8.2	2.89838e-28	2.16048e-27	0.0331	0.0137	0.015	0.015	TRUE	NA
MGG_01378	3289	3296	1646	2128	3201	3275	1806	1981	2565.84	3238	1894	0.585	-0.772	2.99684e-28	2.23237e-27	0.0014	0.002	0.0019	0.0019	TRUE	NA
MGG_04966	3909	3972	2219	2605	3804	3946	2435	2425	3152.84	3875	2430	0.627	-0.673	3.00382e-28	2.23607e-27	0	0.0017	0.0015	0.0015	TRUE	NA
MGG_11165	2198	2223	1100	1254	2139	2209	1207	1168	1680.63	2174	1188	0.546	-0.873	3.04472e-28	2.26498e-27	0	0.0028	0.0024	0.0024	TRUE	NA
MGG_05915	5794	5493	3385	3957	5639	5457	3715	3684	4623.87	5548	3700	0.667	-0.585	3.07857e-28	2.28862e-27	0	0.0013	0.0011	0.0011	TRUE	NA
MGG_02941	2289	2366	3366	3987	2228	2351	3694	3712	2996.18	2290	3703	1.618	0.694	3.15369e-28	2.34289e-27	0.0002	0.0018	0.0016	0.0016	TRUE	NA
MGG_02651	2331	2439	1197	1351	2269	2423	1314	1258	1815.84	2346	1286	0.548	-0.868	3.38159e-28	2.51051e-27	0.0011	0.0026	0.0024	0.0024	TRUE	NA
MGG_07466	9549	9510	6031	7248	9293	9448	6619	6748	8027.25	9370	6684	0.713	-0.487	3.6942e-28	2.74076e-27	0	0.001	0.0008	0.0008	TRUE	NA
MGG_08854	621	640	1189	1518	604	636	1305	1413	989.63	620	1359	2.193	1.133	4.47913e-28	3.32087e-27	0	0.0044	0.0039	0.0039	TRUE	NA
MGG_03048	6050	5950	7574	8950	5888	5911	8312	8333	7111.23	5900	8322	1.411	0.496	4.60546e-28	3.41224e-27	0	0.001	0.0008	0.0008	TRUE	NA
MGG_07957	550	547	128	161	535	543	140	150	342.28	539	145	0.269	-1.892	4.81575e-28	3.56566e-27	0	0.0117	0.0099	0.0099	TRUE	NA
MGG_06379	1252	1265	474	612	1218	1257	520	570	891.32	1238	545	0.441	-1.182	4.83583e-28	3.57812e-27	0	0.0048	0.0042	0.0042	TRUE	NA
MGG_01579	7080	7145	8837	10670	6890	7099	9699	9934	8405.54	6994	9816	1.404	0.489	4.86874e-28	3.60007e-27	0.0002	0.001	0.0008	0.0008	TRUE	NA
MGG_06902	6142	6166	7724	9502	5977	6126	8477	8847	7356.91	6052	8662	1.432	0.518	4.88644e-28	3.61073e-27	0.0005	0.001	0.0009	0.0009	TRUE	NA
MGG_07872	103	103	386	521	100	102	424	485	277.82	101	454	4.49	2.167	5.28396e-28	3.90187e-27	0	0.0143	0.0128	0.0128	TRUE	NA
MGG_06039	833	836	265	330	811	831	291	307	559.84	821	299	0.365	-1.455	6.82237e-28	5.03451e-27	0	0.0073	0.0062	0.0062	TRUE	NA
MGG_00729	3925	3794	2114	2603	3820	3769	2320	2424	3083.24	3794	2372	0.625	-0.677	6.8628e-28	5.06097e-27	0	0.0017	0.0015	0.0015	TRUE	NA
MGG_04099	717	663	193	240	698	659	212	223	447.94	678	218	0.321	-1.639	7.94307e-28	5.85371e-27	0	0.009	0.0077	0.0077	TRUE	NA
MGG_10160	1706	1616	744	888	1660	1606	817	827	1227.29	1633	822	0.503	-0.991	9.09932e-28	6.70135e-27	0	0.0036	0.003	0.003	TRUE	NA
MGG_10665	849	921	299	336	826	915	328	313	595.57	870	320	0.368	-1.443	9.53328e-28	7.01626e-27	0	0.0069	0.0062	0.0062	TRUE	NA
MGG_13481	1489	1436	2338	2646	1449	1427	2566	2464	1976.34	1438	2515	1.748	0.806	9.65596e-28	7.10182e-27	0	0.0024	0.0021	0.0021	TRUE	NA
MGG_12849	3670	3469	5104	5620	3572	3447	5602	5233	4463.12	3510	5418	1.543	0.626	9.99257e-28	7.3445e-27	0.0013	0.0014	0.0013	0.0013	TRUE	NA
MGG_08007	79	129	528	516	77	128	579	480	316.24	102	530	5.17	2.37	1.10195e-27	8.09393e-27	0.0596	0.0126	0.0169	0.0169	TRUE	NA
MGG_09235	4518	4276	2545	2978	4397	4248	2793	2773	3552.78	4322	2783	0.644	-0.635	1.19269e-27	8.7546e-27	0	0.0016	0.0013	0.0013	TRUE	NA
MGG_09261	46179	43644	31223	36299	44942	43361	34267	33797	39091.8	44152	34032	0.771	-0.376	1.45854e-27	1.06989e-26	0.0003	0.0006	0.0005	0.0005	TRUE	NA
MGG_07278	10926	10759	6868	8403	10633	10689	7538	7824	9171.01	10661	7681	0.721	-0.473	1.61917e-27	1.18693e-26	0.0001	0.0009	0.0008	0.0008	TRUE	NA
MGG_09259	1317	1348	2102	2529	1282	1339	2307	2355	1820.65	1310	2331	1.779	0.831	1.69265e-27	1.23997e-26	0	0.0026	0.0022	0.0022	TRUE	NA
MGG_02668	2993	2966	1579	1906	2913	2947	1733	1775	2341.8	2930	1754	0.599	-0.74	1.73439e-27	1.2697e-26	0	0.0021	0.0018	0.0018	TRUE	NA
MGG_06738	30	40	284	289	29	40	312	269	162.43	34	290	8.425	3.075	1.79719e-27	1.31481e-26	0	0.0241	0.0225	0.0225	TRUE	NA
MGG_00539	108540	107671	76914	91096	105633	106973	84413	84816	95459	106303	84614	0.796	-0.329	1.88663e-27	1.37933e-26	0	0.0005	0.0004	0.0004	TRUE	NA
MGG_05345	5838	5560	3447	3732	5682	5524	3783	3475	4615.86	5603	3629	0.647	-0.627	2.06772e-27	1.51072e-26	0.0015	0.0013	0.0014	0.0014	TRUE	NA
MGG_05480	9974	9582	6243	7483	9707	9520	6852	6967	8261.41	9614	6910	0.719	-0.476	2.3148e-27	1.69013e-26	0	0.001	0.0008	0.0008	TRUE	NA
MGG_06429	1158	1077	404	520	1127	1070	443	484	781.14	1098	464	0.423	-1.242	2.73724e-27	1.99725e-26	0	0.0054	0.0048	0.0048	TRUE	NA
MGG_07008	3049	3124	1680	1918	2967	3104	1844	1786	2425.17	3036	1815	0.598	-0.743	2.74135e-27	1.99892e-26	0	0.0021	0.0018	0.0018	TRUE	NA
MGG_04425	3330	3139	1777	2053	3241	3119	1950	1911	2555.3	3180	1930	0.607	-0.72	2.8061e-27	2.04479e-26	0	0.002	0.0017	0.0017	TRUE	NA
MGG_11519	754	742	230	279	734	737	252	260	495.8	736	256	0.348	-1.521	2.8719e-27	2.09135e-26	0	0.0082	0.0069	0.0069	TRUE	NA
MGG_10268	1343	1216	2043	2506	1307	1208	2242	2333	1772.65	1258	2288	1.819	0.863	2.95673e-27	2.15171e-26	0.0011	0.0027	0.0025	0.0025	TRUE	NA
MGG_01057	4131	3957	2253	2763	4020	3931	2473	2573	3249.23	3976	2523	0.635	-0.656	3.32332e-27	2.4169e-26	0	0.0017	0.0014	0.0014	TRUE	NA
MGG_16462	12525	11846	8001	9322	12189	11769	8781	8679	10354.8	11979	8730	0.729	-0.457	3.67176e-27	2.66855e-26	0.0003	0.0009	0.0008	0.0008	TRUE	NA
MGG_04872	1868	1775	835	1023	1818	1764	916	952	1362.59	1791	934	0.522	-0.938	3.68943e-27	2.67962e-26	0	0.0033	0.0028	0.0028	TRUE	NA
MGG_08582	1477	1573	2379	2833	1437	1563	2611	2638	2062.23	1500	2624	1.75	0.807	4.10523e-27	2.97967e-26	0.001	0.0024	0.0022	0.0022	TRUE	NA
MGG_14683	567	579	1113	1338	552	575	1222	1246	898.59	564	1234	2.19	1.131	4.25455e-27	3.08602e-26	0	0.0048	0.004	0.004	TRUE	NA
MGG_12178	16	21	246	230	16	21	270	214	130.14	18	242	13.284	3.732	5.39888e-27	3.91348e-26	0	0.0299	0.0287	0.0287	TRUE	NA
MGG_11278	4162	3836	2209	2678	4051	3811	2424	2493	3194.86	3931	2458	0.626	-0.677	5.5164e-27	3.99605e-26	0.0009	0.0017	0.0016	0.0016	TRUE	NA
MGG_10441	773	684	220	257	752	680	241	239	478.15	716	240	0.336	-1.575	5.77118e-27	4.17786e-26	0	0.0085	0.0075	0.0075	TRUE	NA
MGG_03008	6779	6322	8349	9717	6597	6281	9163	9047	7772.17	6439	9105	1.414	0.5	6.13235e-27	4.43642e-26	0.0004	0.001	0.0009	0.0009	TRUE	NA
MGG_01260	449	460	947	1137	437	457	1039	1059	747.99	447	1049	2.347	1.231	6.26814e-27	4.53168e-26	0	0.0056	0.0047	0.0047	TRUE	NA
MGG_04876	4442	3919	2288	2684	4323	3894	2511	2499	3306.67	4108	2505	0.61	-0.714	6.47857e-27	4.68075e-26	0.0026	0.0017	0.0018	0.0018	TRUE	NA
MGG_01478	2020	1944	2897	3397	1966	1931	3179	3163	2559.9	1948	3171	1.627	0.702	6.76549e-27	4.88486e-26	0	0.002	0.0016	0.0016	TRUE	NA
MGG_01746	16418	16070	10916	12994	15978	15966	11980	12098	14005.7	15972	12039	0.754	-0.408	7.06495e-27	5.09774e-26	0	0.0008	0.0006	0.0006	TRUE	NA
MGG_04853	33313	33197	37824	45548	32421	32982	41512	42408	37330.7	32702	41960	1.283	0.36	7.63583e-27	5.50607e-26	0.0001	0.0006	0.0005	0.0005	TRUE	NA
MGG_01235	3229	3162	4268	5193	3143	3142	4684	4835	3950.8	3142	4760	1.515	0.599	7.77644e-27	5.6038e-26	0	0.0015	0.0012	0.0012	TRUE	NA
MGG_06682	366	388	68	71	356	385	75	66	220.6	370	70	0.189	-2.401	7.81951e-27	5.63117e-26	0	0.0179	0.0156	0.0156	TRUE	NA
MGG_05058	24400	22635	29981	32955	23746	22488	32904	30683	27455.6	23117	31794	1.375	0.46	1.13288e-26	8.15304e-26	0.0019	0.0006	0.0009	0.0009	TRUE	NA
MGG_07464	424	388	899	1029	413	385	987	958	685.71	399	972	2.436	1.284	1.34471e-26	9.67122e-26	0	0.0061	0.0052	0.0052	TRUE	NA
MGG_01463	3177	3076	4313	4933	3092	3056	4734	4593	3868.61	3074	4664	1.517	0.601	1.43097e-26	1.0285e-25	0	0.0015	0.0013	0.0013	TRUE	NA
MGG_15036	2548	2605	1304	1603	2480	2588	1431	1492	1997.88	2534	1462	0.577	-0.793	1.51969e-26	1.09155e-25	0	0.0024	0.0021	0.0021	TRUE	NA
MGG_00625	1088	1110	429	504	1059	1103	471	469	775.44	1081	470	0.435	-1.201	1.58578e-26	1.13828e-25	0	0.0054	0.0046	0.0046	TRUE	NA
MGG_02083	6	5	203	247	6	5	223	230	115.89	6	226	41.873	5.388	1.58962e-26	1.1403e-25	0	0.0336	0.0296	0.0296	TRUE	NA
MGG_13261	538	546	134	164	524	542	147	153	341.45	533	150	0.281	-1.829	1.67924e-26	1.2038e-25	0	0.0117	0.0099	0.0099	TRUE	NA
MGG_09276	103	98	420	437	100	97	461	407	266.36	98	434	4.388	2.134	1.8306e-26	1.31145e-25	0	0.0149	0.0132	0.0132	TRUE	NA
MGG_12184	2642	2568	1394	1509	2571	2551	1530	1405	2014.37	2561	1468	0.572	-0.805	1.92982e-26	1.38164e-25	0.001	0.0024	0.0022	0.0022	TRUE	NA
MGG_09237	15916	14438	9678	10353	15490	14344	10622	9639	12523.8	14917	10130	0.679	-0.559	2.10735e-26	1.50777e-25	0.0037	0.0008	0.0012	0.0012	TRUE	NA
MGG_05248	17680	18071	11473	14181	17206	17954	12592	13203	15238.9	17580	12898	0.734	-0.447	2.31982e-26	1.65871e-25	0.0009	0.0007	0.0008	0.0008	TRUE	NA
MGG_13269	563	446	93	135	548	443	102	126	304.7	496	114	0.231	-2.117	2.32669e-26	1.66255e-25	0.0176	0.0131	0.0137	0.0137	TRUE	NA
MGG_13935	977	916	1608	1894	951	910	1765	1763	1347.28	930	1764	1.896	0.923	2.39552e-26	1.71062e-25	0	0.0033	0.0028	0.0028	TRUE	NA
MGG_03913	6	8	196	229	6	8	215	213	110.53	7	214	31.105	4.959	2.41201e-26	1.72128e-25	0	0.0352	0.031	0.031	TRUE	NA
MGG_06082	6799	6613	4167	4968	6617	6570	4573	4626	5596.47	6594	4600	0.698	-0.519	2.43165e-26	1.73418e-25	0	0.0012	0.001	0.001	TRUE	NA
MGG_01572	1699	1668	798	896	1653	1657	876	834	1255.18	1655	855	0.516	-0.954	2.8499e-26	2.03115e-25	0	0.0035	0.003	0.003	TRUE	NA
MGG_06219	87	81	341	441	85	80	374	411	237.5	82	392	4.755	2.249	2.94332e-26	2.09638e-25	0	0.0166	0.0144	0.0144	TRUE	NA
MGG_05692	311	262	724	834	303	260	795	777	533.52	282	786	2.79	1.48	3.05124e-26	2.17184e-25	0.0003	0.0077	0.007	0.007	TRUE	NA
MGG_13276	163	172	522	588	159	171	573	547	362.47	165	560	3.399	1.765	3.06994e-26	2.18375e-25	0	0.0111	0.0094	0.0094	TRUE	NA
MGG_04768	17455	17171	20329	23595	16987	17060	22311	21968	19581.7	17024	22140	1.3	0.379	3.44168e-26	2.44661e-25	0	0.0007	0.0006	0.0006	TRUE	NA
MGG_07762	199	170	518	712	194	169	569	663	398.5	182	616	3.399	1.765	3.50984e-26	2.49345e-25	0.008	0.0101	0.0098	0.0098	TRUE	NA
MGG_15528	914	840	309	355	890	835	339	331	598.43	862	335	0.388	-1.365	3.62985e-26	2.57705e-25	0	0.0069	0.0059	0.0059	TRUE	NA
MGG_02767	3587	3761	4907	5947	3491	3737	5385	5537	4537.51	3614	5461	1.512	0.596	4.05454e-26	2.87672e-25	0.0009	0.0013	0.0013	0.0013	TRUE	NA
MGG_08975	5928	5711	3606	4142	5769	5674	3958	3856	4814.32	5722	3907	0.683	-0.551	4.10134e-26	2.90806e-25	0	0.0013	0.0011	0.0011	TRUE	NA
MGG_15617	5	1	281	317	5	1	308	295	152.35	3	302	102.325	6.677	4.15033e-26	2.9409e-25	0	0.0256	0.0233	0.0233	TRUE	NA
MGG_05367	656	711	1269	1522	638	706	1393	1417	1038.66	672	1405	2.09	1.063	4.18579e-26	2.96413e-25	0.0006	0.0042	0.0038	0.0038	TRUE	NA
MGG_17514	1792	1785	868	923	1744	1773	953	859	1332.36	1758	906	0.515	-0.959	4.39851e-26	3.11277e-25	0.0013	0.0034	0.0031	0.0031	TRUE	NA
MGG_15496	613	512	1138	1340	597	509	1249	1248	900.46	553	1248	2.258	1.175	4.83798e-26	3.42159e-25	0.0037	0.0048	0.0047	0.0047	TRUE	NA
MGG_10115	3252	3277	4361	5204	3165	3256	4786	4845	4013.03	3210	4816	1.5	0.585	4.89502e-26	3.45971e-25	0	0.0015	0.0012	0.0012	TRUE	NA
MGG_09521	730	700	1332	1501	710	695	1462	1398	1066.33	702	1430	2.033	1.024	5.22548e-26	3.69091e-25	0	0.0041	0.0035	0.0035	TRUE	NA
MGG_01452	7554	7342	9091	10782	7352	7294	9977	10039	8665.56	7323	10008	1.367	0.451	5.59556e-26	3.94979e-25	0	0.0009	0.0008	0.0008	TRUE	NA
MGG_14609	324	376	55	32	315	374	60	30	194.76	344	45	0.129	-2.953	5.7512e-26	4.05705e-25	0.097	0.0202	0.0249	0.0249	TRUE	NA
MGG_06378	2708	2852	1412	1747	2635	2834	1550	1627	2161.31	2734	1588	0.581	-0.783	5.78879e-26	4.08096e-25	0.0015	0.0023	0.0022	0.0022	TRUE	NA
MGG_01058	3679	3796	2060	2518	3580	3771	2261	2344	2989.29	3676	2302	0.627	-0.674	5.80172e-26	4.08748e-25	0.0007	0.0018	0.0016	0.0016	TRUE	NA
MGG_16233	98	65	387	421	95	65	425	392	244.17	80	408	5.099	2.35	6.44031e-26	4.53449e-25	0.0213	0.0162	0.0166	0.0166	TRUE	NA
MGG_04938	237	256	633	759	231	254	695	707	471.6	242	701	2.89	1.531	6.57815e-26	4.62859e-25	0	0.0086	0.0074	0.0074	TRUE	NA
MGG_05143	812	850	1460	1717	790	844	1602	1599	1208.93	817	1600	1.958	0.97	6.59364e-26	4.63359e-25	0	0.0037	0.0032	0.0032	TRUE	NA
MGG_06707	611	701	1306	1474	595	696	1433	1372	1024.21	646	1402	2.173	1.12	6.59358e-26	4.63359e-25	0.0044	0.0042	0.0043	0.0043	TRUE	NA
MGG_15866	1371	1425	2183	2564	1334	1416	2396	2387	1883.29	1375	2392	1.739	0.799	6.6103e-26	4.64234e-25	0	0.0025	0.0022	0.0022	TRUE	NA
MGG_13324	791	718	1355	1608	770	713	1487	1497	1116.86	742	1492	2.012	1.009	7.39313e-26	5.18881e-25	0	0.0039	0.0034	0.0034	TRUE	NA
MGG_05125	80	73	329	407	78	73	361	379	222.6	76	370	4.922	2.299	7.67832e-26	5.38555e-25	0	0.0177	0.0151	0.0151	TRUE	NA
MGG_09384	105	96	362	508	102	95	397	473	266.96	98	435	4.409	2.14	8.3642e-26	5.8629e-25	0	0.0148	0.0138	0.0138	TRUE	NA
MGG_04910	601	596	153	205	585	592	168	191	383.96	588	180	0.305	-1.711	8.71336e-26	6.10377e-25	0	0.0105	0.0091	0.0091	TRUE	NA
MGG_12020	237	244	23	18	231	242	25	17	128.77	236	21	0.088	-3.509	9.4119e-26	6.58893e-25	0	0.0303	0.0274	0.0274	TRUE	NA
MGG_07525	1381	1278	504	681	1344	1270	553	634	950.23	1307	594	0.455	-1.136	9.53245e-26	6.66909e-25	0.0036	0.0045	0.0044	0.0044	TRUE	NA
MGG_03041	4204	4261	5452	6598	4091	4233	5984	6143	5112.89	4162	6064	1.457	0.543	1.04542e-25	7.30932e-25	0.0002	0.0012	0.0011	0.0011	TRUE	NA
MGG_03325	56	53	282	348	54	53	309	324	185.17	54	316	5.913	2.564	1.11451e-25	7.78747e-25	0	0.0212	0.018	0.018	TRUE	NA
MGG_02920	1022	1053	1711	2025	995	1046	1878	1885	1451.01	1020	1882	1.844	0.883	1.16064e-25	8.10469e-25	0	0.0031	0.0027	0.0027	TRUE	NA
MGG_03347	2939	3091	4169	4893	2860	3071	4575	4556	3765.61	2966	4566	1.54	0.623	1.18155e-25	8.24544e-25	0.0007	0.0015	0.0014	0.0014	TRUE	NA
MGG_02633	1448	1400	618	754	1409	1391	678	702	1045.11	1400	690	0.493	-1.02	1.24649e-25	8.69317e-25	0	0.0042	0.0035	0.0035	TRUE	NA
MGG_14956	1099	1000	347	485	1070	994	381	452	723.87	1032	416	0.404	-1.307	1.27161e-25	8.86278e-25	0.0059	0.0058	0.0058	0.0058	TRUE	NA
MGG_08552	610	686	185	216	594	682	203	201	419.84	638	202	0.317	-1.658	1.39133e-25	9.69104e-25	0	0.0096	0.0088	0.0088	TRUE	NA
MGG_10413	1077	1016	404	482	1048	1009	443	449	737.43	1028	446	0.434	-1.205	1.4251e-25	9.92e-25	0	0.0057	0.0048	0.0048	TRUE	NA
MGG_01859	1336	1150	509	518	1300	1143	559	482	870.92	1222	520	0.425	-1.233	1.58358e-25	1.10162e-24	0.0081	0.0049	0.0053	0.0053	TRUE	NA
MGG_08949	78	97	407	406	76	96	447	378	249.24	86	412	4.785	2.258	1.61619e-25	1.1236e-24	0.0129	0.0159	0.0155	0.0155	TRUE	NA
MGG_13875	942	958	289	422	917	952	317	393	644.66	934	355	0.381	-1.392	1.72399e-25	1.19779e-24	0.0078	0.0064	0.0066	0.0066	TRUE	NA
MGG_12805	8123	7754	5119	5857	7905	7704	5618	5453	6670.14	7804	5536	0.709	-0.496	1.91151e-25	1.32724e-24	0.0002	0.0011	0.0009	0.0009	TRUE	NA
MGG_15188	4	1	347	327	4	1	381	304	172.54	2	342	139.29	7.122	1.92262e-25	1.33412e-24	0	0.0227	0.0227	0.0227	TRUE	NA
MGG_14162	1457	1431	654	751	1418	1422	718	699	1064.17	1420	708	0.499	-1.003	2.23912e-25	1.55276e-24	0	0.0041	0.0034	0.0034	TRUE	NA
MGG_01096	13866	13055	16473	18713	13495	12970	18079	17423	15491.8	13232	17751	1.341	0.424	2.3039e-25	1.59669e-24	0.0006	0.0007	0.0007	0.0007	TRUE	NA
MGG_13800	743	661	221	248	723	657	243	231	463.32	690	237	0.343	-1.544	2.41757e-25	1.67442e-24	0	0.0088	0.0077	0.0077	TRUE	NA
MGG_05650	879	835	1519	1702	855	830	1667	1585	1234.21	842	1626	1.929	0.948	2.71783e-25	1.8812e-24	0	0.0036	0.0031	0.0031	TRUE	NA
MGG_06148	3021	3210	1654	1999	2940	3189	1815	1861	2451.44	3064	1838	0.6	-0.737	2.7205e-25	1.88186e-24	0.0016	0.0021	0.002	0.002	TRUE	NA
MGG_06174	2667	2687	1362	1718	2596	2670	1495	1600	2089.88	2633	1548	0.588	-0.766	2.80878e-25	1.94172e-24	0.0006	0.0023	0.0021	0.0021	TRUE	NA
MGG_04995	1805	1611	771	936	1757	1601	846	871	1268.72	1679	858	0.512	-0.966	2.84332e-25	1.96436e-24	0.002	0.0035	0.0033	0.0033	TRUE	NA
MGG_04242	32101	31547	36566	42242	31241	31343	40131	39330	35511.3	31292	39730	1.27	0.344	2.98332e-25	2.0598e-24	0	0.0006	0.0005	0.0005	TRUE	NA
MGG_09952	13584	13169	9044	10144	13220	13084	9926	9445	11418.6	13152	9686	0.736	-0.442	3.1269e-25	2.15758e-24	0.0005	0.0008	0.0008	0.0008	TRUE	NA
MGG_01285	7675	7707	4854	5827	7469	7657	5327	5425	6469.77	7563	5376	0.711	-0.492	3.31272e-25	2.28437e-24	0	0.0011	0.0009	0.0009	TRUE	NA
MGG_17426	447	461	903	1199	435	458	991	1116	750.11	446	1054	2.362	1.24	3.33765e-25	2.30012e-24	0.0035	0.0056	0.0053	0.0053	TRUE	NA
MGG_16901	3988	4063	2308	2778	3881	4037	2533	2587	3259.35	3959	2560	0.647	-0.629	3.68949e-25	2.54101e-24	0	0.0017	0.0014	0.0014	TRUE	NA
MGG_06672	3564	3856	5010	6200	3469	3831	5498	5773	4642.66	3650	5636	1.545	0.627	3.69884e-25	2.54587e-24	0.0026	0.0013	0.0015	0.0015	TRUE	NA
MGG_01707	1097	981	1726	2043	1068	975	1894	1902	1459.68	1022	1898	1.859	0.894	3.89222e-25	2.6773e-24	0.0008	0.0031	0.0028	0.0028	TRUE	NA
MGG_04560	1492	1476	2296	2611	1452	1466	2520	2431	1967.34	1459	2476	1.696	0.762	4.11696e-25	2.83012e-24	0	0.0024	0.0021	0.0021	TRUE	NA
MGG_17829	1161	999	410	483	1130	993	450	450	755.53	1062	450	0.424	-1.238	4.25197e-25	2.92111e-24	0.0038	0.0056	0.0053	0.0053	TRUE	NA
MGG_03757	969	848	1671	1812	943	843	1834	1687	1326.64	893	1760	1.971	0.979	4.34892e-25	2.98586e-24	0.0039	0.0034	0.0035	0.0035	TRUE	NA
MGG_04258	33	49	254	326	32	49	279	304	165.77	40	292	7.218	2.852	4.36495e-25	2.995e-24	0.004	0.0236	0.0226	0.0226	TRUE	NA
MGG_05082	3402	3237	4445	5178	3311	3216	4878	4821	4056.59	3264	4850	1.486	0.571	4.59823e-25	3.15311e-24	0	0.0014	0.0012	0.0012	TRUE	NA
MGG_06503	4195	3814	2309	2572	4083	3789	2534	2395	3200.19	3936	2464	0.626	-0.676	4.9093e-25	3.36434e-24	0.0019	0.0017	0.0017	0.0017	TRUE	NA
MGG_11889	3581	3463	1976	2399	3485	3441	2169	2234	2831.98	3463	2202	0.636	-0.653	5.27113e-25	3.61005e-24	0	0.0018	0.0016	0.0016	TRUE	NA
MGG_05623	970	902	1554	1883	944	896	1706	1753	1324.72	920	1730	1.88	0.911	5.32053e-25	3.64163e-24	0	0.0034	0.0029	0.0029	TRUE	NA
MGG_00345	3203	3312	1838	2035	3117	3291	2017	1895	2579.92	3204	1956	0.61	-0.713	5.71969e-25	3.91241e-24	0.0013	0.002	0.0019	0.0019	TRUE	NA
MGG_04827	15233	14798	10278	11720	14825	14702	11280	10912	12929.8	14764	11096	0.751	-0.412	6.06261e-25	4.14441e-24	0.0001	0.0008	0.0007	0.0007	TRUE	NA
MGG_12606	39079	39399	44404	54415	38032	39144	48734	50664	44143.4	38588	49699	1.288	0.365	6.24776e-25	4.26834e-24	0.0005	0.0006	0.0006	0.0006	TRUE	NA
MGG_14071	1736	1600	2461	2986	1689	1590	2701	2780	2190.06	1640	2740	1.672	0.741	6.84536e-25	4.67372e-24	0.0005	0.0022	0.002	0.002	TRUE	NA
MGG_02520	3850	3938	5095	6013	3747	3912	5592	5598	4712.41	3830	5595	1.461	0.547	7.26343e-25	4.95609e-24	0.0002	0.0013	0.0011	0.0011	TRUE	NA
MGG_08206	625	728	197	232	608	723	216	216	440.94	666	216	0.325	-1.623	7.82898e-25	5.33869e-24	0.0072	0.0092	0.0089	0.0089	TRUE	NA
MGG_08810	6729	6663	4236	4994	6549	6620	4649	4650	5616.84	6584	4650	0.706	-0.502	8.21789e-25	5.60043e-24	0	0.0012	0.001	0.001	TRUE	NA
MGG_04944	8811	8577	10365	12795	8575	8521	11376	11913	10096.3	8548	11644	1.362	0.446	8.90451e-25	6.06462e-24	0.0003	0.0009	0.0008	0.0008	TRUE	NA
MGG_04445	2870	2833	1529	1869	2793	2815	1678	1740	2256.5	2804	1709	0.61	-0.714	9.2385e-25	6.28822e-24	0	0.0022	0.0018	0.0018	TRUE	NA
MGG_04555	6067	6258	7751	9105	5904	6217	8507	8477	7276.51	6060	8492	1.401	0.487	9.38087e-25	6.38118e-24	0.0004	0.001	0.0009	0.0009	TRUE	NA
MGG_16432	236	203	566	732	230	202	621	682	433.52	216	652	3.021	1.595	9.49934e-25	6.4578e-24	0.0032	0.0093	0.0085	0.0085	TRUE	NA
MGG_13803	1118	1149	398	556	1088	1142	437	518	796.02	1115	478	0.429	-1.221	9.64632e-25	6.55368e-24	0.0048	0.0053	0.0053	0.0053	TRUE	NA
MGG_13471	11146	9836	13662	15550	10847	9772	14994	14478	12523	10310	14736	1.429	0.515	9.95135e-25	6.75676e-24	0.0029	0.0008	0.0011	0.0011	TRUE	NA
MGG_03415	289	317	692	898	281	315	759	836	547.94	298	798	2.678	1.421	1.00422e-24	6.81423e-24	0.0032	0.0075	0.0069	0.0069	TRUE	NA
MGG_15612	1587	1265	4707	4847	1544	1257	5166	4513	3120.03	1400	4840	3.455	1.789	1.2097e-24	8.20351e-24	0.0142	0.0017	0.0033	0.0142	TRUE	NA
MGG_15675	1891	1896	2715	3235	1840	1884	2980	3012	2428.95	1862	2996	1.609	0.686	1.24791e-24	8.45743e-24	0	0.0021	0.0017	0.0017	TRUE	NA
MGG_02444	2637	2747	1310	1714	2566	2729	1438	1596	2082.29	2648	1517	0.573	-0.802	1.27467e-24	8.63354e-24	0.0026	0.0023	0.0024	0.0024	TRUE	NA
MGG_15861	18939	19023	12786	15468	18432	18900	14033	14402	16441.5	18666	14218	0.762	-0.393	1.39848e-24	9.4663e-24	0.0002	0.0007	0.0006	0.0006	TRUE	NA
MGG_16131	87	69	340	390	85	69	373	363	222.37	77	368	4.802	2.264	1.40203e-24	9.4845e-24	0	0.0177	0.0157	0.0157	TRUE	NA
MGG_08858	2470	2354	3293	4159	2404	2339	3614	3872	3057.24	2372	3743	1.579	0.659	1.53249e-24	1.03607e-23	0.0011	0.0017	0.0017	0.0017	TRUE	NA
MGG_01325	3639	3597	1952	2491	3542	3574	2142	2319	2894.21	3558	2230	0.627	-0.672	1.55897e-24	1.05333e-23	0.0009	0.0018	0.0017	0.0017	TRUE	NA
MGG_00772	1084	1308	440	532	1055	1300	483	495	833.18	1178	489	0.416	-1.267	1.68612e-24	1.13855e-23	0.0107	0.0051	0.0059	0.0059	TRUE	NA
MGG_08061	2633	2471	3659	4089	2562	2455	4016	3807	3210.09	2508	3912	1.559	0.64	1.87059e-24	1.26233e-23	0.0009	0.0017	0.0016	0.0016	TRUE	NA
MGG_06705	2530	2668	1387	1585	2462	2651	1522	1476	2027.73	2556	1499	0.586	-0.771	2.07084e-24	1.39662e-23	0.0013	0.0024	0.0022	0.0022	TRUE	NA
MGG_02453	1733	1710	833	978	1687	1699	914	911	1302.58	1693	912	0.539	-0.892	2.255e-24	1.51989e-23	0	0.0034	0.0028	0.0028	TRUE	NA
MGG_00343	8809	9095	5716	6804	8573	9036	6273	6335	7554.35	8804	6304	0.716	-0.482	2.30039e-24	1.54953e-23	0.0006	0.001	0.0009	0.0009	TRUE	NA
MGG_04059	3432	3227	1847	2242	3340	3206	2027	2087	2665.18	3273	2057	0.629	-0.67	2.53135e-24	1.70408e-23	0	0.0019	0.0017	0.0017	TRUE	NA
MGG_09337	19669	20251	13321	16063	19142	20120	14620	14956	17209.4	19631	14788	0.753	-0.409	2.68637e-24	1.80733e-23	0.0006	0.0007	0.0007	0.0007	TRUE	NA
MGG_04504	1557	1623	745	863	1515	1612	818	804	1187.23	1564	811	0.518	-0.948	2.71181e-24	1.82334e-23	0	0.0037	0.0032	0.0032	TRUE	NA
MGG_05436	2497	2415	1326	1514	2430	2399	1455	1410	1923.6	2414	1432	0.593	-0.754	2.74844e-24	1.84684e-23	0	0.0025	0.0021	0.0021	TRUE	NA
MGG_12982	6	3	183	245	6	3	201	228	109.44	4	214	48.526	5.601	2.98003e-24	2.00003e-23	0	0.0355	0.0325	0.0325	TRUE	NA
MGG_17276	1075	1146	366	533	1046	1139	402	496	770.68	1092	449	0.412	-1.279	2.97886e-24	2.00003e-23	0.0097	0.0055	0.006	0.006	TRUE	NA
MGG_06467	1528	1522	699	844	1487	1512	767	786	1138.05	1500	776	0.518	-0.949	3.09352e-24	2.07493e-23	0	0.0039	0.0032	0.0032	TRUE	NA
MGG_08342	578	560	169	173	563	556	185	161	366.36	560	173	0.309	-1.694	3.45325e-24	2.31481e-23	0	0.011	0.0096	0.0096	TRUE	NA
MGG_05631	9299	9459	6171	6967	9050	9398	6773	6487	7926.77	9224	6630	0.719	-0.477	3.52992e-24	2.36477e-23	0.0006	0.001	0.0009	0.0009	TRUE	NA
MGG_01490	79617	78124	57309	66154	77484	77618	62897	61594	69898.2	77551	62246	0.803	-0.317	4.55208e-24	3.04768e-23	0.0001	0.0006	0.0005	0.0005	TRUE	NA
MGG_01987	2505	2320	3396	3927	2438	2305	3727	3656	3031.57	2372	3692	1.556	0.638	4.56686e-24	3.05573e-23	0.0004	0.0018	0.0016	0.0016	TRUE	NA
MGG_00282	1178	1064	467	463	1146	1057	513	431	786.79	1102	472	0.427	-1.227	4.77691e-24	3.19434e-23	0.0068	0.0054	0.0055	0.0055	TRUE	NA
MGG_09715	2021	2020	1010	1223	1967	2007	1108	1139	1555.24	1987	1124	0.566	-0.822	4.79279e-24	3.20302e-23	0	0.003	0.0025	0.0025	TRUE	NA
MGG_03136	28308	27362	19503	23165	27550	27185	21405	21568	24426.8	27368	21486	0.785	-0.349	4.94085e-24	3.29998e-23	0	0.0007	0.0005	0.0005	TRUE	NA
MGG_17595	12633	11929	8136	9699	12295	11852	8929	9030	10526.5	12074	8980	0.744	-0.427	5.17869e-24	3.45673e-23	0.0003	0.0009	0.0008	0.0008	TRUE	NA
MGG_12956	2078	2046	1050	1250	2022	2033	1152	1164	1592.82	2028	1158	0.571	-0.808	5.28124e-24	3.52306e-23	0	0.0029	0.0024	0.0024	TRUE	NA
MGG_13220	654	772	1332	1600	636	767	1462	1490	1088.77	702	1476	2.104	1.073	5.29172e-24	3.52792e-23	0.0066	0.004	0.0044	0.0044	TRUE	NA
MGG_06539	297	264	653	819	289	262	717	763	507.64	276	740	2.684	1.424	5.43419e-24	3.62072e-23	0	0.008	0.0071	0.0071	TRUE	NA
MGG_07676	364	363	71	82	354	361	78	76	217.29	358	77	0.216	-2.213	7.30347e-24	4.86326e-23	0	0.0181	0.0153	0.0153	TRUE	NA
MGG_01123	1378	1372	636	688	1341	1363	698	641	1010.7	1352	670	0.495	-1.016	7.54386e-24	5.01728e-23	0	0.0043	0.0038	0.0038	TRUE	NA
MGG_02713	1830	2008	941	1019	1781	1995	1033	949	1439.37	1888	991	0.524	-0.931	7.54265e-24	5.01728e-23	0.0044	0.0032	0.0033	0.0033	TRUE	NA
MGG_00271	2197	2171	3066	3571	2138	2157	3365	3325	2746.22	2148	3345	1.557	0.639	7.66275e-24	5.09328e-23	0	0.0019	0.0016	0.0016	TRUE	NA
MGG_05132	1050	1066	1668	2077	1022	1059	1831	1934	1461.36	1040	1882	1.81	0.856	7.7031e-24	5.11702e-23	0	0.0031	0.0027	0.0027	TRUE	NA
MGG_07598	57	91	363	394	55	90	398	367	227.78	72	382	5.249	2.392	7.83249e-24	5.19985e-23	0.0427	0.0173	0.0191	0.0191	TRUE	NA
MGG_01292	1649	1604	774	923	1605	1594	849	859	1226.82	1600	854	0.534	-0.904	9.30559e-24	6.1741e-23	0	0.0036	0.003	0.003	TRUE	NA
MGG_06323	228	229	19	27	222	228	21	25	123.85	225	23	0.103	-3.282	9.42585e-24	6.25014e-23	0	0.0314	0.0272	0.0272	TRUE	NA
MGG_03477	5957	5495	7448	8417	5797	5459	8174	7837	6816.96	5628	8006	1.422	0.508	9.85013e-24	6.52756e-23	0.001	0.0011	0.0011	0.0011	TRUE	NA
MGG_02084	829	827	288	362	807	822	316	337	570.39	814	326	0.401	-1.317	9.86702e-24	6.53483e-23	0	0.0072	0.0061	0.0061	TRUE	NA
MGG_04689	68282	67783	75103	90414	66453	67344	82426	84181	75101	66898	83304	1.245	0.316	1.12548e-23	7.44949e-23	0.0001	0.0005	0.0005	0.0005	TRUE	NA
MGG_02432	3180	3238	1845	2047	3095	3217	2025	1906	2560.66	3156	1966	0.622	-0.684	1.12886e-23	7.46737e-23	0.0008	0.002	0.0018	0.0018	TRUE	NA
MGG_07815	3	1	328	392	3	1	360	365	182.22	2	362	184.372	7.526	1.16549e-23	7.70504e-23	0	0.0215	0.0193	0.0193	TRUE	NA
MGG_10097	23	12	189	234	22	12	207	218	114.9	17	212	12.375	3.629	1.18136e-23	7.80534e-23	0	0.0338	0.032	0.032	TRUE	NA
MGG_01776	1215	1222	1855	2325	1182	1214	2036	2165	1649.28	1198	2100	1.754	0.81	1.33233e-23	8.79751e-23	0	0.0028	0.0025	0.0025	TRUE	NA
MGG_01819	9475	8962	6081	6781	9221	8904	6674	6314	7778.15	9062	6494	0.716	-0.481	1.3809e-23	9.11279e-23	0.0008	0.001	0.001	0.001	TRUE	NA
MGG_05266	6696	6676	4074	5074	6517	6633	4471	4724	5586.21	6575	4598	0.7	-0.515	1.51536e-23	9.99411e-23	0.0005	0.0012	0.0011	0.0011	TRUE	NA
MGG_04181	9083	9957	3649	4823	8840	9892	4005	4491	6806.88	9366	4248	0.454	-1.141	1.62623e-23	1.07189e-22	0.0061	0.0011	0.0018	0.0061	TRUE	NA
MGG_07136	2613	2414	1366	1508	2543	2398	1499	1404	1961.15	2470	1452	0.587	-0.768	1.72024e-23	1.13319e-22	0.0014	0.0025	0.0023	0.0023	TRUE	NA
MGG_07402	551	542	132	190	536	538	145	177	349.13	537	161	0.3	-1.735	1.75334e-23	1.1543e-22	0	0.0115	0.0105	0.0105	TRUE	NA
MGG_03006	14365	13135	16670	19350	13980	13050	18295	18016	15835.4	13515	18156	1.343	0.426	1.83618e-23	1.20811e-22	0.0011	0.0007	0.0008	0.0008	TRUE	NA
MGG_09760	4559	4041	2475	2873	4437	4015	2716	2675	3460.74	4226	2696	0.638	-0.649	1.83842e-23	1.20887e-22	0.0024	0.0016	0.0017	0.0017	TRUE	NA
MGG_06500	1918	1915	983	1114	1867	1903	1079	1037	1471.32	1885	1058	0.561	-0.833	2.00154e-23	1.31535e-22	0	0.0031	0.0026	0.0026	TRUE	NA
MGG_03664	2548	2579	3522	4083	2480	2562	3865	3802	3177.25	2521	3834	1.52	0.605	2.18199e-23	1.43308e-22	0	0.0017	0.0014	0.0014	TRUE	NA
MGG_03525	5975	6026	3778	4442	5815	5987	4146	4136	5021.02	5901	4141	0.702	-0.511	2.47302e-23	1.62326e-22	0	0.0013	0.0011	0.0011	TRUE	NA
MGG_01088	650	684	1195	1420	633	680	1312	1322	986.45	656	1317	2.007	1.005	2.60358e-23	1.70794e-22	0	0.0044	0.0038	0.0038	TRUE	NA
MGG_01388	8	3	178	205	8	3	195	191	99.25	6	193	35.731	5.159	2.61438e-23	1.71401e-22	0	0.0391	0.0357	0.0357	TRUE	NA
MGG_06951	2223	2194	3062	3602	2163	2180	3361	3354	2764.37	2172	3358	1.546	0.628	2.68898e-23	1.76187e-22	0	0.0019	0.0015	0.0015	TRUE	NA
MGG_03178	2373	2547	3476	4057	2309	2531	3815	3777	3108.05	2420	3796	1.569	0.65	2.83215e-23	1.85458e-22	0.0014	0.0017	0.0017	0.0017	TRUE	NA
MGG_10253	1912	1692	838	1035	1861	1681	920	964	1356.3	1771	942	0.532	-0.911	2.88478e-23	1.88792e-22	0.0026	0.0033	0.0032	0.0032	TRUE	NA
MGG_02424	1000	911	1573	1856	973	905	1726	1728	1333.19	939	1727	1.839	0.879	2.93324e-23	1.9185e-22	0	0.0034	0.0029	0.0029	TRUE	NA
MGG_05904	1352	1377	628	712	1316	1368	689	663	1009	1342	676	0.504	-0.99	2.94235e-23	1.92332e-22	0	0.0043	0.0037	0.0037	TRUE	NA
MGG_07312	2307	2285	3171	3713	2245	2270	3480	3457	2863.16	2258	3468	1.536	0.619	3.10878e-23	2.03091e-22	0	0.0018	0.0015	0.0015	TRUE	NA
MGG_08542	4	5	183	213	4	5	201	198	102.01	4	200	45.096	5.495	3.19881e-23	2.08849e-22	0	0.0381	0.0336	0.0336	TRUE	NA
MGG_16213	3168	3285	1720	2180	3083	3264	1888	2030	2566.07	3174	1959	0.618	-0.695	3.2054e-23	2.09156e-22	0.0017	0.002	0.0019	0.0019	TRUE	NA
MGG_03588	76	48	298	367	74	48	327	342	197.6	61	334	5.493	2.458	4.15714e-23	2.71098e-22	0.022	0.0199	0.02	0.02	TRUE	NA
MGG_15689	27	22	195	246	26	22	214	229	122.8	24	222	9.203	3.202	4.26655e-23	2.78069e-22	0	0.0317	0.0276	0.0276	TRUE	NA
MGG_09118	819	690	1349	1604	797	686	1481	1493	1114.14	742	1487	2.006	1.004	4.42047e-23	2.8793e-22	0.0037	0.0039	0.0039	0.0039	TRUE	NA
MGG_14792	48	37	255	282	47	37	280	263	156.47	42	272	6.491	2.699	4.45687e-23	2.9013e-22	0	0.025	0.0221	0.0221	TRUE	NA
MGG_05644	2877	3095	1617	1923	2800	3075	1775	1790	2360	2938	1782	0.607	-0.72	4.72464e-23	3.0738e-22	0.002	0.0021	0.0021	0.0021	TRUE	NA
MGG_02962	2636	2461	3430	4207	2565	2445	3764	3917	3172.97	2505	3840	1.533	0.617	4.76933e-23	3.10104e-22	0.0006	0.0017	0.0015	0.0015	TRUE	NA
MGG_03707	633	588	195	206	616	584	214	192	401.51	600	203	0.338	-1.567	4.95951e-23	3.22281e-22	0	0.01	0.0088	0.0088	TRUE	NA
MGG_17216	53	68	281	351	52	68	308	327	188.59	60	318	5.337	2.416	5.03151e-23	3.26767e-22	0	0.0208	0.0189	0.0189	TRUE	NA
MGG_15895	6413	6220	4070	4641	6241	6180	4467	4321	5302.21	6210	4394	0.707	-0.5	5.81045e-23	3.77133e-22	0	0.0012	0.001	0.001	TRUE	NA
MGG_03857	3525	3380	2022	2345	3431	3358	2219	2183	2797.8	3394	2201	0.648	-0.625	6.04847e-23	3.92352e-22	0	0.0019	0.0016	0.0016	TRUE	NA
MGG_05571	1482	1457	2155	2602	1442	1448	2365	2423	1919.4	1445	2394	1.657	0.729	6.07528e-23	3.93859e-22	0	0.0025	0.0021	0.0021	TRUE	NA
MGG_02001	3326	3045	4225	5061	3237	3025	4637	4712	3902.81	3131	4674	1.493	0.578	6.09018e-23	3.94594e-22	0.0007	0.0015	0.0014	0.0014	TRUE	NA
MGG_09910	628	594	1108	1314	611	590	1216	1223	910.2	600	1220	2.031	1.022	6.1004e-23	3.95024e-22	0	0.0047	0.0039	0.0039	TRUE	NA
MGG_01764	61	55	301	308	59	55	330	287	182.78	57	308	5.407	2.435	6.35036e-23	4.10969e-22	0	0.0215	0.019	0.019	TRUE	NA
MGG_01176	1960	1785	906	1111	1907	1773	994	1034	1427.42	1840	1014	0.551	-0.859	6.54103e-23	4.23061e-22	0.0012	0.0032	0.0029	0.0029	TRUE	NA
MGG_05738	1699	1601	790	953	1653	1591	867	887	1249.61	1622	877	0.541	-0.887	7.05659e-23	4.56139e-22	0	0.0036	0.003	0.003	TRUE	NA
MGG_07718	730	741	254	302	710	736	279	281	501.65	723	280	0.387	-1.369	7.36593e-23	4.75856e-22	0	0.0081	0.0068	0.0068	TRUE	NA
MGG_11684	24	14	211	208	23	14	232	194	115.63	18	213	11.381	3.509	7.73732e-23	4.99557e-22	0.0168	0.0336	0.0324	0.0324	TRUE	NA
MGG_01261	6716	6872	4309	5111	6536	6827	4729	4759	5712.85	6682	4744	0.71	-0.494	7.9248e-23	5.11363e-22	0.0004	0.0012	0.001	0.001	TRUE	NA
MGG_02394	852	812	320	332	829	807	351	309	574.06	818	330	0.403	-1.311	8.22101e-23	5.30167e-22	0	0.0072	0.0064	0.0064	TRUE	NA
MGG_00786	8877	8821	10408	12774	8639	8764	11423	11893	10179.8	8702	11658	1.34	0.422	8.29931e-23	5.34904e-22	0.0004	0.0009	0.0008	0.0008	TRUE	NA
MGG_00805	1896	1803	2693	3062	1845	1791	2956	2851	2360.76	1818	2904	1.596	0.675	8.80548e-23	5.67196e-22	0	0.0021	0.0018	0.0018	TRUE	NA
MGG_00288	847	910	1446	1808	824	904	1587	1683	1249.69	864	1635	1.893	0.921	8.96019e-23	5.76826e-22	0.0019	0.0036	0.0033	0.0033	TRUE	NA
MGG_04842	3079	2834	1663	1908	2997	2816	1825	1776	2353.45	2906	1800	0.619	-0.691	8.98906e-23	5.78347e-22	0.0009	0.0021	0.0019	0.0019	TRUE	NA
MGG_03583	1010	936	377	464	983	930	414	432	689.66	956	423	0.442	-1.177	9.364e-23	6.0212e-22	0	0.0061	0.0052	0.0052	TRUE	NA
MGG_01467	2108	1984	2947	3336	2052	1971	3234	3106	2590.76	2012	3170	1.576	0.656	9.62632e-23	6.18627e-22	0	0.002	0.0017	0.0017	TRUE	NA
MGG_03505	11	8	149	223	11	8	164	208	97.45	10	186	19.9	4.315	9.64192e-23	6.19269e-22	0	0.0398	0.0375	0.0375	TRUE	NA
MGG_01049	1030	879	1732	1849	1002	873	1901	1722	1374.53	938	1812	1.93	0.949	9.74225e-23	6.25349e-22	0.0056	0.0033	0.0037	0.0037	TRUE	NA
MGG_01844	1977	1947	1026	1161	1924	1934	1126	1081	1516.36	1929	1104	0.572	-0.807	1.1523e-22	7.39223e-22	0	0.003	0.0025	0.0025	TRUE	NA
MGG_14602	362	363	864	871	352	361	948	811	618.04	356	880	2.465	1.302	1.27333e-22	8.16396e-22	0.0057	0.0067	0.0065	0.0065	TRUE	NA
MGG_15288	1955	1994	1032	1086	1903	1981	1133	1011	1506.87	1942	1072	0.551	-0.859	1.31758e-22	8.44276e-22	0.0026	0.003	0.003	0.003	TRUE	NA
MGG_02376	2882	2884	3769	4689	2805	2865	4136	4366	3543.09	2835	4251	1.5	0.585	1.36718e-22	8.75549e-22	0.0006	0.0016	0.0014	0.0014	TRUE	NA
MGG_03286	2007	1821	956	1133	1953	1809	1049	1055	1466.64	1881	1052	0.559	-0.838	1.55625e-22	9.96051e-22	0	0.0031	0.0028	0.0028	TRUE	NA
MGG_05951	3142	2560	7189	7730	3058	2543	7890	7197	5172.09	2800	7544	2.693	1.429	1.60769e-22	1.02838e-21	0.0101	0.0012	0.0024	0.0101	TRUE	NA
MGG_16389	623	588	1086	1310	606	584	1192	1220	900.52	595	1206	2.026	1.019	1.68402e-22	1.07659e-21	0	0.0048	0.004	0.004	TRUE	NA
MGG_03595	4732	5173	2840	3445	4605	5139	3117	3208	4017.29	4872	3162	0.649	-0.623	1.69139e-22	1.08067e-21	0.0027	0.0015	0.0017	0.0017	TRUE	NA
MGG_07517	489	433	123	121	476	430	135	113	288.44	453	124	0.272	-1.876	2.0301e-22	1.29633e-21	0.004	0.0138	0.0126	0.0126	TRUE	NA
MGG_04536	2378	2232	3199	3703	2314	2218	3511	3448	2872.62	2266	3480	1.535	0.618	2.10677e-22	1.34451e-21	0	0.0018	0.0016	0.0016	TRUE	NA
MGG_02449	2446	2724	1355	1557	2380	2706	1487	1450	2005.91	2543	1468	0.577	-0.793	2.23867e-22	1.42787e-21	0.004	0.0024	0.0027	0.0027	TRUE	NA
MGG_09244	3638	3538	2116	2501	3541	3515	2322	2329	2926.64	3528	2326	0.659	-0.601	2.31043e-22	1.47278e-21	0	0.0018	0.0015	0.0015	TRUE	NA
MGG_09977	5007	4690	6088	7170	4873	4660	6682	6676	5722.46	4766	6679	1.401	0.487	2.50604e-22	1.59656e-21	0.0003	0.0012	0.001	0.001	TRUE	NA
MGG_09349	14192	13334	16353	18783	13812	13248	17947	17488	15623.8	13530	17718	1.309	0.389	2.54879e-22	1.62285e-21	0.0005	0.0007	0.0007	0.0007	TRUE	NA
MGG_15238	942	1020	1637	1867	917	1013	1797	1738	1366.27	965	1768	1.831	0.873	2.5781e-22	1.64057e-21	0.0016	0.0033	0.0031	0.0031	TRUE	NA
MGG_03140	609	630	1103	1334	593	626	1211	1242	917.8	610	1226	2.013	1.009	2.76557e-22	1.75885e-21	0	0.0047	0.004	0.004	TRUE	NA
MGG_09383	304	197	1601	1783	296	196	1757	1660	977.19	246	1708	6.95	2.797	2.99454e-22	1.90338e-21	0.0376	0.0044	0.0069	0.0376	TRUE	NA
MGG_02244	1396	1380	664	699	1359	1371	729	651	1027.31	1365	690	0.505	-0.986	3.08107e-22	1.95725e-21	0.0013	0.0042	0.0039	0.0039	TRUE	NA
MGG_03039	8638	8191	10022	11842	8407	8138	10999	11026	9642.35	8272	11012	1.331	0.413	3.20262e-22	2.03329e-21	0.0001	0.0009	0.0008	0.0008	TRUE	NA
MGG_00341	4481	4184	2645	2993	4361	4157	2903	2787	3551.86	4259	2845	0.668	-0.583	3.2549e-22	2.0653e-21	0.0007	0.0016	0.0014	0.0014	TRUE	NA
MGG_09562	1721	1651	855	932	1675	1640	938	868	1280.33	1658	903	0.544	-0.877	3.39588e-22	2.15352e-21	0	0.0035	0.0031	0.0031	TRUE	NA
MGG_11040	2083	2026	2801	3528	2027	2013	3074	3285	2599.75	2020	3180	1.575	0.655	3.51592e-22	2.22836e-21	0.0009	0.002	0.0018	0.0018	TRUE	NA
MGG_03319	3190	3036	4177	4750	3105	3016	4584	4423	3781.93	3060	4504	1.471	0.557	3.59566e-22	2.2776e-21	0	0.0015	0.0013	0.0013	TRUE	NA
MGG_06514	4533	4570	2742	3317	4412	4540	3009	3088	3762.42	4476	3048	0.681	-0.554	3.67043e-22	2.32362e-21	0	0.0015	0.0013	0.0013	TRUE	NA
MGG_08855	1190	1189	1823	2150	1158	1181	2001	2002	1585.49	1170	2002	1.711	0.775	3.86527e-22	2.44557e-21	0	0.0029	0.0024	0.0024	TRUE	NA
MGG_02026	18654	19124	13017	15314	18154	19000	14286	14258	16424.7	18577	14272	0.768	-0.38	4.6677e-22	2.95158e-21	0.0004	0.0007	0.0007	0.0007	TRUE	NA
MGG_01603	46	36	226	291	45	36	248	271	149.88	40	260	6.444	2.688	4.69625e-22	2.96794e-21	0	0.0261	0.0231	0.0231	TRUE	NA
MGG_13895	570	570	160	213	555	566	176	198	373.74	560	187	0.334	-1.581	4.78659e-22	3.0233e-21	0	0.0107	0.0093	0.0093	TRUE	NA
MGG_01070	7876	8468	10081	12706	7665	8413	11064	11830	9743.06	8039	11447	1.424	0.51	4.81034e-22	3.03656e-21	0.0031	0.0009	0.0012	0.0012	TRUE	NA
MGG_05674	1244	1196	1827	2253	1211	1188	2005	2098	1625.44	1200	2052	1.711	0.775	5.02411e-22	3.16969e-21	0	0.0029	0.0024	0.0024	TRUE	NA
MGG_06403	5982	5808	3795	4364	5822	5770	4165	4063	4955.08	5796	4114	0.71	-0.495	5.61856e-22	3.54271e-21	0	0.0013	0.0011	0.0011	TRUE	NA
MGG_12101	1527	1517	2176	2746	1486	1507	2388	2557	1984.54	1496	2472	1.653	0.725	5.83686e-22	3.67825e-21	0.0009	0.0024	0.0022	0.0022	TRUE	NA
MGG_08199	1287	1217	536	680	1253	1209	588	633	920.76	1231	610	0.497	-1.01	6.06749e-22	3.82141e-21	0	0.0047	0.0041	0.0041	TRUE	NA
MGG_17450	2678	2606	1327	1757	2606	2589	1456	1636	2071.91	2598	1546	0.596	-0.747	6.12336e-22	3.8544e-21	0.0023	0.0023	0.0024	0.0024	TRUE	NA
MGG_01818	1438	1492	2147	2589	1399	1482	2356	2411	1912.17	1440	2384	1.654	0.726	6.59969e-22	4.15187e-21	0	0.0025	0.0022	0.0022	TRUE	NA
MGG_00578	49	27	308	254	48	27	338	236	162.26	38	287	7.688	2.943	6.91684e-22	4.34891e-21	0.0869	0.0241	0.0301	0.0301	TRUE	NA
MGG_03870	3300	3129	1872	2179	3212	3109	2055	2029	2600.91	3160	2042	0.646	-0.63	6.93889e-22	4.36029e-21	0	0.002	0.0017	0.0017	TRUE	NA
MGG_12515	1434	1271	626	641	1396	1263	687	597	985.55	1330	642	0.482	-1.052	7.46814e-22	4.6902e-21	0.006	0.0044	0.0046	0.0046	TRUE	NA
MGG_10569	7330	6837	4427	5419	7134	6793	4859	5045	5957.61	6964	4952	0.711	-0.491	7.56822e-22	4.75035e-21	0.0008	0.0011	0.0011	0.0011	TRUE	NA
MGG_13518	2608	2314	1311	1315	2538	2299	1439	1224	1875.08	2418	1332	0.55	-0.863	7.72186e-22	4.84403e-21	0.0078	0.0025	0.0033	0.0033	TRUE	NA
MGG_01682	528	535	156	183	514	532	171	170	346.75	523	170	0.327	-1.614	7.86833e-22	4.93311e-21	0	0.0115	0.0097	0.0097	TRUE	NA
MGG_03227	3756	3597	2148	2606	3655	3574	2357	2426	3003.22	3614	2392	0.662	-0.595	8.01474e-22	5.02205e-21	0	0.0018	0.0015	0.0015	TRUE	NA
MGG_10181	44259	45794	31188	37540	43073	45497	34229	34952	39438	44285	34590	0.781	-0.356	9.23691e-22	5.78459e-21	0.0008	0.0006	0.0006	0.0006	TRUE	NA
MGG_09766	3888	3815	2213	2769	3784	3790	2429	2578	3145.26	3787	2504	0.661	-0.596	9.40343e-22	5.88554e-21	0.0004	0.0017	0.0015	0.0015	TRUE	NA
MGG_10467	3	1	286	305	3	1	314	284	150.44	2	299	151.966	7.248	1.05248e-21	6.58366e-21	0	0.026	0.0237	0.0237	TRUE	NA
MGG_02927	2913	3080	1676	1988	2835	3060	1839	1851	2396.35	2948	1845	0.626	-0.676	1.17917e-21	7.37198e-21	0.0012	0.0021	0.002	0.002	TRUE	NA
MGG_07355	1769	1859	816	1094	1722	1847	896	1019	1370.68	1784	958	0.537	-0.897	1.19399e-21	7.46043e-21	0.0043	0.0033	0.0034	0.0034	TRUE	NA
MGG_02099	6108	6245	7555	8880	5944	6205	8292	8268	7177.11	6074	8280	1.363	0.447	1.26973e-21	7.92918e-21	0.0003	0.001	0.0009	0.0009	TRUE	NA
MGG_07924	87	69	348	344	85	69	382	320	213.86	77	351	4.576	2.194	1.47699e-21	9.21824e-21	0.0117	0.0184	0.0176	0.0176	TRUE	NA
MGG_15749	3926	3953	2405	2739	3821	3927	2639	2550	3234.48	3874	2594	0.67	-0.579	1.53115e-21	9.55087e-21	0	0.0017	0.0014	0.0014	TRUE	NA
MGG_04331	2206	2076	1106	1363	2147	2063	1214	1269	1673.09	2105	1242	0.59	-0.761	1.55176e-21	9.674e-21	0	0.0028	0.0024	0.0024	TRUE	NA
MGG_09882	16056	15384	10916	12846	15626	15284	11980	11960	13712.8	15455	11970	0.775	-0.369	1.60577e-21	1.0005e-20	0	0.0008	0.0006	0.0006	TRUE	NA
MGG_00700	4503	4294	5439	6668	4382	4266	5969	6208	5206.56	4324	6088	1.408	0.494	1.6745e-21	1.04274e-20	0.0004	0.0012	0.0011	0.0011	TRUE	NA
MGG_13781	3605	3408	2102	2346	3508	3386	2307	2184	2846.4	3447	2246	0.651	-0.619	1.81393e-21	1.12893e-20	0.0006	0.0018	0.0017	0.0017	TRUE	NA
MGG_09285	4299	4256	2630	3086	4184	4228	2886	2873	3542.99	4206	2880	0.685	-0.547	1.81801e-21	1.13083e-20	0	0.0016	0.0013	0.0013	TRUE	NA
MGG_01589	20091	20654	23245	27957	19553	20520	25511	26030	22903.6	20036	25770	1.286	0.363	2.13672e-21	1.32833e-20	0.0006	0.0007	0.0007	0.0007	TRUE	NA
MGG_01996	254	230	557	733	247	229	611	682	442.37	238	646	2.721	1.444	2.15086e-21	1.33636e-20	0	0.0092	0.0083	0.0083	TRUE	NA
MGG_17535	212	191	505	628	206	190	554	585	383.76	198	570	2.876	1.524	2.2096e-21	1.37209e-20	0	0.0105	0.009	0.009	TRUE	NA
MGG_07429	99	106	354	410	96	105	389	382	242.98	100	386	3.82	1.934	2.47568e-21	1.53645e-20	0	0.0163	0.0138	0.0138	TRUE	NA
MGG_00922	28353	28734	31920	38614	27594	28548	35032	35952	31781.5	28071	35492	1.264	0.339	2.51887e-21	1.56238e-20	0.0004	0.0006	0.0006	0.0006	TRUE	NA
MGG_08476	338	309	63	73	329	307	69	68	193.26	318	68	0.216	-2.214	2.55218e-21	1.58215e-20	0	0.0203	0.0173	0.0173	TRUE	NA
MGG_00535	4141	4173	5280	6118	4030	4146	5795	5696	4916.78	4088	5746	1.405	0.491	2.60981e-21	1.61697e-20	0	0.0013	0.0011	0.0011	TRUE	NA
MGG_10379	462	478	874	1124	450	475	959	1047	732.57	462	1003	2.171	1.118	2.76981e-21	1.71514e-20	0	0.0057	0.0051	0.0051	TRUE	NA
MGG_00127	748	607	1210	1524	728	603	1328	1419	1019.49	666	1374	2.064	1.045	2.82373e-21	1.74755e-20	0.0077	0.0043	0.0047	0.0047	TRUE	NA
MGG_03926	5809	5876	7069	8467	5653	5838	7758	7883	6783.23	5746	7820	1.361	0.445	3.03819e-21	1.87922e-20	0.0001	0.0011	0.0009	0.0009	TRUE	NA
MGG_02914	833	732	273	345	811	727	300	321	539.7	769	310	0.404	-1.308	3.1097e-21	1.92238e-20	0	0.0076	0.0069	0.0069	TRUE	NA
MGG_10412	3480	3187	1946	2239	3387	3166	2136	2085	2693.38	3276	2110	0.644	-0.635	3.23039e-21	1.99587e-20	0.001	0.0019	0.0018	0.0018	TRUE	NA
MGG_05785	854	776	318	302	831	771	349	281	558.07	801	315	0.392	-1.35	3.31273e-21	2.0456e-20	0.0086	0.0074	0.0076	0.0076	TRUE	NA
MGG_05025	620	637	217	199	603	633	238	185	414.93	618	212	0.341	-1.551	3.34528e-21	2.06454e-20	0.0098	0.0097	0.0097	0.0097	TRUE	NA
MGG_06426	1463	1346	607	799	1424	1337	666	744	1042.8	1380	705	0.511	-0.968	3.43097e-21	2.11624e-20	0.0026	0.0042	0.004	0.004	TRUE	NA
MGG_07764	161	143	457	497	157	142	502	463	315.76	150	482	3.225	1.689	3.4348e-21	2.11742e-20	0	0.0126	0.011	0.011	TRUE	NA
MGG_15325	5265	5297	3242	3976	5124	5263	3558	3702	4411.67	5194	3630	0.699	-0.516	3.56026e-21	2.19354e-20	0.0003	0.0014	0.0012	0.0012	TRUE	NA
MGG_13552	1443	1465	2085	2747	1404	1456	2288	2558	1926.45	1430	2423	1.696	0.762	3.64183e-21	2.24255e-20	0.0031	0.0025	0.0026	0.0026	TRUE	NA
MGG_05702	4075	3850	2406	2807	3966	3825	2641	2614	3261.25	3896	2628	0.674	-0.569	3.77294e-21	2.32198e-20	0	0.0017	0.0014	0.0014	TRUE	NA
MGG_14976	2598	2427	1415	1515	2528	2411	1553	1411	1975.8	2470	1482	0.599	-0.738	3.79809e-21	2.33616e-20	0.0022	0.0024	0.0024	0.0024	TRUE	NA
MGG_03192	1874	1742	2587	2982	1824	1731	2839	2776	2292.55	1778	2808	1.58	0.66	4.09053e-21	2.51464e-20	0	0.0022	0.0019	0.0019	TRUE	NA
MGG_06410	1575	1471	2195	2630	1533	1461	2409	2449	1963	1497	2429	1.622	0.698	4.18583e-21	2.57179e-20	0	0.0024	0.0021	0.0021	TRUE	NA
MGG_06472	5504	5560	6702	8512	5357	5524	7355	7925	6540.31	5440	7640	1.405	0.49	5.34755e-21	3.28373e-20	0.0013	0.0011	0.0012	0.0012	TRUE	NA
MGG_03628	877	765	1404	1605	854	760	1541	1494	1162.2	807	1518	1.88	0.911	6.25692e-21	3.84001e-20	0.0021	0.0038	0.0036	0.0036	TRUE	NA
MGG_02347	27088	28171	18551	22814	26362	27989	20360	21241	23988	27176	20800	0.766	-0.386	6.35361e-21	3.89719e-20	0.0013	0.0007	0.0008	0.0008	TRUE	NA
MGG_13168	5568	5283	3445	4047	5419	5249	3781	3768	4554.14	5334	3774	0.708	-0.499	6.49246e-21	3.98014e-20	0	0.0013	0.0011	0.0011	TRUE	NA
MGG_05994	1237	1150	535	635	1204	1143	587	591	881.2	1174	589	0.502	-0.994	6.74852e-21	4.13483e-20	0	0.0048	0.0041	0.0041	TRUE	NA
MGG_00449	3714	3489	2139	2534	3615	3466	2348	2359	2946.95	3540	2354	0.665	-0.589	6.92329e-21	4.23955e-20	0	0.0018	0.0015	0.0015	TRUE	NA
MGG_00720	1518	1528	2221	2568	1477	1518	2438	2391	1955.99	1498	2414	1.612	0.689	7.03434e-21	4.30517e-20	0	0.0025	0.0021	0.0021	TRUE	NA
MGG_06790	5	2	171	201	5	2	188	187	95.42	4	188	54.483	5.768	7.32415e-21	4.48006e-20	0	0.0407	0.0365	0.0365	TRUE	NA
MGG_01156	4891	4604	2921	3501	4760	4574	3206	3260	3949.91	4667	3233	0.693	-0.53	7.34388e-21	4.48964e-20	0	0.0015	0.0013	0.0013	TRUE	NA
MGG_03280	1609	1567	812	878	1566	1557	891	817	1207.85	1562	854	0.547	-0.871	8.1047e-21	4.95202e-20	0.0001	0.0037	0.0033	0.0033	TRUE	NA
MGG_10105	136	121	391	464	132	120	429	432	278.43	126	430	3.409	1.769	8.1304e-21	4.96498e-20	0	0.0143	0.0121	0.0121	TRUE	NA
MGG_00460	1970	2016	1073	1194	1917	2003	1178	1112	1552.37	1960	1145	0.584	-0.777	8.92522e-21	5.44734e-20	0	0.003	0.0026	0.0026	TRUE	NA
MGG_00124	5523	5399	3514	3801	5375	5364	3857	3539	4533.67	5370	3698	0.688	-0.539	9.04347e-21	5.51647e-20	0.0014	0.0013	0.0014	0.0014	TRUE	NA
MGG_17936	466	450	130	141	454	447	143	131	293.64	450	137	0.304	-1.719	9.12029e-21	5.56026e-20	0	0.0135	0.0115	0.0115	TRUE	NA
MGG_05095	1618	1447	737	869	1575	1438	809	809	1157.56	1506	809	0.537	-0.897	9.25354e-21	5.63838e-20	0.0017	0.0038	0.0035	0.0035	TRUE	NA
MGG_04327	1963	2000	2789	3190	1910	1987	3061	2970	2482.12	1948	3016	1.547	0.63	9.534e-21	5.80607e-20	0	0.002	0.0018	0.0018	TRUE	NA
MGG_08259	2510	2451	1371	1653	2443	2435	1505	1539	1980.4	2439	1522	0.624	-0.68	9.56775e-21	5.82341e-20	0	0.0024	0.002	0.002	TRUE	NA
MGG_00255	3868	3571	4741	5656	3764	3548	5203	5266	4445.41	3656	5234	1.432	0.518	9.73332e-21	5.92093e-20	0.0006	0.0014	0.0012	0.0012	TRUE	NA
MGG_09313	1179	1106	456	616	1147	1099	500	574	830.06	1123	537	0.479	-1.062	9.88319e-21	6.00879e-20	0.0029	0.0051	0.0048	0.0048	TRUE	NA
MGG_00860	2051	1996	2873	3213	1996	1983	3153	2992	2530.94	1990	3072	1.544	0.626	1.25054e-20	7.59885e-20	0	0.002	0.0018	0.0018	TRUE	NA
MGG_15817	1905	1923	2602	3313	1854	1911	2856	3085	2426.21	1882	2970	1.579	0.659	1.25272e-20	7.60792e-20	0.0014	0.0021	0.002	0.002	TRUE	NA
MGG_16507	38	52	252	268	37	52	277	250	153.69	44	264	5.936	2.57	1.32999e-20	8.07277e-20	0.0037	0.0254	0.0236	0.0236	TRUE	NA
MGG_01822	3497	3573	4479	5389	3403	3550	4916	5018	4221.6	3476	4967	1.429	0.515	1.39852e-20	8.48405e-20	0.0003	0.0014	0.0012	0.0012	TRUE	NA
MGG_11149	5245	4960	3246	3508	5105	4928	3562	3266	4215.26	5016	3414	0.68	-0.556	1.58134e-20	9.58783e-20	0.0017	0.0014	0.0015	0.0015	TRUE	NA
MGG_06322	1432	1394	660	822	1394	1385	724	765	1067.07	1390	744	0.536	-0.898	1.62143e-20	9.82555e-20	0	0.0041	0.0035	0.0035	TRUE	NA
MGG_07802	1323	1274	586	736	1288	1266	643	685	970.43	1277	664	0.521	-0.942	1.72799e-20	1.04655e-19	0	0.0044	0.0038	0.0038	TRUE	NA
MGG_12752	3119	2903	3957	4605	3035	2884	4343	4288	3637.51	2960	4316	1.458	0.544	1.80559e-20	1.09295e-19	0.0003	0.0015	0.0014	0.0014	TRUE	NA
MGG_09796	318	289	62	46	309	287	68	43	176.87	298	56	0.184	-2.44	1.87411e-20	1.13381e-19	0.0265	0.0222	0.0224	0.0224	TRUE	NA
MGG_05148	155	135	427	484	151	134	469	451	301.06	142	460	3.224	1.689	1.90015e-20	1.14893e-19	0	0.0132	0.0114	0.0114	TRUE	NA
MGG_10315	2543	2537	3365	3951	2475	2521	3693	3679	3091.8	2498	3686	1.476	0.561	1.99576e-20	1.20608e-19	0	0.0017	0.0014	0.0014	TRUE	NA
MGG_08462	130	77	913	963	127	77	1002	897	525.41	102	950	9.347	3.225	2.026e-20	1.22369e-19	0.0529	0.0078	0.0103	0.0529	TRUE	NA
MGG_00161	1362	1410	622	801	1326	1401	683	746	1038.7	1364	714	0.524	-0.931	2.56237e-20	1.5468e-19	0.0014	0.0042	0.0038	0.0038	TRUE	NA
MGG_08265	49	62	286	282	48	62	314	263	171.43	55	288	5.272	2.398	2.67202e-20	1.61212e-19	0.0128	0.0228	0.0217	0.0217	TRUE	NA
MGG_13677	5147	5162	3314	3769	5009	5129	3637	3509	4321	5069	3573	0.705	-0.505	2.71052e-20	1.63445e-19	0	0.0014	0.0012	0.0012	TRUE	NA
MGG_01026	21039	20167	14611	17205	20475	20036	16036	16019	18141.6	20256	16028	0.791	-0.338	2.72412e-20	1.64176e-19	0.0001	0.0007	0.0006	0.0006	TRUE	NA
MGG_02881	813	843	336	361	791	838	369	336	583.41	814	352	0.432	-1.21	2.77999e-20	1.67451e-19	0	0.0071	0.0062	0.0062	TRUE	NA
MGG_03446	16227	14855	19295	21265	15792	14759	21176	19799	17881.6	15276	20488	1.341	0.423	2.81e-20	1.69167e-19	0.0022	0.0007	0.001	0.001	TRUE	NA
MGG_10215	446	447	125	141	434	444	137	131	286.66	439	134	0.306	-1.711	2.82731e-20	1.70116e-19	0	0.0139	0.0116	0.0116	TRUE	NA
MGG_02475	1896	2072	1042	1146	1845	2059	1144	1067	1528.6	1952	1106	0.566	-0.821	2.94238e-20	1.76943e-19	0.0037	0.003	0.0031	0.0031	TRUE	NA
MGG_09919	9255	8818	6140	6963	9007	8761	6739	6483	7747.41	8884	6611	0.744	-0.427	2.95902e-20	1.77847e-19	0.0004	0.001	0.0009	0.0009	TRUE	NA
MGG_02605	4029	4104	2370	2978	3921	4077	2601	2773	3343.07	3999	2687	0.672	-0.573	3.59729e-20	2.16092e-19	0.001	0.0016	0.0016	0.0016	TRUE	NA
MGG_00312	1282	1425	588	751	1248	1416	645	699	1002	1332	672	0.505	-0.985	3.88191e-20	2.33062e-19	0.0048	0.0043	0.0044	0.0044	TRUE	NA
MGG_03896	635	633	174	267	618	629	191	249	421.61	624	220	0.354	-1.499	3.95314e-20	2.3721e-19	0.0111	0.0096	0.0097	0.0097	TRUE	NA
MGG_10322	1648	1673	865	956	1604	1662	949	890	1276.36	1633	920	0.563	-0.829	4.13994e-20	2.48284e-19	0	0.0035	0.0031	0.0031	TRUE	NA
MGG_04340	43798	40161	29471	32219	42625	39901	32345	29998	36217	41263	31172	0.755	-0.405	4.24286e-20	2.54318e-19	0.0024	0.0006	0.0009	0.0009	TRUE	NA
MGG_02738	1739	1662	822	1054	1692	1651	902	981	1306.79	1672	942	0.564	-0.827	4.59654e-20	2.75369e-19	0.0006	0.0034	0.0031	0.0031	TRUE	NA
MGG_00175	25536	23926	17549	19682	24852	23771	19260	18325	21552.1	24312	18792	0.773	-0.372	4.73722e-20	2.83643e-19	0.001	0.0007	0.0007	0.0007	TRUE	NA
MGG_11567	1093	970	1705	1866	1064	964	1871	1737	1409.01	1014	1804	1.779	0.831	4.78879e-20	2.86575e-19	0.0029	0.0032	0.0032	0.0032	TRUE	NA
MGG_03336	14070	14381	9380	11653	13693	14288	10295	10850	12281.3	13990	10572	0.756	-0.404	4.89569e-20	2.92814e-19	0.001	0.0008	0.0008	0.0008	TRUE	NA
MGG_01693	8691	7660	10945	11822	8458	7610	12012	11007	9771.95	8034	11510	1.432	0.518	4.92424e-20	2.94362e-19	0.0045	0.0009	0.0014	0.0014	TRUE	NA
MGG_03982	35014	34085	25141	29492	34076	33864	27592	27459	30747.9	33970	27526	0.81	-0.304	5.22829e-20	3.12368e-19	0	0.0006	0.0005	0.0005	TRUE	NA
MGG_12595	12	17	156	186	12	17	171	173	93.24	14	172	12.07	3.593	5.66689e-20	3.3839e-19	0	0.0416	0.0367	0.0367	TRUE	NA
MGG_06032	302	245	624	743	294	243	685	692	478.49	268	688	2.561	1.357	5.71113e-20	3.40848e-19	0.0037	0.0085	0.008	0.008	TRUE	NA
MGG_08867	1585	1641	695	970	1543	1630	763	903	1209.7	1586	833	0.526	-0.927	5.75061e-20	3.43018e-19	0.006	0.0037	0.004	0.004	TRUE	NA
MGG_01220	957	758	1496	1747	931	753	1642	1627	1238.22	842	1634	1.94	0.956	6.11057e-20	3.64293e-19	0.0094	0.0036	0.0044	0.0044	TRUE	NA
MGG_01048	579	580	1071	1174	563	576	1175	1093	852.06	570	1134	1.989	0.992	6.16253e-20	3.67193e-19	0	0.005	0.0044	0.0044	TRUE	NA
MGG_07871	9	5	157	155	9	5	172	144	82.59	7	158	22.995	4.523	6.78411e-20	4.04011e-19	0	0.0469	0.0432	0.0432	TRUE	NA
MGG_07576	676	567	213	192	658	563	234	179	408.44	610	206	0.337	-1.571	6.95989e-20	4.14097e-19	0.0191	0.0099	0.011	0.011	TRUE	NA
MGG_08171	1049	925	396	499	1021	919	435	465	709.78	970	450	0.464	-1.108	6.96097e-20	4.14097e-19	0.0028	0.0059	0.0054	0.0054	TRUE	NA
MGG_08896	1823	1727	869	1114	1774	1716	954	1037	1370.23	1745	996	0.571	-0.809	6.98485e-20	4.15294e-19	0.0009	0.0033	0.003	0.003	TRUE	NA
MGG_07296	385	331	736	874	375	329	808	814	581.26	352	811	2.304	1.204	7.16771e-20	4.25937e-19	0.0002	0.0071	0.0063	0.0063	TRUE	NA
MGG_04901	2432	2443	1387	1598	2367	2427	1522	1488	1951.03	2397	1505	0.628	-0.672	7.28173e-20	4.3248e-19	0	0.0025	0.0021	0.0021	TRUE	NA
MGG_15266	39	56	261	267	38	56	286	249	157.16	47	268	5.717	2.515	7.50875e-20	4.45724e-19	0.0156	0.0249	0.0241	0.0241	TRUE	NA
MGG_12473	2439	2425	1386	1599	2374	2409	1521	1489	1948.22	2392	1505	0.629	-0.668	8.42489e-20	4.99837e-19	0	0.0025	0.002	0.002	TRUE	NA
MGG_00268	74	106	341	387	72	105	374	360	227.98	88	367	4.145	2.051	8.89829e-20	5.2764e-19	0.0194	0.0173	0.0175	0.0175	TRUE	NA
MGG_00336	5101	4787	3155	3597	4964	4756	3463	3349	4133	4860	3406	0.701	-0.513	9.04928e-20	5.36306e-19	0.0005	0.0014	0.0013	0.0013	TRUE	NA
MGG_17732	1611	1556	2228	2647	1568	1546	2445	2465	2005.88	1557	2455	1.577	0.657	9.17248e-20	5.43316e-19	0	0.0024	0.002	0.002	TRUE	NA
MGG_08429	10	4	141	171	10	4	155	159	81.92	7	157	22.834	4.513	9.28382e-20	5.49616e-19	0	0.0473	0.0435	0.0435	TRUE	NA
MGG_12267	1277	1185	1848	2145	1243	1177	2028	1997	1611.36	1210	2012	1.663	0.734	9.50547e-20	5.62437e-19	0	0.0029	0.0025	0.0025	TRUE	NA
MGG_05280	16970	17755	11504	14170	16515	17640	12626	13193	14993.6	17078	12910	0.756	-0.403	9.98843e-20	5.90697e-19	0.0014	0.0008	0.0009	0.0009	TRUE	NA
MGG_03737	2256	2208	1258	1424	2196	2194	1381	1326	1773.94	2195	1354	0.616	-0.698	1.00123e-19	5.91794e-19	0	0.0027	0.0022	0.0022	TRUE	NA
MGG_07243	2784	2522	3475	4465	2709	2506	3814	4157	3296.53	2608	3986	1.529	0.613	1.05362e-19	6.22422e-19	0.0027	0.0017	0.0019	0.0019	TRUE	NA
MGG_10035	6368	5926	3868	4726	6197	5888	4245	4400	5182.6	6042	4322	0.716	-0.483	1.31477e-19	7.76282e-19	0.0008	0.0012	0.0012	0.0012	TRUE	NA
MGG_07305	488	636	1074	1404	475	632	1179	1307	898.19	554	1243	2.248	1.168	1.329e-19	7.84263e-19	0.0202	0.0048	0.0067	0.0067	TRUE	NA
MGG_05124	268	263	593	691	261	261	651	643	454.08	261	647	2.479	1.309	1.5966e-19	9.41681e-19	0	0.0089	0.0074	0.0074	TRUE	NA
MGG_16813	1	7	166	164	1	7	182	153	85.7	4	168	42.485	5.409	1.64195e-19	9.67908e-19	0.0142	0.0452	0.0443	0.0443	TRUE	NA
MGG_06090	549	553	1045	1119	534	549	1147	1042	818.12	542	1094	2.018	1.013	1.65168e-19	9.73125e-19	0	0.0052	0.0047	0.0047	TRUE	NA
MGG_08123	160	168	426	533	156	167	468	496	321.61	162	482	2.989	1.58	1.67833e-19	9.883e-19	0	0.0124	0.0106	0.0106	TRUE	NA
MGG_08187	1068	1090	454	586	1039	1083	498	546	791.55	1061	522	0.492	-1.022	1.68474e-19	9.91547e-19	0	0.0053	0.0047	0.0047	TRUE	NA
MGG_12797	38076	39003	43059	54584	37056	38750	47257	50821	43471.3	37903	49039	1.294	0.372	1.68989e-19	9.94046e-19	0.0018	0.0006	0.0008	0.0008	TRUE	NA
MGG_04466	3774	3335	2101	2364	3673	3313	2306	2201	2873.3	3493	2254	0.645	-0.633	1.819e-19	1.06942e-18	0.0029	0.0018	0.002	0.002	TRUE	NA
MGG_17000	1743	1722	912	1064	1696	1711	1001	991	1349.68	1704	996	0.584	-0.775	1.96827e-19	1.15657e-18	0	0.0033	0.0028	0.0028	TRUE	NA
MGG_14970	822	746	303	362	800	741	333	337	552.68	770	335	0.435	-1.202	1.98899e-19	1.16812e-18	0	0.0074	0.0064	0.0064	TRUE	NA
MGG_08521	161	132	445	468	157	131	488	436	302.99	144	462	3.207	1.681	2.07654e-19	1.21889e-18	0.0056	0.0131	0.0122	0.0122	TRUE	NA
MGG_00583	640	702	246	270	623	697	270	251	460.42	660	260	0.395	-1.342	2.13749e-19	1.254e-18	0	0.0088	0.008	0.008	TRUE	NA
MGG_06157	724	762	291	320	705	757	319	298	519.75	731	308	0.422	-1.245	2.14174e-19	1.25583e-18	0	0.0079	0.0069	0.0069	TRUE	NA
MGG_07545	968	927	388	491	942	921	426	457	686.51	932	442	0.474	-1.076	2.24909e-19	1.31808e-18	0	0.0061	0.0052	0.0052	TRUE	NA
MGG_08611	2368	2218	1273	1510	2305	2204	1397	1406	1827.81	2254	1402	0.622	-0.686	2.42231e-19	1.41884e-18	0	0.0026	0.0022	0.0022	TRUE	NA
MGG_07462	924	928	362	479	899	922	397	446	666.13	910	422	0.464	-1.109	2.54124e-19	1.48771e-18	0	0.0062	0.0056	0.0056	TRUE	NA
MGG_04012	7366	7064	4817	5649	7169	7018	5287	5260	6183.3	7094	5274	0.743	-0.428	2.65241e-19	1.55197e-18	0	0.0011	0.0009	0.0009	TRUE	NA
MGG_08686	1	1	572	635	1	1	628	591	305.24	1	610	619.681	9.275	2.72657e-19	1.59452e-18	0	0.013	0.0118	0.0118	TRUE	NA
MGG_10653	5223	5230	3400	3878	5083	5196	3732	3611	4405.35	5140	3672	0.714	-0.486	2.83678e-19	1.65809e-18	0	0.0014	0.0012	0.0012	TRUE	NA
MGG_08304	668	812	1352	1516	650	807	1484	1411	1088.04	728	1448	1.987	0.991	2.86026e-19	1.67093e-18	0.0101	0.004	0.0048	0.0048	TRUE	NA
MGG_16316	369	317	68	96	359	315	75	89	209.52	337	82	0.244	-2.035	2.87022e-19	1.67586e-18	0	0.0188	0.0171	0.0171	TRUE	NA
MGG_05936	3546	3232	2014	2354	3451	3211	2210	2192	2766.04	3331	2201	0.661	-0.598	2.88999e-19	1.68651e-18	0.0011	0.0019	0.0018	0.0018	TRUE	NA
MGG_04793	13262	14457	20850	26142	12907	14363	22883	24340	18623.2	13635	23612	1.732	0.792	2.93519e-19	1.71199e-18	0.0037	0.0007	0.0012	0.0037	TRUE	NA
MGG_01240	2429	2372	3109	3854	2364	2357	3412	3588	2930.26	2360	3500	1.483	0.569	2.9869e-19	1.74123e-18	0	0.0018	0.0016	0.0016	TRUE	NA
MGG_00408	7445	7141	4777	5787	7246	7095	5243	5388	6242.79	7170	5316	0.741	-0.432	3.06727e-19	1.78714e-18	0	0.0011	0.0009	0.0009	TRUE	NA
MGG_01062	15212	15531	17353	21057	14805	15430	19045	19605	17221.3	15118	19325	1.278	0.354	3.36786e-19	1.96124e-18	0.0005	0.0007	0.0007	0.0007	TRUE	NA
MGG_07663	1164	1070	520	575	1133	1063	571	535	825.49	1098	553	0.503	-0.991	3.77298e-19	2.196e-18	0	0.0051	0.0045	0.0045	TRUE	NA
MGG_14540	19	29	170	221	18	29	187	206	109.91	24	196	8.309	3.055	3.78736e-19	2.20321e-18	0.0007	0.0354	0.0327	0.0327	TRUE	NA
MGG_14126	2	1	270	346	2	1	296	322	155.35	2	309	209.78	7.713	3.98516e-19	2.31705e-18	0	0.0252	0.0228	0.0228	TRUE	NA
MGG_06190	1338	1266	1897	2231	1302	1258	2082	2077	1679.78	1280	2080	1.625	0.7	4.10129e-19	2.38332e-18	0	0.0028	0.0023	0.0023	TRUE	NA
MGG_03823	1471	1520	2221	2466	1432	1510	2438	2296	1918.83	1471	2367	1.609	0.686	4.41667e-19	2.56524e-18	0.0011	0.0025	0.0023	0.0023	TRUE	NA
MGG_16596	2137	2069	1152	1379	2080	2056	1264	1284	1670.9	2068	1274	0.616	-0.698	4.44759e-19	2.58184e-18	0	0.0028	0.0023	0.0023	TRUE	NA
MGG_01744	3077	2726	1679	1785	2995	2708	1843	1662	2301.89	2852	1752	0.614	-0.704	4.54358e-19	2.63618e-18	0.0043	0.0022	0.0025	0.0025	TRUE	NA
MGG_09541	1008	1010	456	513	981	1003	500	478	740.64	992	489	0.493	-1.022	4.72846e-19	2.74201e-18	0	0.0057	0.0048	0.0048	TRUE	NA
MGG_03184	865	746	305	376	842	741	335	350	566.95	792	342	0.433	-1.208	4.7742e-19	2.76708e-18	0.0037	0.0073	0.0067	0.0067	TRUE	NA
MGG_08130	192	205	506	559	187	204	555	520	366.58	196	538	2.754	1.461	5.00893e-19	2.90161e-18	0	0.0109	0.0095	0.0095	TRUE	NA
MGG_02823	1572	1568	2311	2547	1530	1558	2536	2371	1998.87	1544	2454	1.589	0.668	5.04238e-19	2.91946e-18	0.0009	0.0024	0.0022	0.0022	TRUE	NA
MGG_03841	7522	7445	4929	5979	7321	7397	5410	5567	6423.43	7359	5488	0.746	-0.423	5.14983e-19	2.9801e-18	0	0.0011	0.0009	0.0009	TRUE	NA
MGG_00952	533	538	1018	1085	519	535	1117	1010	795.18	527	1064	2.019	1.013	5.8064e-19	3.35829e-18	0	0.0053	0.0048	0.0048	TRUE	NA
MGG_12601	303	300	60	76	295	298	66	71	182.39	296	68	0.231	-2.116	5.91901e-19	3.42163e-18	0	0.0215	0.0181	0.0181	TRUE	NA
MGG_08016	102	124	398	394	99	123	437	367	256.53	111	402	3.61	1.852	6.0422e-19	3.49101e-18	0.0132	0.0154	0.0152	0.0152	TRUE	NA
MGG_01892	542	496	167	192	527	493	183	179	345.58	510	181	0.355	-1.495	6.33077e-19	3.65583e-18	0	0.0116	0.0098	0.0098	TRUE	NA
MGG_13275	159	166	6	2	155	165	7	2	82.03	160	4	0.025	-5.299	6.33746e-19	3.65778e-18	0	0.0472	0.0436	0.0436	TRUE	NA
MGG_00810	1198	1235	1831	2088	1166	1227	2010	1944	1586.63	1196	1977	1.652	0.724	6.39763e-19	3.69058e-18	0	0.0029	0.0025	0.0025	TRUE	NA
MGG_00545	76	57	264	323	74	57	290	301	180.27	66	296	4.52	2.176	6.82013e-19	3.93225e-18	0	0.0218	0.0196	0.0196	TRUE	NA
MGG_04541	193	154	430	621	188	153	472	578	347.74	170	525	3.083	1.625	6.98499e-19	4.02521e-18	0.0171	0.0115	0.0122	0.0122	TRUE	NA
MGG_03769	73	74	339	297	71	74	372	277	198.29	72	324	4.479	2.163	7.49463e-19	4.31664e-18	0.0225	0.0198	0.0202	0.0202	TRUE	NA
MGG_16926	725	660	253	310	706	656	278	289	481.9	681	284	0.416	-1.265	7.59952e-19	4.37477e-18	0	0.0084	0.0073	0.0073	TRUE	NA
MGG_12580	1171	1139	1713	2010	1140	1132	1880	1871	1505.68	1136	1876	1.652	0.724	7.88307e-19	4.53564e-18	0	0.003	0.0025	0.0025	TRUE	NA
MGG_08446	2962	2736	3769	4305	2883	2718	4136	4008	3436.42	2800	4072	1.454	0.54	7.99369e-19	4.59689e-18	0.0008	0.0016	0.0015	0.0015	TRUE	NA
MGG_14639	97	95	301	400	94	94	330	372	222.89	94	351	3.725	1.897	8.04263e-19	4.62263e-18	0	0.0177	0.0154	0.0154	TRUE	NA
MGG_09846	767	713	296	325	746	708	325	303	520.57	727	314	0.431	-1.215	8.79529e-19	5.0526e-18	0	0.0079	0.0068	0.0068	TRUE	NA
MGG_04144	2070	1996	1127	1309	2015	1983	1237	1219	1613.32	1999	1228	0.614	-0.703	8.96074e-19	5.14498e-18	0	0.0029	0.0024	0.0024	TRUE	NA
MGG_04432	48474	46032	34558	40494	47176	45734	37928	37703	42134.9	46455	37816	0.814	-0.297	8.99538e-19	5.16218e-18	0.0002	0.0006	0.0005	0.0005	TRUE	NA
MGG_02658	571	576	1088	1135	556	572	1194	1057	844.7	564	1126	1.994	0.996	9.68046e-19	5.55244e-18	0.0033	0.005	0.0048	0.0048	TRUE	NA
MGG_06917	1864	1777	993	1114	1814	1765	1090	1037	1426.65	1790	1064	0.594	-0.752	1.0044e-18	5.758e-18	0	0.0032	0.0027	0.0027	TRUE	NA
MGG_09667	3045	2774	1697	1985	2963	2756	1862	1848	2357.52	2860	1855	0.649	-0.624	1.02003e-18	5.84451e-18	0.0011	0.0021	0.002	0.002	TRUE	NA
MGG_10311	14	6	153	155	14	6	168	144	82.95	10	156	15.885	3.99	1.05307e-18	6.03074e-18	0.0093	0.0467	0.0448	0.0448	TRUE	NA
MGG_06066	3273	2974	1833	2166	3185	2955	2012	2017	2542.12	3070	2014	0.656	-0.608	1.14615e-18	6.5604e-18	0.0012	0.002	0.0019	0.0019	TRUE	NA
MGG_07745	1019	1047	1644	1806	992	1040	1804	1682	1379.43	1016	1743	1.715	0.778	1.18167e-18	6.76016e-18	0.0012	0.0033	0.003	0.003	TRUE	NA
MGG_16096	943	941	424	454	918	935	465	423	685.17	926	444	0.479	-1.063	1.24097e-18	7.09577e-18	0	0.0061	0.0053	0.0053	TRUE	NA
MGG_02159	1174	1116	1694	2001	1143	1109	1859	1863	1493.39	1126	1861	1.653	0.725	1.2525e-18	7.15799e-18	0	0.0031	0.0025	0.0025	TRUE	NA
MGG_08758	77908	75713	57366	66438	75821	75223	62959	61858	68965.3	75522	62408	0.826	-0.275	1.31063e-18	7.48629e-18	0.0001	0.0006	0.0005	0.0005	TRUE	NA
MGG_04752	14224	13138	9502	10846	13843	13053	10428	10098	11855.7	13448	10263	0.763	-0.39	1.40335e-18	8.01177e-18	0.0009	0.0008	0.0009	0.0009	TRUE	NA
MGG_01577	4735	4926	5976	6949	4608	4894	6559	6470	5632.73	4751	6514	1.371	0.455	1.42947e-18	8.1567e-18	0.0006	0.0012	0.0011	0.0011	TRUE	NA
MGG_06440	4886	4382	2851	3370	4755	4354	3129	3138	3843.85	4554	3134	0.688	-0.54	1.43324e-18	8.17397e-18	0.0018	0.0015	0.0015	0.0015	TRUE	NA
MGG_03629	2446	2413	1416	1610	2380	2397	1554	1499	1957.73	2388	1526	0.639	-0.647	1.43597e-18	8.18534e-18	0	0.0025	0.0021	0.0021	TRUE	NA
MGG_04675	1169	1152	542	651	1138	1145	595	606	870.8	1142	600	0.526	-0.926	1.47573e-18	8.40764e-18	0	0.0049	0.0041	0.0041	TRUE	NA
MGG_05671	4297	4396	2740	3210	4182	4368	3007	2989	3636.33	4275	2998	0.701	-0.512	1.50933e-18	8.59461e-18	0	0.0016	0.0013	0.0013	TRUE	NA
MGG_11357	1350	1427	1989	2391	1314	1418	2183	2226	1785.18	1366	2204	1.614	0.691	1.52565e-18	8.68307e-18	0.0007	0.0026	0.0024	0.0024	TRUE	NA
MGG_07602	705	690	197	319	686	686	216	297	471.22	686	256	0.376	-1.413	1.70601e-18	9.7046e-18	0.0194	0.0086	0.0098	0.0098	TRUE	NA
MGG_10466	0	0	1099	1272	0	0	1206	1184	597.62	0	1195	6607.49	12.69	1.83529e-18	1.04346e-17	0	0.0069	0.0062	0.0062	TRUE	NA
MGG_05340	477	478	156	139	464	475	171	129	309.94	470	150	0.319	-1.649	1.8528e-18	1.05288e-17	0.0107	0.0129	0.0126	0.0126	TRUE	NA
MGG_06609	13590	13178	9374	11165	13226	13093	10288	10395	11750.5	13160	10342	0.786	-0.348	1.91073e-18	1.08523e-17	0	0.0008	0.0007	0.0007	TRUE	NA
MGG_07051	757	727	1177	1460	737	722	1292	1359	1027.53	730	1326	1.818	0.862	2.02232e-18	1.14803e-17	0	0.0042	0.0036	0.0036	TRUE	NA
MGG_06177	15490	16255	10811	12967	15075	16150	11865	12073	13790.8	15612	11969	0.767	-0.383	2.15577e-18	1.22315e-17	0.0011	0.0008	0.0008	0.0008	TRUE	NA
MGG_04894	9190	8530	5946	7043	8944	8475	6526	6557	7625.46	8710	6542	0.751	-0.413	2.24662e-18	1.27405e-17	0.0006	0.001	0.0009	0.0009	TRUE	NA
MGG_11284	5	2	131	182	5	2	144	169	80.02	4	156	45.574	5.51	2.2536e-18	1.27735e-17	0	0.0484	0.0446	0.0446	TRUE	NA
MGG_02387	404	388	770	878	393	385	845	817	610.3	389	831	2.135	1.094	2.42993e-18	1.37659e-17	0	0.0068	0.0057	0.0057	TRUE	NA
MGG_01196	2123	2069	1194	1331	2066	2056	1310	1239	1667.85	2061	1274	0.618	-0.694	2.61111e-18	1.47847e-17	0	0.0028	0.0024	0.0024	TRUE	NA
MGG_03492	564	658	196	253	549	654	215	236	413.33	602	226	0.375	-1.414	2.62337e-18	1.48465e-17	0.0083	0.0098	0.0096	0.0096	TRUE	NA
MGG_09505	4307	4236	2741	3135	4192	4209	3008	2919	3581.83	4200	2964	0.705	-0.503	2.66528e-18	1.5076e-17	0	0.0016	0.0013	0.0013	TRUE	NA
MGG_11270	963	926	418	487	937	920	459	453	692.35	928	456	0.491	-1.026	2.68691e-18	1.51905e-17	0	0.006	0.005	0.005	TRUE	NA
MGG_04806	1341	1198	1842	2246	1305	1190	2022	2091	1652.02	1248	2056	1.648	0.721	2.70857e-18	1.53052e-17	0.0015	0.0028	0.0026	0.0026	TRUE	NA
MGG_11289	583	547	168	240	567	543	184	223	379.67	555	204	0.368	-1.442	2.98201e-18	1.68417e-17	0.0029	0.0106	0.0098	0.0098	TRUE	NA
MGG_02114	46	28	225	228	45	28	247	212	132.95	36	230	6.314	2.659	3.02739e-18	1.70892e-17	0.0255	0.0293	0.029	0.029	TRUE	NA
MGG_06778	378	290	66	90	368	288	72	84	203.06	328	78	0.239	-2.067	3.13907e-18	1.77106e-17	0.0175	0.0194	0.0191	0.0191	TRUE	NA
MGG_16696	1	1	488	517	1	1	536	481	254.73	1	508	516.847	9.014	3.24661e-18	1.8308e-17	0	0.0155	0.0144	0.0144	TRUE	NA
MGG_06661	447	487	145	161	435	484	159	150	306.98	460	154	0.336	-1.573	3.30088e-18	1.86045e-17	0	0.013	0.0114	0.0114	TRUE	NA
MGG_08725	141769	144813	155232	187074	137972	143875	170368	174178	156598	140924	172273	1.222	0.29	3.5024e-18	1.97303e-17	0.0005	0.0005	0.0005	0.0005	TRUE	NA
MGG_13404	452	471	145	159	440	468	159	148	303.75	454	154	0.338	-1.565	3.62776e-18	2.0426e-17	0	0.0131	0.0112	0.0112	TRUE	NA
MGG_07794	46	70	233	350	45	70	256	326	173.98	58	291	5.099	2.35	3.70151e-18	2.08306e-17	0.0451	0.0225	0.0248	0.0248	TRUE	NA
MGG_05131	1501	1450	2088	2423	1461	1441	2292	2256	1862.24	1451	2274	1.567	0.648	3.71094e-18	2.08731e-17	0	0.0026	0.0021	0.0021	TRUE	NA
MGG_13349	112	124	376	395	109	123	413	368	253.16	116	390	3.359	1.748	3.74932e-18	2.10782e-17	0	0.0156	0.0139	0.0139	TRUE	NA
MGG_16339	4	3	142	159	4	3	156	148	77.69	4	152	44.147	5.464	3.85352e-18	2.1653e-17	0	0.0498	0.044	0.044	TRUE	NA
MGG_02205	3	1	204	203	3	1	224	189	104.2	2	206	104.925	6.713	3.86412e-18	2.17016e-17	0	0.0373	0.0347	0.0347	TRUE	NA
MGG_06544	1780	1835	923	1168	1732	1823	1013	1087	1413.98	1778	1050	0.591	-0.758	3.89011e-18	2.18364e-17	0.0011	0.0032	0.0029	0.0029	TRUE	NA
MGG_06775	671	598	1113	1241	653	594	1222	1155	906.03	624	1188	1.905	0.93	3.91931e-18	2.19891e-17	0.0015	0.0047	0.0043	0.0043	TRUE	NA
MGG_00079	14	23	146	203	14	23	160	189	96.43	18	174	9.598	3.263	4.19163e-18	2.35051e-17	0.0124	0.0402	0.0381	0.0381	TRUE	NA
MGG_01755	1733	1733	951	1019	1687	1722	1044	949	1350.21	1704	996	0.584	-0.776	4.43967e-18	2.48834e-17	0.0012	0.0033	0.0031	0.0031	TRUE	NA
MGG_07728	717	757	303	306	698	752	333	285	516.83	725	309	0.425	-1.234	4.60282e-18	2.57847e-17	0.004	0.0079	0.0074	0.0074	TRUE	NA
MGG_04167	6375	5834	7414	8623	6204	5796	8137	8029	7041.48	6000	8083	1.347	0.43	4.62201e-18	2.5879e-17	0.0009	0.001	0.001	0.001	TRUE	NA
MGG_04470	986	913	362	508	960	907	397	473	684.24	934	435	0.467	-1.098	4.74428e-18	2.65502e-17	0.0056	0.0061	0.006	0.006	TRUE	NA
MGG_16704	692	606	1092	1304	673	602	1198	1214	922.03	638	1206	1.891	0.919	4.94055e-18	2.76346e-17	0.0012	0.0047	0.0042	0.0042	TRUE	NA
MGG_11418	3541	3445	2193	2448	3446	3423	2407	2279	2888.73	3434	2343	0.682	-0.552	5.02344e-18	2.8084e-17	0.0003	0.0018	0.0016	0.0016	TRUE	NA
MGG_01683	1959	1943	1092	1247	1907	1930	1198	1161	1549.11	1918	1180	0.615	-0.702	5.32944e-18	2.97796e-17	0	0.003	0.0025	0.0025	TRUE	NA
MGG_10692	244	199	1171	1002	237	198	1285	933	663.32	218	1109	5.095	2.349	5.3671e-18	2.99749e-17	0.0328	0.0063	0.0098	0.0328	TRUE	NA
MGG_13584	2	6	140	150	2	6	154	140	75.3	4	147	37.238	5.219	5.8876e-18	3.28653e-17	0.0003	0.0514	0.0471	0.0471	TRUE	NA
MGG_11652	93	120	362	382	91	119	397	356	240.67	105	376	3.59	1.844	5.93989e-18	3.31404e-17	0.0111	0.0164	0.0159	0.0159	TRUE	NA
MGG_01248	2774	2641	1473	1915	2700	2624	1617	1783	2180.8	2662	1700	0.639	-0.646	6.08254e-18	3.39192e-17	0.0016	0.0023	0.0022	0.0022	TRUE	NA
MGG_07406	1036	883	425	437	1008	877	466	407	689.71	942	436	0.462	-1.113	6.16207e-18	3.43453e-17	0.0079	0.0061	0.0063	0.0063	TRUE	NA
MGG_05160	883	873	1387	1577	859	867	1522	1468	1179.3	863	1495	1.732	0.792	6.25144e-18	3.48258e-17	0	0.0037	0.0031	0.0031	TRUE	NA
MGG_07954	111	107	357	371	108	106	392	345	237.89	107	368	3.437	1.781	6.40601e-18	3.56689e-17	0	0.0166	0.0145	0.0145	TRUE	NA
MGG_15565	1450	1597	2265	2539	1411	1587	2486	2364	1961.91	1499	2425	1.618	0.694	6.63109e-18	3.69036e-17	0.003	0.0024	0.0026	0.0026	TRUE	NA
MGG_04194	524	509	919	1058	510	506	1009	985	752.33	508	997	1.963	0.973	6.75056e-18	3.75496e-17	0	0.0056	0.0046	0.0046	TRUE	NA
MGG_04569	51702	49796	55978	64329	50317	49473	61436	59895	55280.3	49895	60666	1.216	0.282	6.86523e-18	3.81682e-17	0.0002	0.0006	0.0005	0.0005	TRUE	NA
MGG_00246	2302	2276	1334	1504	2240	2261	1464	1400	1841.5	2250	1432	0.636	-0.653	6.92853e-18	3.85007e-17	0	0.0026	0.0022	0.0022	TRUE	NA
MGG_17915	22	25	166	191	21	25	182	178	101.57	23	180	7.787	2.961	7.39321e-18	4.10623e-17	0	0.0382	0.0328	0.0328	TRUE	NA
MGG_00400	2730	2943	1545	1970	2657	2924	1696	1834	2277.66	2790	1765	0.633	-0.66	7.43603e-18	4.12793e-17	0.0034	0.0022	0.0024	0.0024	TRUE	NA
MGG_00503	2010	2031	2730	3144	1956	2018	2996	2927	2474.36	1987	2962	1.49	0.576	7.49943e-18	4.16103e-17	0	0.002	0.0017	0.0017	TRUE	NA
MGG_11876	1097	1014	1613	1836	1068	1007	1770	1709	1388.69	1038	1740	1.676	0.745	7.51467e-18	4.1674e-17	0	0.0033	0.0028	0.0028	TRUE	NA
MGG_14988	37	24	168	251	36	24	184	234	119.48	30	209	6.986	2.805	7.8154e-18	4.332e-17	0.0292	0.0326	0.0322	0.0322	TRUE	NA
MGG_02032	1191	1141	1726	1983	1159	1134	1894	1846	1508.32	1146	1870	1.631	0.706	8.20924e-18	4.54802e-17	0	0.003	0.0025	0.0025	TRUE	NA
MGG_14901	1349	1266	1940	2166	1313	1258	2129	2017	1679.13	1286	2073	1.612	0.689	8.69116e-18	4.81259e-17	0	0.0028	0.0025	0.0025	TRUE	NA
MGG_00391	167	158	401	517	163	157	440	481	310.24	160	460	2.886	1.529	8.84264e-18	4.89402e-17	0	0.0128	0.0111	0.0111	TRUE	NA
MGG_16886	614	536	1026	1155	598	533	1126	1075	832.88	566	1100	1.947	0.961	9.0878e-18	5.02719e-17	0.0019	0.0051	0.0047	0.0047	TRUE	NA
MGG_00299	852	785	330	412	829	780	362	384	588.72	804	373	0.464	-1.108	9.22566e-18	5.09834e-17	0	0.007	0.006	0.006	TRUE	NA
MGG_03765	572	563	207	225	557	559	227	209	388.18	558	218	0.391	-1.355	9.22156e-18	5.09834e-17	0	0.0104	0.0088	0.0088	TRUE	NA
[truncated: 11,471 more rows]

## Sheet: Hisat2_DEseq_sig
Id	Control-1	Control-2	Treat-1	Treat-2	norm.control-1	norm.control-2	norm.Treat-1	norm.Treat-2	baseMean	Control	Treat	FoldChange	log2FoldChange	pvalue	padj	dispGeneEst	dispFit	dispMAP	dispersion	betaConv	maxCooks
MGG_18138	1920	1937	803	929	1869	1924	881	865	1384.82	1896	873	0.46	-1.119	1.80108e-38	1.62819e-37	0	0.0033	0.0027	0.0027	TRUE	NA
MGG_18137	13	15	2	2	13	15	2	2	7.9	14	2	0.147	-2.769	0.0207453	0.0380496	0	0.4853	0.4031	0.4031	TRUE	NA
MGG_18135	1216	1195	721	758	1183	1187	791	706	966.93	1185	748	0.631	-0.665	1.56764e-10	6.29737e-10	0.0016	0.0045	0.0041	0.0041	TRUE	NA
MGG_18134	930	892	478	444	905	886	525	413	682.33	896	469	0.522	-0.937	1.37359e-12	6.15579e-12	0.0109	0.0061	0.0068	0.0068	TRUE	NA
MGG_18118	133	113	11983	13462	129	112	13151	12534	6481.77	120	12842	106.184	6.73	0	0	0	0.0011	0.0011	0.0011	TRUE	NA
MGG_18099	60531	61529	48459	57247	58910	61130	53184	53301	56631.2	60020	53242	0.887	-0.173	2.24465e-07	7.4042e-07	0.0003	0.0006	0.0005	0.0005	TRUE	NA
MGG_18072	13	14	1	1	13	14	1	1	7.15	14	1	0.076	-3.717	0.00956093	0.0187969	0	0.5366	0.4517	0.4517	TRUE	NA
MGG_18057	3256	3265	3570	4092	3169	3244	3918	3810	3535.16	3206	3864	1.205	0.269	3.78659e-06	1.11876e-05	0	0.0016	0.0013	0.0013	TRUE	NA
MGG_18056	2	3	11	18	2	3	12	17	8.44	2	14	5.87	2.553	0.0243015	0.0439664	0	0.4545	0.3826	0.3826	TRUE	NA
MGG_18055	1	0	6	17	1	0	7	16	5.85	0	12	22.918	4.518	0.0147551	0.0279061	0	0.6558	0.6094	0.6094	TRUE	NA
MGG_18046	107	63	25	44	104	63	27	41	58.78	84	34	0.412	-1.279	0.00299232	0.00638519	0.0859	0.0657	0.0685	0.0685	TRUE	NA
MGG_18043	3	5	24	21	3	5	26	20	13.44	4	23	5.816	2.54	0.004969	0.0102584	0	0.2855	0.2459	0.2459	TRUE	NA
MGG_18035	86	104	518	609	84	103	569	567	330.64	94	568	6.075	2.603	1.7631e-43	1.72975e-42	0	0.0121	0.0109	0.0109	TRUE	NA
MGG_18021	286	388	546	736	278	385	599	685	487.08	332	642	1.937	0.954	6.64923e-09	2.42263e-08	0.026	0.0084	0.0107	0.0107	TRUE	NA
MGG_18017	1766	1701	1848	2196	1719	1690	2028	2045	1870.37	1704	2036	1.195	0.257	0.000524726	0.00123913	0	0.0025	0.0021	0.0021	TRUE	NA
MGG_18016	152	169	1130	1288	148	168	1240	1199	688.81	158	1220	7.725	2.95	6.79393e-104	1.28735e-102	0	0.0061	0.0054	0.0054	TRUE	NA
MGG_18003	12222	11862	9491	11205	11895	11785	10416	10433	11132.2	11840	10424	0.88	-0.184	4.39318e-06	1.29073e-05	0	0.0008	0.0007	0.0007	TRUE	NA
MGG_17999	5	5	18	23	5	5	20	21	12.75	5	20	4.189	2.067	0.0190695	0.0352393	0	0.301	0.2488	0.2488	TRUE	NA
MGG_17984	4	1	15	29	4	1	16	27	12.09	2	22	8.888	3.152	0.00240733	0.00519106	0	0.3175	0.2944	0.2944	TRUE	NA
MGG_17982	3339	3047	2298	2601	3250	3027	2522	2422	2805.15	3138	2472	0.787	-0.345	2.45387e-07	8.06783e-07	0.0014	0.0019	0.0018	0.0018	TRUE	NA
MGG_17978	294	238	155	216	286	236	170	201	223.45	261	186	0.711	-0.491	0.019994	0.0367817	0.0117	0.0176	0.0168	0.0168	TRUE	NA
MGG_17976	645	642	329	448	628	638	361	417	510.94	633	389	0.616	-0.699	5.2353e-07	1.67587e-06	0.002	0.008	0.0073	0.0073	TRUE	NA
MGG_17962	9149	8723	3030	3499	8904	8666	3325	3258	6038.41	8785	3292	0.375	-1.417	1.10713e-179	3.65088e-178	0	0.0011	0.001	0.001	TRUE	NA
MGG_17961	1037	1116	3762	4505	1009	1109	4129	4194	2610.31	1059	4162	3.931	1.975	1.13445e-168	3.57044e-167	0.0011	0.002	0.0019	0.0019	TRUE	NA
MGG_17953	1513	1491	2028	2357	1472	1481	2226	2195	1843.52	1476	2210	1.496	0.581	7.33339e-15	3.64919e-14	0	0.0026	0.0021	0.0021	TRUE	NA
MGG_17945	535	454	309	363	521	451	339	338	412.21	486	338	0.697	-0.521	0.00070045	0.00162424	0.0032	0.0098	0.0089	0.0089	TRUE	NA
MGG_17939	1685	1754	2036	2614	1640	1743	2235	2434	2012.71	1692	2334	1.381	0.466	1.94731e-09	7.32806e-09	0.0023	0.0024	0.0024	0.0024	TRUE	NA
MGG_17937	10	9	38	34	10	9	42	32	23.01	10	37	3.921	1.971	0.00277271	0.00593838	0	0.167	0.142	0.142	TRUE	NA
MGG_17936	466	450	130	141	454	447	143	131	293.64	450	137	0.304	-1.719	9.12029e-21	5.56026e-20	0	0.0135	0.0115	0.0115	TRUE	NA
MGG_17930	135	181	86	80	131	180	94	74	120.02	156	84	0.541	-0.885	0.00255394	0.00549218	0.0308	0.0324	0.0322	0.0322	TRUE	NA
MGG_17928	114	114	276	255	111	113	303	237	191.14	112	270	2.406	1.267	4.22209e-08	1.46349e-07	0.013	0.0205	0.0194	0.0194	TRUE	NA
MGG_17926	22	10	95	97	21	10	104	90	56.48	16	97	6.191	2.63	1.41471e-08	5.04954e-08	0.0423	0.0683	0.0668	0.0668	TRUE	NA
MGG_17915	22	25	166	191	21	25	182	178	101.57	23	180	7.787	2.961	7.39321e-18	4.10623e-17	0	0.0382	0.0328	0.0328	TRUE	NA
MGG_17909	1371	1418	1485	1732	1334	1409	1630	1613	1496.37	1372	1622	1.182	0.241	0.00356611	0.00751236	0	0.0031	0.0026	0.0026	TRUE	NA
MGG_17908	399	481	590	689	388	478	648	642	538.81	433	645	1.488	0.574	4.87979e-05	0.00012974	0.0081	0.0076	0.0077	0.0077	TRUE	NA
MGG_17900	2273	2304	1414	1597	2212	2289	1552	1487	1884.99	2250	1520	0.675	-0.567	5.63681e-14	2.70151e-13	0	0.0025	0.0022	0.0022	TRUE	NA
MGG_17890	16	24	81	105	16	24	89	98	56.52	20	94	4.743	2.246	2.55037e-07	8.3826e-07	0	0.0683	0.0608	0.0608	TRUE	NA
MGG_17889	294	267	142	188	286	265	156	175	220.57	276	166	0.601	-0.735	0.000343125	0.000830158	0	0.0179	0.0154	0.0154	TRUE	NA
MGG_17884	805	885	1867	1989	783	879	2049	1852	1390.91	831	1950	2.345	1.23	2.5825e-38	2.32699e-37	0.005	0.0033	0.0035	0.0035	TRUE	NA
MGG_17881	13	15	36	45	13	15	40	42	27.24	14	41	2.957	1.564	0.00774818	0.0155034	0	0.1411	0.1176	0.1176	TRUE	NA
MGG_17879	130	110	323	375	127	109	354	349	234.86	118	352	2.983	1.577	1.32327e-14	6.51432e-14	0	0.0168	0.0145	0.0145	TRUE	NA
MGG_17878	1013	1044	680	903	986	1037	746	841	902.54	1012	794	0.785	-0.349	0.00125084	0.00281655	0.0028	0.0047	0.0045	0.0045	TRUE	NA
MGG_17877	1925	1984	2105	2462	1873	1971	2310	2292	2111.78	1922	2301	1.197	0.26	0.000291317	0.000709632	0	0.0023	0.002	0.002	TRUE	NA
MGG_17865	180	186	83	111	175	185	91	103	138.6	180	97	0.541	-0.886	0.000570475	0.00134115	0	0.0281	0.0239	0.0239	TRUE	NA
MGG_17864	375	410	156	207	365	407	171	193	284.06	386	182	0.472	-1.083	5.13429e-09	1.88621e-08	0	0.014	0.0125	0.0125	TRUE	NA
MGG_17862	2576	2178	2956	3447	2507	2164	3244	3209	2781.12	2336	3226	1.381	0.466	4.05041e-10	1.58445e-09	0.0047	0.0019	0.0023	0.0023	TRUE	NA
MGG_17861	4209	4298	6514	7551	4096	4270	7149	7030	5636.51	4183	7090	1.695	0.761	1.97735e-51	2.19978e-50	0.0002	0.0012	0.001	0.001	TRUE	NA
MGG_17860	286	255	441	560	278	253	484	521	384.27	266	502	1.892	0.92	5.86907e-09	2.14616e-08	0	0.0105	0.0091	0.0091	TRUE	NA
MGG_17858	273	205	88	92	266	204	97	86	162.9	235	92	0.388	-1.367	6.58672e-08	2.25763e-07	0.018	0.024	0.0231	0.0231	TRUE	NA
MGG_17848	3252	3404	2417	3190	3165	3382	2653	2970	3042.4	3274	2812	0.859	-0.218	0.00199919	0.00436551	0.0036	0.0018	0.0021	0.0021	TRUE	NA
MGG_17841	2688	2738	2690	3170	2616	2720	2952	2951	2810.01	2668	2952	1.106	0.146	0.0215197	0.0393655	0	0.0019	0.0016	0.0016	TRUE	NA
MGG_17840	17	24	6	1	17	24	7	1	11.98	20	4	0.181	-2.468	0.0136815	0.0260361	0.2909	0.3204	0.3184	0.3184	TRUE	NA
MGG_17830	3623	3560	2453	2773	3526	3537	2692	2582	3084.23	3532	2637	0.746	-0.422	6.85048e-12	2.9759e-11	0	0.0017	0.0015	0.0015	TRUE	NA
MGG_17829	1161	999	410	483	1130	993	450	450	755.53	1062	450	0.424	-1.238	4.25197e-25	2.92111e-24	0.0038	0.0056	0.0053	0.0053	TRUE	NA
MGG_17825	113	84	31	53	110	83	34	49	69.2	96	42	0.433	-1.208	0.00156445	0.00347247	0.0331	0.0559	0.0529	0.0529	TRUE	NA
MGG_17823	1239	1253	794	925	1206	1245	871	861	1045.84	1226	866	0.707	-0.5	2.03584e-07	6.73148e-07	0	0.0042	0.0035	0.0035	TRUE	NA
MGG_17821	1106	1035	592	666	1076	1028	650	620	843.62	1052	635	0.603	-0.73	1.2314e-11	5.26034e-11	0	0.005	0.0043	0.0043	TRUE	NA
MGG_17820	3622	3501	1719	2063	3525	3478	1887	1921	2702.67	3502	1904	0.544	-0.879	2.10227e-42	2.01946e-41	0	0.0019	0.0016	0.0016	TRUE	NA
MGG_17817	343	352	224	280	334	350	246	261	297.52	342	254	0.742	-0.431	0.0135731	0.0258521	0	0.0134	0.0112	0.0112	TRUE	NA
MGG_17816	485	494	693	856	472	491	761	797	630.09	482	779	1.618	0.695	1.50922e-08	5.38164e-08	0	0.0066	0.0056	0.0056	TRUE	NA
MGG_17813	2028	1946	4140	4922	1974	1933	4544	4583	3258.36	1954	4564	2.336	1.224	1.98452e-91	3.43621e-90	0	0.0017	0.0014	0.0014	TRUE	NA
MGG_17811	213	210	62	59	207	209	68	55	134.73	208	62	0.295	-1.763	1.03402e-10	4.19339e-10	0	0.0289	0.0251	0.0251	TRUE	NA
MGG_17810	949	812	130	138	924	807	143	128	500.37	866	136	0.156	-2.677	1.30268e-63	1.70102e-62	0	0.0082	0.0078	0.0078	TRUE	NA
MGG_17807	0	3	15	15	0	3	16	14	8.35	2	15	10.264	3.359	0.00928539	0.0183105	0	0.4592	0.436	0.436	TRUE	NA
MGG_17803	644	583	845	1030	627	579	927	959	773.09	603	943	1.564	0.646	9.86642e-09	3.54915e-08	0	0.0055	0.0047	0.0047	TRUE	NA
MGG_17802	10937	10700	8265	9797	10644	10631	9071	9122	9866.81	10638	9096	0.855	-0.226	4.18263e-08	1.45072e-07	0	0.0009	0.0007	0.0007	TRUE	NA
MGG_17794	146	137	564	603	142	136	619	561	364.66	139	590	4.24	2.084	3.67895e-34	3.09295e-33	0	0.011	0.0097	0.0097	TRUE	NA
MGG_17792	3762	3399	4680	5225	3661	3377	5136	4865	4259.84	3519	5000	1.421	0.506	4.14387e-17	2.2385e-16	0.0019	0.0014	0.0015	0.0015	TRUE	NA
MGG_17784	35	33	53	90	34	33	58	84	52.2	34	71	2.129	1.09	0.0108913	0.0211825	0	0.0739	0.0663	0.0663	TRUE	NA
MGG_17777	138	127	33	32	134	126	36	30	81.62	130	33	0.253	-1.985	1.79802e-08	6.37648e-08	0	0.0474	0.0406	0.0406	TRUE	NA
MGG_17771	13	15	0	0	13	15	0	0	6.89	14	0	0.013	-6.211	0.000544549	0.00128402	0	0.5567	0.5145	0.5145	TRUE	NA
MGG_17765	0	0	28	29	0	0	31	27	14.43	0	29	159.482	7.317	6.27255e-06	1.8168e-05	0	0.266	0.2433	0.2433	TRUE	NA
MGG_17764	62	42	108	112	60	42	119	104	81.22	51	112	2.18	1.124	0.00121437	0.00273836	0.0149	0.0477	0.0438	0.0438	TRUE	NA
MGG_17744	23	10	108	79	22	10	119	74	56.1	16	96	5.919	2.565	1.20293e-07	4.04283e-07	0.1506	0.0688	0.0772	0.0772	TRUE	NA
MGG_17743	2254	2028	3321	3753	2194	2015	3645	3494	2836.9	2104	3570	1.696	0.762	2.83015e-29	2.15321e-28	0.0015	0.0018	0.0018	0.0018	TRUE	NA
MGG_17732	1611	1556	2228	2647	1568	1546	2445	2465	2005.88	1557	2455	1.577	0.657	9.17248e-20	5.43316e-19	0	0.0024	0.002	0.002	TRUE	NA
MGG_17731	28	40	102	126	27	40	112	117	74.06	34	114	3.426	1.776	1.59625e-06	4.8969e-06	0	0.0522	0.0467	0.0467	TRUE	NA
MGG_17730	480	491	560	625	467	488	615	582	537.87	478	598	1.252	0.325	0.0136789	0.0260356	0	0.0076	0.0065	0.0065	TRUE	NA
MGG_17729	18	17	217	355	18	17	238	331	150.77	18	284	16.551	4.049	1.03146e-31	8.28697e-31	0	0.0259	0.027	0.027	TRUE	NA
MGG_17713	2114	2206	3487	3894	2057	2192	3827	3626	2925.41	2124	3726	1.754	0.81	1.89832e-34	1.60818e-33	0.0013	0.0018	0.0017	0.0017	TRUE	NA
MGG_17708	1652	1720	1180	1466	1608	1709	1295	1365	1494.15	1658	1330	0.802	-0.318	0.000171988	0.000430146	0.001	0.0031	0.0028	0.0028	TRUE	NA
MGG_17701	173	145	86	95	168	144	94	88	123.82	156	91	0.585	-0.774	0.00453217	0.00940048	0	0.0314	0.0271	0.0271	TRUE	NA
MGG_17699	753	750	423	389	733	745	464	362	576.1	739	413	0.558	-0.842	2.95756e-09	1.10305e-08	0.0115	0.0071	0.0078	0.0078	TRUE	NA
MGG_17698	893	834	556	607	869	829	610	565	718.26	849	588	0.692	-0.532	5.09467e-06	1.48812e-05	0	0.0058	0.0051	0.0051	TRUE	NA
MGG_17697	2835	2599	1678	1917	2759	2582	1842	1785	2241.92	2670	1814	0.679	-0.559	7.44487e-15	3.70299e-14	0.001	0.0022	0.002	0.002	TRUE	NA
MGG_17696	664	602	297	263	646	598	326	245	453.79	622	286	0.457	-1.129	2.6625e-12	1.17604e-11	0.0166	0.0089	0.0099	0.0099	TRUE	NA
MGG_17695	3462	3131	2024	2295	3369	3111	2221	2137	2709.53	3240	2179	0.672	-0.573	6.72437e-17	3.59904e-16	0.0017	0.0019	0.0019	0.0019	TRUE	NA
MGG_17694	1237	1318	855	1028	1204	1309	938	957	1102.21	1256	948	0.754	-0.407	2.542e-05	6.96985e-05	0.0011	0.004	0.0036	0.0036	TRUE	NA
MGG_17690	602	626	426	540	586	622	468	503	544.53	604	486	0.804	-0.315	0.0171599	0.0320428	0	0.0075	0.0065	0.0065	TRUE	NA
MGG_17680	242	277	334	422	236	275	367	393	317.55	256	380	1.488	0.574	0.000996793	0.00227324	0.0032	0.0126	0.0113	0.0113	TRUE	NA
MGG_17679	28773	28588	12011	14047	28002	28403	13182	13079	20666.5	28202	13130	0.466	-1.103	2.84672e-209	1.07698e-207	0	0.0007	0.0006	0.0006	TRUE	NA
MGG_17678	9227	9145	4988	5922	8980	9086	5474	5514	7263.43	9033	5494	0.608	-0.717	1.28845e-56	1.55557e-55	0	0.001	0.0008	0.0008	TRUE	NA
MGG_17677	101434	99250	38188	44649	98717	98607	41911	41571	70201.6	98662	41741	0.423	-1.241	0	0	0	0.0006	0.0004	0.0004	TRUE	NA
MGG_17668	416	405	291	324	405	402	319	302	357.07	404	310	0.769	-0.379	0.0174397	0.032494	0	0.0112	0.0094	0.0094	TRUE	NA
MGG_17652	346	418	175	272	337	415	192	253	299.33	376	222	0.594	-0.752	0.000128055	0.000324008	0.0257	0.0133	0.0149	0.0149	TRUE	NA
MGG_17644	156	156	71	92	152	155	78	86	117.6	154	82	0.534	-0.906	0.00110693	0.00251301	0	0.0331	0.0276	0.0276	TRUE	NA
MGG_17634	368	383	420	581	358	381	461	541	435.14	370	501	1.358	0.442	0.00364211	0.00765786	0.0054	0.0093	0.0087	0.0087	TRUE	NA
MGG_17632	2825	3168	2185	2856	2749	3147	2398	2659	2738.49	2948	2528	0.858	-0.221	0.00501435	0.0103461	0.0065	0.0019	0.0026	0.0026	TRUE	NA
MGG_17623	66	49	11	24	64	49	12	22	36.83	56	17	0.308	-1.701	0.00138503	0.00309787	0.0472	0.1045	0.0981	0.0981	TRUE	NA
MGG_17622	48	55	14	13	47	55	15	12	32.21	51	14	0.27	-1.889	0.000672007	0.00156354	0	0.1195	0.1016	0.1016	TRUE	NA
MGG_17618	4052	3835	3241	3557	3943	3810	3557	3312	3655.61	3876	3434	0.885	-0.176	0.00390164	0.00818018	0.0013	0.0015	0.0015	0.0015	TRUE	NA
MGG_17617	1749	1423	917	1194	1702	1414	1006	1112	1308.51	1558	1059	0.68	-0.556	9.35345e-08	3.16374e-07	0.0094	0.0034	0.0044	0.0044	TRUE	NA
MGG_17610	827	699	367	419	805	694	403	390	573.05	750	396	0.529	-0.92	9.55251e-12	4.1029e-11	0.0048	0.0072	0.0068	0.0068	TRUE	NA
MGG_17606	333	326	149	197	324	324	164	183	248.73	324	174	0.536	-0.899	3.33937e-06	9.91669e-06	0	0.0159	0.0135	0.0135	TRUE	NA
MGG_17596	2284	2203	1053	1244	2223	2189	1156	1158	1681.37	2206	1157	0.525	-0.931	1.65967e-32	1.34911e-31	0	0.0028	0.0023	0.0023	TRUE	NA
MGG_17595	12633	11929	8136	9699	12295	11852	8929	9030	10526.5	12074	8980	0.744	-0.427	5.17869e-24	3.45673e-23	0.0003	0.0009	0.0008	0.0008	TRUE	NA
MGG_17543	12	16	31	50	12	16	34	47	27.04	14	40	2.93	1.551	0.00957361	0.0188151	0	0.1422	0.1239	0.1239	TRUE	NA
MGG_17542	2535	2306	1883	2266	2467	2291	2067	2110	2233.64	2379	2088	0.878	-0.188	0.00901493	0.0178313	0.0011	0.0022	0.002	0.002	TRUE	NA
MGG_17540	551	496	1388	1747	536	493	1523	1627	1044.73	514	1575	3.062	1.614	2.12682e-55	2.52363e-54	0.0015	0.0042	0.0038	0.0038	TRUE	NA
MGG_17538	1954	2008	693	836	1902	1995	761	778	1358.9	1948	770	0.395	-1.34	9.2992e-52	1.04081e-50	0	0.0033	0.0029	0.0029	TRUE	NA
MGG_17536	348	316	465	530	339	314	510	493	414.11	326	502	1.538	0.621	3.46272e-05	9.36188e-05	0	0.0097	0.0083	0.0083	TRUE	NA
MGG_17535	212	191	505	628	206	190	554	585	383.76	198	570	2.876	1.524	2.2096e-21	1.37209e-20	0	0.0105	0.009	0.009	TRUE	NA
MGG_17533	745	767	973	1181	725	762	1068	1100	913.63	744	1084	1.458	0.544	1.32372e-07	4.43662e-07	0	0.0047	0.004	0.004	TRUE	NA
MGG_17532	2365	2430	2817	3455	2302	2414	3092	3217	2756.1	2358	3154	1.338	0.42	1.37704e-10	5.55391e-10	0.0006	0.0019	0.0017	0.0017	TRUE	NA
MGG_17531	43627	44504	64041	78646	42458	44216	70285	73225	57546	43337	71755	1.656	0.728	4.02758e-90	6.85557e-89	0.0008	0.0006	0.0006	0.0006	TRUE	NA
MGG_17528	694	666	2733	3388	675	662	2999	3154	1872.76	668	3076	4.603	2.203	2.03109e-163	6.23262e-162	0	0.0025	0.0022	0.0022	TRUE	NA
MGG_17522	33	23	59	112	32	23	65	104	56	28	84	3.082	1.624	0.000219462	0.000541401	0.0689	0.0689	0.0689	0.0689	TRUE	NA
MGG_17514	1792	1785	868	923	1744	1773	953	859	1332.36	1758	906	0.515	-0.959	4.39851e-26	3.11277e-25	0.0013	0.0034	0.0031	0.0031	TRUE	NA
MGG_17513	17203	16874	5060	6027	16742	16765	5553	5612	11168	16754	5582	0.333	-1.585	0	0	0	0.0008	0.0007	0.0007	TRUE	NA
MGG_17509	2	5	18	21	2	5	20	20	11.56	4	20	5.698	2.51	0.0100652	0.0197102	0	0.3321	0.2888	0.2888	TRUE	NA
MGG_17504	8411	7877	8585	9969	8186	7826	9422	9282	8678.88	8006	9352	1.168	0.224	6.07448e-07	1.9333e-06	0.0003	0.0009	0.0009	0.0009	TRUE	NA
MGG_17503	30	28	693	846	29	28	761	788	401.32	28	774	27.155	4.763	1.18353e-90	2.02705e-89	0	0.01	0.0088	0.0088	TRUE	NA
MGG_17492	1046	931	1275	1543	1018	925	1399	1437	1194.73	972	1418	1.46	0.546	6.45871e-09	2.3571e-08	0.0013	0.0037	0.0034	0.0034	TRUE	NA
MGG_17480	0	0	14	23	0	0	15	21	9.19	0	18	101.842	6.67	0.000102174	0.000262187	0	0.4172	0.3885	0.3885	TRUE	NA
MGG_17477	21	27	52	56	20	27	57	52	39.12	24	54	2.31	1.208	0.0130377	0.0249398	0	0.0984	0.0837	0.0837	TRUE	NA
MGG_17476	1057	993	2046	2395	1029	987	2245	2230	1622.66	1008	2238	2.221	1.151	3.28441e-46	3.36576e-45	0	0.0029	0.0024	0.0024	TRUE	NA
MGG_17472	1339	1267	480	554	1303	1259	527	516	901.13	1281	522	0.407	-1.297	9.56098e-35	8.14342e-34	0	0.0047	0.004	0.004	TRUE	NA
MGG_17468	3	1	20	10	3	1	22	9	8.79	2	16	7.93	2.987	0.0126869	0.0243701	0	0.4362	0.407	0.407	TRUE	NA
MGG_17465	48	44	6	8	47	44	7	7	26.12	46	7	0.156	-2.684	4.32334e-05	0.000115726	0	0.1472	0.1243	0.1243	TRUE	NA
MGG_17464	107	133	42	38	104	132	46	35	79.44	118	40	0.344	-1.541	1.54996e-05	4.34139e-05	0	0.0487	0.0445	0.0445	TRUE	NA
MGG_17458	145	140	183	230	141	139	201	214	173.8	140	208	1.482	0.567	0.0124016	0.0238802	0	0.0225	0.0188	0.0188	TRUE	NA
MGG_17456	321	372	474	612	312	370	520	570	443.01	341	545	1.6	0.678	8.44383e-06	2.41906e-05	0.0062	0.0091	0.0088	0.0088	TRUE	NA
MGG_17455	9496	8183	10684	11755	9242	8130	11726	10945	10010.5	8686	11336	1.305	0.384	0.000217227	0.000536186	0.0051	0.0009	0.0015	0.0051	TRUE	NA
MGG_17453	3101	3095	2075	2355	3018	3075	2277	2193	2640.72	3046	2235	0.733	-0.447	7.26139e-12	3.14575e-11	0	0.0019	0.0017	0.0017	TRUE	NA
MGG_17450	2678	2606	1327	1757	2606	2589	1456	1636	2071.91	2598	1546	0.596	-0.747	6.12336e-22	3.8544e-21	0.0023	0.0023	0.0024	0.0024	TRUE	NA
MGG_17449	1285	1347	889	954	1251	1338	976	888	1113.19	1294	932	0.719	-0.475	1.32408e-06	4.09494e-06	0.0023	0.0039	0.0037	0.0037	TRUE	NA
MGG_17442	2695	2566	2779	3302	2623	2549	3050	3074	2824.13	2586	3062	1.184	0.244	0.000106844	0.000273282	0	0.0019	0.0015	0.0015	TRUE	NA
MGG_17441	8	16	50	89	8	16	55	83	40.36	12	69	5.839	2.546	3.30309e-06	9.81948e-06	0.0913	0.0954	0.095	0.095	TRUE	NA
MGG_17439	5153	4636	2498	2718	5015	4606	2742	2531	3723.28	4810	2636	0.548	-0.869	3.21756e-40	2.97941e-39	0.0028	0.0015	0.0018	0.0018	TRUE	NA
MGG_17437	1248	1216	941	1125	1215	1208	1033	1047	1125.72	1212	1040	0.859	-0.22	0.017496	0.0325824	0	0.0039	0.0032	0.0032	TRUE	NA
MGG_17429	809	790	1064	1375	787	785	1168	1280	1005.04	786	1224	1.558	0.64	2.55926e-10	1.01516e-09	0.0014	0.0043	0.0039	0.0039	TRUE	NA
MGG_17426	447	461	903	1199	435	458	991	1116	750.11	446	1054	2.362	1.24	3.33765e-25	2.30012e-24	0.0035	0.0056	0.0053	0.0053	TRUE	NA
MGG_17425	30	30	64	74	29	30	70	69	49.54	30	70	2.358	1.238	0.00391424	0.00820505	0	0.0778	0.0645	0.0645	TRUE	NA
MGG_17422	0	0	6	7	0	0	7	7	3.28	0	7	36.218	5.179	0.01482	0.0280241	0	1.1702	1.0927	1.0927	TRUE	NA
MGG_17399	2716	2578	3349	3680	2643	2561	3676	3426	3076.6	2602	3551	1.364	0.448	3.50523e-12	1.54395e-11	0.0012	0.0017	0.0017	0.0017	TRUE	NA
MGG_17398	211	150	53	65	205	149	58	61	118.27	177	60	0.335	-1.578	1.27014e-07	4.25833e-07	0.0241	0.0329	0.0315	0.0315	TRUE	NA
MGG_17390	67	82	12	39	65	81	13	36	49.04	73	24	0.341	-1.55	0.0016585	0.00366429	0.1863	0.0786	0.0898	0.0898	TRUE	NA
MGG_17389	178	131	217	239	173	130	238	223	191.02	152	230	1.517	0.601	0.00858289	0.0170378	0.014	0.0206	0.0197	0.0197	TRUE	NA
MGG_17385	579	678	748	967	563	674	821	900	739.59	618	860	1.393	0.478	0.000122968	0.000311779	0.0084	0.0057	0.0061	0.0061	TRUE	NA
MGG_17381	30	29	49	72	29	29	54	67	44.71	29	60	2.086	1.061	0.0190996	0.0352773	0	0.0862	0.0731	0.0731	TRUE	NA
MGG_17376	7	15	111	142	7	15	122	132	68.94	11	127	11.732	3.552	1.35749e-14	6.67389e-14	0	0.0561	0.0529	0.0529	TRUE	NA
MGG_17372	3102	3158	1912	2409	3019	3138	2098	2243	2624.45	3078	2170	0.706	-0.503	1.22774e-13	5.78374e-13	0.001	0.002	0.0018	0.0018	TRUE	NA
MGG_17371	2844	2857	2881	3445	2768	2838	3162	3208	2993.93	2803	3185	1.136	0.184	0.00272988	0.00585232	0	0.0018	0.0015	0.0015	TRUE	NA
MGG_17365	1338	1322	3279	3901	1302	1313	3599	3632	2461.6	1308	3616	2.765	1.467	1.29231e-103	2.44036e-102	0	0.0021	0.0017	0.0017	TRUE	NA
MGG_17356	159	125	208	235	155	124	228	219	181.5	140	224	1.602	0.68	0.00300134	0.00640197	0.004	0.0216	0.0194	0.0194	TRUE	NA
MGG_17353	69	72	917	1050	67	72	1006	978	530.68	70	992	14.307	3.839	1.48361e-109	3.00173e-108	0	0.0077	0.0067	0.0067	TRUE	NA
MGG_17348	45	63	239	254	44	63	262	236	151.3	54	249	4.689	2.229	2.94791e-16	1.5412e-15	0.0096	0.0258	0.0244	0.0244	TRUE	NA
MGG_17345	1231	1013	802	820	1198	1006	880	763	962.03	1102	822	0.745	-0.425	0.000266287	0.0006511	0.0116	0.0045	0.0055	0.0055	TRUE	NA
MGG_17344	1992	1731	1524	1548	1939	1720	1673	1441	1693.08	1830	1557	0.85	-0.234	0.0118201	0.0228481	0.0079	0.0028	0.0036	0.0036	TRUE	NA
MGG_17341	1704	1656	1784	2230	1658	1645	1958	2076	1834.46	1652	2017	1.222	0.289	0.000156488	0.000392713	0	0.0026	0.0023	0.0023	TRUE	NA
MGG_17336	7	18	113	185	7	18	124	172	80.24	12	148	12.048	3.591	1.08336e-15	5.55613e-15	0.1343	0.0482	0.053	0.053	TRUE	NA
MGG_17322	0	0	12	15	0	0	13	14	6.78	0	14	75.036	6.23	0.000543602	0.00128233	0	0.5653	0.5216	0.5216	TRUE	NA
MGG_17319	77	81	103	158	75	80	113	147	103.89	78	130	1.677	0.746	0.0135291	0.0257817	0	0.0374	0.0337	0.0337	TRUE	NA
MGG_17318	1127	1120	380	437	1097	1113	417	407	758.37	1105	412	0.373	-1.424	1.80241e-35	1.56044e-34	0	0.0055	0.0046	0.0046	TRUE	NA
MGG_17317	408	370	275	294	397	368	302	274	335.06	382	288	0.752	-0.411	0.0138483	0.0263262	0	0.0119	0.0104	0.0104	TRUE	NA
MGG_17280	258	262	320	360	251	260	351	335	299.44	256	343	1.342	0.424	0.0146255	0.0276753	0	0.0133	0.0111	0.0111	TRUE	NA
MGG_17278	3163	3079	2221	2579	3078	3059	2438	2401	2744.03	3068	2420	0.788	-0.343	5.97549e-08	2.05323e-07	0	0.0019	0.0016	0.0016	TRUE	NA
MGG_17276	1075	1146	366	533	1046	1139	402	496	770.68	1092	449	0.412	-1.279	2.97886e-24	2.00003e-23	0.0097	0.0055	0.006	0.006	TRUE	NA
MGG_17270	26	21	84	63	25	21	92	59	49.25	23	76	3.257	1.704	0.000220202	0.000542743	0.0507	0.0783	0.0741	0.0741	TRUE	NA
MGG_17264	565	543	406	459	550	539	446	427	490.57	544	436	0.801	-0.32	0.0192324	0.0354809	0	0.0083	0.0069	0.0069	TRUE	NA
MGG_17260	61	53	97	122	59	53	106	114	83.02	56	110	1.965	0.974	0.00321196	0.00680916	0	0.0466	0.0392	0.0392	TRUE	NA
MGG_17259	39	48	78	105	38	48	86	98	67.25	43	92	2.144	1.1	0.00314699	0.00668812	0	0.0575	0.0497	0.0497	TRUE	NA
MGG_17258	171	160	238	308	166	159	261	287	218.34	162	274	1.685	0.753	0.000239658	0.000588334	0	0.018	0.0153	0.0153	TRUE	NA
MGG_17253	85	138	276	417	83	137	303	388	227.75	110	346	3.15	1.655	1.49569e-11	6.35623e-11	0.0645	0.0173	0.023	0.023	TRUE	NA
MGG_17252	102	74	136	181	99	74	149	169	122.64	86	159	1.84	0.88	0.00184302	0.00403965	0.0135	0.0317	0.0295	0.0295	TRUE	NA
MGG_17247	1541	1452	1050	1303	1500	1443	1152	1213	1326.97	1472	1182	0.804	-0.314	0.000340267	0.000823784	0	0.0034	0.0029	0.0029	TRUE	NA
MGG_17245	51	46	79	109	50	46	87	101	70.88	48	94	1.976	0.983	0.00621587	0.0126505	0	0.0546	0.0463	0.0463	TRUE	NA
MGG_17241	322	361	548	620	313	359	601	577	462.68	336	589	1.754	0.81	2.66031e-08	9.35341e-08	0.0017	0.0088	0.0079	0.0079	TRUE	NA
MGG_17232	0	0	2	10	0	0	2	9	2.88	0	6	31.991	5	0.026432	0.0473248	1.639	1.3325	1.3497	1.3497	TRUE	NA
MGG_17216	53	68	281	351	52	68	308	327	188.59	60	318	5.337	2.416	5.03151e-23	3.26767e-22	0	0.0208	0.0189	0.0189	TRUE	NA
MGG_17215	3510	3375	14473	16465	3416	3353	15884	15330	9495.82	3384	15607	4.611	2.205	0	0	0.0004	0.0009	0.0008	0.0008	TRUE	NA
MGG_17190	487	532	538	719	474	529	590	669	565.6	502	630	1.258	0.331	0.0141549	0.0268537	0.0052	0.0073	0.007	0.007	TRUE	NA
MGG_17186	10858	11711	5882	7455	10567	11635	6456	6941	8899.72	11101	6698	0.604	-0.728	2.52861e-40	2.34539e-39	0.0034	0.0009	0.0013	0.0013	TRUE	NA
MGG_17180	315	329	208	241	307	327	228	224	271.52	317	226	0.715	-0.485	0.00791362	0.0158086	0	0.0146	0.0122	0.0122	TRUE	NA
MGG_17177	82	61	33	37	80	61	36	34	52.77	70	35	0.503	-0.992	0.0182273	0.0338301	0	0.0731	0.0635	0.0635	TRUE	NA
MGG_17175	266	274	166	208	259	272	182	194	226.74	266	188	0.708	-0.498	0.0125978	0.0242242	0	0.0174	0.0146	0.0146	TRUE	NA
MGG_17174	10	3	0	0	10	3	0	0	3.18	6	0	0.029	-5.096	0.0191533	0.0353469	0.9806	1.206	1.1966	1.1966	TRUE	NA
MGG_17157	45	32	80	147	44	32	88	137	75.06	38	112	2.978	1.575	3.95532e-05	0.000106158	0.0619	0.0515	0.053	0.053	TRUE	NA
MGG_17155	31	24	95	116	30	24	104	108	66.57	27	106	3.929	1.974	3.83732e-07	1.24313e-06	0	0.0581	0.0497	0.0497	TRUE	NA
MGG_17154	1596	1484	1783	1987	1553	1474	1957	1850	1708.63	1514	1904	1.257	0.33	3.57211e-05	9.62953e-05	0.0009	0.0027	0.0025	0.0025	TRUE	NA
MGG_17153	406604	396654	471070	550617	395713	394084	517001	512661	454865	394898	514831	1.304	0.383	5.35763e-40	4.94038e-39	0	0.0005	0.0004	0.0004	TRUE	NA
MGG_17135	666	658	718	925	648	654	788	861	737.79	651	824	1.268	0.342	0.00292282	0.00624534	0	0.0057	0.005	0.005	TRUE	NA
MGG_17134	189	219	104	135	184	218	114	126	160.34	201	120	0.598	-0.742	0.00220724	0.00479233	0	0.0244	0.0215	0.0215	TRUE	NA
MGG_17132	65	33	126	146	63	33	138	136	92.57	48	137	2.852	1.512	1.643e-05	4.59149e-05	0.0726	0.0419	0.0452	0.0452	TRUE	NA
MGG_17123	555	551	260	305	540	547	285	284	414.22	544	284	0.523	-0.934	4.33506e-10	1.69101e-09	0	0.0097	0.0081	0.0081	TRUE	NA
MGG_17122	986	983	568	643	960	977	623	599	789.57	968	611	0.631	-0.665	1.52325e-09	5.78062e-09	0	0.0053	0.0045	0.0045	TRUE	NA
MGG_17119	204	240	87	105	199	238	95	98	157.56	218	96	0.442	-1.176	1.99867e-06	6.07574e-06	0	0.0248	0.0219	0.0219	TRUE	NA
MGG_17113	170	167	209	253	165	166	229	236	199.08	166	232	1.403	0.489	0.0207401	0.0380464	0	0.0197	0.0163	0.0163	TRUE	NA
MGG_17108	24	35	110	108	23	35	121	101	69.85	29	111	3.805	1.928	6.75394e-07	2.13846e-06	0.0142	0.0553	0.0508	0.0508	TRUE	NA
MGG_17103	173757	163981	331104	384674	169103	162919	363388	358157	263391	166011	360772	2.173	1.12	2.12189e-268	1.08021e-266	0.0004	0.0005	0.0005	0.0005	TRUE	NA
MGG_17097	181	180	263	264	176	179	289	246	222.36	178	268	1.504	0.588	0.00419144	0.00875125	0	0.0177	0.0156	0.0156	TRUE	NA
MGG_17092	11	11	75	62	11	11	82	58	40.42	11	70	6.46	2.692	5.3184e-07	1.70001e-06	0	0.0953	0.0857	0.0857	TRUE	NA
MGG_17084	78	97	1329	1567	76	96	1459	1459	772.46	86	1459	16.949	4.083	3.54215e-159	1.04907e-157	0	0.0055	0.005	0.005	TRUE	NA
MGG_17078	658	632	814	854	640	628	893	795	739.19	634	844	1.33	0.412	0.000436299	0.00103987	0.0024	0.0057	0.0052	0.0052	TRUE	NA
MGG_17077	13	10	36	46	13	10	40	43	26.23	12	42	3.646	1.866	0.00223567	0.00484739	0	0.1466	0.1232	0.1232	TRUE	NA
MGG_17075	2	2	12	18	2	2	13	17	8.47	2	15	7.621	2.93	0.012616	0.024255	0	0.4531	0.3791	0.3791	TRUE	NA
MGG_17073	1088	1015	1555	1760	1059	1008	1707	1639	1353.14	1034	1673	1.618	0.694	1.88552e-15	9.59877e-15	0	0.0033	0.0029	0.0029	TRUE	NA
MGG_17072	4958	5141	3689	4376	4825	5108	4049	4074	4513.98	4966	4062	0.818	-0.29	1.35956e-07	4.54986e-07	0.0006	0.0013	0.0012	0.0012	TRUE	NA
MGG_17066	3	1	13	13	3	1	14	12	7.57	2	13	6.714	2.747	0.0252363	0.0454789	0	0.5066	0.435	0.435	TRUE	NA
MGG_17062	6889	6632	5181	6234	6704	6589	5686	5804	6195.98	6646	5745	0.864	-0.21	1.0808e-05	3.06772e-05	0	0.0011	0.0009	0.0009	TRUE	NA
MGG_17060	1451	1363	1534	1819	1412	1354	1684	1694	1535.87	1383	1689	1.221	0.288	0.000398948	0.000954762	0	0.003	0.0025	0.0025	TRUE	NA
MGG_17054	792	680	840	927	771	676	922	863	807.85	724	892	1.233	0.303	0.00834144	0.0165942	0.004	0.0052	0.0051	0.0051	TRUE	NA
MGG_17052	417	414	272	318	406	411	299	296	352.94	408	298	0.728	-0.459	0.00411953	0.00860598	0	0.0114	0.0094	0.0094	TRUE	NA
MGG_17042	668	659	410	442	650	655	450	412	541.59	652	431	0.66	-0.6	5.87121e-06	1.70592e-05	0	0.0076	0.0065	0.0065	TRUE	NA
MGG_17041	7174	6947	3072	3671	6982	6902	3372	3418	5168.33	6942	3395	0.489	-1.032	1.07265e-91	1.86022e-90	0	0.0012	0.001	0.001	TRUE	NA
MGG_17038	255	229	780	900	248	228	856	838	542.42	238	847	3.56	1.832	3.55566e-40	3.28697e-39	0	0.0076	0.0065	0.0065	TRUE	NA
MGG_17024	0	3	79	135	0	3	87	126	53.84	2	106	72.057	6.171	2.34163e-11	9.85445e-11	0.0774	0.0717	0.0719	0.0719	TRUE	NA
MGG_17023	4	1	86	95	4	1	94	88	46.93	2	91	37.212	5.218	8.30537e-12	3.58256e-11	0	0.0821	0.0744	0.0744	TRUE	NA
MGG_17000	1743	1722	912	1064	1696	1711	1001	991	1349.68	1704	996	0.584	-0.775	1.96827e-19	1.15657e-18	0	0.0033	0.0028	0.0028	TRUE	NA
MGG_16982	295	274	408	509	287	272	448	474	370.25	280	461	1.648	0.721	5.18266e-06	1.51342e-05	0	0.0108	0.0092	0.0092	TRUE	NA
MGG_16981	546	576	679	895	531	572	745	833	670.54	552	789	1.432	0.518	2.69723e-05	7.37714e-05	0.0032	0.0062	0.0058	0.0058	TRUE	NA
MGG_16977	417	368	572	776	406	366	628	723	530.43	386	676	1.752	0.809	8.75849e-09	3.16814e-08	0.006	0.0077	0.0075	0.0075	TRUE	NA
MGG_16972	85	76	22	35	83	76	24	33	53.74	80	28	0.36	-1.473	0.000498542	0.00118007	0	0.0718	0.0621	0.0621	TRUE	NA
MGG_16971	33	25	10	3	32	25	11	3	17.68	28	7	0.237	-2.078	0.00936418	0.018433	0.1891	0.2172	0.215	0.215	TRUE	NA
MGG_16970	329	256	190	220	320	254	209	205	246.97	287	207	0.719	-0.476	0.0178336	0.0331608	0.0105	0.016	0.0152	0.0152	TRUE	NA
MGG_16969	1171	1154	381	477	1140	1147	418	444	787.11	1144	431	0.377	-1.405	1.93156e-35	1.66963e-34	0	0.0054	0.0045	0.0045	TRUE	NA
MGG_16966	495	422	176	243	482	419	193	226	330.1	450	210	0.466	-1.101	4.62131e-10	1.79823e-09	0.0075	0.0121	0.0115	0.0115	TRUE	NA
MGG_16965	102	81	591	706	99	80	649	657	371.42	90	653	7.262	2.86	2.03888e-55	2.42188e-54	0	0.0108	0.0097	0.0097	TRUE	NA
MGG_16964	1	1	10	11	1	1	11	10	5.8	1	10	10.784	3.431	0.0232024	0.042199	0	0.6616	0.5496	0.5496	TRUE	NA
MGG_16962	4	10	0	0	4	10	0	0	3.46	7	0	0.027	-5.216	0.01369	0.0260478	0.5179	1.1088	1.0795	1.0795	TRUE	NA
MGG_16961	227	181	1743	2153	221	180	1913	2005	1079.57	200	1959	9.772	3.289	4.88811e-170	1.56519e-168	0.0035	0.004	0.004	0.004	TRUE	NA
MGG_16951	39	59	4	12	38	59	4	11	28.03	48	8	0.164	-2.608	7.65221e-05	0.000199514	0.1132	0.1372	0.1349	0.1349	TRUE	NA
MGG_16927	1225	1206	659	702	1192	1198	723	654	941.81	1195	688	0.575	-0.797	2.14958e-14	1.04794e-13	0.0006	0.0046	0.0041	0.0041	TRUE	NA
MGG_16926	725	660	253	310	706	656	278	289	481.9	681	284	0.416	-1.265	7.59952e-19	4.37477e-18	0	0.0084	0.0073	0.0073	TRUE	NA
MGG_16925	198	275	129	155	193	273	142	144	187.95	233	143	0.614	-0.704	0.00324009	0.00686221	0.0272	0.0209	0.0218	0.0218	TRUE	NA
MGG_16924	392	362	225	249	381	360	247	232	304.98	370	240	0.645	-0.632	0.00027636	0.000674238	0	0.0131	0.011	0.011	TRUE	NA
MGG_16921	647	603	309	320	630	599	339	298	466.46	614	318	0.518	-0.95	6.82772e-11	2.80498e-10	0	0.0087	0.0078	0.0078	TRUE	NA
MGG_16920	2343	2260	1352	1504	2280	2245	1484	1400	1852.44	2262	1442	0.637	-0.651	1.4746e-17	8.0843e-17	0	0.0026	0.0022	0.0022	TRUE	NA
MGG_16917	75	52	101	110	73	52	111	102	84.48	62	106	1.709	0.773	0.0214809	0.0393206	0.0118	0.0458	0.0417	0.0417	TRUE	NA
MGG_16904	1563	1776	1774	2507	1521	1764	1947	2334	1891.7	1642	2140	1.304	0.383	7.59912e-05	0.000198176	0.0126	0.0025	0.004	0.004	TRUE	NA
MGG_16901	3988	4063	2308	2778	3881	4037	2533	2587	3259.35	3959	2560	0.647	-0.629	3.68949e-25	2.54101e-24	0	0.0017	0.0014	0.0014	TRUE	NA
MGG_16900	308	289	185	236	300	287	203	220	252.41	294	212	0.721	-0.472	0.0128261	0.0246031	0	0.0157	0.0132	0.0132	TRUE	NA
MGG_16895	5937	5854	3375	3760	5778	5816	3704	3501	4699.73	5797	3602	0.621	-0.687	9.16573e-37	8.12631e-36	0.0004	0.0013	0.0012	0.0012	TRUE	NA
MGG_16887	2810	2845	2970	3630	2735	2827	3260	3380	3050.16	2781	3320	1.194	0.256	3.78496e-05	0.000101882	0	0.0018	0.0015	0.0015	TRUE	NA
MGG_16886	614	536	1026	1155	598	533	1126	1075	832.88	566	1100	1.947	0.961	9.0878e-18	5.02719e-17	0.0019	0.0051	0.0047	0.0047	TRUE	NA
MGG_16880	1277	1312	2829	3407	1243	1304	3105	3172	2205.82	1274	3138	2.466	1.302	1.49675e-73	2.18134e-72	0	0.0022	0.0019	0.0019	TRUE	NA
MGG_16871	31	42	133	180	30	42	146	168	96.36	36	157	4.368	2.127	1.79586e-10	7.18539e-10	0	0.0403	0.0365	0.0365	TRUE	NA
MGG_16869	6172	6146	7031	8211	6007	6106	7717	7645	6868.6	6056	7681	1.268	0.343	8.76256e-14	4.15986e-13	0	0.0011	0.0009	0.0009	TRUE	NA
MGG_16868	287	195	1116	1272	279	194	1225	1184	720.54	236	1204	5.089	2.347	5.58643e-59	6.9263e-58	0.028	0.0058	0.0076	0.0076	TRUE	NA
MGG_16866	9479	9304	6559	7783	9225	9244	7199	7246	8228.46	9234	7222	0.782	-0.354	2.71571e-16	1.42048e-15	0	0.001	0.0008	0.0008	TRUE	NA
MGG_16862	2995	2924	2121	2489	2915	2905	2328	2317	2616.26	2910	2322	0.798	-0.325	4.35626e-07	1.40466e-06	0	0.002	0.0016	0.0016	TRUE	NA
MGG_16861	617	559	371	510	600	555	407	475	509.47	578	441	0.764	-0.388	0.00608441	0.0124049	0.0051	0.008	0.0076	0.0076	TRUE	NA
MGG_16860	77	93	218	222	75	92	239	207	153.32	84	223	2.663	1.413	3.07765e-08	1.07625e-07	0	0.0255	0.0231	0.0231	TRUE	NA
MGG_16856	1201	1230	898	1018	1169	1222	986	948	1081.06	1196	967	0.808	-0.307	0.0013222	0.00296394	0	0.004	0.0035	0.0035	TRUE	NA
MGG_16854	3731	3617	2651	3390	3631	3594	2909	3156	3322.61	3612	3032	0.84	-0.251	6.49784e-05	0.000170787	0.0011	0.0016	0.0016	0.0016	TRUE	NA
MGG_16853	835	844	3011	3406	813	839	3305	3171	2031.74	826	3238	3.921	1.971	1.42237e-145	3.7681e-144	0	0.0024	0.0021	0.0021	TRUE	NA
MGG_16852	1325	1280	797	1066	1290	1272	875	993	1107.11	1281	934	0.73	-0.454	4.63375e-06	1.35852e-05	0.0028	0.004	0.0038	0.0038	TRUE	NA
MGG_16849	52	59	86	102	51	59	94	95	74.64	55	94	1.734	0.794	0.0220492	0.0402675	0	0.0518	0.0435	0.0435	TRUE	NA
MGG_16847	106	79	21	28	103	78	23	26	57.69	90	24	0.271	-1.884	7.69836e-06	2.2118e-05	0	0.0669	0.0593	0.0593	TRUE	NA
MGG_16841	716	624	426	457	697	620	468	425	552.45	658	446	0.677	-0.562	3.3801e-05	9.143e-05	0.0039	0.0074	0.0069	0.0069	TRUE	NA
MGG_16836	15617	14707	3088	3806	15199	14612	3389	3544	9185.78	14906	3466	0.233	-2.104	0	0	0.0005	0.0009	0.0009	0.0009	TRUE	NA
MGG_16831	8	9	27	39	8	9	30	36	20.67	8	33	3.949	1.981	0.0042326	0.0088305	0	0.1859	0.1564	0.1564	TRUE	NA
MGG_16828	42	58	86	149	41	58	94	139	82.9	50	116	2.374	1.247	0.000511728	0.00120938	0.0529	0.0467	0.0476	0.0476	TRUE	NA
MGG_16825	267	312	525	586	260	310	576	546	422.91	285	561	1.968	0.977	3.02387e-10	1.19473e-09	0.0044	0.0096	0.0089	0.0089	TRUE	NA
MGG_16815	811	824	1247	1437	789	819	1369	1338	1078.62	804	1354	1.683	0.751	3.79594e-15	1.90262e-14	0	0.004	0.0034	0.0034	TRUE	NA
MGG_16813	1	7	166	164	1	7	182	153	85.7	4	168	42.485	5.409	1.64195e-19	9.67908e-19	0.0142	0.0452	0.0443	0.0443	TRUE	NA
MGG_16812	11	16	3682	4069	11	16	4041	3789	1964.03	14	3915	294.823	8.204	8.41417e-180	2.79133e-178	0	0.0024	0.0024	0.0024	TRUE	NA
MGG_16804	5	1	12	23	5	1	13	21	10.11	3	17	5.899	2.56	0.0170139	0.0318078	0.1255	0.3794	0.3566	0.3566	TRUE	NA
MGG_16793	1029	1040	2052	2294	1001	1033	2252	2136	1605.66	1017	2194	2.156	1.108	1.49715e-41	1.4221e-40	0	0.0029	0.0025	0.0025	TRUE	NA
MGG_16792	126680	124826	122272	142984	123287	124017	134194	133127	128656	123652	133660	1.081	0.112	0.00016097	0.00040332	0	0.0005	0.0004	0.0004	TRUE	NA
MGG_16756	1163	1169	1279	1519	1132	1161	1404	1414	1277.82	1146	1409	1.229	0.297	0.000685688	0.00159335	0	0.0035	0.0029	0.0029	TRUE	NA
MGG_16755	355	333	225	269	345	331	247	250	293.43	338	248	0.736	-0.443	0.0114471	0.0221696	0	0.0136	0.0113	0.0113	TRUE	NA
MGG_16750	455	395	226	315	443	392	248	293	344.14	418	270	0.649	-0.623	0.000271144	0.000662683	0.0072	0.0116	0.011	0.011	TRUE	NA
MGG_16744	671	696	339	333	653	691	372	310	506.65	672	341	0.506	-0.982	9.59877e-12	4.12117e-11	0.0056	0.0081	0.0078	0.0078	TRUE	NA
MGG_16743	502	538	1239	1538	489	535	1360	1432	953.71	512	1396	2.73	1.449	1.35908e-42	1.30782e-41	0.0009	0.0045	0.0041	0.0041	TRUE	NA
MGG_16739	22398	22999	12445	15085	21798	22850	13658	14045	18087.9	22324	13852	0.621	-0.688	1.48208e-66	2.01633e-65	0.0006	0.0007	0.0007	0.0007	TRUE	NA
MGG_16738	282	260	147	188	274	258	161	175	217.28	266	168	0.632	-0.662	0.00123543	0.00278357	0	0.0181	0.0153	0.0153	TRUE	NA
MGG_16734	5208	5068	3294	4112	5068	5035	3615	3829	4386.85	5052	3722	0.737	-0.44	1.98322e-15	1.00683e-14	0.0005	0.0014	0.0012	0.0012	TRUE	NA
MGG_16733	60	45	140	162	58	45	154	151	101.9	52	152	2.951	1.561	4.86176e-07	1.55901e-06	0	0.0381	0.0334	0.0334	TRUE	NA
MGG_16729	284	424	756	888	276	421	830	827	588.54	348	828	2.375	1.248	1.97278e-05	5.46336e-05	0.039	0.007	0.0107	0.039	TRUE	NA
MGG_16728	3373	2929	1938	2127	3283	2910	2127	1980	2575	3096	2054	0.663	-0.593	5.77618e-15	2.88731e-14	0.0041	0.002	0.0024	0.0024	TRUE	NA
MGG_16727	10	6	60	83	10	6	66	77	39.71	8	72	9.115	3.188	2.11665e-08	7.47288e-08	0	0.097	0.086	0.086	TRUE	NA
MGG_16722	0	0	4	14	0	0	4	13	4.36	0	8	48.398	5.597	0.00528038	0.0108647	0.7848	0.88	0.8764	0.8764	TRUE	NA
MGG_16721	75	52	5950	6926	73	52	6530	6449	3275.84	62	6490	103.945	6.7	0	0	0	0.0017	0.0015	0.0015	TRUE	NA
MGG_16720	14	18	657	625	14	18	721	582	333.62	16	652	41.362	5.37	2.28127e-69	3.19003e-68	0	0.012	0.0127	0.0127	TRUE	NA
MGG_16718	28	37	136	148	27	37	149	138	87.77	32	144	4.485	2.165	4.35551e-10	1.69779e-09	0	0.0442	0.0389	0.0389	TRUE	NA
MGG_16714	852	780	380	515	829	775	417	479	625.17	802	448	0.56	-0.837	8.27939e-11	3.38374e-10	0.0036	0.0066	0.0062	0.0062	TRUE	NA
MGG_16711	4874	4798	1677	1924	4743	4767	1841	1791	3285.56	4755	1816	0.382	-1.389	6.63332e-116	1.44249e-114	0	0.0017	0.0014	0.0014	TRUE	NA
MGG_16710	70	54	21	28	68	54	23	26	42.72	61	24	0.404	-1.308	0.00536849	0.0110275	0	0.0902	0.0774	0.0774	TRUE	NA
MGG_16706	4504	4407	3537	4144	4383	4378	3882	3858	4125.5	4380	3870	0.883	-0.179	0.000932629	0.00213617	0	0.0014	0.0012	0.0012	TRUE	NA
MGG_16704	692	606	1092	1304	673	602	1198	1214	922.03	638	1206	1.891	0.919	4.94055e-18	2.76346e-17	0.0012	0.0047	0.0042	0.0042	TRUE	NA
MGG_16696	1	1	488	517	1	1	536	481	254.73	1	508	516.847	9.014	3.24661e-18	1.8308e-17	0	0.0155	0.0144	0.0144	TRUE	NA
MGG_16690	11	8	39	61	11	8	43	57	29.56	10	50	5.345	2.418	6.68684e-05	0.00017542	0	0.1301	0.1139	0.1139	TRUE	NA
MGG_16681	638	677	481	528	621	673	528	492	578.26	647	510	0.788	-0.344	0.00776089	0.015526	0	0.0071	0.0063	0.0063	TRUE	NA
MGG_16679	0	0	4	11	0	0	4	10	3.66	0	7	40.606	5.344	0.01029	0.02008	0.3393	1.0479	1.0147	1.0147	TRUE	NA
MGG_16669	1778	1770	1222	1571	1730	1759	1341	1463	1573.19	1744	1402	0.804	-0.314	0.000158447	0.000397268	0.0011	0.0029	0.0027	0.0027	TRUE	NA
MGG_16668	11364	11628	3461	4212	11060	11553	3798	3922	7583.09	11306	3860	0.342	-1.55	2.21908e-227	9.18134e-226	0.0006	0.001	0.0009	0.0009	TRUE	NA
MGG_16633	7	5	21	26	7	5	23	24	14.76	6	24	4.01	2.004	0.0143937	0.027274	0	0.2601	0.2172	0.2172	TRUE	NA
MGG_16630	4580	4489	1909	2167	4457	4460	2095	2018	3257.5	4458	2056	0.461	-1.117	1.62831e-75	2.41773e-74	0	0.0017	0.0014	0.0014	TRUE	NA
MGG_16609	0	0	71	113	0	0	78	105	45.78	0	92	506.995	8.986	2.26453e-09	8.48873e-09	0.0351	0.0842	0.0802	0.0802	TRUE	NA
MGG_16596	2137	2069	1152	1379	2080	2056	1264	1284	1670.9	2068	1274	0.616	-0.698	4.44759e-19	2.58184e-18	0	0.0028	0.0023	0.0023	TRUE	NA
MGG_16595	1339	1295	942	1149	1303	1287	1034	1070	1173.35	1295	1052	0.813	-0.299	0.00103254	0.0023504	0	0.0038	0.0031	0.0031	TRUE	NA
MGG_16549	263	299	162	240	256	297	178	223	238.57	276	200	0.727	-0.459	0.0259854	0.0466063	0.0136	0.0166	0.0162	0.0162	TRUE	NA
MGG_16531	479	425	630	788	466	422	691	734	578.38	444	712	1.605	0.682	1.60198e-07	5.34817e-07	0	0.0071	0.0063	0.0063	TRUE	NA
MGG_16528	77	84	152	183	75	83	167	170	123.9	79	168	2.13	1.091	6.13993e-05	0.000161726	0	0.0314	0.0264	0.0264	TRUE	NA
MGG_16522	1	1	47	55	1	1	52	51	26.19	1	52	52.268	5.708	7.4239e-07	2.34186e-06	0	0.1468	0.129	0.129	TRUE	NA
MGG_16520	202	251	314	312	197	249	345	290	270.27	223	318	1.423	0.509	0.0101366	0.0198275	0.0171	0.0147	0.015	0.015	TRUE	NA
MGG_16519	0	0	18	23	0	0	20	21	10.29	0	20	113.855	6.831	5.10589e-05	0.000135393	0	0.3728	0.3418	0.3418	TRUE	NA
MGG_16513	8	1	17	32	8	1	19	30	14.31	4	24	5.513	2.463	0.00795758	0.0158821	0.4448	0.2683	0.2813	0.2813	TRUE	NA
MGG_16507	38	52	252	268	37	52	277	250	153.69	44	264	5.936	2.57	1.32999e-20	8.07277e-20	0.0037	0.0254	0.0236	0.0236	TRUE	NA
MGG_16506	5	5	53	79	5	5	58	74	35.39	5	66	13.414	3.746	8.63401e-09	3.12516e-08	0	0.1088	0.0958	0.0958	TRUE	NA
MGG_16493	298	312	166	160	290	310	182	149	232.79	300	166	0.551	-0.861	2.5635e-05	7.02529e-05	0.004	0.017	0.0154	0.0154	TRUE	NA
MGG_16483	8	12	0	1	8	12	0	1	5.16	10	0	0.051	-4.299	0.0211597	0.0387583	0	0.7431	0.6569	0.6569	TRUE	NA
MGG_16472	30626	29906	32197	37739	29806	29712	35336	35137	32497.9	29759	35236	1.184	0.244	1.19661e-13	5.63947e-13	0	0.0006	0.0005	0.0005	TRUE	NA
MGG_16471	6	3	29	51	6	3	32	47	22.03	4	40	8.995	3.169	3.6601e-05	9.85934e-05	0	0.1744	0.1592	0.1592	TRUE	NA
MGG_16466	4	6	23	42	4	6	25	39	18.55	5	32	6.554	2.712	0.000597376	0.00139843	0	0.207	0.1844	0.1844	TRUE	NA
MGG_16465	41	37	85	104	40	37	93	97	66.7	38	95	2.48	1.311	0.000424453	0.00101382	0	0.0579	0.0483	0.0483	TRUE	NA
MGG_16462	12525	11846	8001	9322	12189	11769	8781	8679	10354.8	11979	8730	0.729	-0.457	3.67176e-27	2.66855e-26	0.0003	0.0009	0.0008	0.0008	TRUE	NA
MGG_16460	111	97	234	313	108	96	257	291	188.16	102	274	2.684	1.424	4.16652e-10	1.62756e-09	0	0.0209	0.0183	0.0183	TRUE	NA
MGG_16459	7874	7385	6077	7405	7663	7337	6670	6895	7141.08	7500	6782	0.904	-0.145	0.00248847	0.0053608	0.0005	0.001	0.001	0.001	TRUE	NA
MGG_16457	976	935	668	713	950	929	733	664	818.95	940	698	0.743	-0.429	0.000102757	0.000263501	0.0009	0.0052	0.0046	0.0046	TRUE	NA
MGG_16456	51	52	126	143	50	52	138	133	93.18	51	136	2.679	1.422	7.03594e-06	2.02887e-05	0	0.0416	0.0347	0.0347	TRUE	NA
MGG_16445	13082	13336	16184	19393	12732	13250	17762	18056	15449.8	12991	17909	1.379	0.463	7.36307e-32	5.92856e-31	0.0003	0.0007	0.0007	0.0007	TRUE	NA
MGG_16444	1202	1145	1750	1953	1170	1138	1921	1818	1511.6	1154	1870	1.62	0.696	6.80719e-17	3.6416e-16	0	0.003	0.0026	0.0026	TRUE	NA
MGG_16443	875	899	619	719	852	893	679	669	773.38	872	674	0.773	-0.371	0.000800858	0.0018466	0	0.0055	0.0046	0.0046	TRUE	NA
MGG_16442	589	565	330	365	573	561	362	340	459.14	567	351	0.618	-0.694	1.1285e-06	3.50775e-06	0	0.0088	0.0074	0.0074	TRUE	NA
MGG_16441	1592	1551	2120	2577	1549	1541	2327	2399	1954.09	1545	2363	1.53	0.613	6.53639e-17	3.50182e-16	0	0.0025	0.0021	0.0021	TRUE	NA
MGG_16433	8	10	22	36	8	10	24	34	18.85	9	29	3.263	1.706	0.0173809	0.0324062	0	0.2038	0.1742	0.1742	TRUE	NA
MGG_16432	236	203	566	732	230	202	621	682	433.52	216	652	3.021	1.595	9.49934e-25	6.4578e-24	0.0032	0.0093	0.0085	0.0085	TRUE	NA
MGG_16431	3	0	43	65	3	0	47	61	27.66	2	54	36.623	5.195	1.7305e-07	5.75463e-07	0.0142	0.139	0.1314	0.1314	TRUE	NA
MGG_16429	2362	2134	2648	2914	2299	2120	2906	2713	2509.56	2210	2810	1.271	0.346	1.47581e-06	4.54132e-06	0.0024	0.002	0.0021	0.0021	TRUE	NA
MGG_16427	566	629	864	1004	551	625	948	935	764.7	588	942	1.602	0.68	4.30724e-09	1.58978e-08	0.002	0.0055	0.0051	0.0051	TRUE	NA
MGG_16426	148	131	200	221	144	130	220	206	174.86	137	213	1.55	0.632	0.00554271	0.0113558	0	0.0224	0.019	0.019	TRUE	NA
MGG_16425	196	170	311	345	191	169	341	321	255.55	180	331	1.841	0.88	4.38191e-06	1.28776e-05	0	0.0155	0.0134	0.0134	TRUE	NA
MGG_16424	116	85	42	64	113	84	46	60	75.76	98	53	0.537	-0.897	0.0124493	0.0239594	0.0246	0.0511	0.0474	0.0474	TRUE	NA
MGG_16419	1299	1160	1580	1788	1264	1152	1734	1665	1453.87	1208	1700	1.406	0.491	1.62544e-08	5.78674e-08	0.0017	0.0031	0.0029	0.0029	TRUE	NA
MGG_16418	344	335	407	530	335	333	447	493	401.94	334	470	1.409	0.495	0.00118709	0.00268317	0	0.01	0.0087	0.0087	TRUE	NA
MGG_16417	1763	1691	1217	1350	1716	1680	1336	1257	1497.11	1698	1296	0.763	-0.39	2.83274e-06	8.47826e-06	0	0.0031	0.0027	0.0027	TRUE	NA
MGG_16409	525	553	647	719	511	549	710	669	609.97	530	690	1.3	0.379	0.00250968	0.00540122	0	0.0068	0.0059	0.0059	TRUE	NA
MGG_16408	928	906	2350	2851	903	900	2579	2654	1759.22	902	2616	2.903	1.537	1.09911e-84	1.79348e-83	0	0.0027	0.0022	0.0022	TRUE	NA
MGG_16395	4419	4290	10196	12123	4301	4262	11190	11287	7760.07	4282	11238	2.625	1.392	6.49973e-211	2.47595e-209	0	0.001	0.0008	0.0008	TRUE	NA
MGG_16393	609	536	818	897	593	533	898	835	714.53	563	866	1.539	0.622	1.93524e-07	6.40653e-07	0.0025	0.0059	0.0054	0.0054	TRUE	NA
MGG_16392	12051	10921	5500	6304	11728	10850	6036	5869	8621.04	11289	5952	0.527	-0.924	3.97807e-77	6.01173e-76	0.0015	0.0009	0.0011	0.0011	TRUE	NA
MGG_16391	97	89	156	205	94	88	171	191	136.23	91	181	1.982	0.987	0.00014651	0.000368987	0	0.0286	0.0243	0.0243	TRUE	NA
MGG_16390	185	206	382	436	180	205	419	406	302.48	192	412	2.145	1.101	5.98607e-10	2.31703e-09	0	0.0132	0.0114	0.0114	TRUE	NA
MGG_16389	623	588	1086	1310	606	584	1192	1220	900.52	595	1206	2.026	1.019	1.68402e-22	1.07659e-21	0	0.0048	0.004	0.004	TRUE	NA
MGG_16375	24230	22378	35250	40127	23581	22233	38687	37361	30465.5	22907	38024	1.66	0.731	6.41772e-77	9.67211e-76	0.0011	0.0006	0.0007	0.0007	TRUE	NA
MGG_16374	40199	37443	24243	27121	39122	37200	26607	25251	32045.2	38161	25929	0.679	-0.558	2.05693e-44	2.05266e-43	0.0013	0.0006	0.0007	0.0007	TRUE	NA
MGG_16373	131	165	323	401	127	164	354	373	254.82	146	364	2.499	1.322	4.97489e-11	2.05757e-10	0.0075	0.0155	0.0147	0.0147	TRUE	NA
MGG_16372	7	8	21	27	7	8	23	25	15.74	8	24	3.268	1.708	0.0277899	0.0495873	0	0.244	0.2019	0.2019	TRUE	NA
MGG_16364	127	128	152	224	124	127	167	209	156.54	126	188	1.5	0.585	0.0175902	0.0327246	0	0.025	0.0225	0.0225	TRUE	NA
MGG_16355	0	0	8	3	0	0	9	3	2.89	0	6	31.831	4.992	0.0252845	0.0455435	0.9768	1.3247	1.3049	1.3049	TRUE	NA
MGG_16353	3	0	12	13	3	0	13	12	7.05	2	12	8.602	3.105	0.0224086	0.0408427	0	0.5441	0.5133	0.5133	TRUE	NA
MGG_16342	4	1	16	15	4	1	18	14	9.1	2	16	6.423	2.683	0.0170343	0.0318406	0	0.4214	0.3748	0.3748	TRUE	NA
MGG_16341	5870	6193	8309	10620	5713	6153	9119	9888	7718.18	5933	9504	1.602	0.68	6.072e-36	5.30256e-35	0.0027	0.001	0.0013	0.0013	TRUE	NA
MGG_16339	4	3	142	159	4	3	156	148	77.69	4	152	44.147	5.464	3.85352e-18	2.1653e-17	0	0.0498	0.044	0.044	TRUE	NA
MGG_16334	5649	5850	4634	5629	5498	5812	5086	5241	5409.15	5655	5164	0.913	-0.131	0.0128366	0.0246105	0.0008	0.0012	0.0011	0.0011	TRUE	NA
MGG_16333	1887	1708	1456	1602	1836	1697	1598	1492	1655.73	1766	1545	0.874	-0.195	0.0192775	0.0355583	0.0022	0.0028	0.0027	0.0027	TRUE	NA
MGG_16319	202	187	260	281	197	186	285	262	232.34	192	274	1.429	0.515	0.0092555	0.0182647	0	0.017	0.0144	0.0144	TRUE	NA
MGG_16316	369	317	68	96	359	315	75	89	209.52	337	82	0.244	-2.035	2.87022e-19	1.67586e-18	0	0.0188	0.0171	0.0171	TRUE	NA
MGG_16315	597	567	1181	1439	581	563	1296	1340	945.07	572	1318	2.304	1.204	1.13793e-31	9.12908e-31	0	0.0046	0.0038	0.0038	TRUE	NA
MGG_16300	223	219	783	965	217	218	859	898	548.11	218	878	4.046	2.016	3.6477e-48	3.83772e-47	0	0.0075	0.0063	0.0063	TRUE	NA
MGG_16299	3897	3851	7914	9137	3793	3826	8686	8507	6202.86	3810	8596	2.256	1.174	4.8602e-131	1.17485e-129	0	0.0011	0.0009	0.0009	TRUE	NA
MGG_16286	769	725	829	1053	748	720	910	980	839.74	734	945	1.288	0.365	0.000753466	0.0017406	0	0.0051	0.0044	0.0044	TRUE	NA
MGG_16276	653	590	291	334	636	586	319	311	463.01	611	315	0.516	-0.955	3.19387e-11	1.33546e-10	0	0.0088	0.0075	0.0075	TRUE	NA
MGG_16260	533	552	1458	1702	519	548	1600	1585	1063	534	1592	2.985	1.578	5.68713e-57	6.90392e-56	0	0.0041	0.0035	0.0035	TRUE	NA
MGG_16259	17066	16916	23971	28732	16609	16806	26308	26751	21618.7	16708	26530	1.588	0.667	9.55033e-79	1.46939e-77	0.0001	0.0007	0.0006	0.0006	TRUE	NA
MGG_16251	899	949	1319	1570	875	943	1448	1462	1181.79	909	1455	1.601	0.679	2.89248e-13	1.33528e-12	0	0.0037	0.0033	0.0033	TRUE	NA
MGG_16250	151	143	56	61	147	142	61	57	101.82	144	59	0.409	-1.291	1.91332e-05	5.30401e-05	0	0.0381	0.0319	0.0319	TRUE	NA
MGG_16248	21150	19852	11120	13073	20583	19723	12204	12172	16170.7	20153	12188	0.605	-0.726	4.41126e-76	6.62109e-75	0.0003	0.0007	0.0007	0.0007	TRUE	NA
MGG_16247	810	805	492	601	788	800	540	560	671.91	794	550	0.693	-0.53	7.25477e-06	2.08816e-05	0	0.0062	0.0052	0.0052	TRUE	NA
MGG_16236	120	96	64	53	117	95	70	49	82.94	106	60	0.561	-0.833	0.0155055	0.0292203	0.0245	0.0467	0.0438	0.0438	TRUE	NA
MGG_16233	98	65	387	421	95	65	425	392	244.17	80	408	5.099	2.35	6.44031e-26	4.53449e-25	0.0213	0.0162	0.0166	0.0166	TRUE	NA
MGG_16230	7851	7545	4444	5210	7641	7496	4877	4851	6216.24	7568	4864	0.643	-0.638	5.91501e-41	5.56585e-40	0	0.0011	0.0009	0.0009	TRUE	NA
MGG_16221	469	499	299	407	456	496	328	379	414.83	476	354	0.744	-0.427	0.00560056	0.0114637	0.004	0.0097	0.009	0.009	TRUE	NA
MGG_16220	1277	1218	740	806	1243	1210	812	750	1003.87	1226	781	0.636	-0.652	8.111e-11	3.3186e-10	0	0.0043	0.0038	0.0038	TRUE	NA
MGG_16216	0	0	6	6	0	0	7	6	3.04	0	6	33.618	5.071	0.019429	0.0358198	0	1.2596	1.1786	1.1786	TRUE	NA
MGG_16213	3168	3285	1720	2180	3083	3264	1888	2030	2566.07	3174	1959	0.618	-0.695	3.2054e-23	2.09156e-22	0.0017	0.002	0.0019	0.0019	TRUE	NA
MGG_16212	205	195	75	82	200	194	82	76	137.98	197	79	0.403	-1.311	4.70484e-07	1.51e-06	0	0.0283	0.0237	0.0237	TRUE	NA
MGG_16211	430	368	266	259	418	366	292	241	329.29	392	266	0.678	-0.56	0.00154932	0.00344096	0.0101	0.0121	0.0119	0.0119	TRUE	NA
MGG_16204	14589	13811	8350	9430	14198	13722	9164	8780	11466	13960	8972	0.643	-0.638	1.24789e-49	1.35019e-48	0.0006	0.0008	0.0008	0.0008	TRUE	NA
MGG_16202	380	424	617	627	370	421	677	584	513	396	630	1.593	0.671	3.23098e-06	9.61288e-06	0.0078	0.008	0.0079	0.0079	TRUE	NA
MGG_16201	29781	30984	24638	30531	28983	30783	27040	28426	28808.3	29883	27733	0.928	-0.108	0.00891887	0.0176571	0.0015	0.0006	0.0008	0.0008	TRUE	NA
MGG_16198	84	65	109	134	82	65	120	125	97.68	74	122	1.67	0.74	0.0161148	0.0302704	0	0.0397	0.0346	0.0346	TRUE	NA
MGG_16196	1555	1469	1145	1265	1513	1459	1257	1178	1351.82	1486	1218	0.818	-0.289	0.000957369	0.00218966	0	0.0033	0.0029	0.0029	TRUE	NA
MGG_16195	35555	33575	46274	52989	34603	33357	50786	49336	42020.6	33980	50061	1.473	0.559	2.08711e-56	2.50885e-55	0.0005	0.0006	0.0006	0.0006	TRUE	NA
MGG_16194	347	295	2139	2323	338	293	2348	2163	1285.3	316	2256	7.145	2.837	3.11733e-160	9.28224e-159	0.004	0.0035	0.0035	0.0035	TRUE	NA
MGG_16187	254568	235167	201663	226194	247749	233644	221326	210601	228330	240696	215964	0.897	-0.156	3.51343e-05	9.48275e-05	0.0015	0.0005	0.0007	0.0007	TRUE	NA
MGG_16186	1004	900	1016	1205	977	894	1115	1122	1027.07	936	1118	1.195	0.257	0.00949763	0.0186791	0	0.0042	0.0038	0.0038	TRUE	NA
MGG_16183	586	615	676	836	570	611	742	778	675.4	590	760	1.288	0.365	0.00222866	0.00483598	0	0.0062	0.0053	0.0053	TRUE	NA
MGG_16182	38	20	60	64	37	20	66	60	45.57	28	63	2.203	1.139	0.0152506	0.0287693	0.0493	0.0846	0.0806	0.0806	TRUE	NA
MGG_16181	391	372	865	1094	381	370	949	1019	679.51	376	984	2.625	1.392	3.41701e-30	2.65268e-29	0	0.0061	0.0053	0.0053	TRUE	NA
MGG_16180	728	749	365	437	708	744	401	407	565.03	726	404	0.556	-0.847	6.02663e-11	2.48141e-10	0	0.0073	0.0061	0.0061	TRUE	NA
MGG_16179	728	833	831	1038	708	828	912	966	853.64	768	939	1.224	0.291	0.0106268	0.0206971	0.0055	0.005	0.0051	0.0051	TRUE	NA
MGG_16175	44	48	89	106	43	48	98	99	71.72	46	98	2.17	1.118	0.00170407	0.00375596	0	0.0539	0.045	0.045	TRUE	NA
MGG_16161	1055	946	1187	1419	1027	940	1303	1321	1147.63	984	1312	1.334	0.416	1.14022e-05	3.2281e-05	0.0009	0.0038	0.0034	0.0034	TRUE	NA
MGG_16160	511	507	700	793	497	504	768	738	626.9	500	753	1.505	0.589	1.40933e-06	4.344e-06	0	0.0066	0.0055	0.0055	TRUE	NA
MGG_16149	91873	89415	55604	65019	89412	88836	61026	60537	74952.6	89124	60782	0.682	-0.552	8.22851e-73	1.1898e-71	0	0.0005	0.0004	0.0004	TRUE	NA
MGG_16148	182	174	244	256	177	173	268	238	214.04	175	253	1.445	0.531	0.0102496	0.0200119	0	0.0184	0.0157	0.0157	TRUE	NA
MGG_16145	760	707	971	1103	740	702	1066	1027	883.68	721	1046	1.451	0.537	3.13416e-07	1.02344e-06	0	0.0048	0.0041	0.0041	TRUE	NA
MGG_16144	168	156	253	308	163	155	278	287	220.73	159	282	1.773	0.826	4.69445e-05	0.00012502	0	0.0179	0.0149	0.0149	TRUE	NA
MGG_16141	81	77	1154	1310	79	77	1267	1220	660.39	78	1244	16.001	4	1.55201e-138	3.91439e-137	0	0.0063	0.0055	0.0055	TRUE	NA
MGG_16134	92	122	39	56	90	121	43	52	76.42	106	48	0.452	-1.146	0.00140394	0.00313585	0.0227	0.0506	0.0466	0.0466	TRUE	NA
MGG_16133	5	2	85	115	5	2	93	107	51.8	4	100	29.156	4.866	3.74752e-13	1.72137e-12	0	0.0745	0.0675	0.0675	TRUE	NA
MGG_16131	87	69	340	390	85	69	373	363	222.37	77	368	4.802	2.264	1.40203e-24	9.4845e-24	0	0.0177	0.0157	0.0157	TRUE	NA
MGG_16126	1364	1445	2627	3177	1327	1436	2883	2958	2151.06	1382	2920	2.115	1.08	2.07766e-48	2.20268e-47	0.0009	0.0023	0.0021	0.0021	TRUE	NA
MGG_16125	333	294	357	454	324	292	392	423	357.67	308	408	1.323	0.403	0.0129764	0.0248355	0	0.0112	0.0098	0.0098	TRUE	NA
MGG_16116	376	319	203	300	366	317	223	279	296.24	342	251	0.737	-0.441	0.0189563	0.0350594	0.0139	0.0134	0.0135	0.0135	TRUE	NA
MGG_16103	1426	1490	958	1255	1388	1480	1051	1168	1272.01	1434	1110	0.775	-0.368	8.61625e-05	0.000223331	0.0029	0.0035	0.0034	0.0034	TRUE	NA
MGG_16096	943	941	424	454	918	935	465	423	685.17	926	444	0.479	-1.063	1.24097e-18	7.09577e-18	0	0.0061	0.0053	0.0053	TRUE	NA
MGG_16084	7	4	504	558	7	4	553	520	270.87	6	536	99.162	6.632	1.28282e-45	1.30012e-44	0	0.0146	0.0133	0.0133	TRUE	NA
MGG_16078	5	7	0	0	5	7	0	0	2.96	6	0	0.031	-4.99	0.0226339	0.0412262	0	1.297	1.2191	1.2191	TRUE	NA
MGG_16077	1423	1320	215	271	1385	1311	236	252	796.15	1348	244	0.181	-2.463	3.05574e-91	5.28275e-90	0	0.0053	0.0047	0.0047	TRUE	NA
MGG_16060	12	16	2573	3240	12	16	2824	3017	1467.03	14	2920	212.187	7.729	1.31652e-162	4.01758e-161	0	0.0031	0.003	0.003	TRUE	NA
MGG_16058	0	2	9	13	0	2	10	12	5.99	1	11	11.147	3.479	0.0231139	0.0420519	0	0.6399	0.5826	0.5826	TRUE	NA
MGG_16055	146	111	53	73	142	110	58	68	94.63	126	63	0.501	-0.998	0.00178129	0.00391056	0	0.041	0.0371	0.0371	TRUE	NA
MGG_16053	6261	5849	4598	5657	6093	5811	5046	5267	5554.44	5952	5156	0.867	-0.207	7.67136e-05	0.000199919	0.0007	0.0012	0.0011	0.0011	TRUE	NA
MGG_16043	1	0	20	12	1	0	22	11	8.52	0	16	33.597	5.07	0.00344532	0.00727037	0	0.45	0.4178	0.4178	TRUE	NA
MGG_16038	195	168	761	878	190	167	835	817	502.34	178	826	4.631	2.211	1.5353e-50	1.68258e-49	0	0.0081	0.0071	0.0071	TRUE	NA
MGG_16034	1584	1709	9197	10277	1542	1698	10094	9569	5725.45	1620	9832	6.07	2.602	0	0	0.0023	0.0012	0.0013	0.0013	TRUE	NA
MGG_16033	68	78	174	214	66	77	191	199	133.47	72	195	2.718	1.442	7.06893e-08	2.41691e-07	0	0.0292	0.025	0.025	TRUE	NA
MGG_16029	18	7	0	0	18	7	0	0	6.12	12	0	0.015	-6.041	0.0011564	0.00261671	0.4983	0.6267	0.6204	0.6204	TRUE	NA
MGG_16027	13	9	30	38	13	9	33	35	22.47	11	34	3.163	1.661	0.0109363	0.021255	0	0.171	0.1444	0.1444	TRUE	NA
MGG_16026	1	1	6	20	1	1	7	19	6.79	1	13	12.884	3.688	0.0129524	0.0248057	0	0.5645	0.5179	0.5179	TRUE	NA
MGG_16021	369	347	223	260	359	345	245	242	297.67	352	244	0.692	-0.532	0.00225628	0.00488824	0	0.0134	0.0111	0.0111	TRUE	NA
MGG_15993	74	96	18	21	72	95	20	20	51.68	84	20	0.235	-2.09	3.43383e-06	1.01753e-05	0	0.0746	0.0658	0.0658	TRUE	NA
MGG_15992	549	523	1541	1763	534	520	1691	1641	1096.66	527	1666	3.162	1.661	1.73568e-64	2.3018e-63	0	0.004	0.0034	0.0034	TRUE	NA
MGG_15991	4156	4476	17066	20952	4045	4447	18730	19508	11682.3	4246	19119	4.504	2.171	0	0	0.0024	0.0008	0.001	0.001	TRUE	NA
MGG_15990	6882	6331	10372	11796	6698	6290	11383	10983	8838.45	6494	11183	1.722	0.784	4.86039e-61	6.17868e-60	0.0011	0.0009	0.001	0.001	TRUE	NA
MGG_15989	497	449	804	859	484	446	882	800	652.99	465	841	1.808	0.854	7.95774e-12	3.43529e-11	0.0026	0.0064	0.0058	0.0058	TRUE	NA
MGG_15988	8163	8226	10676	12543	7944	8173	11717	11678	9878.09	8058	11698	1.452	0.538	2.33622e-37	2.08973e-36	0	0.0009	0.0007	0.0007	TRUE	NA
MGG_15977	683	734	446	490	665	729	489	456	584.91	697	472	0.678	-0.561	1.54026e-05	4.3153e-05	0	0.007	0.0063	0.0063	TRUE	NA
MGG_15974	7	11	34	50	7	11	37	47	25.4	9	42	4.739	2.245	0.000501781	0.00118698	0	0.1513	0.1324	0.1324	TRUE	NA
MGG_15971	261	200	136	160	254	199	149	149	187.74	226	149	0.659	-0.603	0.00839207	0.016686	0.0117	0.0209	0.0195	0.0195	TRUE	NA
MGG_15961	1044	937	693	744	1016	931	761	693	850.06	974	727	0.746	-0.423	0.000134797	0.000340444	0.0029	0.005	0.0047	0.0047	TRUE	NA
MGG_15960	199	216	280	424	194	215	307	395	277.59	204	351	1.723	0.785	5.92766e-05	0.000156209	0.0157	0.0143	0.0145	0.0145	TRUE	NA
MGG_15936	445	403	66	90	433	400	72	84	247.43	416	78	0.188	-2.411	7.8457e-30	6.04825e-29	0	0.016	0.0141	0.0141	TRUE	NA
MGG_15933	2	1	29	24	2	1	32	22	14.28	2	27	18.345	4.197	0.00015321	0.000384663	0	0.2688	0.2382	0.2382	TRUE	NA
MGG_15920	44	53	16	22	43	53	18	20	33.38	48	19	0.399	-1.324	0.0123357	0.0237615	0	0.1153	0.0977	0.0977	TRUE	NA
MGG_15912	28	23	2	3	27	23	2	3	13.77	25	2	0.1	-3.32	0.000676782	0.00157398	0	0.2787	0.2374	0.2374	TRUE	NA
MGG_15902	56	69	323	439	54	69	354	409	221.57	62	382	6.211	2.635	9.69715e-30	7.45992e-29	0	0.0178	0.0167	0.0167	TRUE	NA
MGG_15901	2435	2509	7571	8975	2370	2493	8309	8356	5382.01	2432	8332	3.428	1.777	1.0274e-249	4.80917e-248	0	0.0012	0.0011	0.0011	TRUE	NA
MGG_15899	347	380	200	222	338	378	220	207	285.36	358	214	0.596	-0.748	3.85311e-05	0.000103515	0	0.0139	0.0121	0.0121	TRUE	NA
MGG_15895	6413	6220	4070	4641	6241	6180	4467	4321	5302.21	6210	4394	0.707	-0.5	5.81045e-23	3.77133e-22	0	0.0012	0.001	0.001	TRUE	NA
MGG_15888	291	257	165	138	283	255	181	128	212.03	269	154	0.573	-0.804	0.000357848	0.00086351	0.0242	0.0186	0.0193	0.0193	TRUE	NA
MGG_15887	12	14	1972	2243	12	14	2164	2088	1069.56	13	2126	166.313	7.378	3.57641e-136	8.9386e-135	0	0.0041	0.0037	0.0037	TRUE	NA
MGG_15885	543	504	618	707	528	501	678	658	591.43	514	668	1.298	0.377	0.00274885	0.00588956	0	0.007	0.0059	0.0059	TRUE	NA
MGG_15884	9	7	31	26	9	7	34	24	18.49	8	29	3.696	1.886	0.0100411	0.0196674	0	0.2078	0.1778	0.1778	TRUE	NA
MGG_15874	74	87	34	33	72	86	37	31	56.62	79	34	0.428	-1.223	0.00270214	0.00579509	0	0.0682	0.0588	0.0588	TRUE	NA
MGG_15873	102	101	31	40	99	100	34	37	67.72	100	36	0.358	-1.484	6.84483e-05	0.000179352	0	0.0571	0.0476	0.0476	TRUE	NA
MGG_15868	7845	7459	3470	4153	7635	7411	3808	3867	5680.15	7523	3838	0.51	-0.971	3.50313e-84	5.67434e-83	0	0.0012	0.001	0.001	TRUE	NA
MGG_15866	1371	1425	2183	2564	1334	1416	2396	2387	1883.29	1375	2392	1.739	0.799	6.6103e-26	4.64234e-25	0	0.0025	0.0022	0.0022	TRUE	NA
MGG_15861	18939	19023	12786	15468	18432	18900	14033	14402	16441.5	18666	14218	0.762	-0.393	1.39848e-24	9.4663e-24	0.0002	0.0007	0.0006	0.0006	TRUE	NA
MGG_15853	393	390	212	259	382	387	233	241	310.94	384	237	0.616	-0.7	4.28401e-05	0.000114701	0	0.0128	0.0106	0.0106	TRUE	NA
MGG_15852	905	889	691	774	881	883	758	721	810.75	882	740	0.838	-0.255	0.0185559	0.034388	0	0.0052	0.0044	0.0044	TRUE	NA
MGG_15846	48	66	18	26	47	66	20	24	39.06	56	22	0.393	-1.348	0.00674516	0.0136472	0	0.0986	0.0873	0.0873	TRUE	NA
MGG_15837	699	552	407	402	680	548	447	374	512.42	614	410	0.667	-0.584	0.000141344	0.000356245	0.0174	0.008	0.0093	0.0093	TRUE	NA
MGG_15825	906	998	1405	1591	882	992	1542	1481	1224.15	937	1512	1.614	0.69	4.24783e-13	1.94713e-12	0.0027	0.0036	0.0035	0.0035	TRUE	NA
MGG_15824	16	13	38	36	16	13	42	34	25.93	14	38	2.636	1.398	0.0198905	0.0366034	0	0.1483	0.1252	0.1252	TRUE	NA
MGG_15817	1905	1923	2602	3313	1854	1911	2856	3085	2426.21	1882	2970	1.579	0.659	1.25272e-20	7.60792e-20	0.0014	0.0021	0.002	0.002	TRUE	NA
MGG_15814	4327	4471	4372	5322	4211	4442	4798	4955	4601.64	4326	4876	1.127	0.173	0.00166505	0.00367655	0.0007	0.0013	0.0012	0.0012	TRUE	NA
MGG_15809	113	84	38	60	110	83	42	56	72.75	96	49	0.506	-0.983	0.00743507	0.0149174	0.0251	0.0532	0.0493	0.0493	TRUE	NA
MGG_15807	1679	1953	950	1316	1634	1940	1043	1225	1460.57	1787	1134	0.635	-0.655	3.16504e-10	1.24961e-09	0.0124	0.0031	0.0045	0.0045	TRUE	NA
MGG_15787	0	0	23	19	0	0	25	18	10.73	0	22	118.469	6.888	4.15481e-05	0.000111376	0	0.3575	0.3334	0.3334	TRUE	NA
MGG_15775	136	120	197	224	132	119	216	209	169.09	126	212	1.688	0.755	0.00112644	0.00255519	0	0.0232	0.0195	0.0195	TRUE	NA
MGG_15774	23413	22863	14369	16918	22786	22715	15770	15752	19255.6	22750	15761	0.693	-0.53	4.06373e-50	4.42722e-49	0	0.0007	0.0006	0.0006	TRUE	NA
MGG_15770	60	52	19	14	58	52	21	13	35.99	55	17	0.306	-1.71	0.00116894	0.002644	0	0.107	0.0943	0.0943	TRUE	NA
MGG_15769	2092	2224	4980	6412	2036	2210	5466	5970	3920.28	2123	5718	2.695	1.43	1.38853e-105	2.69107e-104	0.003	0.0015	0.0017	0.0017	TRUE	NA
MGG_15759	917	920	671	799	892	914	736	744	821.71	903	740	0.82	-0.287	0.00730825	0.0146923	0	0.0052	0.0043	0.0043	TRUE	NA
MGG_15755	12	17	40	48	12	17	44	45	29.29	14	44	3.104	1.634	0.0043616	0.00908162	0	0.1313	0.112	0.112	TRUE	NA
MGG_15753	312	402	411	510	304	399	451	475	407.24	352	463	1.318	0.398	0.0164171	0.0307754	0.0162	0.0099	0.0107	0.0107	TRUE	NA
MGG_15751	104	110	23	35	101	109	25	33	67.08	105	29	0.276	-1.858	1.53561e-06	4.71875e-06	0	0.0576	0.0497	0.0497	TRUE	NA
MGG_15749	3926	3953	2405	2739	3821	3927	2639	2550	3234.48	3874	2594	0.67	-0.579	1.53115e-21	9.55087e-21	0	0.0017	0.0014	0.0014	TRUE	NA
MGG_15745	3594	3667	1987	2311	3498	3643	2181	2152	2868.35	3570	2166	0.607	-0.721	9.78476e-30	7.52207e-29	0	0.0018	0.0016	0.0016	TRUE	NA
MGG_15739	15868	15276	8447	10218	15443	15177	9271	9514	12351.1	15310	9392	0.614	-0.705	1.00188e-68	1.38868e-67	0.0001	0.0008	0.0007	0.0007	TRUE	NA
MGG_15737	142	143	90	77	138	142	99	72	112.68	140	86	0.606	-0.722	0.0134933	0.0257222	0.0108	0.0345	0.0316	0.0316	TRUE	NA
MGG_15732	429	442	2197	2575	418	439	2411	2397	1416.34	428	2404	5.614	2.489	3.08177e-160	9.20117e-159	0	0.0032	0.0027	0.0027	TRUE	NA
MGG_15731	170	157	237	300	165	156	260	279	215.21	160	270	1.679	0.748	0.000282221	0.000688233	0	0.0183	0.0154	0.0154	TRUE	NA
MGG_15725	285	318	904	1033	277	316	992	962	636.81	296	977	3.293	1.72	2.52847e-40	2.34539e-39	0.0001	0.0065	0.0059	0.0059	TRUE	NA
MGG_15724	3	2	25	35	3	2	27	33	16.23	2	30	12.23	3.612	0.000113242	0.000288578	0	0.2365	0.2037	0.2037	TRUE	NA
MGG_15723	1347	1229	949	944	1311	1221	1042	879	1113.1	1266	960	0.757	-0.401	0.00013873	0.000350058	0.0066	0.0039	0.0044	0.0044	TRUE	NA
MGG_15718	826	799	1262	1463	804	794	1385	1362	1086.22	799	1374	1.719	0.782	1.61144e-16	8.48096e-16	0	0.004	0.0033	0.0033	TRUE	NA
MGG_15705	556	560	253	372	541	556	278	346	430.38	548	312	0.57	-0.811	2.22903e-07	7.35707e-07	0.0083	0.0094	0.0093	0.0093	TRUE	NA
MGG_15700	22024	20432	361020	414477	21434	20300	396221	385905	205965	20867	391063	18.74	4.228	0	0	0.0009	0.0005	0.0006	0.0006	TRUE	NA
MGG_15689	27	22	195	246	26	22	214	229	122.8	24	222	9.203	3.202	4.26655e-23	2.78069e-22	0	0.0317	0.0276	0.0276	TRUE	NA
MGG_15688	4685	4455	2055	2284	4560	4426	2255	2127	3341.89	4493	2191	0.487	-1.037	4.69413e-63	6.08639e-62	0.0006	0.0016	0.0015	0.0015	TRUE	NA
MGG_15685	55	50	508	549	54	50	558	511	292.97	52	534	10.348	3.371	8.90326e-55	1.04189e-53	0	0.0136	0.012	0.012	TRUE	NA
MGG_15679	0	0	15	22	0	0	16	20	9.24	0	18	102.246	6.676	9.79661e-05	0.000251916	0	0.4153	0.3836	0.3836	TRUE	NA
MGG_15675	1891	1896	2715	3235	1840	1884	2980	3012	2428.95	1862	2996	1.609	0.686	1.24791e-24	8.45743e-24	0	0.0021	0.0017	0.0017	TRUE	NA
MGG_15672	3465	3298	3948	4703	3372	3277	4333	4379	3840.14	3324	4356	1.31	0.39	3.99862e-12	1.75917e-11	0	0.0015	0.0013	0.0013	TRUE	NA
MGG_15670	596	682	781	972	580	678	857	905	754.94	629	881	1.402	0.487	4.54219e-05	0.000121173	0.0051	0.0056	0.0055	0.0055	TRUE	NA
MGG_15669	206	219	832	896	200	218	913	834	541.36	209	874	4.178	2.063	1.65432e-47	1.7176e-46	0	0.0076	0.0068	0.0068	TRUE	NA
MGG_15668	696	746	932	1134	677	741	1023	1056	874.31	709	1040	1.466	0.552	2.55662e-07	8.40063e-07	0	0.0049	0.0043	0.0043	TRUE	NA
MGG_15667	353	268	195	216	344	266	214	201	256.23	305	208	0.68	-0.556	0.00560624	0.011471	0.0144	0.0154	0.0153	0.0153	TRUE	NA
MGG_15656	15	10	39	34	15	10	43	32	24.75	12	38	3.027	1.598	0.0109242	0.0212355	0	0.1553	0.1356	0.1356	TRUE	NA
MGG_15646	297	332	183	216	289	330	201	201	255.21	310	201	0.65	-0.622	0.00114228	0.00258899	0	0.0155	0.0135	0.0135	TRUE	NA
MGG_15644	69	79	408	494	67	78	448	460	263.34	72	454	6.236	2.641	1.28326e-36	1.1341e-35	0	0.015	0.0131	0.0131	TRUE	NA
MGG_15643	31	35	66	78	30	35	72	73	52.5	32	72	2.234	1.16	0.00539191	0.0110694	0	0.0735	0.0613	0.0613	TRUE	NA
MGG_15637	704	714	358	347	685	709	393	323	527.63	697	358	0.512	-0.965	1.1411e-11	4.88404e-11	0.0063	0.0078	0.0076	0.0076	TRUE	NA
MGG_15627	1062	1161	853	939	1034	1153	936	874	999.37	1094	905	0.827	-0.273	0.00851521	0.0169065	0.0033	0.0043	0.0042	0.0042	TRUE	NA
MGG_15621	317	281	345	456	309	279	379	425	347.72	294	402	1.368	0.452	0.00651776	0.0132126	0	0.0115	0.0103	0.0103	TRUE	NA
MGG_15618	1	1	77	103	1	1	85	96	45.59	1	90	91.799	6.52	3.06397e-09	1.14235e-08	0	0.0845	0.0756	0.0756	TRUE	NA
MGG_15617	5	1	281	317	5	1	308	295	152.35	3	302	102.325	6.677	4.15033e-26	2.9409e-25	0	0.0256	0.0233	0.0233	TRUE	NA
MGG_15612	1587	1265	4707	4847	1544	1257	5166	4513	3120.03	1400	4840	3.455	1.789	1.2097e-24	8.20351e-24	0.0142	0.0017	0.0033	0.0142	TRUE	NA
MGG_15606	7075	6874	7685	9171	6885	6829	8434	8539	7672.02	6857	8486	1.238	0.308	4.01419e-12	1.76532e-11	0	0.001	0.0008	0.0008	TRUE	NA
MGG_15601	22430	22586	43318	51100	21829	22440	47542	47577	34847	22134	47560	2.149	1.103	7.45074e-233	3.14154e-231	0.0001	0.0006	0.0005	0.0005	TRUE	NA
MGG_15599	281	216	99	114	273	215	109	106	175.72	244	108	0.44	-1.185	7.5409e-07	2.37809e-06	0.0126	0.0223	0.0208	0.0208	TRUE	NA
MGG_15577	9267	9304	20236	23954	9019	9244	22209	22303	15693.6	9132	22256	2.437	1.285	1.43127e-249	6.64338e-248	0	0.0007	0.0006	0.0006	TRUE	NA
MGG_15574	10	8	36	30	10	8	40	28	21.28	9	34	3.804	1.928	0.00497014	0.0102588	0	0.1805	0.1556	0.1556	TRUE	NA
MGG_15571	72	59	100	122	70	59	110	114	88.01	64	112	1.736	0.795	0.0132683	0.0253502	0	0.044	0.0374	0.0374	TRUE	NA
MGG_15569	384	353	231	263	374	351	254	245	305.71	362	250	0.688	-0.54	0.001769	0.00388511	0	0.013	0.011	0.011	TRUE	NA
MGG_15566	276	268	145	163	269	266	159	152	211.44	268	156	0.581	-0.784	0.000152195	0.000382287	0	0.0186	0.0155	0.0155	TRUE	NA
MGG_15565	1450	1597	2265	2539	1411	1587	2486	2364	1961.91	1499	2425	1.618	0.694	6.63109e-18	3.69036e-17	0.003	0.0024	0.0026	0.0026	TRUE	NA
MGG_15563	281	329	455	593	273	327	499	552	412.96	300	526	1.753	0.81	3.10996e-07	1.01584e-06	0.0072	0.0098	0.0094	0.0094	TRUE	NA
MGG_15554	1614	1757	1882	2156	1571	1746	2066	2007	1847.32	1658	2036	1.228	0.296	0.000218327	0.000538722	0.0024	0.0026	0.0025	0.0025	TRUE	NA
MGG_15551	1	0	14	15	1	0	15	14	7.58	0	14	29.839	4.899	0.0051839	0.0106761	0	0.5062	0.4459	0.4459	TRUE	NA
MGG_15537	2376	2284	2312	2821	2312	2269	2537	2627	2436.38	2290	2582	1.127	0.173	0.00994277	0.0194921	0	0.0021	0.0018	0.0018	TRUE	NA
MGG_15536	2757	2591	1616	1952	2683	2574	1774	1817	2212.09	2628	1796	0.683	-0.55	6.25246e-15	3.11974e-14	0	0.0022	0.0019	0.0019	TRUE	NA
MGG_15535	340	268	139	150	331	266	153	140	222.34	298	146	0.489	-1.033	1.28774e-06	3.98574e-06	0.0111	0.0177	0.0168	0.0168	TRUE	NA
MGG_15530	203	185	320	403	198	184	351	375	276.95	191	363	1.906	0.93	3.93096e-07	1.27235e-06	0	0.0143	0.0122	0.0122	TRUE	NA
MGG_15528	914	840	309	355	890	835	339	331	598.43	862	335	0.388	-1.365	3.62985e-26	2.57705e-25	0	0.0069	0.0059	0.0059	TRUE	NA
MGG_15527	1556	1398	1195	1264	1514	1389	1312	1177	1347.91	1452	1244	0.856	-0.224	0.0164505	0.0308328	0.004	0.0033	0.0034	0.0034	TRUE	NA
MGG_15517	1	7	23	26	1	7	25	24	14.34	4	24	6.26	2.646	0.00414487	0.00865565	0.1862	0.2676	0.2643	0.2643	TRUE	NA
MGG_15496	613	512	1138	1340	597	509	1249	1248	900.46	553	1248	2.258	1.175	4.83798e-26	3.42159e-25	0.0037	0.0048	0.0047	0.0047	TRUE	NA
MGG_15495	2306	2318	1007	1202	2244	2303	1105	1119	1692.89	2274	1112	0.489	-1.031	3.18377e-39	2.91877e-38	0	0.0028	0.0023	0.0023	TRUE	NA
MGG_15480	293	251	113	154	285	249	124	143	200.48	267	134	0.501	-0.997	5.62955e-06	1.63829e-05	0	0.0196	0.0175	0.0175	TRUE	NA
MGG_15445	78	55	27	35	76	55	30	33	48.19	66	32	0.477	-1.068	0.0159737	0.030036	0	0.08	0.0706	0.0706	TRUE	NA
MGG_15429	3837	3726	8652	9917	3734	3702	9496	9233	6541.27	3718	9364	2.518	1.332	9.12316e-170	2.91282e-168	0	0.0011	0.0009	0.0009	TRUE	NA
MGG_15428	68	54	25	23	66	54	27	21	42.17	60	24	0.406	-1.3	0.00610431	0.0124417	0	0.0914	0.079	0.079	TRUE	NA
MGG_15427	0	0	9	10	0	0	10	9	4.8	0	10	53.027	5.729	0.00303667	0.00646839	0	0.7992	0.7419	0.7419	TRUE	NA
MGG_15425	48	48	166	201	47	48	182	187	115.93	48	184	3.913	1.968	1.8663e-11	7.89623e-11	0	0.0335	0.0281	0.0281	TRUE	NA
MGG_15424	21	13	112	153	20	13	123	142	74.68	16	132	7.953	2.991	2.79605e-13	1.29184e-12	0	0.0518	0.0473	0.0473	TRUE	NA
MGG_15421	136	145	86	77	132	144	94	72	110.62	138	83	0.599	-0.739	0.0116109	0.0224633	0.0061	0.0351	0.0316	0.0316	TRUE	NA
MGG_15416	134	150	52	67	130	149	57	62	99.72	140	60	0.428	-1.224	6.56442e-05	0.000172373	0	0.0389	0.0332	0.0332	TRUE	NA
MGG_15415	93	77	24	37	91	77	26	34	56.95	84	30	0.365	-1.453	0.00042498	0.00101464	0	0.0678	0.0592	0.0592	TRUE	NA
MGG_15413	8	7	1006	1190	8	7	1104	1108	556.7	8	1106	149.987	7.229	4.61987e-76	6.92479e-75	0	0.0074	0.0066	0.0066	TRUE	NA
MGG_15409	6	2	44	58	6	2	48	54	27.53	4	51	13.034	3.704	5.32364e-07	1.70119e-06	0	0.1397	0.1271	0.1271	TRUE	NA
MGG_15402	1042	841	261	263	1014	836	286	245	595.24	925	266	0.287	-1.803	7.59322e-35	6.49244e-34	0.0138	0.0069	0.0079	0.0079	TRUE	NA
MGG_15394	221	201	111	139	215	200	122	129	166.5	208	126	0.606	-0.722	0.00196313	0.004291	0	0.0235	0.0198	0.0198	TRUE	NA
MGG_15381	1	0	20	8	1	0	22	7	7.59	0	14	29.777	4.896	0.00599776	0.0122336	0	0.5051	0.4953	0.4953	TRUE	NA
MGG_15369	1	8	392	611	1	8	430	569	252.01	4	500	112.334	6.812	1.12413e-11	4.81702e-11	0.372	0.0157	0.0181	0.372	TRUE	NA
MGG_15354	1463	1384	349	395	1424	1375	383	368	887.41	1400	376	0.268	-1.899	6.5137e-67	8.89455e-66	0	0.0048	0.0041	0.0041	TRUE	NA
MGG_15353	3325	3206	742	815	3236	3185	814	759	1998.58	3210	786	0.245	-2.031	3.42843e-149	9.37471e-148	0	0.0024	0.0021	0.0021	TRUE	NA
MGG_15350	28	32	61	70	27	32	67	65	47.79	30	66	2.238	1.162	0.00781452	0.0156305	0	0.0807	0.0674	0.0674	TRUE	NA
MGG_15344	1134	1029	18	16	1104	1022	20	15	540.15	1063	18	0.016	-5.954	2.15899e-102	4.03559e-101	0	0.0076	0.007	0.007	TRUE	NA
MGG_15340	22	13	1302	1489	21	13	1429	1386	712.41	17	1408	81.812	6.354	5.03134e-125	1.17757e-123	0	0.0059	0.0054	0.0054	TRUE	NA
MGG_15339	210	249	138	169	204	247	151	157	190.14	226	154	0.684	-0.548	0.0140781	0.0267125	0	0.0206	0.0185	0.0185	TRUE	NA
MGG_15331	160	145	412	433	156	144	452	403	288.77	150	428	2.851	1.511	4.30806e-16	2.23643e-15	0	0.0138	0.0121	0.0121	TRUE	NA
MGG_15330	3	1	79	106	3	1	87	99	47.33	2	93	47.201	5.561	1.82934e-11	7.74579e-11	0	0.0815	0.0735	0.0735	TRUE	NA
MGG_15325	5265	5297	3242	3976	5124	5263	3558	3702	4411.67	5194	3630	0.699	-0.516	3.56026e-21	2.19354e-20	0.0003	0.0014	0.0012	0.0012	TRUE	NA
MGG_15324	224	255	355	326	218	253	390	304	291.12	236	347	1.468	0.554	0.00403523	0.00843786	0.0181	0.0137	0.0143	0.0143	TRUE	NA
MGG_15323	2263	2226	1637	1879	2202	2212	1797	1749	1990.01	2207	1773	0.803	-0.316	1.26256e-05	3.56076e-05	0	0.0024	0.002	0.002	TRUE	NA
MGG_15295	347	313	227	250	338	311	249	233	282.64	324	241	0.742	-0.43	0.0171237	0.031986	0	0.0141	0.012	0.012	TRUE	NA
MGG_15294	1324	1212	371	393	1289	1204	407	366	816.44	1246	386	0.31	-1.691	5.4303e-48	5.69151e-47	0.0019	0.0052	0.0048	0.0048	TRUE	NA
MGG_15293	189	197	267	307	184	196	293	286	239.63	190	290	1.525	0.608	0.00172523	0.0037973	0	0.0165	0.0138	0.0138	TRUE	NA
MGG_15291	4742	4775	7126	8394	4615	4744	7821	7815	6248.81	4680	7818	1.671	0.74	4.61113e-54	5.35638e-53	0	0.0011	0.0009	0.0009	TRUE	NA
MGG_15290	1848	1967	1014	1308	1798	1954	1113	1218	1520.86	1876	1166	0.622	-0.686	6.19896e-15	3.09584e-14	0.003	0.003	0.003	0.003	TRUE	NA
MGG_15288	1955	1994	1032	1086	1903	1981	1133	1011	1506.87	1942	1072	0.551	-0.859	1.31758e-22	8.44276e-22	0.0026	0.003	0.003	0.003	TRUE	NA
MGG_15285	955	866	1247	1578	929	860	1369	1469	1156.9	894	1419	1.586	0.666	4.27688e-12	1.87636e-11	0.0018	0.0038	0.0035	0.0035	TRUE	NA
MGG_15281	346	311	156	207	337	309	171	193	252.41	323	182	0.564	-0.825	1.98168e-05	5.48663e-05	0	0.0157	0.0137	0.0137	TRUE	NA
MGG_15280	2127	1845	3549	3908	2070	1833	3895	3639	2859.18	1952	3767	1.929	0.948	1.78867e-38	1.6183e-37	0.0041	0.0018	0.0022	0.0022	TRUE	NA
MGG_15278	0	0	14	24	0	0	15	22	9.43	0	18	104.441	6.707	8.90084e-05	0.000229952	0	0.4069	0.3804	0.3804	TRUE	NA
MGG_15277	11123	11290	23466	28499	10825	11217	25754	26534	18582.6	11021	26144	2.372	1.246	1.03502e-225	4.23475e-224	0.0004	0.0007	0.0007	0.0007	TRUE	NA
MGG_15272	360	281	632	740	350	279	694	689	503.04	314	692	2.195	1.135	1.56352e-14	7.66633e-14	0.0082	0.0081	0.0082	0.0082	TRUE	NA
MGG_15271	4	5	31	35	4	5	34	33	18.87	4	34	7.521	2.911	0.000221276	0.000545268	0	0.2036	0.1722	0.1722	TRUE	NA
MGG_15267	143	130	41	57	139	129	45	53	91.6	134	49	0.366	-1.449	7.14191e-06	2.05674e-05	0	0.0423	0.0361	0.0361	TRUE	NA
MGG_15266	39	56	261	267	38	56	286	249	157.16	47	268	5.717	2.515	7.50875e-20	4.45724e-19	0.0156	0.0249	0.0241	0.0241	TRUE	NA
MGG_15257	102	80	171	161	99	79	188	150	129.08	89	169	1.885	0.914	0.000959428	0.00219391	0.0168	0.0302	0.0283	0.0283	TRUE	NA
MGG_15251	162	164	367	417	158	163	403	388	277.91	160	396	2.467	1.303	1.50013e-12	6.70657e-12	0	0.0143	0.0119	0.0119	TRUE	NA
MGG_15250	144	133	28	29	140	132	31	27	82.5	136	29	0.211	-2.241	3.19536e-10	1.26023e-09	0	0.0469	0.0399	0.0399	TRUE	NA
MGG_15249	186	154	35	57	181	153	38	53	106.38	167	46	0.275	-1.861	3.60456e-09	1.33758e-08	0.0127	0.0365	0.0338	0.0338	TRUE	NA
MGG_15248	208	172	88	91	202	171	97	85	138.66	186	91	0.485	-1.045	6.97078e-05	0.000182479	0	0.0281	0.0249	0.0249	TRUE	NA
MGG_15245	1394	1279	1468	1656	1357	1271	1611	1542	1445.09	1314	1576	1.2	0.263	0.00212447	0.00462079	0.0008	0.0031	0.0028	0.0028	TRUE	NA
MGG_15242	1	0	10	23	1	0	11	21	8.34	0	16	33.078	5.048	0.00369567	0.00776013	0	0.4599	0.4262	0.4262	TRUE	NA
MGG_15239	377	387	118	157	367	384	130	146	256.77	376	138	0.368	-1.444	1.26887e-13	5.96729e-13	0	0.0154	0.0133	0.0133	TRUE	NA
MGG_15238	942	1020	1637	1867	917	1013	1797	1738	1366.27	965	1768	1.831	0.873	2.5781e-22	1.64057e-21	0.0016	0.0033	0.0031	0.0031	TRUE	NA
MGG_15233	60	55	114	147	58	55	125	137	93.75	56	131	2.319	1.213	0.000109945	0.000280693	0	0.0414	0.0347	0.0347	TRUE	NA
MGG_15227	801	828	502	640	780	823	551	596	687.25	802	574	0.716	-0.481	5.34791e-05	0.000141641	0	0.0061	0.0053	0.0053	TRUE	NA
MGG_15211	1	0	11	8	1	0	12	7	5.12	0	10	19.823	4.309	0.0224182	0.0408535	0	0.7483	0.6639	0.6639	TRUE	NA
MGG_15205	28	42	67	67	27	42	74	62	51.22	34	68	1.969	0.978	0.0239588	0.0434174	0.0187	0.0753	0.0684	0.0684	TRUE	NA
MGG_15203	151	140	69	87	147	139	76	81	110.69	143	78	0.548	-0.867	0.00240318	0.00518413	0	0.0351	0.0293	0.0293	TRUE	NA
MGG_15188	4	1	347	327	4	1	381	304	172.54	2	342	139.29	7.122	1.92262e-25	1.33412e-24	0	0.0227	0.0227	0.0227	TRUE	NA
MGG_15175	989	1077	1568	1868	963	1070	1721	1739	1373.16	1016	1730	1.703	0.768	9.78666e-18	5.40566e-17	0.0016	0.0033	0.0031	0.0031	TRUE	NA
MGG_15156	2377	2370	1813	2289	2313	2355	1990	2131	2197.24	2334	2060	0.883	-0.179	0.0126752	0.0243532	0.0007	0.0022	0.002	0.002	TRUE	NA
MGG_15154	8414	8068	11180	13319	8189	8016	12270	12401	10218.8	8102	12336	1.523	0.606	2.37957e-48	2.51792e-47	0	0.0009	0.0007	0.0007	TRUE	NA
MGG_15146	221	204	2471	2884	215	203	2712	2685	1453.72	209	2698	12.916	3.691	8.1984e-273	4.19295e-271	0	0.0031	0.0027	0.0027	TRUE	NA
MGG_15140	3067	3053	4896	5730	2985	3033	5373	5335	4181.61	3009	5354	1.779	0.831	9.47555e-53	1.08586e-51	0	0.0014	0.0012	0.0012	TRUE	NA
MGG_15138	2392	2249	5835	6961	2328	2234	6404	6481	4361.86	2281	6442	2.824	1.498	1.85606e-160	5.55662e-159	0	0.0014	0.0012	0.0012	TRUE	NA
MGG_15136	1409	1333	1621	2007	1371	1324	1779	1869	1585.83	1348	1824	1.354	0.437	7.58437e-08	2.59074e-07	0	0.0029	0.0025	0.0025	TRUE	NA
MGG_15133	977	925	210	249	951	919	230	232	583.04	935	231	0.247	-2.016	7.4339e-51	8.19584e-50	0	0.0071	0.006	0.006	TRUE	NA
MGG_15118	1632	1563	1067	1285	1588	1553	1171	1196	1377.15	1570	1184	0.754	-0.408	1.61407e-06	4.9447e-06	0	0.0033	0.0027	0.0027	TRUE	NA
MGG_15115	9	24	4	0	9	24	4	0	9.25	16	2	0.129	-2.954	0.0169362	0.0316682	1.2973	0.4148	0.4644	0.4644	TRUE	NA
MGG_15114	0	1	55	58	0	1	60	54	28.84	0	57	116.203	6.861	7.22089e-06	2.07895e-05	0	0.1333	0.1196	0.1196	TRUE	NA
MGG_15107	11	2	0	0	11	2	0	0	3.17	6	0	0.029	-5.094	0.020906	0.0383253	2.1659	1.208	1.2597	1.2597	TRUE	NA
MGG_15100	58635	53967	5353	5898	57064	53617	5875	5491	30512	55340	5683	0.103	-3.284	0	0	0.0019	0.0006	0.0008	0.0008	TRUE	NA
MGG_15094	234	222	44	28	228	221	48	26	130.66	224	37	0.164	-2.609	6.65619e-17	3.56427e-16	0.0489	0.0298	0.0309	0.0309	TRUE	NA
MGG_15093	298	259	67	31	290	257	74	29	162.43	274	52	0.186	-2.424	8.37731e-05	0.000217342	0.1707	0.0241	0.0364	0.1707	TRUE	NA
MGG_15090	1024	1003	1274	1500	997	997	1398	1397	1196.97	997	1398	1.402	0.488	6.10591e-08	2.09674e-07	0	0.0037	0.003	0.003	TRUE	NA
MGG_15083	899	974	2617	3016	875	968	2872	2808	1880.72	922	2840	3.083	1.624	7.4262e-91	1.27784e-89	0.0012	0.0025	0.0024	0.0024	TRUE	NA
MGG_15081	144	159	213	218	140	158	234	203	183.71	149	218	1.464	0.549	0.0148776	0.0281185	0	0.0214	0.0188	0.0188	TRUE	NA
MGG_15079	647	632	300	332	630	628	329	309	473.98	629	319	0.507	-0.979	4.09236e-12	1.79826e-11	0	0.0086	0.0072	0.0072	TRUE	NA
MGG_15078	2233	1839	2633	3000	2173	1827	2890	2793	2420.8	2000	2842	1.42	0.506	5.7368e-10	2.22133e-09	0.0069	0.0021	0.0028	0.0028	TRUE	NA
MGG_15076	2672	2529	2726	3263	2600	2513	2992	3038	2785.73	2556	3015	1.179	0.238	0.000182387	0.000454581	0	0.0019	0.0016	0.0016	TRUE	NA
MGG_15075	347	302	201	211	338	300	221	196	263.7	319	208	0.653	-0.615	0.00121267	0.00273619	0	0.015	0.0134	0.0134	TRUE	NA
MGG_15072	6554	6313	4429	5233	6378	6272	4861	4872	5595.91	6325	4866	0.769	-0.378	1.12736e-14	5.55978e-14	0	0.0012	0.001	0.001	TRUE	NA
MGG_15070	133	114	39	54	129	113	43	50	83.94	121	46	0.384	-1.379	4.26868e-05	0.000114318	0	0.0461	0.0397	0.0397	TRUE	NA
MGG_15066	18	8	47	49	18	8	52	46	30.67	13	49	3.808	1.929	0.00104159	0.00237051	0.0176	0.1254	0.1173	0.1173	TRUE	NA
MGG_15065	121	108	292	280	118	107	320	261	201.56	112	290	2.578	1.366	1.17302e-09	4.48074e-09	0.0101	0.0195	0.0181	0.0181	TRUE	NA
MGG_15064	161	148	198	278	157	147	217	259	194.97	152	238	1.57	0.65	0.00313539	0.00666474	0	0.0201	0.0179	0.0179	TRUE	NA
MGG_15060	510	443	1942	2477	496	440	2131	2306	1343.52	468	2218	4.739	2.245	1.84854e-115	3.98844e-114	0.0035	0.0033	0.0034	0.0034	TRUE	NA
MGG_15049	68	75	197	256	66	75	216	238	148.81	70	227	3.234	1.693	4.69988e-11	1.94601e-10	0	0.0262	0.0226	0.0226	TRUE	NA
MGG_15048	562	521	1301	1467	547	518	1428	1366	964.57	532	1397	2.623	1.391	3.73569e-41	3.53021e-40	0	0.0045	0.0039	0.0039	TRUE	NA
MGG_15043	45	32	97	86	44	32	106	80	65.53	38	93	2.462	1.3	0.000868051	0.00199363	0.0276	0.059	0.0547	0.0547	TRUE	NA
MGG_15038	3235	3118	1360	1419	3148	3098	1493	1321	2264.98	3123	1407	0.45	-1.152	1.12695e-51	1.26006e-50	0.0027	0.0022	0.0023	0.0023	TRUE	NA
MGG_15036	2548	2605	1304	1603	2480	2588	1431	1492	1997.88	2534	1462	0.577	-0.793	1.51969e-26	1.09155e-25	0	0.0024	0.0021	0.0021	TRUE	NA
MGG_15034	1190	1128	722	831	1158	1121	792	774	961.23	1140	783	0.687	-0.542	6.66534e-08	2.28246e-07	0	0.0045	0.0038	0.0038	TRUE	NA
MGG_15027	1620	1645	888	948	1577	1634	975	883	1267.05	1606	929	0.578	-0.791	1.23384e-17	6.78794e-17	0.0016	0.0035	0.0033	0.0033	TRUE	NA
MGG_15026	573	531	1635	1851	558	528	1794	1723	1150.76	543	1758	3.24	1.696	1.61501e-68	2.23572e-67	0	0.0038	0.0033	0.0033	TRUE	NA
MGG_15025	672	784	2252	2557	654	779	2472	2381	1571.31	716	2426	3.387	1.76	1.61974e-79	2.51663e-78	0.0061	0.0029	0.0033	0.0033	TRUE	NA
MGG_15024	369	361	278	250	359	359	305	233	313.91	359	269	0.747	-0.42	0.021834	0.0399008	0.0139	0.0127	0.0129	0.0129	TRUE	NA
MGG_15023	366	340	187	202	356	338	205	188	271.83	347	196	0.566	-0.821	8.8745e-06	2.54047e-05	0	0.0146	0.0124	0.0124	TRUE	NA
MGG_15019	907	816	661	741	883	811	725	690	777.2	847	708	0.835	-0.26	0.0215036	0.0393491	0	0.0054	0.0048	0.0048	TRUE	NA
MGG_15018	2214	2070	5684	6553	2155	2057	6238	6101	4137.69	2106	6170	2.93	1.551	5.77516e-162	1.74789e-160	0.0002	0.0014	0.0013	0.0013	TRUE	NA
MGG_15015	3118	2683	3160	3403	3034	2666	3468	3168	3084.16	2850	3318	1.164	0.219	0.00326653	0.00691424	0.0056	0.0017	0.0023	0.0023	TRUE	NA
MGG_15011	43604	41977	57915	67280	42436	41705	63562	62642	52586.3	42070	63102	1.5	0.585	5.41092e-74	7.91714e-73	0.0001	0.0006	0.0005	0.0005	TRUE	NA
MGG_15008	516	432	723	836	502	429	793	778	625.81	466	786	1.687	0.755	4.46965e-09	1.64752e-08	0.0037	0.0066	0.0062	0.0062	TRUE	NA
MGG_15005	1541	1378	1703	1953	1500	1369	1869	1818	1639.05	1434	1844	1.285	0.362	1.1517e-05	3.25808e-05	0.0015	0.0028	0.0026	0.0026	TRUE	NA
MGG_15001	36	42	14	9	35	42	15	8	25.13	38	12	0.306	-1.706	0.00694069	0.014012	0	0.153	0.1361	0.1361	TRUE	NA
MGG_14990	7	9	36	38	7	9	40	35	22.66	8	38	4.753	2.249	0.000871036	0.00199996	0	0.1696	0.1433	0.1433	TRUE	NA
MGG_14989	19	10	43	61	18	10	47	57	33.1	14	52	3.658	1.871	0.000824293	0.00189747	0.0114	0.1162	0.1061	0.1061	TRUE	NA
MGG_14988	37	24	168	251	36	24	184	234	119.48	30	209	6.986	2.805	7.8154e-18	4.332e-17	0.0292	0.0326	0.0322	0.0322	TRUE	NA
MGG_14976	2598	2427	1415	1515	2528	2411	1553	1411	1975.8	2470	1482	0.599	-0.738	3.79809e-21	2.33616e-20	0.0022	0.0024	0.0024	0.0024	TRUE	NA
MGG_14970	822	746	303	362	800	741	333	337	552.68	770	335	0.435	-1.202	1.98899e-19	1.16812e-18	0	0.0074	0.0064	0.0064	TRUE	NA
MGG_14969	1127	1074	603	755	1097	1067	662	703	882.15	1082	682	0.631	-0.664	2.91258e-10	1.152e-09	0	0.0048	0.0041	0.0041	TRUE	NA
MGG_14966	3401	3368	148255	169344	3310	3346	162710	157670	81759.2	3328	160190	48.134	5.589	0	0	0.0003	0.0005	0.0005	0.0005	TRUE	NA
MGG_14956	1099	1000	347	485	1070	994	381	452	723.87	1032	416	0.404	-1.307	1.27161e-25	8.86278e-25	0.0059	0.0058	0.0058	0.0058	TRUE	NA
MGG_14943	118	147	384	439	115	146	421	409	272.77	130	415	3.183	1.67	1.6948e-17	9.26394e-17	0.003	0.0145	0.0135	0.0135	TRUE	NA
MGG_14939	298	288	93	95	290	286	102	88	191.67	288	95	0.33	-1.6	1.51869e-12	6.7868e-12	0	0.0205	0.0176	0.0176	TRUE	NA
MGG_14937	9668	9078	3389	3911	9409	9019	3719	3641	6447.26	9214	3680	0.399	-1.324	1.13528e-157	3.30909e-156	0.0005	0.0011	0.001	0.001	TRUE	NA
MGG_14936	185	173	113	105	180	172	124	98	143.43	176	111	0.628	-0.67	0.00905637	0.0179069	0	0.0272	0.0243	0.0243	TRUE	NA
MGG_14931	1837	1880	1325	1562	1788	1868	1454	1454	1641.03	1828	1454	0.796	-0.33	3.15632e-05	8.56073e-05	0	0.0028	0.0024	0.0024	TRUE	NA
MGG_14930	246	245	85	92	239	243	93	86	165.44	241	90	0.37	-1.434	2.14533e-09	8.05282e-09	0	0.0237	0.0199	0.0199	TRUE	NA
MGG_14929	82	79	29	26	80	78	32	24	53.58	79	28	0.353	-1.504	0.00037517	0.00090255	0	0.072	0.0616	0.0616	TRUE	NA
MGG_14928	84	97	5	14	82	96	5	13	49.16	89	9	0.106	-3.237	8.18031e-10	3.14101e-09	0.0075	0.0784	0.0745	0.0745	TRUE	NA
MGG_14921	228	274	158	169	222	272	173	157	206.22	247	165	0.669	-0.58	0.00756706	0.0151712	0.0091	0.0191	0.0176	0.0176	TRUE	NA
MGG_14917	290	252	557	525	282	250	611	489	408.18	266	550	2.062	1.044	3.37881e-10	1.32784e-09	0.0143	0.0099	0.0105	0.0105	TRUE	NA
MGG_14916	157	155	209	225	153	154	229	209	186.41	154	219	1.429	0.515	0.0190179	0.0351675	0	0.021	0.0177	0.0177	TRUE	NA
MGG_14914	344	332	173	189	335	330	190	176	257.62	332	183	0.55	-0.863	4.94527e-06	1.44678e-05	0	0.0154	0.0129	0.0129	TRUE	NA
MGG_14913	6591	6922	4612	5686	6414	6877	5062	5294	5911.83	6646	5178	0.779	-0.36	2.04094e-11	8.61532e-11	0.0014	0.0011	0.0012	0.0012	TRUE	NA
MGG_14907	2547	2554	1244	1503	2479	2537	1365	1399	1945.23	2508	1382	0.551	-0.859	3.721e-31	2.94455e-30	0	0.0025	0.0021	0.0021	TRUE	NA
MGG_14905	3837	3577	2720	3266	3734	3554	2985	3041	3328.53	3644	3013	0.827	-0.274	5.92099e-06	1.71949e-05	0.0004	0.0016	0.0015	0.0015	TRUE	NA
MGG_14904	2813	2665	1900	2168	2738	2648	2085	2019	2372.3	2693	2052	0.762	-0.393	9.08588e-09	3.28119e-08	0	0.0021	0.0018	0.0018	TRUE	NA
MGG_14902	2992	3034	3358	3958	2912	3014	3685	3685	3324.19	2963	3685	1.244	0.315	1.16181e-07	3.91059e-07	0	0.0016	0.0014	0.0014	TRUE	NA
MGG_14901	1349	1266	1940	2166	1313	1258	2129	2017	1679.13	1286	2073	1.612	0.689	8.69116e-18	4.81259e-17	0	0.0028	0.0025	0.0025	TRUE	NA
MGG_14897	191	185	1076	1216	186	184	1181	1132	670.69	185	1156	6.255	2.645	8.02941e-89	1.35836e-87	0	0.0062	0.0053	0.0053	TRUE	NA
MGG_14892	2501	2559	3071	3841	2434	2542	3370	3576	2980.77	2488	3473	1.396	0.482	9.68067e-14	4.58194e-13	0.001	0.0018	0.0017	0.0017	TRUE	NA
MGG_14886	4498	4346	1041	1232	4378	4318	1143	1147	2746.23	4348	1145	0.263	-1.925	8.05889e-184	2.70597e-182	0	0.0019	0.0016	0.0016	TRUE	NA
MGG_14882	1100	966	1495	1752	1071	960	1641	1631	1325.57	1016	1636	1.611	0.688	3.84873e-14	1.85826e-13	0.0018	0.0034	0.0032	0.0032	TRUE	NA
MGG_14881	16	16	44	43	16	16	48	40	29.95	16	44	2.803	1.487	0.00787041	0.0157366	0	0.1284	0.1077	0.1077	TRUE	NA
MGG_14875	401	372	273	311	390	370	300	290	337.26	380	295	0.775	-0.368	0.0251405	0.045321	0	0.0119	0.0099	0.0099	TRUE	NA
MGG_14873	215	271	384	362	209	269	421	337	309.24	239	379	1.583	0.663	0.000584772	0.00137125	0.0246	0.0129	0.0145	0.0145	TRUE	NA
MGG_14872	328	379	1833	2360	319	377	2012	2197	1226.2	348	2104	6.054	2.598	5.84973e-130	1.39874e-128	0.0054	0.0036	0.0039	0.0039	TRUE	NA
MGG_14870	347	339	404	474	338	337	443	441	389.81	338	442	1.312	0.391	0.0101205	0.0198053	0	0.0103	0.0085	0.0085	TRUE	NA
MGG_14863	724	595	858	979	705	591	942	912	787.23	648	927	1.43	0.516	1.43016e-05	4.02113e-05	0.0062	0.0054	0.0055	0.0055	TRUE	NA
MGG_14860	529	475	222	295	515	472	244	275	376.27	494	260	0.526	-0.927	9.12828e-09	3.29435e-08	0	0.0107	0.0096	0.0096	TRUE	NA
MGG_14857	1275	1319	1417	1574	1241	1310	1555	1465	1392.99	1276	1510	1.183	0.243	0.00515959	0.01063	0.0009	0.0032	0.0029	0.0029	TRUE	NA
MGG_14852	476	470	690	864	463	467	757	804	622.98	465	780	1.68	0.748	1.41261e-09	5.36443e-09	0	0.0066	0.0056	0.0056	TRUE	NA
MGG_14850	1345	1391	954	1133	1309	1382	1047	1055	1198.22	1346	1051	0.781	-0.356	9.47664e-05	0.000244314	0	0.0037	0.0032	0.0032	TRUE	NA
MGG_14848	774	823	451	627	753	818	495	584	662.42	786	540	0.688	-0.54	2.48083e-05	6.81565e-05	0.0065	0.0063	0.0063	0.0063	TRUE	NA
MGG_14847	6172	6048	4986	5895	6007	6009	5472	5489	5744.07	6008	5480	0.912	-0.133	0.00598857	0.0122194	0	0.0012	0.0009	0.0009	TRUE	NA
MGG_14835	538	538	613	758	524	535	673	706	609.16	530	690	1.303	0.382	0.00201086	0.00438837	0	0.0068	0.0057	0.0057	TRUE	NA
MGG_14825	782	802	833	1030	761	797	914	959	857.77	779	936	1.203	0.267	0.0120468	0.0232497	0	0.005	0.0042	0.0042	TRUE	NA
MGG_14824	114	105	16	48	111	104	18	45	69.38	108	32	0.293	-1.773	2.56303e-05	7.02529e-05	0.1495	0.0557	0.0646	0.0646	TRUE	NA
MGG_14816	202	198	76	87	197	197	83	81	139.43	197	82	0.418	-1.259	1.03182e-06	3.21991e-06	0	0.028	0.0232	0.0232	TRUE	NA
MGG_14813	1027	1030	1467	1605	999	1023	1610	1494	1281.8	1011	1552	1.534	0.617	8.21328e-12	3.54422e-11	0	0.0035	0.0031	0.0031	TRUE	NA
MGG_14806	894	820	2777	3191	870	815	3048	2971	1925.88	842	3010	3.572	1.837	1.57322e-121	3.5468e-120	0	0.0025	0.0022	0.0022	TRUE	NA
MGG_14803	489	426	264	293	476	423	290	273	365.42	450	282	0.625	-0.678	2.87853e-05	7.84582e-05	0	0.011	0.0097	0.0097	TRUE	NA
MGG_14801	1428	1388	836	1014	1390	1379	918	944	1157.59	1384	931	0.673	-0.572	4.83455e-10	1.87723e-09	0	0.0038	0.0032	0.0032	TRUE	NA
MGG_14798	648	628	770	898	631	624	845	836	733.94	628	840	1.34	0.422	0.000180675	0.000450443	0	0.0057	0.0047	0.0047	TRUE	NA
MGG_14797	2707	2584	1201	1294	2634	2567	1318	1205	1931.16	2600	1262	0.485	-1.045	4.04087e-41	3.81534e-40	0.001	0.0025	0.0023	0.0023	TRUE	NA
MGG_14794	55	86	242	231	54	85	266	215	154.91	70	240	3.458	1.79	1.08481e-10	4.39778e-10	0.0486	0.0252	0.0277	0.0277	TRUE	NA
MGG_14792	48	37	255	282	47	37	280	263	156.47	42	272	6.491	2.699	4.45687e-23	2.9013e-22	0	0.025	0.0221	0.0221	TRUE	NA
MGG_14791	76	80	566	559	74	79	621	520	323.77	76	570	7.435	2.894	1.37269e-47	1.42923e-46	0	0.0123	0.0119	0.0119	TRUE	NA
MGG_14785	515	563	252	261	501	559	277	243	395.03	530	260	0.489	-1.032	1.09045e-10	4.41578e-10	0.0043	0.0102	0.0094	0.0094	TRUE	NA
MGG_14781	403	367	235	302	392	365	258	281	323.98	378	270	0.713	-0.488	0.00395946	0.00829355	0	0.0123	0.0106	0.0106	TRUE	NA
MGG_14778	284	285	1331	1482	276	283	1461	1380	850.04	280	1420	5.075	2.343	9.67289e-91	1.66184e-89	0	0.005	0.0044	0.0044	TRUE	NA
MGG_14777	56	36	383	396	54	36	420	369	219.83	45	394	8.725	3.125	9.80965e-36	8.51943e-35	0.0188	0.0179	0.018	0.018	TRUE	NA
MGG_14773	2685	2465	2667	2911	2613	2449	2927	2710	2674.87	2531	2818	1.113	0.154	0.0267578	0.0478926	0.0022	0.0019	0.002	0.002	TRUE	NA
MGG_14772	12254	12726	10311	12320	11926	12644	11316	11471	11839.1	12285	11394	0.928	-0.109	0.0124099	0.0238919	0.0007	0.0008	0.0008	0.0008	TRUE	NA
MGG_14767	1583	1513	1148	1228	1541	1503	1260	1143	1361.77	1522	1202	0.789	-0.342	0.000123501	0.00031306	0.0016	0.0033	0.0031	0.0031	TRUE	NA
MGG_14757	4231	4268	3123	3765	4118	4240	3428	3505	3822.75	4179	3466	0.83	-0.269	1.95302e-06	5.93862e-06	0	0.0015	0.0013	0.0013	TRUE	NA
MGG_14756	216	241	113	104	210	239	124	97	167.63	224	110	0.49	-1.03	2.35498e-05	6.4844e-05	0.0103	0.0234	0.0217	0.0217	TRUE	NA
MGG_14755	843	799	883	1063	820	794	969	990	893.27	807	980	1.214	0.279	0.00681504	0.013776	0	0.0048	0.004	0.004	TRUE	NA
MGG_14753	42	52	10	15	41	52	11	14	29.37	46	12	0.271	-1.885	0.00122732	0.00276584	0	0.131	0.1124	0.1124	TRUE	NA
MGG_14751	1139	1129	719	814	1108	1122	789	758	944.29	1115	774	0.693	-0.528	1.7134e-07	5.70118e-07	0	0.0046	0.0038	0.0038	TRUE	NA
MGG_14748	756	734	457	523	736	729	502	487	613.38	732	494	0.675	-0.568	3.99573e-06	1.17835e-05	0	0.0067	0.0056	0.0056	TRUE	NA
MGG_14747	700	584	756	866	681	580	830	806	724.37	630	818	1.296	0.375	0.00201534	0.00439641	0.0049	0.0058	0.0057	0.0057	TRUE	NA
MGG_14746	5082	5025	7208	8645	4946	4992	7911	8049	6474.55	4969	7980	1.606	0.684	6.19771e-48	6.48967e-47	0	0.0011	0.0009	0.0009	TRUE	NA
MGG_14744	390	360	137	165	380	358	150	154	260.3	369	152	0.412	-1.278	2.0281e-11	8.56437e-11	0	0.0152	0.0128	0.0128	TRUE	NA
MGG_14742	598	586	344	432	582	582	378	402	485.99	582	390	0.67	-0.577	2.99404e-05	8.14257e-05	0	0.0084	0.007	0.007	TRUE	NA
MGG_14736	11	11	41	56	11	11	45	52	29.69	11	48	4.495	2.168	0.000215388	0.000531827	0	0.1295	0.1091	0.1091	TRUE	NA
MGG_14735	1651	1540	1835	2162	1607	1530	2014	2013	1790.92	1568	2014	1.284	0.36	2.4973e-06	7.51503e-06	0	0.0026	0.0022	0.0022	TRUE	NA
MGG_14732	26	34	124	124	25	34	136	115	77.66	30	126	4.256	2.089	1.38944e-08	4.96255e-08	0	0.0498	0.0444	0.0444	TRUE	NA
MGG_14730	44	51	76	88	43	51	83	82	64.71	47	82	1.769	0.823	0.0273584	0.0488884	0	0.0597	0.0502	0.0502	TRUE	NA
MGG_14729	1683	1895	1259	1498	1638	1883	1382	1395	1574.28	1760	1388	0.789	-0.342	0.000116174	0.000295301	0.0044	0.0029	0.0031	0.0031	TRUE	NA
MGG_14718	1245	1209	957	993	1212	1201	1050	925	1096.92	1206	988	0.818	-0.291	0.00353482	0.00744928	0.0029	0.004	0.0038	0.0038	TRUE	NA
MGG_14717	504	450	288	349	490	447	316	325	394.65	468	320	0.684	-0.548	0.00037353	0.000898995	0	0.0102	0.0088	0.0088	TRUE	NA
MGG_14715	16950	16175	82226	95209	16496	16070	90243	88646	52863.8	16283	89444	5.493	2.458	0	0	0.0002	0.0006	0.0005	0.0005	TRUE	NA
MGG_14713	1362	1217	1511	1790	1326	1209	1658	1667	1464.89	1268	1662	1.312	0.391	5.20028e-06	1.51817e-05	0.0012	0.0031	0.0029	0.0029	TRUE	NA
MGG_14712	3223	2968	2345	2878	3137	2949	2574	2680	2834.67	3043	2627	0.863	-0.212	0.00127936	0.00287433	0.001	0.0018	0.0017	0.0017	TRUE	NA
MGG_14702	1044	1029	2544	2917	1016	1022	2792	2716	1886.58	1019	2754	2.702	1.434	4.56724e-79	7.06643e-78	0	0.0025	0.0021	0.0021	TRUE	NA
MGG_14700	284	269	134	175	276	267	147	163	213.41	272	155	0.571	-0.809	9.7399e-05	0.000250691	0	0.0184	0.0156	0.0156	TRUE	NA
MGG_14693	8738	8447	5958	7273	8504	8392	6539	6772	7551.7	8448	6656	0.788	-0.344	5.45031e-14	2.6144e-13	0.0002	0.001	0.0009	0.0009	TRUE	NA
MGG_14692	66	57	248	239	64	57	272	223	153.89	60	248	4.087	2.031	1.3883e-14	6.81928e-14	0	0.0254	0.0233	0.0233	TRUE	NA
MGG_14691	1	4	46	41	1	4	50	38	23.4	2	44	17.975	4.168	1.64767e-06	5.04066e-06	0	0.1642	0.1523	0.1523	TRUE	NA
MGG_14689	556	522	311	392	541	519	341	365	441.51	530	353	0.667	-0.584	5.80417e-05	0.000153211	0	0.0092	0.0078	0.0078	TRUE	NA
MGG_14683	567	579	1113	1338	552	575	1222	1246	898.59	564	1234	2.19	1.131	4.25455e-27	3.08602e-26	0	0.0048	0.004	0.004	TRUE	NA
MGG_14681	693	698	886	1191	674	693	972	1109	862.3	684	1040	1.523	0.607	5.08468e-08	1.75587e-07	0.0037	0.0049	0.0048	0.0048	TRUE	NA
MGG_14679	146	152	195	220	142	151	214	205	177.99	146	210	1.429	0.515	0.0217264	0.0397107	0	0.022	0.0184	0.0184	TRUE	NA
MGG_14677	471	465	266	363	458	462	292	338	387.57	460	315	0.685	-0.545	0.000545357	0.00128538	0	0.0104	0.0093	0.0093	TRUE	NA
MGG_14668	4	6	62	47	4	6	68	44	30.41	5	56	11.335	3.503	3.44477e-07	1.12156e-06	0	0.1265	0.1179	0.1179	TRUE	NA
MGG_14658	59	74	23	43	57	74	25	40	49.05	66	32	0.501	-0.996	0.0259519	0.0465687	0.0358	0.0786	0.0732	0.0732	TRUE	NA
MGG_14657	277	260	82	127	270	258	90	118	184.03	264	104	0.396	-1.337	1.15968e-08	4.15672e-08	0.0055	0.0213	0.0197	0.0197	TRUE	NA
MGG_14656	599	600	440	481	583	596	483	448	527.45	590	466	0.789	-0.342	0.0102137	0.0199488	0	0.0078	0.0066	0.0066	TRUE	NA
MGG_14652	145	180	398	493	141	179	437	459	303.94	160	448	2.802	1.486	1.29159e-15	6.61176e-15	0.006	0.0131	0.0124	0.0124	TRUE	NA
MGG_14649	486	422	610	682	473	419	669	635	549.18	446	652	1.461	0.547	4.42483e-05	0.00011827	0.002	0.0075	0.0067	0.0067	TRUE	NA
MGG_14647	404	409	221	261	393	406	243	243	321.27	400	243	0.607	-0.719	1.93774e-05	5.37035e-05	0	0.0124	0.0103	0.0103	TRUE	NA
MGG_14640	451	512	550	691	439	509	604	643	548.65	474	624	1.317	0.397	0.00352423	0.0074298	0.0043	0.0075	0.007	0.007	TRUE	NA
MGG_14639	97	95	301	400	94	94	330	372	222.89	94	351	3.725	1.897	8.04263e-19	4.62263e-18	0	0.0177	0.0154	0.0154	TRUE	NA
MGG_14638	441	394	258	293	429	391	283	273	344.15	410	278	0.677	-0.562	0.000625259	0.00146061	0	0.0116	0.01	0.01	TRUE	NA
MGG_14634	18	35	62	93	18	35	68	87	51.73	26	78	2.965	1.568	0.000610865	0.0014285	0.0806	0.0746	0.0752	0.0752	TRUE	NA
MGG_14632	32	32	139	152	31	32	153	142	89.25	32	148	4.671	2.224	6.73388e-11	2.76745e-10	0	0.0434	0.0367	0.0367	TRUE	NA
MGG_14629	629	526	2816	3364	612	523	3091	3132	1839.35	568	3112	5.482	2.455	1.2198e-172	3.9286e-171	0.0042	0.0026	0.0027	0.0027	TRUE	NA
MGG_14623	17	35	85	88	17	35	93	82	56.63	26	88	3.416	1.772	6.30473e-05	0.000165948	0.08	0.0681	0.0693	0.0693	TRUE	NA
MGG_14610	5823	5785	4367	5232	5667	5748	4793	4871	5269.67	5708	4832	0.847	-0.24	1.61569e-06	4.94831e-06	0	0.0012	0.001	0.001	TRUE	NA
MGG_14609	324	376	55	32	315	374	60	30	194.76	344	45	0.129	-2.953	5.7512e-26	4.05705e-25	0.097	0.0202	0.0249	0.0249	TRUE	NA
MGG_14604	15	31	40	63	15	31	44	59	36.99	23	52	2.266	1.18	0.0262366	0.0470207	0.102	0.1041	0.1039	0.1039	TRUE	NA
MGG_14603	0	8	1089	1210	0	8	1195	1127	582.43	4	1161	292.514	8.192	1.50135e-05	4.21056e-05	1.5967	0.0071	0.0066	1.5967	TRUE	NA
MGG_14602	362	363	864	871	352	361	948	811	618.04	356	880	2.465	1.302	1.27333e-22	8.16396e-22	0.0057	0.0067	0.0065	0.0065	TRUE	NA
MGG_14596	216	135	490	527	210	134	538	491	343.2	172	514	2.984	1.577	1.92882e-15	9.80563e-15	0.0432	0.0117	0.0151	0.0151	TRUE	NA
MGG_14595	409	314	741	846	398	312	813	788	577.74	355	800	2.254	1.172	1.29027e-16	6.81991e-16	0.0109	0.0071	0.0076	0.0076	TRUE	NA
MGG_14594	4	1	20	16	4	1	22	15	10.43	2	18	7.499	2.907	0.0071752	0.0144511	0	0.3677	0.3334	0.3334	TRUE	NA
MGG_14592	1602	1481	4787	5676	1559	1471	5254	5285	3392.24	1515	5270	3.477	1.798	3.76158e-184	1.2669e-182	0	0.0016	0.0014	0.0014	TRUE	NA
MGG_14587	125	137	184	248	122	136	202	231	172.65	129	216	1.681	0.75	0.00126821	0.00285044	0	0.0227	0.0198	0.0198	TRUE	NA
MGG_14575	2175	1876	7417	8683	2117	1864	8140	8084	5051.3	1990	8112	4.075	2.027	5.21882e-240	2.37252e-238	0.0034	0.0013	0.0015	0.0015	TRUE	NA
MGG_14574	2353	2337	6691	7969	2290	2322	7343	7420	4843.72	2306	7382	3.201	1.679	1.58609e-220	6.32548e-219	0	0.0013	0.0011	0.0011	TRUE	NA
MGG_14571	37	36	13	9	36	36	14	8	23.61	36	11	0.313	-1.676	0.00934356	0.0184055	0	0.1628	0.1411	0.1411	TRUE	NA
MGG_14564	0	0	9	10	0	0	10	9	4.8	0	10	53.027	5.729	0.00303667	0.00646839	0	0.7992	0.7419	0.7419	TRUE	NA
MGG_14563	1155	1019	752	918	1124	1012	825	855	954.13	1068	840	0.787	-0.346	0.000904071	0.00207334	0.0022	0.0045	0.0042	0.0042	TRUE	NA
MGG_14561	6149	6165	6654	8427	5984	6125	7303	7846	6814.56	6054	7574	1.251	0.324	2.0656e-10	8.23778e-10	0.0011	0.0011	0.0011	0.0011	TRUE	NA
MGG_14552	261	253	124	104	254	251	136	97	184.57	252	116	0.459	-1.123	2.25786e-06	6.82425e-06	0.0171	0.0213	0.0208	0.0208	TRUE	NA
MGG_14550	162	148	216	287	158	147	237	267	202.24	152	252	1.656	0.728	0.000669168	0.00155759	0	0.0194	0.0168	0.0168	TRUE	NA
MGG_14549	775	729	351	395	754	724	385	368	557.88	739	376	0.509	-0.974	9.76742e-14	4.61903e-13	0	0.0074	0.0062	0.0062	TRUE	NA
MGG_14547	403	387	185	231	392	384	203	215	298.7	388	209	0.539	-0.892	3.76126e-07	1.22086e-06	0	0.0133	0.0111	0.0111	TRUE	NA
MGG_14540	19	29	170	221	18	29	187	206	109.91	24	196	8.309	3.055	3.78736e-19	2.20321e-18	0.0007	0.0354	0.0327	0.0327	TRUE	NA
MGG_14526	4439	4246	4483	5132	4320	4218	4920	4778	4559.23	4269	4849	1.136	0.183	0.000577982	0.00135706	0	0.0013	0.0011	0.0011	TRUE	NA
MGG_14523	1115	1032	504	704	1085	1025	553	655	829.76	1055	604	0.574	-0.802	6.23865e-12	2.71974e-11	0.0061	0.0051	0.0052	0.0052	TRUE	NA
MGG_14517	4097	4108	4052	4899	3987	4081	4447	4561	4269.25	4034	4504	1.117	0.159	0.00336744	0.00711964	0	0.0014	0.0012	0.0012	TRUE	NA
MGG_14513	1908	1766	766	938	1857	1755	841	873	1331.37	1806	857	0.475	-1.075	2.0341e-33	1.68699e-32	0	0.0034	0.003	0.003	TRUE	NA
MGG_14496	408	404	225	338	397	401	247	315	340.02	399	281	0.705	-0.504	0.00385303	0.00808441	0.0104	0.0118	0.0116	0.0116	TRUE	NA
MGG_14465	33	51	152	129	32	51	167	120	92.43	42	144	3.462	1.792	3.41687e-07	1.1128e-06	0.0579	0.0419	0.0439	0.0439	TRUE	NA
MGG_14463	481	483	4395	5100	468	480	4824	4748	2629.99	474	4786	10.097	3.336	0	0	0	0.002	0.0017	0.0017	TRUE	NA
MGG_14388	17	3	45	69	17	3	49	64	33.29	10	56	5.809	2.538	7.1247e-05	0.000186332	0.4252	0.1156	0.1371	0.1371	TRUE	NA
MGG_14371	4955	4424	3148	3545	4822	4395	3455	3301	3993.3	4608	3378	0.733	-0.449	6.12346e-13	2.78149e-12	0.0022	0.0015	0.0016	0.0016	TRUE	NA
MGG_14358	73	69	373	451	71	69	409	420	242.22	70	414	5.941	2.571	4.0974e-33	3.37539e-32	0	0.0163	0.0138	0.0138	TRUE	NA
MGG_14352	1924	1733	1185	1314	1872	1722	1301	1223	1529.55	1797	1262	0.702	-0.511	2.71311e-09	1.01358e-08	0.0021	0.003	0.0029	0.0029	TRUE	NA
MGG_14350	2300	2306	1361	1535	2238	2291	1494	1429	1863.09	2264	1462	0.645	-0.633	6.04009e-17	3.24854e-16	0	0.0026	0.0022	0.0022	TRUE	NA
MGG_14348	12168	11809	4268	5197	11842	11732	4684	4839	8274.36	11787	4762	0.404	-1.307	2.22328e-186	7.55711e-185	0	0.001	0.0008	0.0008	TRUE	NA
MGG_14340	6206	6104	32948	38645	6040	6064	36161	35981	21061.5	6052	36071	5.96	2.575	0	0	0	0.0007	0.0005	0.0005	TRUE	NA
MGG_14330	183	182	112	129	178	181	123	120	150.49	180	122	0.677	-0.563	0.0205417	0.0377037	0	0.026	0.0215	0.0215	TRUE	NA
MGG_14329	3269	3132	4510	5218	3181	3112	4950	4858	4025.3	3146	4904	1.558	0.64	6.67681e-31	5.25722e-30	0	0.0014	0.0012	0.0012	TRUE	NA
MGG_14326	17	33	61	56	17	33	67	52	42.1	25	60	2.413	1.271	0.0105565	0.0205747	0.0797	0.0915	0.0902	0.0902	TRUE	NA
MGG_14324	2486	2437	954	1125	2419	2421	1047	1047	1733.77	2420	1047	0.433	-1.209	3.03622e-54	3.5381e-53	0	0.0027	0.0022	0.0022	TRUE	NA
MGG_14307	92	95	17	25	90	94	19	23	56.46	92	21	0.229	-2.127	6.33806e-07	2.01371e-06	0	0.0684	0.0583	0.0583	TRUE	NA
MGG_14303	690	615	1047	1279	672	611	1149	1191	905.61	642	1170	1.825	0.868	3.24752e-16	1.69303e-15	0.0009	0.0047	0.0042	0.0042	TRUE	NA
MGG_14302	249	214	4085	4743	242	213	4483	4416	2338.57	228	4450	19.551	4.289	0	0	0	0.0021	0.0019	0.0019	TRUE	NA
MGG_14299	76	67	168	276	74	67	184	257	145.47	70	220	3.146	1.654	1.76703e-09	6.66907e-09	0.0278	0.0268	0.027	0.027	TRUE	NA
MGG_14297	1485	1224	1706	1904	1445	1216	1872	1773	1576.6	1330	1822	1.369	0.453	1.18027e-06	3.66249e-06	0.0069	0.0029	0.0035	0.0035	TRUE	NA
MGG_14293	1001	959	643	712	974	953	706	663	823.9	964	684	0.71	-0.495	4.99668e-06	1.46066e-05	0	0.0051	0.0044	0.0044	TRUE	NA
MGG_14279	22489	21529	16073	18709	21887	21390	17640	17419	19583.9	21638	17530	0.81	-0.304	7.2261e-17	3.85823e-16	0.0001	0.0007	0.0006	0.0006	TRUE	NA
MGG_14270	12485	12115	16197	19017	12151	12037	17776	17706	14917.4	12094	17741	1.467	0.553	3.81613e-49	4.10485e-48	0	0.0008	0.0006	0.0006	TRUE	NA
MGG_14269	21935	18827	81870	86457	21347	18705	89853	80497	52600.6	20026	85175	4.253	2.089	4.48698e-64	5.90795e-63	0.0073	0.0006	0.0015	0.0073	TRUE	NA
MGG_14268	644	557	421	458	627	553	462	426	517.15	590	444	0.752	-0.411	0.00312559	0.00664646	0.0038	0.0079	0.0073	0.0073	TRUE	NA
MGG_14243	72	73	35	29	70	73	38	27	52	72	32	0.457	-1.131	0.0079276	0.015828	0	0.0742	0.0647	0.0647	TRUE	NA
MGG_14237	2689	2745	1855	2377	2617	2727	2036	2213	2398.3	2672	2124	0.796	-0.33	3.95901e-06	1.16783e-05	0.0017	0.0021	0.002	0.002	TRUE	NA
MGG_14234	437	362	190	244	425	360	209	227	305.16	392	218	0.556	-0.848	2.67224e-06	8.00876e-06	0.0065	0.0131	0.0121	0.0121	TRUE	NA
MGG_14232	3238	3162	1494	1709	3151	3142	1640	1591	2380.91	3146	1616	0.513	-0.962	2.42252e-45	2.44621e-44	0	0.0021	0.0018	0.0018	TRUE	NA
MGG_14230	923	1001	546	551	898	995	599	513	751.26	946	556	0.587	-0.769	3.33127e-10	1.31056e-09	0.0069	0.0056	0.0058	0.0058	TRUE	NA
MGG_14206	4	4	127	135	4	4	139	126	68.24	4	132	33.679	5.074	9.31575e-17	4.93815e-16	0	0.0566	0.0501	0.0501	TRUE	NA
MGG_14202	1263	1199	1617	1886	1229	1191	1775	1756	1487.76	1210	1766	1.459	0.545	3.71299e-11	1.54608e-10	0	0.0031	0.0026	0.0026	TRUE	NA
MGG_14162	1457	1431	654	751	1418	1422	718	699	1064.17	1420	708	0.499	-1.003	2.23912e-25	1.55276e-24	0	0.0041	0.0034	0.0034	TRUE	NA
MGG_14157	24012	21759	4602	5554	23369	21618	5051	5171	13802.2	22494	5111	0.227	-2.138	0	0	0.0014	0.0008	0.0009	0.0009	TRUE	NA
MGG_14154	27363	26988	26728	32144	26630	26813	29334	29928	28176.4	26722	29631	1.109	0.149	1.24861e-05	3.52323e-05	0	0.0006	0.0005	0.0005	TRUE	NA
MGG_14151	9	26	59	85	9	26	65	79	44.62	18	72	4.172	2.061	7.89948e-05	0.000205524	0.1888	0.0864	0.0954	0.0954	TRUE	NA
MGG_14150	2822	2738	5662	7000	2746	2720	6214	6517	4549.55	2733	6366	2.329	1.22	9.78265e-109	1.96847e-107	0.0005	0.0013	0.0012	0.0012	TRUE	NA
MGG_14145	0	0	14	20	0	0	15	19	8.5	0	17	94.043	6.555	0.000158205	0.000396751	0	0.4514	0.4168	0.4168	TRUE	NA
MGG_14136	16	10	27	49	16	10	30	46	25.19	13	38	2.956	1.564	0.012975	0.0248355	0	0.1526	0.1384	0.1384	TRUE	NA
MGG_14135	0	0	7	4	0	0	8	4	2.85	0	6	31.423	4.974	0.0252405	0.045479	0	1.3441	1.2845	1.2845	TRUE	NA
MGG_14133	1028	1046	690	802	1000	1039	757	747	885.92	1020	752	0.737	-0.44	2.3263e-05	6.40863e-05	0	0.0048	0.004	0.004	TRUE	NA
MGG_14129	71	61	30	32	69	61	33	30	48.11	65	32	0.483	-1.05	0.0157613	0.0296518	0	0.0801	0.0672	0.0672	TRUE	NA
MGG_14126	2	1	270	346	2	1	296	322	155.35	2	309	209.78	7.713	3.98516e-19	2.31705e-18	0	0.0252	0.0228	0.0228	TRUE	NA
MGG_14118	6955	6804	4798	5819	6769	6760	5266	5418	6053.08	6764	5342	0.79	-0.34	1.62953e-12	7.26448e-12	0	0.0011	0.0009	0.0009	TRUE	NA
MGG_14115	2529	2435	1243	1352	2461	2419	1364	1259	1875.87	2440	1312	0.537	-0.897	6.81864e-31	5.36507e-30	0.0007	0.0025	0.0023	0.0023	TRUE	NA
MGG_14099	151	118	70	86	147	117	77	80	105.27	132	78	0.594	-0.751	0.0117007	0.0226292	0	0.0369	0.0325	0.0325	TRUE	NA
MGG_14098	79	61	27	38	77	61	30	35	50.63	69	32	0.474	-1.077	0.0121907	0.0235069	0	0.0762	0.0661	0.0661	TRUE	NA
MGG_14095	200	165	294	326	195	164	323	304	246.19	180	314	1.745	0.803	4.61039e-05	0.000122962	0	0.0161	0.0143	0.0143	TRUE	NA
MGG_14085	39	40	12	14	38	40	13	13	25.98	39	13	0.337	-1.568	0.00913271	0.0180481	0	0.148	0.1226	0.1226	TRUE	NA
MGG_14071	1736	1600	2461	2986	1689	1590	2701	2780	2190.06	1640	2740	1.672	0.741	6.84536e-25	4.67372e-24	0.0005	0.0022	0.002	0.002	TRUE	NA
MGG_14070	243	228	277	340	236	227	304	317	270.9	232	310	1.341	0.423	0.0203201	0.0373439	0	0.0146	0.0122	0.0122	TRUE	NA
MGG_14068	862	914	2040	2446	839	908	2239	2277	1565.82	874	2258	2.586	1.371	1.56702e-59	1.95603e-58	0.0001	0.0029	0.0026	0.0026	TRUE	NA
MGG_14061	10771	9886	3284	3762	10482	9822	3604	3503	6852.83	10152	3554	0.35	-1.515	9.72113e-191	3.37702e-189	0.0012	0.0011	0.0011	0.0011	TRUE	NA
MGG_14057	265	343	15730	18791	258	341	17264	17496	8839.52	300	17380	58.074	5.86	3.10318e-207	1.15814e-205	0.0158	0.0009	0.0011	0.0158	TRUE	NA
MGG_14045	1056	896	1383	1572	1028	890	1518	1464	1224.85	959	1491	1.554	0.636	6.96062e-11	2.85851e-10	0.0043	0.0036	0.0037	0.0037	TRUE	NA
MGG_14042	25	43	3	2	24	43	3	2	18.05	34	2	0.076	-3.723	5.72021e-05	0.000151136	0	0.2127	0.1977	0.1977	TRUE	NA
MGG_14041	142	144	15	25	138	143	16	23	80.25	140	20	0.142	-2.812	2.69537e-13	1.24661e-12	0	0.0482	0.0424	0.0424	TRUE	NA
MGG_14014	3839	3696	3038	3620	3736	3672	3334	3370	3528.22	3704	3352	0.905	-0.144	0.0123971	0.0238757	0	0.0016	0.0013	0.0013	TRUE	NA
MGG_14011	1803	1861	3955	4804	1755	1849	4341	4473	3104.28	1802	4407	2.446	1.291	5.15494e-92	8.96798e-91	0.0004	0.0017	0.0015	0.0015	TRUE	NA
MGG_14010	1087	1068	26191	30872	1058	1061	28745	28744	14901.9	1060	28744	27.131	4.762	0	0	0	0.0008	0.0006	0.0006	TRUE	NA
MGG_14009	444	432	547	602	432	429	600	561	505.54	430	580	1.347	0.43	0.00154874	0.00344036	0	0.0081	0.0068	0.0068	TRUE	NA
MGG_14008	326	335	191	205	317	333	210	191	262.65	325	200	0.615	-0.7	0.000185618	0.000461958	0	0.0151	0.0128	0.0128	TRUE	NA
MGG_13993	1033	1046	142	169	1005	1039	156	157	589.44	1022	156	0.153	-2.706	4.37943e-81	6.9015e-80	0	0.007	0.006	0.006	TRUE	NA
MGG_13986	8022	7606	26554	31638	7807	7557	29143	29457	18491	7682	29300	3.814	1.931	0	0	0.0001	0.0007	0.0006	0.0006	TRUE	NA
MGG_13977	157	136	7	2	153	135	8	2	74.36	144	5	0.032	-4.975	1.38067e-17	7.57688e-17	0.0017	0.052	0.0496	0.0496	TRUE	NA
MGG_13971	280	259	17	62	272	257	19	58	151.55	264	38	0.145	-2.788	0.000102687	0.000263382	0.2325	0.0258	0.0397	0.2325	TRUE	NA
MGG_13963	25004	24766	19555	23355	24334	24606	21462	21745	23036.6	24470	21604	0.883	-0.18	2.61715e-07	8.59441e-07	0	0.0007	0.0005	0.0005	TRUE	NA
MGG_13947	755	767	1127	1260	735	762	1237	1173	976.71	748	1205	1.61	0.687	9.19952e-12	3.9559e-11	0	0.0044	0.0038	0.0038	TRUE	NA
MGG_13946	21	38	160	224	20	38	176	209	110.59	29	192	6.617	2.726	1.24942e-15	6.39887e-15	0.0515	0.0351	0.0362	0.0362	TRUE	NA
MGG_13944	12218	12208	23917	28123	11891	12129	26249	26184	19113.2	12010	26216	2.183	1.126	9.20632e-211	3.49492e-209	0	0.0007	0.0006	0.0006	TRUE	NA
MGG_13936	6345	6392	12484	14615	6175	6351	13701	13608	9958.6	6263	13654	2.18	1.124	1.33719e-155	3.82692e-154	0	0.0009	0.0007	0.0007	TRUE	NA
MGG_13935	977	916	1608	1894	951	910	1765	1763	1347.28	930	1764	1.896	0.923	2.39552e-26	1.71062e-25	0	0.0033	0.0028	0.0028	TRUE	NA
MGG_13928	10858	9975	4369	4935	10567	9910	4795	4595	7466.83	10238	4695	0.458	-1.125	5.29766e-110	1.07778e-108	0.0012	0.001	0.0011	0.0011	TRUE	NA
MGG_13927	11	2	33	32	11	2	36	30	19.68	6	33	5.18	2.373	0.0024621	0.00530605	0.3039	0.1952	0.2024	0.2024	TRUE	NA
MGG_13924	45	44	150	166	44	44	165	155	101.67	44	160	3.646	1.866	1.96673e-09	7.39749e-09	0	0.0382	0.0321	0.0321	TRUE	NA
MGG_13916	49	32	10	5	48	32	11	5	23.78	40	8	0.194	-2.369	0.000651153	0.00151853	0.0886	0.1616	0.1539	0.1539	TRUE	NA
MGG_13908	95	118	229	221	92	117	251	206	166.7	104	228	2.178	1.123	5.84261e-06	1.69806e-05	0.0167	0.0235	0.0226	0.0226	TRUE	NA
MGG_13895	570	570	160	213	555	566	176	198	373.74	560	187	0.334	-1.581	4.78659e-22	3.0233e-21	0	0.0107	0.0093	0.0093	TRUE	NA
MGG_13894	132	117	38	49	128	116	42	46	83.01	122	44	0.357	-1.485	1.13987e-05	3.22792e-05	0	0.0467	0.0394	0.0394	TRUE	NA
MGG_13875	942	958	289	422	917	952	317	393	644.66	934	355	0.381	-1.392	1.72399e-25	1.19779e-24	0.0078	0.0064	0.0066	0.0066	TRUE	NA
MGG_13834	1066	1072	725	776	1037	1065	796	723	905.17	1051	760	0.721	-0.471	8.29759e-06	2.3784e-05	0.0011	0.0047	0.0042	0.0042	TRUE	NA
MGG_13817	1207	1305	1504	1782	1175	1297	1651	1659	1445.25	1236	1655	1.34	0.422	1.22482e-06	3.79539e-06	0.0015	0.0031	0.0029	0.0029	TRUE	NA
MGG_13816	3514	3512	2641	3188	3420	3489	2899	2968	3193.97	3454	2934	0.849	-0.236	8.8919e-05	0.000229775	0	0.0017	0.0014	0.0014	TRUE	NA
MGG_13815	46074	46146	49411	59186	44840	45847	54229	55106	50005.4	45344	54668	1.206	0.27	1.41632e-16	7.46472e-16	0.0001	0.0006	0.0005	0.0005	TRUE	NA
MGG_13813	355	320	146	162	345	318	160	151	243.62	332	156	0.468	-1.094	2.62003e-08	9.21765e-08	0	0.0162	0.0138	0.0138	TRUE	NA
MGG_13809	239	203	398	499	233	202	437	465	333.92	218	451	2.076	1.054	6.97796e-10	2.69356e-09	0	0.012	0.0106	0.0106	TRUE	NA
MGG_13806	15098	15238	12018	14509	14694	15139	13190	13509	14132.9	14916	13350	0.895	-0.16	5.4031e-05	0.000142931	0.0002	0.0008	0.0007	0.0007	TRUE	NA
MGG_13805	158	143	279	337	154	142	306	314	228.95	148	310	2.096	1.067	1.11155e-07	3.7494e-07	0	0.0172	0.0145	0.0145	TRUE	NA
MGG_13803	1118	1149	398	556	1088	1142	437	518	796.02	1115	478	0.429	-1.221	9.64632e-25	6.55368e-24	0.0048	0.0053	0.0053	0.0053	TRUE	NA
MGG_13801	8185	7554	4813	5603	7966	7505	5282	5217	6492.47	7736	5250	0.679	-0.559	5.01762e-29	3.79655e-28	0.0008	0.0011	0.001	0.001	TRUE	NA
MGG_13800	743	661	221	248	723	657	243	231	463.32	690	237	0.343	-1.544	2.41757e-25	1.67442e-24	0	0.0088	0.0077	0.0077	TRUE	NA
MGG_13796	608	669	340	424	592	665	373	395	506.08	628	384	0.612	-0.709	3.90958e-07	1.2658e-06	0	0.0081	0.0073	0.0073	TRUE	NA
MGG_13793	560	569	676	792	545	565	742	737	647.41	555	740	1.332	0.414	0.000554181	0.00130534	0	0.0064	0.0053	0.0053	TRUE	NA
MGG_13790	1334	1236	904	1023	1298	1228	992	952	1117.72	1263	972	0.769	-0.378	6.60639e-05	0.000173351	0	0.0039	0.0034	0.0034	TRUE	NA
MGG_13787	144	136	214	247	140	135	235	230	185.03	138	232	1.688	0.756	0.000607839	0.00142172	0	0.0212	0.0176	0.0176	TRUE	NA
MGG_13783	3050	2931	1322	1513	2968	2912	1451	1409	2184.98	2940	1430	0.486	-1.041	8.53179e-49	9.11516e-48	0	0.0023	0.0019	0.0019	TRUE	NA
MGG_13782	24765	23617	16050	18603	24102	23464	17615	17321	20625.3	23783	17468	0.734	-0.445	4.3294e-34	3.6315e-33	0.0002	0.0007	0.0006	0.0006	TRUE	NA
MGG_13781	3605	3408	2102	2346	3508	3386	2307	2184	2846.4	3447	2246	0.651	-0.619	1.81393e-21	1.12893e-20	0.0006	0.0018	0.0017	0.0017	TRUE	NA
MGG_13775	1087	977	1193	1457	1058	971	1309	1357	1173.61	1014	1333	1.314	0.394	2.81961e-05	7.69281e-05	0.0011	0.0038	0.0034	0.0034	TRUE	NA
MGG_13773	6402	5746	3882	4687	6231	5709	4261	4364	5140.93	5970	4312	0.722	-0.469	1.43258e-16	7.54686e-16	0.0017	0.0012	0.0013	0.0013	TRUE	NA
MGG_13765	3676	3525	1336	1570	3578	3502	1466	1462	2501.93	3540	1464	0.414	-1.274	5.12286e-80	8.01589e-79	0	0.002	0.0017	0.0017	TRUE	NA
MGG_13764	13	12	113	119	13	12	124	111	64.85	12	118	9.547	3.255	3.06346e-13	1.41244e-12	0	0.0596	0.0514	0.0514	TRUE	NA
MGG_13762	532	522	625	684	518	519	686	637	589.79	518	662	1.276	0.351	0.00549767	0.0112719	0	0.007	0.006	0.006	TRUE	NA
MGG_13743	141	140	236	266	137	139	259	248	195.75	138	254	1.833	0.874	4.85212e-05	0.000129067	0	0.0201	0.0167	0.0167	TRUE	NA
MGG_13732	274	289	160	175	267	287	176	163	223.08	277	170	0.611	-0.711	0.000453542	0.001078	0	0.0177	0.015	0.015	TRUE	NA
MGG_13719	2	6	40	52	2	6	44	48	25.06	4	46	11.72	3.551	2.75812e-06	8.25942e-06	0	0.1534	0.1399	0.1399	TRUE	NA
MGG_13711	0	0	7	6	0	0	8	6	3.32	0	7	36.621	5.195	0.0143006	0.0271069	0	1.1555	1.084	1.084	TRUE	NA
MGG_13697	333	278	139	145	324	276	153	135	221.96	300	144	0.478	-1.064	4.34241e-07	1.40101e-06	0	0.0178	0.0161	0.0161	TRUE	NA
MGG_13677	5147	5162	3314	3769	5009	5129	3637	3509	4321	5069	3573	0.705	-0.505	2.71052e-20	1.63445e-19	0	0.0014	0.0012	0.0012	TRUE	NA
MGG_13669	1033	1031	5220	6137	1005	1024	5729	5714	3368.14	1014	5722	5.638	2.495	0	0	0	0.0016	0.0014	0.0014	TRUE	NA
MGG_13662	362	339	210	275	352	337	230	256	293.91	344	243	0.707	-0.501	0.00475846	0.00983659	0	0.0135	0.0116	0.0116	TRUE	NA
MGG_13656	156	141	62	69	152	140	68	64	106.05	146	66	0.453	-1.143	0.000105145	0.000269185	0	0.0366	0.0307	0.0307	TRUE	NA
MGG_13655	1014	879	690	776	987	873	757	723	834.98	930	740	0.795	-0.331	0.00316651	0.00672184	0.0033	0.0051	0.0048	0.0048	TRUE	NA
MGG_13654	19209	18668	37766	43347	18694	18547	41448	40359	29762.2	18620	40904	2.197	1.135	8.84328e-236	3.86133e-234	0.0001	0.0006	0.0005	0.0005	TRUE	NA
MGG_13651	4055	3896	1343	1639	3946	3871	1474	1526	2704.28	3908	1500	0.384	-1.381	2.16611e-97	3.94218e-96	0	0.0019	0.0016	0.0016	TRUE	NA
MGG_13647	699	619	222	304	680	615	244	283	455.49	648	264	0.407	-1.296	1.41744e-17	7.77479e-17	0.0049	0.0089	0.0084	0.0084	TRUE	NA
MGG_13646	3790	3803	3714	4400	3688	3778	4076	4097	3909.91	3733	4086	1.095	0.13	0.0188516	0.0348892	0	0.0015	0.0012	0.0012	TRUE	NA
MGG_13645	16881	15915	8091	9613	16429	15812	8880	8950	12517.7	16120	8915	0.553	-0.855	1.07831e-96	1.95281e-95	0.0003	0.0008	0.0007	0.0007	TRUE	NA
MGG_13641	991	971	1156	1403	964	965	1269	1306	1126.04	964	1288	1.335	0.417	7.13201e-06	2.05443e-05	0	0.0039	0.0032	0.0032	TRUE	NA
MGG_13635	403	377	200	222	392	375	220	207	298.24	384	214	0.555	-0.848	1.44004e-06	4.43617e-06	0	0.0133	0.0112	0.0112	TRUE	NA
MGG_13629	333	303	69	111	324	301	76	103	201.05	312	90	0.288	-1.797	9.27831e-15	4.59218e-14	0.0095	0.0196	0.0186	0.0186	TRUE	NA
MGG_13624	754	709	1024	1226	734	704	1124	1141	925.89	719	1132	1.575	0.656	1.3912e-10	5.60692e-10	0	0.0046	0.0039	0.0039	TRUE	NA
MGG_13622	1676	1652	522	620	1631	1641	573	577	1105.64	1636	575	0.352	-1.508	3.92194e-55	4.63377e-54	0	0.004	0.0033	0.0033	TRUE	NA
MGG_13619	2359	2342	1765	2191	2296	2327	1937	2040	2149.92	2312	1988	0.861	-0.216	0.00239267	0.00516549	0	0.0023	0.002	0.002	TRUE	NA
MGG_13617	310	317	982	1185	302	315	1078	1103	699.43	308	1090	3.538	1.823	8.60311e-51	9.47543e-50	0	0.006	0.005	0.005	TRUE	NA
MGG_13610	104	114	275	341	101	113	302	317	208.45	107	310	2.889	1.531	1.26883e-12	5.69323e-12	0	0.0189	0.0161	0.0161	TRUE	NA
MGG_13591	202	184	132	119	197	183	145	111	158.77	190	128	0.672	-0.574	0.0202832	0.0372826	0.0102	0.0246	0.0228	0.0228	TRUE	NA
MGG_13584	2	6	140	150	2	6	154	140	75.3	4	147	37.238	5.219	5.8876e-18	3.28653e-17	0.0003	0.0514	0.0471	0.0471	TRUE	NA
MGG_13578	48	47	9	16	47	47	10	15	29.55	47	12	0.267	-1.905	0.00106633	0.00242381	0	0.1302	0.1117	0.1117	TRUE	NA
MGG_13563	15659	15419	8678	10400	15240	15319	9524	9683	12441.5	15280	9604	0.629	-0.67	5.272e-65	7.0253e-64	0	0.0008	0.0007	0.0007	TRUE	NA
MGG_13562	494	457	600	698	481	454	659	650	560.8	468	654	1.399	0.485	0.000169754	0.000424751	0	0.0073	0.0062	0.0062	TRUE	NA
MGG_13557	358	277	2735	3366	348	275	3002	3134	1689.81	312	3068	9.834	3.298	1.11932e-234	4.81135e-233	0.0107	0.0028	0.0031	0.0031	TRUE	NA
MGG_13552	1443	1465	2085	2747	1404	1456	2288	2558	1926.45	1430	2423	1.696	0.762	3.64183e-21	2.24255e-20	0.0031	0.0025	0.0026	0.0026	TRUE	NA
MGG_13538	10	13	60	64	10	13	66	60	37.02	12	63	5.539	2.47	4.96991e-06	1.4536e-05	0	0.104	0.089	0.089	TRUE	NA
MGG_13535	1339	1399	742	885	1303	1390	814	824	1082.85	1346	819	0.608	-0.717	1.13924e-13	5.37827e-13	0	0.004	0.0035	0.0035	TRUE	NA
MGG_13530	3477	3441	5839	7051	3384	3419	6408	6565	4943.96	3402	6486	1.907	0.932	2.10304e-72	3.0211e-71	0	0.0013	0.0011	0.0011	TRUE	NA
MGG_13526	5253	5370	6158	6828	5112	5335	6758	6357	5890.81	5224	6558	1.255	0.328	4.81237e-10	1.87125e-09	0.001	0.0011	0.0012	0.0012	TRUE	NA
MGG_13518	2608	2314	1311	1315	2538	2299	1439	1224	1875.08	2418	1332	0.55	-0.863	7.72186e-22	4.84403e-21	0.0078	0.0025	0.0033	0.0033	TRUE	NA
MGG_13517	28	32	46	93	27	32	50	87	49.03	30	68	2.33	1.22	0.0077107	0.015434	0.0664	0.0786	0.0768	0.0768	TRUE	NA
MGG_13514	575	666	687	894	560	662	754	832	701.91	611	793	1.3	0.379	0.00270883	0.00580832	0.0078	0.006	0.0062	0.0062	TRUE	NA
MGG_13512	396	356	729	748	385	354	800	696	558.9	370	748	2.023	1.016	1.35361e-13	6.34307e-13	0.0053	0.0074	0.0071	0.0071	TRUE	NA
MGG_13508	1611	1537	1629	2051	1568	1527	1788	1910	1698.08	1548	1849	1.195	0.257	0.0012216	0.00275409	0.0007	0.0028	0.0025	0.0025	TRUE	NA
MGG_13500	1186	1172	636	783	1154	1164	698	729	936.42	1159	714	0.616	-0.7	6.33231e-12	2.75514e-11	0	0.0046	0.0038	0.0038	TRUE	NA
MGG_13499	6280	5766	1715	1979	6112	5729	1882	1843	3891.31	5920	1862	0.314	-1.669	3.37371e-166	1.04689e-164	0.0011	0.0015	0.0014	0.0014	TRUE	NA
MGG_13498	714	666	396	467	695	662	435	435	556.49	678	435	0.641	-0.642	7.39371e-07	2.333e-06	0	0.0074	0.0062	0.0062	TRUE	NA
MGG_13497	767	757	551	669	746	752	605	623	681.54	749	614	0.819	-0.287	0.0139097	0.0264202	0	0.0061	0.0051	0.0051	TRUE	NA
MGG_13493	866	787	576	742	843	782	632	691	736.93	812	662	0.815	-0.295	0.0113903	0.0220791	0.002	0.0057	0.0052	0.0052	TRUE	NA
MGG_13485	5634	5857	2904	3475	5483	5819	3187	3235	4431.19	5651	3211	0.568	-0.815	1.0131e-47	1.05682e-46	0.0008	0.0014	0.0013	0.0013	TRUE	NA
MGG_13484	273	328	318	463	266	326	349	431	342.91	296	390	1.321	0.402	0.0257016	0.0461893	0.0185	0.0117	0.0126	0.0126	TRUE	NA
MGG_13481	1489	1436	2338	2646	1449	1427	2566	2464	1976.34	1438	2515	1.748	0.806	9.65596e-28	7.10182e-27	0	0.0024	0.0021	0.0021	TRUE	NA
MGG_13471	11146	9836	13662	15550	10847	9772	14994	14478	12523	10310	14736	1.429	0.515	9.95135e-25	6.75676e-24	0.0029	0.0008	0.0011	0.0011	TRUE	NA
MGG_13464	105	78	16810	19215	102	77	18449	17890	9129.79	90	18170	201.963	7.658	0	0	0.0005	0.0009	0.0009	0.0009	TRUE	NA
MGG_13463	39	27	8080	8912	38	27	8868	8298	4307.57	32	8583	264.478	8.047	0	0	0	0.0014	0.0015	0.0015	TRUE	NA
MGG_13455	3469	3578	1535	2032	3376	3555	1685	1892	2626.87	3466	1788	0.517	-0.953	1.00511e-38	9.12363e-38	0.0032	0.002	0.0022	0.0022	TRUE	NA
MGG_13453	425	437	310	325	414	434	340	303	372.65	424	322	0.757	-0.401	0.0117639	0.0227434	0	0.0108	0.0094	0.0094	TRUE	NA
MGG_13448	255	287	158	218	248	285	173	203	227.42	266	188	0.707	-0.5	0.0151047	0.0285234	0.0063	0.0173	0.0158	0.0158	TRUE	NA
MGG_13447	1415	1294	834	820	1377	1286	915	763	1085.38	1332	839	0.629	-0.668	4.81926e-10	1.87327e-09	0.0074	0.004	0.0046	0.0046	TRUE	NA
MGG_13441	167	135	209	230	163	134	229	214	185.04	148	222	1.494	0.579	0.0102703	0.0200487	0	0.0212	0.0189	0.0189	TRUE	NA
MGG_13439	2286	1926	1581	1853	2225	1914	1735	1725	1899.68	2070	1730	0.836	-0.258	0.00228665	0.00495015	0.0046	0.0025	0.0029	0.0029	TRUE	NA
MGG_13438	9498	8981	4886	5791	9244	8923	5362	5392	7230.15	9084	5377	0.592	-0.756	1.47122e-59	1.83853e-58	0.0002	0.001	0.0009	0.0009	TRUE	NA
MGG_13430	19	19	124	161	18	19	136	150	80.84	18	143	7.658	2.937	2.11081e-14	1.02995e-13	0	0.0479	0.0411	0.0411	TRUE	NA
MGG_13429	641	676	307	353	624	672	337	329	490.26	648	333	0.514	-0.961	6.2768e-12	2.7353e-11	0	0.0083	0.0071	0.0071	TRUE	NA
MGG_13427	1	1	53	48	1	1	58	45	26.21	1	52	52.231	5.707	7.93193e-07	2.49926e-06	0	0.1467	0.1321	0.1321	TRUE	NA
MGG_13426	0	0	86	117	0	0	94	109	50.83	0	102	562.463	9.136	1.0008e-09	3.83086e-09	0	0.0759	0.0694	0.0694	TRUE	NA
MGG_13413	669	635	368	413	651	631	404	385	517.59	641	394	0.615	-0.702	1.77531e-07	5.89477e-07	0	0.0079	0.0066	0.0066	TRUE	NA
MGG_13410	1425	1317	980	1243	1387	1308	1076	1157	1232.04	1348	1116	0.829	-0.271	0.00338475	0.00715349	0.0013	0.0036	0.0033	0.0033	TRUE	NA
MGG_13404	452	471	145	159	440	468	159	148	303.75	454	154	0.338	-1.565	3.62776e-18	2.0426e-17	0	0.0131	0.0112	0.0112	TRUE	NA
MGG_13398	682	597	319	368	664	593	350	343	487.4	628	346	0.551	-0.86	1.34183e-09	5.10439e-09	0	0.0084	0.0074	0.0074	TRUE	NA
MGG_13376	3	2	98	123	3	2	108	115	56.75	2	112	45.198	5.498	1.30174e-13	6.11149e-13	0	0.068	0.0602	0.0602	TRUE	NA
MGG_13349	112	124	376	395	109	123	413	368	253.16	116	390	3.359	1.748	3.74932e-18	2.10782e-17	0	0.0156	0.0139	0.0139	TRUE	NA
MGG_13347	549	489	2257	2847	534	486	2477	2651	1536.98	510	2564	5.027	2.33	2.22398e-142	5.72689e-141	0.0021	0.003	0.0029	0.0029	TRUE	NA
MGG_13346	15	18	115	134	15	18	126	125	70.86	16	126	7.731	2.951	6.95928e-13	3.15079e-12	0	0.0546	0.0468	0.0468	TRUE	NA
MGG_13326	928	840	6947	8229	903	835	7624	7662	4255.95	869	7643	8.795	3.137	0	0	0	0.0014	0.0013	0.0013	TRUE	NA
MGG_13325	8	1	31	45	8	1	34	42	21.17	4	38	8.619	3.108	0.000113677	0.000289619	0.3389	0.1814	0.1867	0.1867	TRUE	NA
MGG_13324	791	718	1355	1608	770	713	1487	1497	1116.86	742	1492	2.012	1.009	7.39313e-26	5.18881e-25	0	0.0039	0.0034	0.0034	TRUE	NA
MGG_13309	16	10	717	810	16	10	787	754	391.64	13	770	60.283	5.914	2.04385e-77	3.09717e-76	0	0.0103	0.0093	0.0093	TRUE	NA
MGG_13308	126	126	31	43	123	125	34	40	80.47	124	37	0.3	-1.739	6.00895e-07	1.9141e-06	0	0.0481	0.0407	0.0407	TRUE	NA
MGG_13292	1665	1623	2647	3015	1620	1612	2905	2807	2236.29	1616	2856	1.767	0.821	6.90007e-32	5.55982e-31	0	0.0022	0.0019	0.0019	TRUE	NA
MGG_13291	745	726	371	355	725	721	407	331	546.01	723	369	0.509	-0.975	4.73178e-12	2.07264e-11	0.0067	0.0075	0.0075	0.0075	TRUE	NA
MGG_13290	324	203	408	485	315	202	448	452	354.09	258	450	1.739	0.798	4.47512e-05	0.000119499	0.0422	0.0113	0.0153	0.0153	TRUE	NA
MGG_13279	1051	1085	5384	6440	1023	1078	5909	5996	3501.46	1050	5952	5.668	2.503	0	0	0	0.0016	0.0014	0.0014	TRUE	NA
MGG_13276	163	172	522	588	159	171	573	547	362.47	165	560	3.399	1.765	3.06994e-26	2.18375e-25	0	0.0111	0.0094	0.0094	TRUE	NA
MGG_13275	159	166	6	2	155	165	7	2	82.03	160	4	0.025	-5.299	6.33746e-19	3.65778e-18	0	0.0472	0.0436	0.0436	TRUE	NA
MGG_13269	563	446	93	135	548	443	102	126	304.7	496	114	0.231	-2.117	2.32669e-26	1.66255e-25	0.0176	0.0131	0.0137	0.0137	TRUE	NA
MGG_13262	2405	2263	1127	1299	2341	2248	1237	1209	1758.81	2294	1223	0.533	-0.908	1.98612e-31	1.58074e-30	0	0.0027	0.0023	0.0023	TRUE	NA
MGG_13261	538	546	134	164	524	542	147	153	341.45	533	150	0.281	-1.829	1.67924e-26	1.2038e-25	0	0.0117	0.0099	0.0099	TRUE	NA
MGG_13253	951	901	2354	2777	926	895	2584	2586	1747.45	910	2585	2.839	1.505	3.40057e-81	5.36658e-80	0	0.0027	0.0023	0.0023	TRUE	NA
MGG_13252	60	30	109	127	58	30	120	118	81.52	44	119	2.694	1.43	0.000114174	0.000290755	0.0769	0.0475	0.0506	0.0506	TRUE	NA
MGG_13246	1625	1544	3159	3861	1581	1534	3467	3595	2544.33	1558	3531	2.267	1.181	1.68006e-68	2.32285e-67	0	0.002	0.0017	0.0017	TRUE	NA
MGG_13241	35	23	66	73	34	23	72	68	49.33	28	70	2.464	1.301	0.00318056	0.00674907	0	0.0782	0.069	0.069	TRUE	NA
MGG_13240	65	66	5673	6407	63	66	6226	5965	3080.08	64	6096	94.632	6.564	0	0	0	0.0017	0.0016	0.0016	TRUE	NA
MGG_13239	36757	35696	93634	108575	35772	35465	102764	101090	68772.8	35618	101927	2.862	1.517	0	0	0	0.0006	0.0005	0.0005	TRUE	NA
MGG_13236	1808	1793	1286	1370	1760	1781	1411	1276	1556.98	1770	1344	0.758	-0.399	2.3933e-06	7.21778e-06	0.0017	0.003	0.0028	0.0028	TRUE	NA
MGG_13230	761	735	384	450	741	730	421	419	577.82	736	420	0.571	-0.808	2.15276e-10	8.57303e-10	0	0.0071	0.0059	0.0059	TRUE	NA
MGG_13224	403	388	1054	1223	392	385	1157	1139	768.29	388	1148	2.951	1.561	1.83793e-42	1.76707e-41	0	0.0055	0.0046	0.0046	TRUE	NA
MGG_13222	1588	1436	1815	2241	1545	1427	1992	2087	1762.66	1486	2040	1.373	0.457	1.15115e-08	4.12747e-08	0.0015	0.0027	0.0025	0.0025	TRUE	NA
MGG_13220	654	772	1332	1600	636	767	1462	1490	1088.77	702	1476	2.104	1.073	5.29172e-24	3.52792e-23	0.0066	0.004	0.0044	0.0044	TRUE	NA
MGG_13219	5860	6254	2059	2547	5703	6213	2260	2371	4136.93	5958	2316	0.389	-1.363	1.19229e-106	2.33119e-105	0.0023	0.0014	0.0016	0.0016	TRUE	NA
MGG_13218	303	291	350	459	295	289	384	427	348.87	292	406	1.391	0.476	0.00361437	0.00760243	0	0.0115	0.0099	0.0099	TRUE	NA
MGG_13217	476	445	279	301	463	442	306	280	372.96	452	293	0.647	-0.628	7.27804e-05	0.000190178	0	0.0108	0.0092	0.0092	TRUE	NA
MGG_13208	457	494	1702	1854	445	491	1868	1726	1132.43	468	1797	3.841	1.941	5.66215e-80	8.83471e-79	0.0026	0.0039	0.0037	0.0037	TRUE	NA
MGG_13203	205	201	77	107	200	200	85	100	145.83	200	92	0.462	-1.113	1.12507e-05	3.18927e-05	0	0.0268	0.0229	0.0229	TRUE	NA
MGG_13200	2918	2972	1547	1783	2840	2953	1698	1660	2287.63	2896	1679	0.58	-0.787	1.43371e-29	1.09835e-28	0	0.0022	0.0019	0.0019	TRUE	NA
MGG_13198	6	5	49	44	6	5	54	41	26.39	6	48	8.749	3.129	5.73324e-06	1.66759e-05	0	0.1457	0.127	0.127	TRUE	NA
MGG_13192	15882	15614	5930	6691	15457	15513	6508	6230	10926.9	15485	6369	0.411	-1.282	2.07498e-199	7.46656e-198	0.0003	0.0008	0.0008	0.0008	TRUE	NA
MGG_13191	680	726	503	586	662	721	552	546	620.18	692	549	0.794	-0.334	0.00728095	0.0146427	0	0.0067	0.0058	0.0058	TRUE	NA
MGG_13188	2560	2314	1775	2136	2491	2299	1948	1989	2181.82	2395	1968	0.822	-0.283	0.000111587	0.000284688	0.0013	0.0023	0.0021	0.0021	TRUE	NA
MGG_13186	1522	1541	3056	3590	1481	1531	3354	3343	2427.19	1506	3348	2.223	1.153	1.47236e-64	1.9573e-63	0	0.0021	0.0017	0.0017	TRUE	NA
MGG_13185	3567	3534	4170	4922	3471	3511	4577	4583	4035.46	3491	4580	1.312	0.392	7.61217e-13	3.44215e-12	0	0.0014	0.0012	0.0012	TRUE	NA
MGG_13177	3282	3321	6435	7817	3194	3299	7062	7278	5208.54	3246	7170	2.209	1.143	9.37457e-107	1.83945e-105	0.0003	0.0012	0.0011	0.0011	TRUE	NA
MGG_13176	1481	1475	826	1162	1441	1465	907	1082	1223.8	1453	994	0.685	-0.546	6.01712e-08	2.06689e-07	0.0062	0.0036	0.004	0.004	TRUE	NA
MGG_13171	2193	2200	1533	1810	2134	2186	1682	1685	1921.93	2160	1684	0.78	-0.359	1.0077e-06	3.14911e-06	0	0.0025	0.0021	0.0021	TRUE	NA
MGG_13168	5568	5283	3445	4047	5419	5249	3781	3768	4554.14	5334	3774	0.708	-0.499	6.49246e-21	3.98014e-20	0	0.0013	0.0011	0.0011	TRUE	NA
MGG_13154	955	853	1897	2110	929	847	2082	1965	1455.85	888	2024	2.276	1.187	7.32758e-41	6.87163e-40	0.0019	0.0031	0.003	0.003	TRUE	NA
MGG_13149	2187	2051	1649	1976	2128	2038	1810	1840	1953.93	2083	1825	0.876	-0.191	0.00964147	0.0189329	0	0.0025	0.0021	0.0021	TRUE	NA
MGG_13132	72	59	95	138	70	59	104	128	90.36	64	116	1.811	0.857	0.00795125	0.0158723	0	0.0429	0.0381	0.0381	TRUE	NA
MGG_13126	345	357	218	231	336	355	239	215	286.19	346	227	0.657	-0.605	0.000778576	0.0017971	0	0.0139	0.0119	0.0119	TRUE	NA
MGG_13121	1286	1266	873	1105	1252	1258	958	1029	1124.07	1255	994	0.792	-0.336	0.00037983	0.000912764	0	0.0039	0.0034	0.0034	TRUE	NA
MGG_13119	474	520	594	617	461	517	652	574	551.08	489	613	1.253	0.325	0.0174051	0.0324458	0.0054	0.0074	0.0072	0.0072	TRUE	NA
MGG_13116	86	72	213	228	84	72	234	212	150.32	78	223	2.871	1.521	2.37091e-09	8.87845e-09	0	0.026	0.0226	0.0226	TRUE	NA
MGG_13110	727	739	490	516	708	734	538	480	614.99	721	509	0.705	-0.503	6.93101e-05	0.000181524	0.0014	0.0067	0.006	0.006	TRUE	NA
MGG_13107	3221	3124	2182	2456	3135	3104	2395	2287	2729.98	3120	2341	0.75	-0.415	1.41606e-10	5.70503e-10	0	0.0019	0.0016	0.0016	TRUE	NA
MGG_13106	563	563	346	355	548	559	380	331	454.38	554	356	0.641	-0.643	1.14425e-05	3.23868e-05	0.0014	0.0089	0.008	0.008	TRUE	NA
MGG_13079	159	196	75	113	155	195	82	105	134.25	175	94	0.538	-0.894	0.0010933	0.00248256	0.0199	0.029	0.0278	0.0278	TRUE	NA
MGG_13068	1441	1502	1604	1818	1402	1492	1760	1693	1586.94	1447	1726	1.193	0.254	0.00190735	0.00417597	0.0007	0.0029	0.0026	0.0026	TRUE	NA
MGG_13065	2116	2148	2457	2922	2059	2134	2697	2721	2402.64	2096	2709	1.292	0.37	4.18704e-08	1.4518e-07	0	0.0021	0.0018	0.0018	TRUE	NA
MGG_13063	3271	3224	3658	4536	3183	3203	4015	4223	3656.12	3193	4119	1.29	0.368	3.22056e-10	1.26836e-09	0.0004	0.0015	0.0014	0.0014	TRUE	NA
MGG_13058	683	692	285	389	665	688	313	362	506.8	676	338	0.5	-1	1.3376e-12	5.99693e-12	0.0018	0.0081	0.0073	0.0073	TRUE	NA
MGG_13049	3558	3309	1232	1353	3463	3288	1352	1260	2340.53	3376	1306	0.387	-1.371	6.39313e-79	9.87762e-78	0.0013	0.0021	0.002	0.002	TRUE	NA
MGG_13035	3236	2792	2127	2407	3149	2774	2334	2241	2624.67	2962	2288	0.772	-0.373	5.6225e-07	1.7941e-06	0.0037	0.002	0.0023	0.0023	TRUE	NA
MGG_13033	625	613	1246	1611	608	609	1367	1500	1021.18	608	1434	2.357	1.237	1.08293e-33	9.03561e-33	0	0.0042	0.0039	0.0039	TRUE	NA
MGG_13028	1063	1096	862	883	1035	1089	946	822	972.9	1062	884	0.832	-0.266	0.0126944	0.024376	0.0044	0.0044	0.0044	0.0044	TRUE	NA
MGG_13026	1323	1244	6849	7807	1288	1236	7517	7269	4327.28	1262	7393	5.858	2.55	0	0	0	0.0014	0.0012	0.0012	TRUE	NA
MGG_13025	1053	986	1213	1391	1025	980	1331	1295	1157.7	1002	1313	1.31	0.39	2.51734e-05	6.90738e-05	0	0.0038	0.0032	0.0032	TRUE	NA
MGG_13024	276	290	424	468	269	288	465	436	364.45	278	450	1.618	0.694	1.44685e-05	4.06496e-05	0	0.011	0.0094	0.0094	TRUE	NA
MGG_13023	528	568	647	699	514	564	710	651	609.77	539	680	1.261	0.335	0.00863906	0.0171431	0.0024	0.0068	0.0062	0.0062	TRUE	NA
MGG_13021	512	542	275	372	498	538	302	346	421.24	518	324	0.626	-0.675	1.01584e-05	2.88779e-05	0.0031	0.0096	0.0087	0.0087	TRUE	NA
MGG_13020	1489	1550	1817	2077	1449	1540	1994	1934	1729.27	1494	1964	1.314	0.394	5.72899e-07	1.82702e-06	0	0.0027	0.0024	0.0024	TRUE	NA
MGG_13019	14	17	53	57	14	17	58	53	35.44	16	56	3.645	1.866	0.000391893	0.000939302	0	0.1086	0.0917	0.0917	TRUE	NA
MGG_13014	31825	31805	41342	49231	30973	31599	45373	45837	38445.4	31286	45605	1.458	0.544	7.44436e-61	9.45263e-60	0.0001	0.0006	0.0005	0.0005	TRUE	NA
MGG_13013	20322	20035	20170	23284	19778	19905	22137	21679	20874.6	19842	21908	1.104	0.143	6.35816e-05	0.000167275	0.0001	0.0007	0.0006	0.0006	TRUE	NA
MGG_13012	17	17	55	49	17	17	60	46	34.85	17	53	3.164	1.662	0.00164167	0.00363438	0	0.1104	0.0949	0.0949	TRUE	NA
MGG_13009	7963	7339	3680	4127	7750	7291	4039	3843	5730.62	7520	3941	0.524	-0.933	3.42986e-67	4.69512e-66	0.0012	0.0012	0.0012	0.0012	TRUE	NA
MGG_13007	24	27	129	176	23	27	142	164	88.91	25	153	6.094	2.607	2.43894e-13	1.13016e-12	0	0.0436	0.038	0.038	TRUE	NA
MGG_12996	1459	1405	762	854	1420	1396	836	795	1111.81	1408	816	0.579	-0.788	8.71688e-17	4.63404e-16	0	0.0039	0.0033	0.0033	TRUE	NA
MGG_12988	735	805	527	698	715	800	578	650	685.84	758	614	0.812	-0.301	0.0152921	0.0288329	0.005	0.0061	0.0059	0.0059	TRUE	NA
MGG_12986	2907	2983	5291	6338	2829	2964	5807	5901	4375.2	2896	5854	2.021	1.015	1.31156e-75	1.95795e-74	0.0002	0.0014	0.0012	0.0012	TRUE	NA
MGG_12983	6	8	269	268	6	8	295	250	139.64	7	272	39.53	5.305	1.79228e-31	1.42852e-30	0	0.0279	0.026	0.026	TRUE	NA
MGG_12982	6	3	183	245	6	3	201	228	109.44	4	214	48.526	5.601	2.98003e-24	2.00003e-23	0	0.0355	0.0325	0.0325	TRUE	NA
MGG_12981	0	0	40	48	0	0	44	45	22.15	0	44	244.921	7.936	3.61492e-07	1.17488e-06	0	0.1735	0.1574	0.1574	TRUE	NA
MGG_12974	104	149	59	87	101	148	65	81	98.75	124	73	0.586	-0.77	0.0172629	0.0322189	0.04	0.0393	0.0394	0.0394	TRUE	NA
MGG_12973	1880	1813	1248	1437	1830	1801	1370	1338	1584.63	1816	1354	0.746	-0.424	1.14108e-07	3.84549e-07	0	0.0029	0.0024	0.0024	TRUE	NA
MGG_12972	695	715	417	516	676	710	458	480	581.21	693	469	0.677	-0.563	9.98182e-06	2.83979e-05	0	0.0071	0.006	0.006	TRUE	NA
[truncated: 5,183 more rows]

## Sheet: Hisat2_DEseq_up
Supplementary Table 3: Obtained differentioal expressed genes using Hisat2+DEseq2 and Star+DEseq2 method
[truncated: 1,439 more rows]

[truncated: 5 more sheets: Hisat2_DEseq_down, STAR_DESeq, STAR_DEseq_sig, STAR_DEseq_up, STAR_DEseq_down]
