# Supplementary material for: RNA-Seq Analysis of Magnaporthe grisea Transcriptome Reveals the High Potential of ZnO Nanoparticles as a Nanofungicide
Source: Front Plant Sci. 2022 Jun 10;13:896283. doi: 10.3389/fpls.2022.896283 (PMC9230574; doi:10.3389/fpls.2022.896283)
Supplement: Supplementary file 4 [file Table_4.xlsx]

## Sheet: Up-regulated_GO_KEGG
Supplementary Table 4: The output of GO and KEGG analysis
source	term_name	term_id	adjusted_p_value	negative_log10_of_adjusted_p_value	term_size	query_size	intersection_size	effective_domain_size	intersections
GO:MF	calcium transmembrane transporter activity, phosphorylative mechanism	GO:0005388	0.018325746779844974	1.7369383186918734	6	1033	5	9048	MGG_05078,MGG_04890,MGG_13279,MGG_07971,MGG_02487
GO:MF	calcium ion transmembrane transporter activity	GO:0015085	0.040026201212691986	1.3976556257493082	13	1033	7	9048	MGG_05078,MGG_04890,MGG_13279,MGG_07971,MGG_13224,MGG_11454,MGG_02487
GO:MF	ion transmembrane transporter activity, phosphorylative mechanism	GO:0015662	0.04117514054896518	1.3853649097165364	25	1033	10	9048	MGG_05078,MGG_04852,MGG_04890,MGG_10730,MGG_02074,MGG_13279,MGG_07971,MGG_00111,MGG_03724,MGG_02487
GO:BP	calcium ion transport	GO:0006816	0.023009837062136017	1.638086456657987	11	967	7	8731	MGG_04890,MGG_13279,MGG_07971,MGG_13224,MGG_11454,MGG_00140,MGG_02487
GO:CC	integral component of membrane	GO:0016021	3.430817829556437e-15	14.464602341611219	2130	1046	365	8852	MGG_04632,MGG_02143,MGG_03807,MGG_13426,MGG_08947,MGG_02283,MGG_14603,MGG_10869,MGG_05819,MGG_05106,MGG_10402,MGG_15887,MGG_00112,MGG_03363,MGG_02383,MGG_15617,MGG_10474,MGG_02331,MGG_08003,MGG_06452,MGG_02335,MGG_02717,MGG_03395,MGG_09941,MGG_07833,MGG_01018,MGG_06156,MGG_05411,MGG_00826,MGG_08494,MGG_05553,MGG_05105,MGG_07832,MGG_08774,MGG_13584,MGG_17422,MGG_10893,MGG_10487,MGG_01388,MGG_07966…
GO:CC	intrinsic component of membrane	GO:0031224	3.884860248058709e-15	14.410624599665796	2139	1046	366	8852	MGG_04632,MGG_02143,MGG_03807,MGG_13426,MGG_08947,MGG_02283,MGG_14603,MGG_10869,MGG_05819,MGG_05106,MGG_10402,MGG_15887,MGG_00112,MGG_03363,MGG_02383,MGG_15617,MGG_10474,MGG_02331,MGG_08003,MGG_06452,MGG_02335,MGG_02717,MGG_03395,MGG_09941,MGG_07833,MGG_01018,MGG_06156,MGG_05411,MGG_00826,MGG_08494,MGG_05553,MGG_05105,MGG_07832,MGG_08774,MGG_13584,MGG_17422,MGG_10893,MGG_10487,MGG_01388,MGG_07966…
GO:CC	membrane part	GO:0044425	5.75280543803525e-10	9.240120313722898	2310	1046	367	8852	MGG_04632,MGG_02143,MGG_03807,MGG_13426,MGG_08947,MGG_02283,MGG_14603,MGG_10869,MGG_05819,MGG_05106,MGG_10402,MGG_15887,MGG_00112,MGG_03363,MGG_02383,MGG_15617,MGG_10474,MGG_02331,MGG_08003,MGG_06452,MGG_02335,MGG_02717,MGG_03395,MGG_09941,MGG_07833,MGG_01018,MGG_06156,MGG_05411,MGG_00826,MGG_08494,MGG_05553,MGG_05105,MGG_07832,MGG_08774,MGG_13584,MGG_17422,MGG_10893,MGG_10487,MGG_01388,MGG_07966…
GO:CC	membrane	GO:0016020	4.6084768455659876e-8	7.336442590200374	2515	1046	384	8852	MGG_04632,MGG_02143,MGG_03807,MGG_13426,MGG_08947,MGG_02283,MGG_14603,MGG_02210,MGG_10869,MGG_05819,MGG_05106,MGG_10402,MGG_15887,MGG_00112,MGG_03363,MGG_02383,MGG_15617,MGG_10474,MGG_02331,MGG_08003,MGG_06452,MGG_02335,MGG_02717,MGG_03395,MGG_09941,MGG_07833,MGG_01018,MGG_06156,MGG_05411,MGG_00826,MGG_08494,MGG_05553,MGG_05105,MGG_07832,MGG_08774,MGG_12983,MGG_13584,MGG_17422,MGG_10893,MGG_10487…
KEGG	Steroid biosynthesis	KEGG:00100	0.01670130472274098	1.7772496000049174	24	93	6	2038	MGG_10860,MGG_13986,MGG_04574,MGG_04938,MGG_17103,MGG_06765

## Sheet: Down-regulated_GO_KEGG
source	term_name	term_id	adjusted_p_value	negative_log10_of_adjusted_p_value	term_size	query_size	intersection_size	effective_domain_size	intersections
GO:MF	catalytic activity	GO:0003824	1.4760909052281487e-16	15.830886895613752	3693	609	353	9048	MGG_07530,MGG_04014,MGG_01212,MGG_03900,MGG_02378,MGG_09080,MGG_11636,MGG_11513,MGG_05949,MGG_08187,MGG_07067,MGG_11270,MGG_03316,MGG_01165,MGG_14756,MGG_06915,MGG_17041,MGG_15535,MGG_14785,MGG_15688,MGG_13783,MGG_15248,MGG_14797,MGG_05933,MGG_00604,MGG_02425,MGG_09195,MGG_02217,MGG_06441,MGG_05239,MGG_00572,MGG_13697,MGG_06489,MGG_02529,MGG_10012,MGG_00220,MGG_09601,MGG_02616,MGG_01662,MGG_01205…
GO:MF	oxidoreductase activity	GO:0016491	3.2268208125873294e-7	6.4912251505753975	938	609	110	9048	MGG_03900,MGG_05949,MGG_08187,MGG_07067,MGG_17041,MGG_15688,MGG_00572,MGG_06489,MGG_10012,MGG_00220,MGG_01205,MGG_01713,MGG_00779,MGG_08171,MGG_06695,MGG_16630,MGG_13928,MGG_07460,MGG_15038,MGG_08690,MGG_04244,MGG_07463,MGG_07455,MGG_15599,MGG_07708,MGG_10413,MGG_01404,MGG_05506,MGG_09156,MGG_02439,MGG_10613,MGG_17829,MGG_16926,MGG_08262,MGG_03097,MGG_08173,MGG_17472,MGG_14956,MGG_02914,MGG_02084…
GO:MF	cofactor binding	GO:0048037	0.000029519780731700172	4.529886872708289	611	609	75	9048	MGG_09492,MGG_02378,MGG_05949,MGG_08187,MGG_07067,MGG_15248,MGG_00572,MGG_10012,MGG_01662,MGG_01205,MGG_00779,MGG_02525,MGG_16630,MGG_13928,MGG_03945,MGG_15038,MGG_08690,MGG_07224,MGG_00385,MGG_03583,MGG_03494,MGG_15599,MGG_07708,MGG_02812,MGG_05506,MGG_09156,MGG_05067,MGG_08262,MGG_03097,MGG_03940,MGG_08173,MGG_17472,MGG_14956,MGG_14348,MGG_02084,MGG_06547,MGG_08584,MGG_02836,MGG_09589,MGG_08011…
GO:MF	coenzyme binding	GO:0050662	0.0005408621340380742	3.266913422614069	348	609	47	9048	MGG_09492,MGG_02378,MGG_05949,MGG_08187,MGG_07067,MGG_10012,MGG_01662,MGG_01205,MGG_00779,MGG_02525,MGG_16630,MGG_03945,MGG_15038,MGG_08690,MGG_07224,MGG_03583,MGG_03494,MGG_07708,MGG_02812,MGG_05506,MGG_05067,MGG_08262,MGG_03097,MGG_03940,MGG_08173,MGG_17472,MGG_02084,MGG_06547,MGG_08011,MGG_06179,MGG_04034,MGG_09072,MGG_01892,MGG_02203,MGG_01566,MGG_08527,MGG_10969,MGG_16316,MGG_12601,MGG_02559…
GO:MF	vitamin binding	GO:0019842	0.002167354524086009	2.6640700433359474	119	609	22	9048	MGG_09492,MGG_02378,MGG_15248,MGG_01662,MGG_02525,MGG_03945,MGG_15038,MGG_07224,MGG_00385,MGG_03583,MGG_03494,MGG_02812,MGG_05067,MGG_03940,MGG_09589,MGG_01892,MGG_10969,MGG_12175,MGG_16971,MGG_02559,MGG_15100,MGG_14042
GO:MF	lyase activity	GO:0016829	0.004856992773655293	2.3136325426797257	134	609	23	9048	MGG_02378,MGG_02616,MGG_16966,MGG_03645,MGG_07462,MGG_07224,MGG_08584,MGG_02836,MGG_07602,MGG_17962,MGG_01892,MGG_01628,MGG_13895,MGG_02451,MGG_08615,MGG_03096,MGG_07935,MGG_07782,MGG_00450,MGG_08317,MGG_10817,MGG_03793,MGG_10671
GO:MF	small molecule binding	GO:0036094	0.016992136900740525	1.7697520015992918	1477	609	134	9048	MGG_04014,MGG_09492,MGG_02378,MGG_09080,MGG_11636,MGG_11513,MGG_05949,MGG_08187,MGG_07067,MGG_01165,MGG_15535,MGG_13783,MGG_15248,MGG_14797,MGG_00604,MGG_02425,MGG_06441,MGG_05239,MGG_13697,MGG_06489,MGG_10012,MGG_00220,MGG_01662,MGG_01205,MGG_14098,MGG_11039,MGG_07545,MGG_04042,MGG_04146,MGG_03095,MGG_00779,MGG_08622,MGG_02525,MGG_13203,MGG_16630,MGG_12603,MGG_12568,MGG_12118,MGG_07525,MGG_03945…
GO:MF	ion binding	GO:0043167	0.03254272672562834	1.4875460607328703	2326	609	195	9048	MGG_04014,MGG_09492,MGG_08199,MGG_07131,MGG_02378,MGG_09080,MGG_11636,MGG_11513,MGG_05949,MGG_08187,MGG_07067,MGG_01165,MGG_15535,MGG_13783,MGG_15248,MGG_14797,MGG_00604,MGG_02425,MGG_06441,MGG_05239,MGG_00572,MGG_13697,MGG_06489,MGG_10012,MGG_00220,MGG_02616,MGG_01662,MGG_01205,MGG_14098,MGG_11039,MGG_07545,MGG_08295,MGG_00316,MGG_04042,MGG_07066,MGG_04146,MGG_03095,MGG_00779,MGG_08622,MGG_02525…
GO:BP	small molecule catabolic process	GO:0044282	1.0732510633574366e-8	7.969298672557317	83	604	26	8731	MGG_04014,MGG_02616,MGG_01662,MGG_01743,MGG_02617,MGG_15038,MGG_07224,MGG_04244,MGG_14348,MGG_02836,MGG_05317,MGG_04034,MGG_04861,MGG_06332,MGG_17513,MGG_04826,MGG_07457,MGG_00317,MGG_10969,MGG_06691,MGG_03840,MGG_02921,MGG_09063,MGG_07935,MGG_08476,MGG_15250
GO:BP	carboxylic acid catabolic process	GO:0046395	1.2990859561727688e-8	7.886362112162937	55	604	21	8731	MGG_02616,MGG_01662,MGG_01743,MGG_02617,MGG_15038,MGG_07224,MGG_04244,MGG_14348,MGG_02836,MGG_04034,MGG_04861,MGG_06332,MGG_17513,MGG_04826,MGG_07457,MGG_00317,MGG_10969,MGG_06691,MGG_03840,MGG_07935,MGG_08476
GO:BP	organic acid catabolic process	GO:0016054	1.2990859561727688e-8	7.886362112162937	55	604	21	8731	MGG_02616,MGG_01662,MGG_01743,MGG_02617,MGG_15038,MGG_07224,MGG_04244,MGG_14348,MGG_02836,MGG_04034,MGG_04861,MGG_06332,MGG_17513,MGG_04826,MGG_07457,MGG_00317,MGG_10969,MGG_06691,MGG_03840,MGG_07935,MGG_08476
GO:BP	organic acid metabolic process	GO:0006082	7.853468164033634e-8	7.104938512442484	338	604	57	8731	MGG_02378,MGG_09080,MGG_01165,MGG_17041,MGG_13783,MGG_02616,MGG_01662,MGG_07545,MGG_04042,MGG_08171,MGG_02525,MGG_01743,MGG_02617,MGG_16630,MGG_15038,MGG_07224,MGG_04244,MGG_03583,MGG_00919,MGG_11267,MGG_05067,MGG_07202,MGG_14816,MGG_10252,MGG_03097,MGG_04825,MGG_08173,MGG_14348,MGG_04590,MGG_01507,MGG_02836,MGG_07602,MGG_17962,MGG_04017,MGG_08011,MGG_04034,MGG_04861,MGG_06332,MGG_14061,MGG_00942…
GO:BP	carboxylic acid metabolic process	GO:0019752	1.300862304935744e-7	6.885768670672371	324	604	55	8731	MGG_02378,MGG_09080,MGG_01165,MGG_17041,MGG_13783,MGG_02616,MGG_01662,MGG_07545,MGG_04042,MGG_08171,MGG_02525,MGG_01743,MGG_02617,MGG_16630,MGG_15038,MGG_07224,MGG_04244,MGG_03583,MGG_00919,MGG_11267,MGG_05067,MGG_07202,MGG_14816,MGG_10252,MGG_03097,MGG_08173,MGG_14348,MGG_04590,MGG_01507,MGG_02836,MGG_07602,MGG_17962,MGG_04017,MGG_08011,MGG_04034,MGG_04861,MGG_06332,MGG_14061,MGG_00942,MGG_17513…
GO:BP	oxoacid metabolic process	GO:0043436	1.4431674377097498e-7	6.8406832787090845	334	604	56	8731	MGG_02378,MGG_09080,MGG_01165,MGG_17041,MGG_13783,MGG_02616,MGG_01662,MGG_07545,MGG_04042,MGG_08171,MGG_02525,MGG_01743,MGG_02617,MGG_16630,MGG_15038,MGG_07224,MGG_04244,MGG_03583,MGG_00919,MGG_11267,MGG_05067,MGG_07202,MGG_14816,MGG_10252,MGG_03097,MGG_04825,MGG_08173,MGG_14348,MGG_04590,MGG_01507,MGG_02836,MGG_07602,MGG_17962,MGG_04017,MGG_08011,MGG_04034,MGG_04861,MGG_06332,MGG_14061,MGG_00942…
GO:BP	oxidation-reduction process	GO:0055114	2.0193893543068965e-7	6.694779937557318	982	604	118	8731	MGG_03900,MGG_05949,MGG_08187,MGG_07067,MGG_17041,MGG_15688,MGG_00572,MGG_06489,MGG_10012,MGG_00220,MGG_01205,MGG_01713,MGG_00779,MGG_08171,MGG_06695,MGG_02617,MGG_16630,MGG_13928,MGG_07460,MGG_15038,MGG_08690,MGG_04244,MGG_07463,MGG_07455,MGG_15599,MGG_07708,MGG_10413,MGG_01404,MGG_05506,MGG_09156,MGG_02439,MGG_10613,MGG_17829,MGG_07202,MGG_16926,MGG_08262,MGG_03097,MGG_08173,MGG_17472,MGG_14956…
GO:BP	metabolic process	GO:0008152	6.816449833122987e-7	6.1664417572089585	4416	604	376	8731	MGG_07530,MGG_04014,MGG_01212,MGG_03900,MGG_08199,MGG_07131,MGG_02378,MGG_09080,MGG_01123,MGG_11636,MGG_11513,MGG_09541,MGG_05949,MGG_08187,MGG_07067,MGG_03316,MGG_01165,MGG_14756,MGG_06915,MGG_17041,MGG_15535,MGG_15688,MGG_02460,MGG_13783,MGG_15248,MGG_14797,MGG_05933,MGG_09195,MGG_02217,MGG_06441,MGG_07980,MGG_09313,MGG_00572,MGG_13697,MGG_06489,MGG_04746,MGG_02529,MGG_10012,MGG_00220,MGG_09601…
GO:BP	small molecule metabolic process	GO:0044281	0.000003848303860162304	5.414730643603641	629	604	82	8731	MGG_04014,MGG_02378,MGG_09080,MGG_01165,MGG_06915,MGG_17041,MGG_13783,MGG_06489,MGG_00220,MGG_02616,MGG_01662,MGG_07545,MGG_04042,MGG_13813,MGG_03095,MGG_00779,MGG_08622,MGG_03645,MGG_08171,MGG_02525,MGG_01743,MGG_02617,MGG_16630,MGG_03945,MGG_15038,MGG_07224,MGG_04244,MGG_03583,MGG_00919,MGG_11267,MGG_05067,MGG_07202,MGG_14816,MGG_10252,MGG_03097,MGG_04825,MGG_08173,MGG_14348,MGG_16212,MGG_04590…
GO:BP	cellular amino acid catabolic process	GO:0009063	0.00001023618020072554	4.9898620772698195	45	604	16	8731	MGG_01662,MGG_01743,MGG_15038,MGG_07224,MGG_04244,MGG_14348,MGG_04861,MGG_17513,MGG_04826,MGG_07457,MGG_00317,MGG_10969,MGG_06691,MGG_03840,MGG_07935,MGG_08476
GO:BP	cellular amino acid metabolic process	GO:0006520	0.00009520398255596137	4.02134488390648	216	604	37	8731	MGG_02378,MGG_09080,MGG_01165,MGG_17041,MGG_13783,MGG_01662,MGG_07545,MGG_04042,MGG_08171,MGG_02525,MGG_01743,MGG_15038,MGG_07224,MGG_04244,MGG_03583,MGG_00919,MGG_05067,MGG_14816,MGG_03097,MGG_14348,MGG_01507,MGG_04017,MGG_08011,MGG_04861,MGG_00942,MGG_17513,MGG_04826,MGG_07457,MGG_00317,MGG_10969,MGG_06691,MGG_03840,MGG_06095,MGG_04503,MGG_07935,MGG_08476,MGG_08074
GO:BP	antibiotic metabolic process	GO:0016999	0.00018957543467848387	3.7222179395442194	21	604	10	8731	MGG_02616,MGG_02617,MGG_07202,MGG_04590,MGG_02836,MGG_05317,MGG_04034,MGG_06011,MGG_00573,MGG_04337
GO:BP	alpha-amino acid catabolic process	GO:1901606	0.00025631121442938517	3.59123239163764	37	604	13	8731	MGG_01743,MGG_15038,MGG_07224,MGG_04244,MGG_14348,MGG_04861,MGG_17513,MGG_04826,MGG_07457,MGG_00317,MGG_10969,MGG_06691,MGG_08476
GO:BP	monocarboxylic acid catabolic process	GO:0072329	0.0009660548067710152	3.014998234243898	15	604	8	8731	MGG_02616,MGG_01662,MGG_02617,MGG_02836,MGG_04034,MGG_06332,MGG_00317,MGG_07935
GO:BP	alpha-amino acid metabolic process	GO:1901605	0.001353847306658254	2.8684303146872114	140	604	26	8731	MGG_02378,MGG_17041,MGG_07545,MGG_08171,MGG_02525,MGG_01743,MGG_15038,MGG_07224,MGG_04244,MGG_00919,MGG_14816,MGG_03097,MGG_14348,MGG_01507,MGG_08011,MGG_04861,MGG_17513,MGG_04826,MGG_07457,MGG_00317,MGG_10969,MGG_06691,MGG_06095,MGG_04503,MGG_08476,MGG_08074
GO:BP	transmembrane transport	GO:0055085	0.0022625307703229994	2.6454055056959684	593	604	70	8731	MGG_11124,MGG_03553,MGG_00993,MGG_01874,MGG_07980,MGG_16096,MGG_00917,MGG_04216,MGG_07066,MGG_17679,MGG_08279,MGG_05116,MGG_07843,MGG_04897,MGG_08580,MGG_17825,MGG_10534,MGG_05413,MGG_17677,MGG_13192,MGG_07444,MGG_09972,MGG_01373,MGG_02394,MGG_14937,MGG_15528,MGG_13651,MGG_05310,MGG_09778,MGG_04997,MGG_06332,MGG_04893,MGG_02124,MGG_06661,MGG_00464,MGG_09307,MGG_04099,MGG_00289,MGG_08309,MGG_04248…
GO:BP	antibiotic catabolic process	GO:0017001	0.0034738236209365695	2.4591922360900096	9	604	6	8731	MGG_02616,MGG_02617,MGG_02836,MGG_05317,MGG_04034,MGG_04337
GO:BP	drug catabolic process	GO:0042737	0.00894374300647337	2.048480688490973	36	604	11	8731	MGG_02616,MGG_02617,MGG_15038,MGG_02836,MGG_04034,MGG_04861,MGG_04337,MGG_04826,MGG_00317,MGG_06691,MGG_04732
GO:BP	one-carbon metabolic process	GO:0006730	0.031894634024666295	1.4962823768018048	12	604	6	8731	MGG_08171,MGG_15038,MGG_11267,MGG_05310,MGG_04861,MGG_04826
GO:BP	ribosomal large subunit biogenesis	GO:0042273	0.03276575143858497	1.4845798676318847	55	604	13	8731	MGG_02460,MGG_09313,MGG_07048,MGG_04467,MGG_07525,MGG_00840,MGG_06379,MGG_13803,MGG_06429,MGG_07126,MGG_01183,MGG_07718,MGG_12370
GO:BP	drug metabolic process	GO:0017144	0.041435822587722014	1.3826240350811114	150	604	24	8731	MGG_02616,MGG_03645,MGG_02525,MGG_02617,MGG_15038,MGG_07202,MGG_04590,MGG_02836,MGG_05317,MGG_04034,MGG_04861,MGG_17398,MGG_06011,MGG_00573,MGG_04337,MGG_04826,MGG_00317,MGG_10969,MGG_06691,MGG_00892,MGG_04732,MGG_07782,MGG_01906,MGG_04994
GO:CC	PeBoW complex	GO:0070545	0.04993980115396726	1.3015531912178848	3	570	3	8852	MGG_02460,MGG_09313,MGG_01183
KEGG	Metabolic pathways	KEGG:01100	1.7912341558243846e-19	18.746847638084326	958	159	130	2038	MGG_04014,MGG_03900,MGG_02378,MGG_09541,MGG_11270,MGG_14756,MGG_06915,MGG_17041,MGG_05933,MGG_06489,MGG_10012,MGG_00220,MGG_02616,MGG_01662,MGG_07545,MGG_13813,MGG_03095,MGG_00779,MGG_08622,MGG_03645,MGG_08171,MGG_07462,MGG_02525,MGG_01743,MGG_02617,MGG_16630,MGG_03933,MGG_02570,MGG_13928,MGG_10189,MGG_03945,MGG_11535,MGG_07460,MGG_15038,MGG_07224,MGG_06197,MGG_07463,MGG_03583,MGG_07455,MGG_00919…
KEGG	Carbon metabolism	KEGG:01200	2.1477610081603555e-8	7.668014046348521	109	159	29	2038	MGG_04014,MGG_02616,MGG_03095,MGG_08171,MGG_02525,MGG_02617,MGG_16630,MGG_15038,MGG_07224,MGG_05067,MGG_07202,MGG_08173,MGG_04590,MGG_11223,MGG_05317,MGG_17962,MGG_04034,MGG_04861,MGG_09072,MGG_13895,MGG_06011,MGG_13499,MGG_04826,MGG_01606,MGG_09856,MGG_03096,MGG_02813,MGG_09681,MGG_00450
KEGG	Valine, leucine and isoleucine degradation	KEGG:00280	7.28312142972985e-7	6.137682449098046	32	159	14	2038	MGG_03900,MGG_01662,MGG_03097,MGG_13647,MGG_11223,MGG_10320,MGG_00942,MGG_04449,MGG_02541,MGG_13499,MGG_01606,MGG_06511,MGG_03840,MGG_07890
KEGG	Biosynthesis of antibiotics	KEGG:01130	0.00001241729531126363	4.905972990255339	235	159	40	2038	MGG_03900,MGG_17041,MGG_06489,MGG_00220,MGG_13813,MGG_08622,MGG_03645,MGG_02525,MGG_02617,MGG_03945,MGG_15038,MGG_07224,MGG_03583,MGG_05067,MGG_07202,MGG_13647,MGG_16212,MGG_04590,MGG_11223,MGG_01507,MGG_08584,MGG_17962,MGG_08011,MGG_04861,MGG_01892,MGG_00942,MGG_04449,MGG_13895,MGG_06011,MGG_01566,MGG_13499,MGG_04826,MGG_06511,MGG_03840,MGG_03096,MGG_15250,MGG_09681,MGG_07782,MGG_00450,MGG_07890
KEGG	Methane metabolism	KEGG:00680	0.000014282186581899426	4.8452052976189	24	159	11	2038	MGG_04014,MGG_03095,MGG_02525,MGG_04590,MGG_05317,MGG_04034,MGG_09072,MGG_13895,MGG_06011,MGG_09856,MGG_03096
KEGG	Biosynthesis of secondary metabolites	KEGG:01110	0.00009831895990101184	4.007362724422258	341	159	49	2038	MGG_03900,MGG_02378,MGG_14756,MGG_17041,MGG_05933,MGG_06489,MGG_00220,MGG_02616,MGG_13813,MGG_08622,MGG_03645,MGG_02525,MGG_02617,MGG_10189,MGG_03945,MGG_15038,MGG_07224,MGG_03583,MGG_05067,MGG_07202,MGG_13647,MGG_16212,MGG_04590,MGG_03765,MGG_11223,MGG_01507,MGG_07602,MGG_17962,MGG_04861,MGG_01892,MGG_00942,MGG_04449,MGG_13895,MGG_06011,MGG_13499,MGG_04337,MGG_04826,MGG_06511,MGG_03840,MGG_03096…
KEGG	Glyoxylate and dicarboxylate metabolism	KEGG:00630	0.0005942713034358423	3.226015240733484	33	159	11	2038	MGG_02616,MGG_02525,MGG_02617,MGG_15038,MGG_07202,MGG_04590,MGG_04034,MGG_04861,MGG_13499,MGG_04826,MGG_02813
KEGG	Propanoate metabolism	KEGG:00640	0.001209148691220428	2.9175202898705135	24	159	9	2038	MGG_01662,MGG_04590,MGG_11223,MGG_02836,MGG_04449,MGG_13499,MGG_01606,MGG_06511,MGG_03840
KEGG	Alanine, aspartate and glutamate metabolism	KEGG:00250	0.006578195302318882	2.1818932367426505	29	159	9	2038	MGG_02378,MGG_01662,MGG_03645,MGG_02525,MGG_01743,MGG_05067,MGG_17513,MGG_04503,MGG_08074
KEGG	Glycolysis / Gluconeogenesis	KEGG:00010	0.025382827430825528	1.5954600028397359	41	159	10	2038	MGG_03900,MGG_06489,MGG_00220,MGG_04590,MGG_01892,MGG_13895,MGG_06011,MGG_03096,MGG_00450,MGG_07890
KEGG	Pentose and glucuronate interconversions	KEGG:00040	0.03886039273121559	1.410492814643649	23	159	7	2038	MGG_06489,MGG_00220,MGG_07462,MGG_07463,MGG_01404,MGG_02914,MGG_16969
KEGG	beta-Alanine metabolism	KEGG:00410	0.03886039273121559	1.410492814643649	23	159	7	2038	MGG_03900,MGG_02378,MGG_01662,MGG_06197,MGG_11223,MGG_01606,MGG_07890
