# Supplementary material for: RNA-Seq Analysis of Magnaporthe grisea Transcriptome Reveals the High Potential of ZnO Nanoparticles as a Nanofungicide
Source: Front Plant Sci. 2022 Jun 10;13:896283. doi: 10.3389/fpls.2022.896283 (PMC9230574; doi:10.3389/fpls.2022.896283)
Supplement: Supplementary file 5 [file Table_5.xlsx]

## Sheet: Q-RT-PCR
	Supplementary Table 5: Q-RT-PCR validation results for six obtained DEGs by RNA-seq analysis; Actin was used as reference gene in the experiment
Sample	Target	CT	CT MEAN	Δ Ct	ΔΔ Ct	2^-ΔΔCT	Log2FC	FC				LOG2 FC
S1T	SDH1	21.396	21.107	1.012	-4.816	28.1683	4.816	7.184				2.845
S2T		21.113
S3T		20.812
S1C		25.891	25.923	5.828
S2C		26.002
S3C		25.876
A1T	AOX1	24.113	24.571	4.476	-1.435	2.70382	1.435	2.367				1.243
A2T		24.961
A3T		24.639
A1C		26.017	26.006	5.911
A2C		25.768
A3C		26.233
M1T	MEP	22.005	22.052	1.957	-3.073	8.41521	3.073	2.694				1.43
M2T		22.013
M3T		22.138
M1C		25.351	25.125	5.03
M2C		25.018
M3C		25.006
C1T	CYN1	31.231	31.011	10.916	2.985	0.126306	-2.985	0.31				-1.689
C2T		30.026
C3T		31.776
C1C		28.106	28.026	7.931
C2C		27.945
C3C		28.027
E1T	ERB1	29.841	29.985	9.89	2.429	0.185694	-2.429	0.479				-1.062
E2T		30.417
E3T		29.697
E1C		27.101	27.556	7.461
E2C		27.966
E3C		27.601
D1T	DRS1	31.021	30.912	10.817	3.003	0.12474	-3.003	0.387				-1.369
D2T		30.756
D3T		30.959
D1C		27.663	27.909	7.814
D2C		28.126
D3C		27.938
AC1	Actin	20.23	20.095
AC2		19.86
AC3		20.68
AC4		20.03
AC5		19.66
AC6		20.11
